# Supplementary material for: Zn(ii)-catalysed enantioselective addition of alcohols and tert-butyl hydroperoxide to isatin-derived N-Boc ketimines
Source: Royal Society of Chemistry journal article supplement (doi:10.1039/d3cc01527k), 2023-01-01
Supplement: d3cc01527k1.pdf [file d3cc01527k1.pdf]

## Electronic Supplemental Information

### Zn(II)-catalysed Enantioselective Addition of Alcohols and tert-Butyl Hydroperoxide to Isatin-derived N-Boc Ketimines

Jiaqi Hou, Leipeng Xue, Tianxu Yu, Jiahui Li, Shibo Yu, Chao Yao\* and Yue-Ming Li\*

State Key Laboratory of Medicinal Chemical Biology, College of Pharmacy and Tianjin Key  
Laboratory of Molecular Drug Research, Nankai University, Tianjin, 300350, China.

#### Contents

|                                                                                                                           |      |
|---------------------------------------------------------------------------------------------------------------------------|------|
| 1. Experimental Section .....                                                                                             | S1   |
| 1.1. General Information .....                                                                                            | S1   |
| 1.2. Optimization of Reaction Conditions.....                                                                             | S1   |
| 1.3 General Procedures for Enantioselective Addition of Alcohols and Peroxides to<br>Isatin-derived N-Boc Ketimines ..... | S2   |
| 1.4 Enantioselective Addition of Sulfur-based Nucleophiles to Isatin-derived N-Boc<br>Ketimine .....                      | S3   |
| 1.5 Enantioselective Addition of Alcohols and Peroxides to Cyclic Ketimine <b>6</b> .....                                 | S3   |
| 1.6 Computational Studies on the Key Intermediates of the Reactions. ....                                                 | S4   |
| 2. Characterization and ee Values of the Products .....                                                                   | S14  |
| 3. Copies of NMR Spectra of the Products.....                                                                             | S67  |
| 4. References.....                                                                                                        | S116 |

## 1. Experimental Section

### 1.1. General Information

$^1\text{H}$  NMR and  $^{13}\text{C}$   $\{^1\text{H}\}$  NMR spectra were recorded on 400 MHz nuclear magnetic resonance spectrometer with tetramethylsilane (TMS) as the internal standard. High performance liquid chromatography experiments were performed with Daicel chiral column (AD-H, OD-H, IA, AS-H, etc.). Specific rotations were measured with an automatic polarimeter. High-resolution mass spectra (HRMS) were obtained with Varian 7.0T Fourier transform ion cyclotron resonance mass spectrometer. The solvents (such as petroleum ether, ethyl acetate, dichloromethane, etc.) are analytically pure. The room temperature was 25 °C; the silica gel used for column chromatography was 200-300 mesh. Unless otherwise noted, commercial reagents were used as received. All drying solvents were handled in accordance with standard procedures and aldehydes were treated by vacuum distillation or recrystallization.

Ligands **L1-L8** were prepared as previously reported.<sup>1</sup>

### 1.2. Optimization of Reaction Conditions

The metal salts were first investigated. To our delight, the reaction catalyzed by zinc salts afforded the target products with excellent yield and ee, among which  $\text{Zn}(\text{ClO}_4)_2 \cdot 6\text{H}_2\text{O}$  was the best salt in terms of both the yield and enantioselectivity (Table S1, entry 6).  $\text{NiCl}_2$  could not facilitate the reaction and no product was obtained (Table S1, entry 7).  $\text{CH}_2\text{Cl}_2$  was still the best medium for the reaction. The addition of base also played a key role in the reaction. In the presence of DIPEA, compound **3a** could be obtained in 89% yield with 96% ee (Table S1, entry 11). The addition of a strong base or no base resulted in sharp decrease in enantioselectivity (Table S1, entry 12-14). In addition, reducing the catalyst loading or lowering the reaction temperature to 0 °C was also detrimental to both the yield and enantioselectivity of the reaction (Table S1, entry 16-17).

**Table S1.** Optimization of the Reaction Conditions <sup>a</sup>

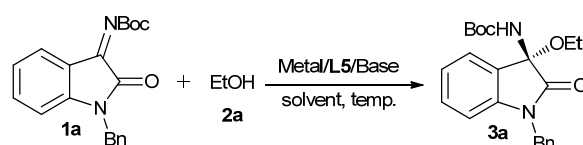

| entry | metal | base | solvent | yield (%) <sup>b</sup> | ee (%) <sup>c</sup> |
|-------|-------|------|---------|------------------------|---------------------|
|-------|-------|------|---------|------------------------|---------------------|

|                 |                                                       |                    |                                 |       |    |
|-----------------|-------------------------------------------------------|--------------------|---------------------------------|-------|----|
| 1               | Cu(OTf) <sub>2</sub>                                  | Et <sub>3</sub> N  | CH <sub>2</sub> Cl <sub>2</sub> | 93    | 72 |
| 2               | Cu(ClO <sub>4</sub> ) <sub>2</sub> ·6H <sub>2</sub> O | Et <sub>3</sub> N  | CH <sub>2</sub> Cl <sub>2</sub> | 80    | 60 |
| 3               | CuBr <sub>2</sub>                                     | Et <sub>3</sub> N  | CH <sub>2</sub> Cl <sub>2</sub> | 98    | 47 |
| 4               | CuOTf                                                 | Et <sub>3</sub> N  | CH <sub>2</sub> Cl <sub>2</sub> | 84    | 64 |
| 5               | Zn(OTf) <sub>2</sub>                                  | Et <sub>3</sub> N  | CH <sub>2</sub> Cl <sub>2</sub> | 93    | 75 |
| 6               | Zn(ClO <sub>4</sub> ) <sub>2</sub> ·6H <sub>2</sub> O | Et <sub>3</sub> N  | CH <sub>2</sub> Cl <sub>2</sub> | 92    | 86 |
| 7               | NiCl <sub>2</sub>                                     | Et <sub>3</sub> N  | CH <sub>2</sub> Cl <sub>2</sub> | trace | -  |
| 8               | Zn(ClO <sub>4</sub> ) <sub>2</sub> ·6H <sub>2</sub> O | Et <sub>3</sub> N  | THF                             | 47    | 65 |
| 9               | Zn(ClO <sub>4</sub> ) <sub>2</sub> ·6H <sub>2</sub> O | Et <sub>3</sub> N  | CHCl <sub>3</sub>               | 83    | 76 |
| 10              | Zn(ClO <sub>4</sub> ) <sub>2</sub> ·6H <sub>2</sub> O | Et <sub>3</sub> N  | toluene                         | 41    | 80 |
| 11              | Zn(ClO <sub>4</sub> ) <sub>2</sub> ·6H <sub>2</sub> O | DIPEA              | CH <sub>2</sub> Cl <sub>2</sub> | 89    | 96 |
| 12              | Zn(ClO <sub>4</sub> ) <sub>2</sub> ·6H <sub>2</sub> O | -                  | CH <sub>2</sub> Cl <sub>2</sub> | 95    | 0  |
| 13              | Zn(ClO <sub>4</sub> ) <sub>2</sub> ·6H <sub>2</sub> O | NaHCO <sub>3</sub> | CH <sub>2</sub> Cl <sub>2</sub> | 85    | 12 |
| 14              | Zn(ClO <sub>4</sub> ) <sub>2</sub> ·6H <sub>2</sub> O | DBU                | CH <sub>2</sub> Cl <sub>2</sub> | 80    | 89 |
| 15              | Zn(ClO <sub>4</sub> ) <sub>2</sub> ·6H <sub>2</sub> O | piperidine         | CH <sub>2</sub> Cl <sub>2</sub> | 91    | 72 |
| 16 <sup>d</sup> | Zn(ClO <sub>4</sub> ) <sub>2</sub> ·6H <sub>2</sub> O | DIPEA              | CH <sub>2</sub> Cl <sub>2</sub> | 88    | 82 |
| 17 <sup>e</sup> | Zn(ClO <sub>4</sub> ) <sub>2</sub> ·6H <sub>2</sub> O | DIPEA              | CH <sub>2</sub> Cl <sub>2</sub> | 82    | 20 |

<sup>a</sup> Unless otherwise noted, all the reactions were performed with isatin-derived N-Boc ketimine **1a** (0.15 mmol), ethanol **2a** (1.5 mmol), base (0.015mmol), **L5** (10 mol%), and salt (10 mol%) in dry CH<sub>2</sub>Cl<sub>2</sub> (2.0 mL) at room temperature for 24 h. <sup>b</sup> Isolated yields. <sup>c</sup> The ee values were determined by HPLC. <sup>d</sup> **L5**:Zn(ClO<sub>4</sub>)<sub>2</sub>·6H<sub>2</sub>O:DIPEA = 1:1:1 (5 mol%). <sup>e</sup> Reaction was carried at 0 °C.

### 1.3 General Procedures for Enantioselective Addition of Alcohols and Peroxides to Isatin-derived N-Boc Ketimines

Binaphthyl-proline-based chiral ligand **L5** (8.4 mg, 0.015 mmol), Zn(ClO<sub>4</sub>)<sub>2</sub>·6H<sub>2</sub>O (5.6 mg, 0.015 mmol) and DIPEA (2.0 mg, 0.015 mmol) were stirred in a dry reaction tube in DCM (2.0 mL) at room temperature for 1 h, isatin-derived N-Boc ketimine **1** (0.15 mmol) and alcohols (or <sup>t</sup>BuOOH) were then added. The reaction mixture was stirred for 24 h at room

temperature and the reaction was monitored with TLC. After the consumption of ketimine **1**, the reaction mixture was directly purified with flash chromatography (petroleum ether : ethyl acetate = 4:1) on silica gel to give the desired products.

#### 1.4 Enantioselective Addition of Sulfur-based Nucleophiles to Isatin-derived N-Boc Ketimine

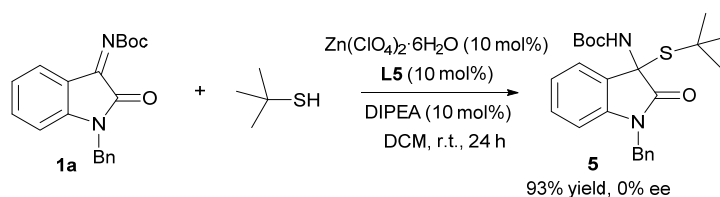

**Scheme S1.** Addition of Sulfur-based Nucleophiles to isatin-derived ketimine **1a**.

Binaphthyl-proline-based chiral ligand **L5** (8.4 mg, 0.015 mmol),  $\text{Zn}(\text{ClO}_4)_2 \cdot 6\text{H}_2\text{O}$  (5.6 mg, 0.015 mmol) and DIPEA (2.0 mg, 0.015 mmol) were stirred in a dry reaction tube in DCM (2.0 mL) at room temperature for 1 h, isatin-derived N-Boc ketimine **1a** (0.15 mmol) and  $t\text{-BuSH}$  were then added. The reaction mixture was stirred for 24 h at room temperature and the reaction was monitored with TLC. After the consumption of ketimine **1a**, the reaction mixture was directly purified with flash chromatography (petroleum ether : ethyl acetate = 4:1) on silica gel to give the desired product **5**.

#### 1.5 Enantioselective Addition of Alcohols and Peroxides to Cyclic Ketimine **6**

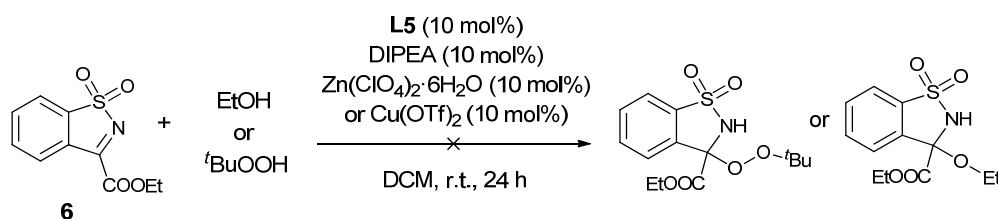

**Scheme S2.** Addition of Alcohols and Peroxides to Cyclic Ketimine **6**.

## 1.6 Computational Studies on the Key Intermediates of the Reactions.

DFT calculations were carried out to get structural insights into the reaction. The following structures **7a** and **7b** were proposed as key intermediates leading to the desired products.

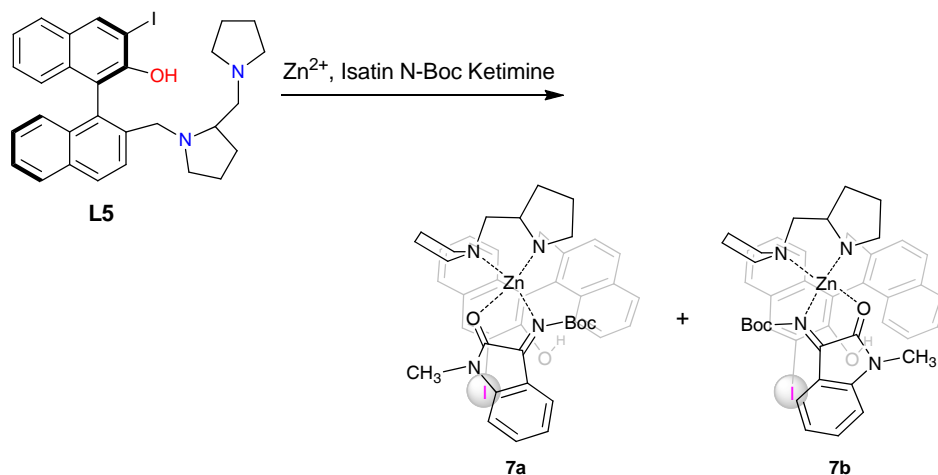

Intermediate **7a** corresponds to Si-attack, and led to products with (S)-configuration. Intermediate **7b** corresponds to Re-attack, and led to products with (R)-configuration. DFT calculations on **7a/7b** were carried out with Gaussian G09 D01 package.<sup>2</sup> The intermediates were optimized at M06L level of theory<sup>3</sup> with 6-31+G(d) basis set for light atoms<sup>4</sup> and SDD for copper.<sup>5</sup> Implicit solvation model SMD<sup>6</sup> was used with dichloromethane as the solvent. Preliminary results showed that **7a** was favored over **7b** ( $\Delta E = -2.31$  kcal/mol), suggesting that Si-attack of the nucleophiles on the substrates was the predominant one.

Optimized structure of **7a**:

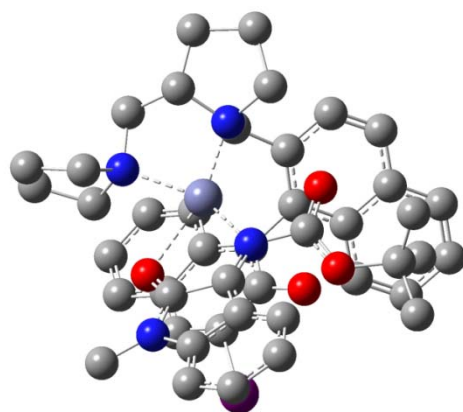

**7a**

## Coordinates:

| Atomic Number | Atomic Type | Coordinates (Angstroms) |           |           |
|---------------|-------------|-------------------------|-----------|-----------|
|               |             | X                       | Y         | Z         |
| 6             | 0           | 5.072438                | -0.886354 | -0.388740 |
| 6             | 0           | 3.799909                | -0.556470 | 0.022950  |
| 6             | 0           | 3.337053                | -0.892069 | 1.324251  |
| 6             | 0           | 4.252672                | -1.551494 | 2.208265  |
| 6             | 0           | 5.551667                | -1.884636 | 1.752500  |
| 6             | 0           | 5.955226                | -1.568236 | 0.475894  |
| 1             | 0           | 5.400195                | -0.613680 | -1.390474 |
| 1             | 0           | 3.144278                | -0.020088 | -0.661165 |
| 6             | 0           | 2.003129                | -0.593868 | 1.775649  |
| 6             | 0           | 3.845663                | -1.836524 | 3.531742  |
| 1             | 0           | 6.227303                | -2.390608 | 2.441887  |
| 1             | 0           | 6.955661                | -1.829646 | 0.135524  |
| 6             | 0           | 2.588664                | -1.494087 | 3.958052  |
| 6             | 0           | 1.642734                | -0.893464 | 3.088669  |
| 1             | 0           | 4.551534                | -2.314009 | 4.210441  |
| 1             | 0           | 2.295526                | -1.686459 | 4.990008  |
| 6             | 0           | 1.054188                | 0.031289  | 0.806906  |
| 6             | 0           | 0.653643                | 1.401457  | 0.911194  |
| 6             | 0           | 0.682506                | -0.698331 | -0.324808 |
| 6             | 0           | 1.050378                | 2.231625  | 1.990974  |
| 6             | 0           | -0.167509               | 1.975317  | -0.112497 |
| 6             | 0           | -0.111409               | -0.108691 | -1.339915 |
| 6             | 0           | 0.623409                | 3.539569  | 2.075597  |
| 1             | 0           | 1.705359                | 1.824983  | 2.761011  |
| 6             | 0           | -0.592612               | 3.321802  | 0.003913  |
| 6             | 0           | -0.536951               | 1.190005  | -1.231079 |

|   |   |           |           |           |
|---|---|-----------|-----------|-----------|
| 6 | 0 | -0.213585 | 4.090390  | 1.081307  |
| 1 | 0 | 0.941411  | 4.156111  | 2.914813  |
| 1 | 0 | -1.225838 | 3.735680  | -0.780877 |
| 1 | 0 | -1.145320 | 1.640640  | -2.013386 |
| 1 | 0 | -0.544608 | 5.124190  | 1.161400  |
| 8 | 0 | 1.093318  | -1.974121 | -0.528063 |
| 6 | 0 | 0.299839  | -0.543132 | 3.664947  |
| 1 | 0 | -0.137766 | 0.308199  | 3.135139  |
| 1 | 0 | 0.438111  | -0.231418 | 4.710005  |
| 6 | 0 | -0.285294 | -2.864153 | 4.340897  |
| 6 | 0 | -1.927763 | -1.266793 | 4.455001  |
| 6 | 0 | -0.395360 | -2.516025 | 5.830591  |
| 1 | 0 | 0.707204  | -3.171006 | 4.010391  |
| 1 | 0 | -0.981519 | -3.663782 | 4.067067  |
| 6 | 0 | -1.472169 | -1.416238 | 5.901733  |
| 1 | 0 | -2.660005 | -2.061967 | 4.237761  |
| 1 | 0 | -0.659138 | -3.402504 | 6.415705  |
| 1 | 0 | 0.561280  | -2.149998 | 6.222183  |
| 1 | 0 | -2.317205 | -1.684043 | 6.543410  |
| 1 | 0 | -1.065435 | -0.472420 | 6.285290  |
| 6 | 0 | -2.524478 | 0.039874  | 4.016977  |
| 1 | 0 | -3.412515 | 0.268309  | 4.620553  |
| 1 | 0 | -1.826461 | 0.873099  | 4.153924  |
| 6 | 0 | -4.341751 | -0.397881 | 2.458931  |
| 6 | 0 | -2.808768 | 1.257884  | 1.907685  |
| 6 | 0 | -5.079892 | 0.928687  | 2.683352  |
| 1 | 0 | -4.595372 | -1.184354 | 3.177823  |
| 1 | 0 | -4.520978 | -0.779619 | 1.451063  |
| 6 | 0 | -4.031407 | 2.022724  | 2.405386  |

|   |   |           |           |           |
|---|---|-----------|-----------|-----------|
| 1 | 0 | -2.851570 | 1.087832  | 0.826256  |
| 1 | 0 | -1.848186 | 1.727702  | 2.148147  |
| 1 | 0 | -5.942681 | 1.000316  | 2.013543  |
| 1 | 0 | -5.463668 | 1.002298  | 3.706797  |
| 1 | 0 | -4.367902 | 2.758237  | 1.667647  |
| 1 | 0 | -3.790496 | 2.572921  | 3.322983  |
| 7 | 0 | -2.884274 | -0.074527 | 2.570636  |
| 7 | 0 | -0.728383 | -1.641185 | 3.613290  |
| 8 | 0 | -3.036176 | -1.048187 | -0.191555 |
| 6 | 0 | -2.276540 | -3.314582 | -0.634978 |
| 6 | 0 | -3.134241 | -2.078567 | -0.856674 |
| 1 | 0 | 1.714900  | -2.225749 | 0.182907  |
| 7 | 0 | -1.411862 | -3.190778 | 0.327299  |
| 6 | 0 | -0.325680 | -4.070201 | 0.594368  |
| 8 | 0 | 0.213410  | -4.016541 | 1.684280  |
| 8 | 0 | 0.009848  | -4.802568 | -0.443198 |
| 6 | 0 | 1.200951  | -5.735616 | -0.371971 |
| 6 | 0 | 2.459070  | -4.932091 | -0.106057 |
| 1 | 0 | 2.440772  | -4.446420 | 0.874618  |
| 1 | 0 | 3.314330  | -5.617439 | -0.117458 |
| 1 | 0 | 2.627221  | -4.183987 | -0.889374 |
| 6 | 0 | 1.220374  | -6.331596 | -1.764565 |
| 1 | 0 | 2.107476  | -6.965206 | -1.872267 |
| 1 | 0 | 0.338579  | -6.954318 | -1.952440 |
| 1 | 0 | 1.265906  | -5.546655 | -2.528140 |
| 6 | 0 | 0.933147  | -6.786388 | 0.685701  |
| 1 | 0 | -0.033491 | -7.276784 | 0.519083  |
| 1 | 0 | 1.711578  | -7.555372 | 0.621136  |
| 1 | 0 | 0.952222  | -6.369613 | 1.696459  |



|    |   |           |           |           |
|----|---|-----------|-----------|-----------|
| 7  | 0 | -3.956972 | -2.332349 | -1.894125 |
| 6  | 0 | -3.732614 | -3.637906 | -2.358085 |
| 6  | 0 | -4.397742 | -4.268454 | -3.389616 |
| 6  | 0 | -2.709059 | -4.278851 | -1.609397 |
| 6  | 0 | -4.046261 | -5.596375 | -3.663848 |
| 1  | 0 | -5.172002 | -3.762564 | -3.961249 |
| 6  | 0 | -2.400853 | -5.617905 | -1.887277 |
| 6  | 0 | -3.073997 | -6.267037 | -2.916279 |
| 1  | 0 | -4.554051 | -6.117472 | -4.472862 |
| 1  | 0 | -1.652217 | -6.143364 | -1.306116 |
| 1  | 0 | -2.837870 | -7.303577 | -3.143138 |
| 6  | 0 | -4.864056 | -1.381610 | -2.496418 |
| 1  | 0 | -4.759979 | -0.430331 | -1.970983 |
| 1  | 0 | -4.609698 | -1.240958 | -3.552546 |
| 1  | 0 | -5.897087 | -1.734340 | -2.414402 |
| 30 | 0 | -1.598456 | -1.604984 | 1.696924  |
| 53 | 0 | -0.546651 | -1.237530 | -3.092223 |

Energies:

|                                              |              |
|----------------------------------------------|--------------|
| Sum of electronic and zero-point Energies=   | -2462.250585 |
| Sum of electronic and thermal Energies=      | -2462.202300 |
| Sum of electronic and thermal Enthalpies=    | -2462.201356 |
| Sum of electronic and thermal Free Energies= | -2462.330040 |

Number of imaginary frequency: 0

Optimized structure of **7b**:

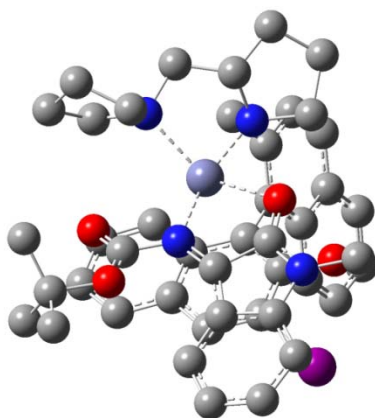

**7b**

Coordinates

| Atomic Number | Atomic Type | Coordinates (Angstroms) |           |           |
|---------------|-------------|-------------------------|-----------|-----------|
|               |             | X                       | Y         | Z         |
| 6             | 0           | 5.146365                | -1.030893 | -0.252634 |
| 6             | 0           | 3.811498                | -0.929228 | 0.069936  |
| 6             | 0           | 3.376064                | -0.963647 | 1.422230  |
| 6             | 0           | 4.376731                | -1.092853 | 2.440806  |
| 6             | 0           | 5.741754                | -1.204949 | 2.075864  |
| 6             | 0           | 6.123547                | -1.178000 | 0.755188  |
| 1             | 0           | 5.450199                | -0.995487 | -1.297228 |
| 1             | 0           | 3.082040                | -0.809171 | -0.729061 |
| 6             | 0           | 1.989214                | -0.858025 | 1.793729  |
| 6             | 0           | 3.979864                | -1.091340 | 3.796114  |
| 1             | 0           | 6.482111                | -1.306423 | 2.868956  |
| 1             | 0           | 7.174612                | -1.261032 | 0.484766  |
| 6             | 0           | 2.656605                | -0.953956 | 4.130090  |
| 6             | 0           | 1.644720                | -0.834289 | 3.143974  |
| 1             | 0           | 4.740112                | -1.191815 | 4.569962  |
| 1             | 0           | 2.360727                | -0.938519 | 5.178596  |

|   |   |           |           |           |
|---|---|-----------|-----------|-----------|
| 6 | 0 | 0.999984  | -0.780493 | 0.676348  |
| 6 | 0 | 0.401201  | 0.462355  | 0.293902  |
| 6 | 0 | 0.847177  | -1.894906 | -0.151216 |
| 6 | 0 | 0.552024  | 1.651231  | 1.055184  |
| 6 | 0 | -0.306888 | 0.548442  | -0.951722 |
| 6 | 0 | 0.168535  | -1.783424 | -1.392946 |
| 6 | 0 | 0.009246  | 2.843452  | 0.623623  |
| 1 | 0 | 1.126037  | 1.620588  | 1.980524  |
| 6 | 0 | -0.847087 | 1.790090  | -1.367072 |
| 6 | 0 | -0.386077 | -0.590891 | -1.784513 |
| 6 | 0 | -0.700523 | 2.917451  | -0.594589 |
| 1 | 0 | 0.141932  | 3.742029  | 1.224278  |
| 1 | 0 | -1.376230 | 1.830052  | -2.319785 |
| 1 | 0 | -0.876906 | -0.500366 | -2.753190 |
| 1 | 0 | -1.119071 | 3.867073  | -0.922983 |
| 8 | 0 | 1.398336  | -3.097533 | 0.128775  |
| 6 | 0 | 0.245251  | -0.647691 | 3.661438  |
| 1 | 0 | -0.205654 | 0.266509  | 3.249640  |
| 1 | 0 | 0.310244  | -0.500523 | 4.747555  |
| 6 | 0 | -0.103087 | -3.109206 | 3.572658  |
| 6 | 0 | -1.805451 | -1.819730 | 4.424207  |
| 6 | 0 | 0.003899  | -3.279642 | 5.090426  |
| 1 | 0 | 0.853328  | -3.175100 | 3.049765  |
| 1 | 0 | -0.785081 | 3.840697  | 325       |
| 6 | 0 | -1.144315 | -2.426045 | 5.660888  |
| 1 | 0 | -2.532873 | -2.542794 | 4.018569  |
| 1 | 0 | -0.070458 | -4.334603 | 5.372373  |
| 1 | 0 | 0.974726  | -2.918372 | 5.451517  |
| 1 | 0 | -1.870569 | -3.011641 | 6.232744  |

|   |   |           |           |           |
|---|---|-----------|-----------|-----------|
| 1 | 0 | -0.769673 | -1.639966 | 6.328433  |
| 6 | 0 | -2.478061 | -0.481924 | 4.579526  |
| 1 | 0 | -3.284051 | -0.548267 | 5.324015  |
| 1 | 0 | -1.764039 | 0.258235  | 4.952503  |
| 6 | 0 | -4.458461 | -0.409578 | 3.141987  |
| 6 | 0 | -3.001072 | 1.491640  | 3.175018  |
| 6 | 0 | -5.228959 | 0.750978  | 3.740338  |
| 1 | 0 | -4.612185 | -1.378680 | 3.630204  |
| 1 | 0 | -4.703774 | -0.523382 | 2.077421  |
| 6 | 0 | -4.458958 | 1.953569  | 3.206974  |
| 1 | 0 | -2.497464 | 1.799345  | 2.256451  |
| 1 | 0 | -2.430943 | 1.877030  | 4.026138  |
| 1 | 0 | -6.283920 | 0.746270  | 3.446553  |
| 1 | 0 | -5.186416 | 0.711747  | 4.837359  |
| 1 | 0 | -4.793176 | 2.195941  | 2.191117  |
| 1 | 0 | -4.587664 | 2.851040  | 3.820327  |
| 7 | 0 | -3.014590 | -0.018960 | 3.263700  |
| 7 | 0 | -0.718390 | -1.767644 | 3.373657  |
| 8 | 0 | -1.941312 | -3.373821 | 1.134632  |
| 6 | 0 | -3.037490 | -2.236745 | -0.715739 |
| 6 | 0 | -2.447585 | -3.435501 | 0.010570  |
| 1 | 0 | 1.889854  | -3.042571 | 0.970645  |
| 7 | 0 | -3.056221 | -1.149861 | 0.000313  |
| 6 | 0 | -3.740819 | 0.052390  | -0.328595 |
| 8 | 0 | -3.470927 | 1.071169  | 0.276090  |
| 8 | 0 | -4.680857 | -0.132349 | -1.231401 |
| 6 | 0 | -5.628648 | 0.991683  | -1.592493 |
| 6 | 0 | -6.419327 | 1.366351  | -0.356442 |
| 1 | 0 | -5.792860 | 1.843656  | 0.402252  |

|    |   |           |           |           |
|----|---|-----------|-----------|-----------|
| 1  | 0 | -7.201938 | 2.078676  | -0.641249 |
| 1  | 0 | -6.909388 | 0.487673  | 0.080301  |
| 6  | 0 | -6.514390 | 0.344058  | -2.636644 |
| 1  | 0 | -7.298437 | 1.050730  | -2.929519 |
| 1  | 0 | -5.951473 | 0.077780  | -3.537935 |
| 1  | 0 | -6.997684 | -0.558238 | -2.245453 |
| 6  | 0 | -4.834856 | 2.144570  | -2.171988 |
| 1  | 0 | -4.197255 | 1.806318  | -2.998017 |
| 1  | 0 | -5.535893 | 2.883929  | -2.576441 |
| 1  | 0 | -4.214019 | 2.638119  | -1.419136 |
| 7  | 0 | -2.639428 | -4.518113 | -0.761581 |
| 6  | 0 | -3.207525 | -4.118462 | -1.987166 |
| 6  | 0 | -3.468803 | -4.924398 | -3.074422 |
| 6  | 0 | -3.444442 | -2.718227 | -2.004284 |
| 6  | 0 | -3.946546 | -4.300634 | -4.234665 |
| 1  | 0 | -3.290509 | -5.996629 | -3.045897 |
| 6  | 0 | -3.882915 | -2.116346 | -3.192741 |
| 6  | 0 | -4.129872 | -2.916267 | -4.302141 |
| 1  | 0 | -4.159780 | -4.911144 | -5.109769 |
| 1  | 0 | -4.008786 | -1.041367 | -3.254601 |
| 1  | 0 | -4.470700 | -2.461308 | -5.228757 |
| 6  | 0 | -2.198774 | -5.859926 | -0.447576 |
| 1  | 0 | -1.731406 | -5.843864 | 0.538645  |
| 1  | 0 | -3.052330 | -6.544816 | -0.438740 |
| 1  | 0 | -1.467404 | -6.195719 | -1.190581 |
| 30 | 0 | -1.922769 | -1.182159 | 1.764735  |
| 53 | 0 | 0.214003  | -3.421709 | -2.755449 |

Energies:

|                                              |              |
|----------------------------------------------|--------------|
| Sum of electronic and zero-point Energies=   | -2462.248098 |
| Sum of electronic and thermal Energies=      | -2462.199851 |
| Sum of electronic and thermal Enthalpies=    | -2462.198907 |
| Sum of electronic and thermal Free Energies= | -2462.326363 |

Number of imaginary frequency: 0.

## 2. Characterization and ee Values of the Products

### (S)-tert-butyl-(1-benzyl-3-ethoxy-2-oxindolin-3-yl)carbamate (3a)

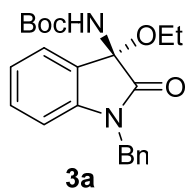

White solid, 95% yield, 96% ee, mp 121-123 °C.  $[\alpha]_D^{20} = -3.00$  (c = 1.00, CH<sub>2</sub>Cl<sub>2</sub>). <sup>1</sup>H NMR (400 MHz, CDCl<sub>3</sub>) δ 7.68 (d, J = 7.0 Hz, 1H), 7.32 (q, J = 8.1 Hz, 4H), 7.27 – 7.18 (m, 2H), 7.06 (t, J = 7.5 Hz, 1H), 6.70 (d, J = 7.8 Hz, 1H), 5.63 (s, 1H), 4.99 (d, J = 15.7 Hz, 1H), 4.84 (d, J = 15.7 Hz, 1H), 3.50 (q, J = 7.0 Hz, 2H), 1.34 (s, 9H), 1.16 (t, J = 7.0 Hz, 3H). <sup>13</sup>C {<sup>1</sup>H} NMR (100 MHz, CDCl<sub>3</sub>) δ 172.7, 153.3, 142.9, 135.4, 130.3, 128.8, 127.7, 127.3, 126.3, 125.8, 123.2, 109.5, 84.4, 80.6, 59.7, 44.0, 28.2, 15.3. HRMS-ESI(m/z): [M+Na]<sup>+</sup> calcd for C<sub>22</sub>H<sub>26</sub>N<sub>2</sub>NaO<sub>4</sub><sup>+</sup> 405.1785, found 405.1789. The ee value was determined by chiral HPLC analysis (Chiralcel IA, hexane/i-PrOH = 70/30 flow rate = 1.0 mL/min, λ = 220 nm). Retention times: t<sub>R</sub> = 5.2 min for (*S*)-isomer and t<sub>R</sub> = 15.7 min for (*R*)-isomer.

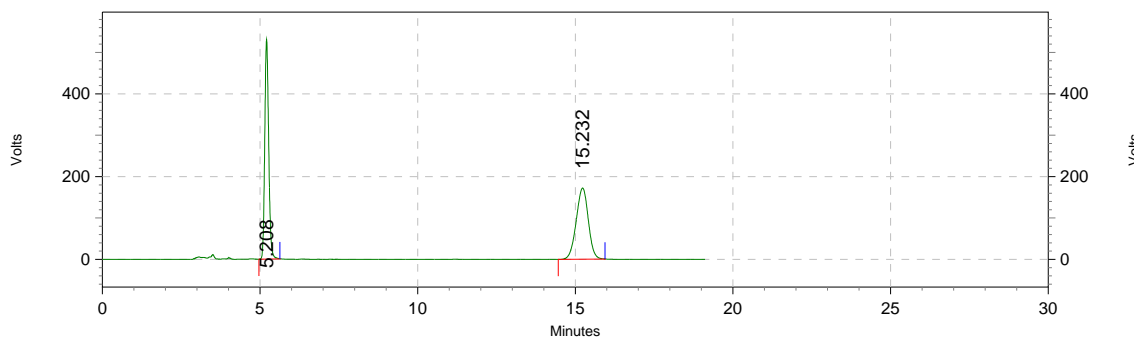

| Peaks | Ret. Time | Area    | Area%  |
|-------|-----------|---------|--------|
| 1     | 5.208     | 4569753 | 50.011 |
| 2     | 15.232    | 4567736 | 49.989 |

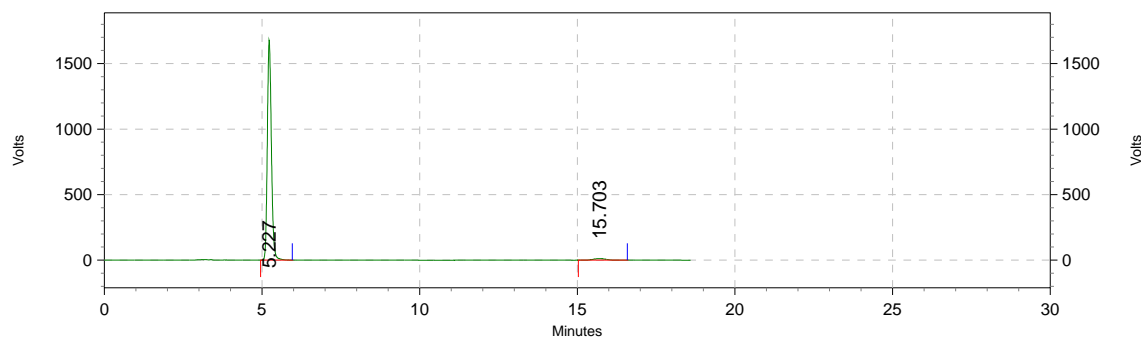

| Peaks | Ret. Time | Area     | Area%  |
|-------|-----------|----------|--------|
| 1     | 5.227     | 14940173 | 97.785 |
| 2     | 15.703    | 338350   | 2.215  |

**(S)-tert-butyl-(3-ethoxy-1-methyl-2-oxindolin-3-yl)carbamate (3b)<sup>7</sup>**

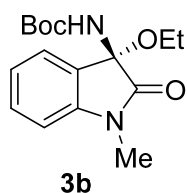

White solid, 93% yield, 96% ee, mp 112-114 °C.  $[\alpha]_{\text{D}}^{20} = -8.20$  (c = 1.00, CH<sub>2</sub>Cl<sub>2</sub>). Reference:  $[\alpha]_{\text{D}}^{20} = +21$  (c = 1.0, CH<sub>2</sub>Cl<sub>2</sub>) for (R)-configuration. <sup>1</sup>H NMR (400 MHz, CDCl<sub>3</sub>) δ 7.58 (s, 1H), 7.27 (s, 1H), 7.03 (s, 1H), 6.76 (d, J = 6.1 Hz, 1H), 5.54 (s, 1H), 3.43 – 3.35 (m, 2H), 3.13 (s, 3H), 1.23 (s, 9H), 1.06 (s, 3H). <sup>13</sup>C {<sup>1</sup>H} NMR (100 MHz, CDCl<sub>3</sub>) δ 171.4, 152.2, 142.7, 129.4, 125.3, 124.6, 122.1, 107.4, 83.3, 79.4, 58.6, 27.1, 25.2, 14.2. The ee value was determined by chiral HPLC analysis (Chiralcel IA-H, hexane/i-PrOH = 70/30 flow rate = 1.0 mL/min, λ = 220 nm). Retention times: t<sub>R</sub> = 7.0 min for (S)-isomer and t<sub>R</sub> = 12.8 min for (R)-isomer.

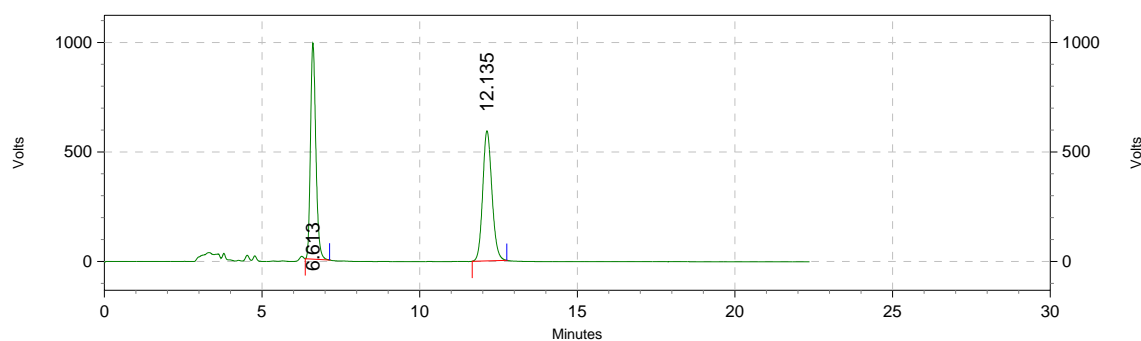



| Peaks | Ret. Time | Area     | Area%  |
|-------|-----------|----------|--------|
| 1     | 6.613     | 11702370 | 49.234 |
| 2     | 12.135    | 12066623 | 50.766 |

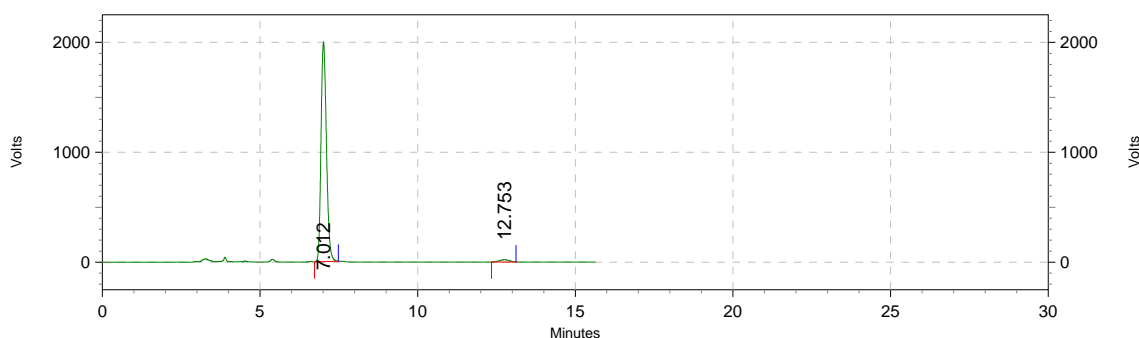

| Peaks | Ret. Time | Area     | Area%  |
|-------|-----------|----------|--------|
| 1     | 7.012     | 23870153 | 98.180 |
| 2     | 12.753    | 442466   | 1.820  |

**(S)-tert-butyl-(3-ethoxy-1-ethyl-2-oxoindolin-3-yl)carbamate (3c)**

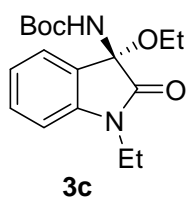

White solid, 94% yield, 94% ee, mp 133-135 °C.  $[\alpha]_D^{20} = -1.81$  ( $c = 1.00$ ,  $\text{CH}_2\text{Cl}_2$ ).  $^1\text{H}$  NMR (400 MHz,  $\text{CDCl}_3$ )  $\delta$  7.72 (s, 1H), 7.34 (s, 1H), 7.10 (s, 1H), 6.86 (s, 1H), 5.51 (s, 1H), 3.76 (d,  $J = 43.8$  Hz, 2H), 3.45 (s, 2H), 1.33 (s, 9H), 1.29 (s, 3H), 1.14 (s, 3H).  $^{13}\text{C}$   $\{^1\text{H}\}$  NMR (100 MHz,  $\text{CDCl}_3$ )  $\delta$  172.1, 153.2, 142.8, 130.3, 126.4, 126.2, 122.9, 108.5, 84.2, 80.4, 59.5, 34.8, 28.1, 15.2, 12.6. HRMS-ESI( $m/z$ ):  $[\text{M}+\text{Na}]^+$  calcd for  $\text{C}_{17}\text{H}_{24}\text{N}_2\text{NaO}_4^+$  343.1628, found 343.1629. The ee value was determined by chiral HPLC analysis (Chiralcel IA, hexane/*i*-PrOH = 70/30 flow rate = 1.0 mL/min,  $\lambda = 220$  nm). Retention times:  $t_R = 5.7$  min for (*S*)-isomer and  $t_R = 11.4$  min for (*R*)-isomer.

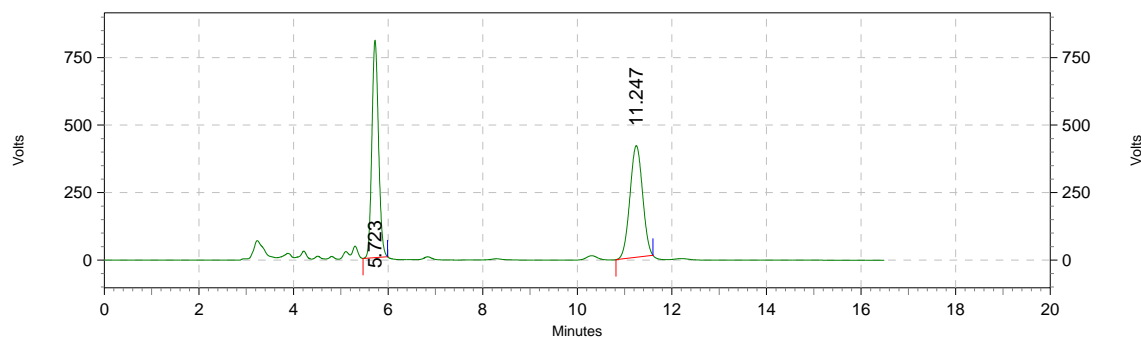

| Peaks | Ret. Time | Area    | Area%  |
|-------|-----------|---------|--------|
| 1     | 5.723     | 7845771 | 50.607 |
| 2     | 11.247    | 7657623 | 49.393 |

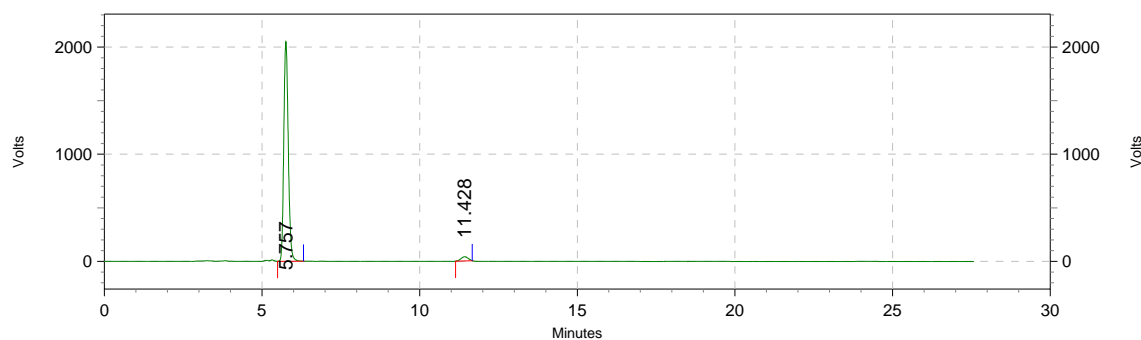

| Peaks | Ret. Time | Area     | Area%  |
|-------|-----------|----------|--------|
| 1     | 5.757     | 20289378 | 97.114 |
| 2     | 11.428    | 603058   | 2.886  |

**(S)-tert-butyl-(1-allyl-3-ethoxy-2-oxindolin-3-yl)carbamate (3d)**

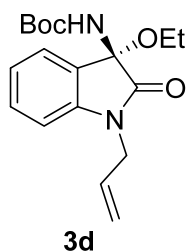

White solid, 92% yield, 94% ee. mp 124-126 °C.  $[\alpha]_D^{20} = -11.2$  (c = 1.00, CH<sub>2</sub>Cl<sub>2</sub>). <sup>1</sup>H NMR (400 MHz, CDCl<sub>3</sub>) δ 7.69 (d, J = 7.3 Hz, 1H), 7.31 (td, J = 7.8, 1.2 Hz, 1H), 7.12 – 7.07 (m, 1H), 6.83 (d, J = 7.8 Hz, 1H), 5.84 (ddd, J = 22.4, 10.4, 5.2 Hz, 1H), 5.60 (s, 1H), 5.33 – 5.20 (m, 2H), 4.43 (dd, J = 16.4, 4.9 Hz, 1H), 4.26 (dd, J = 16.3, 4.6 Hz, 1H), 3.48 (q, J = 7.0 Hz,

2H), 1.33 (s, 9H), 1.15 (t, J = 7.0 Hz, 3H).  $^{13}\text{C}$   $\{^1\text{H}\}$  NMR (100 MHz,  $\text{CDCl}_3$ )  $\delta$  172.2, 153.2, 142.9, 131.0, 130.3, 126.2, 125.8, 123.1, 117.9, 109.3, 84.3, 80.4, 59.6, 42.4, 28.1, 15.2. HRMS-ESI(m/z):  $[\text{M}+\text{Na}]^+$  calcd for  $\text{C}_{18}\text{H}_{24}\text{N}_2\text{NaO}_4^+$  355.1628, found 355.1631. The ee value was determined by chiral HPLC analysis (Chiralcel IA, hexane/i-PrOH = 70/30 flow rate = 1.0 mL/min,  $\lambda = 220$  nm). Retention times:  $t_{\text{R}} = 5.4$  min for (*S*)-isomer and  $t_{\text{R}} = 12.7$  min for (*R*)-isomer.

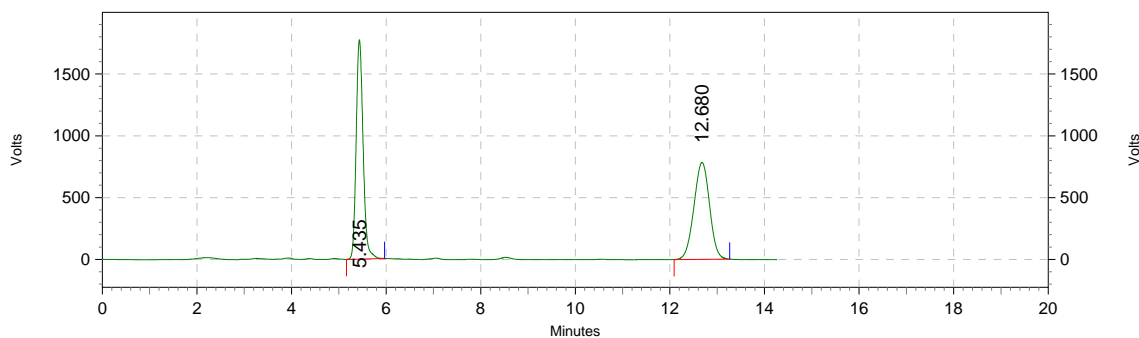

| Peaks | Ret. Time | Area     | Area%  |
|-------|-----------|----------|--------|
| 1     | 5.435     | 18080318 | 50.146 |
| 2     | 12.680    | 17974877 | 49.854 |

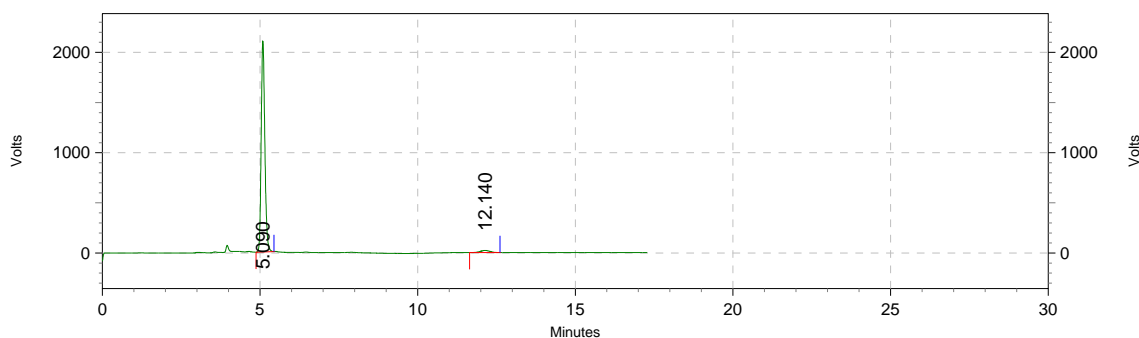

| Peaks | Ret. Time | Area     | Area%  |
|-------|-----------|----------|--------|
| 1     | 5.090     | 16879962 | 97.374 |
| 2     | 12.140    | 455180   | 2.626  |

**(S)-tert-butyl-(1-benzyl-3-methoxy-2-oxindolin-3-yl)carbamate (3e)**<sup>7</sup>

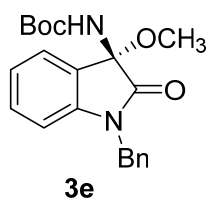

White solid, 95% yield, 96% ee, mp 132-134 °C.  $[\alpha]_D^{20} = -4.41$  (c = 1.60, CH<sub>2</sub>Cl<sub>2</sub>). <sup>1</sup>H NMR (400 MHz, CDCl<sub>3</sub>) δ 7.77 (d, J = 6.1 Hz, 1H), 7.33 (s, 4H), 7.27 – 7.20 (m, 2H), 7.08 (t, J = 7.3 Hz, 1H), 6.72 (d, J = 7.7 Hz, 1H), 5.66 (s, 1H), 4.99 (d, J = 15.7 Hz, 1H), 4.84 (d, J = 15.7 Hz, 1H), 3.30 (s, 3H), 1.36 (s, 9H). <sup>13</sup>C {<sup>1</sup>H} NMR (100 MHz, CDCl<sub>3</sub>) δ 172.3, 153.4, 142.9, 135.3, 130.4, 128.9, 127.8, 127.3, 126.4, 125.7, 109.5, 84.6, 80.7, 51.7, 43.9, 28.2. The ee value was determined by chiral HPLC analysis (Chiralcel IA, hexane/i-PrOH = 70/30 flow rate = 1.0 mL/min, λ = 220 nm). Retention times: t<sub>R</sub> = 6.4 min for (*S*)-isomer and t<sub>R</sub> = 14.5 min for (*R*)-isomer.

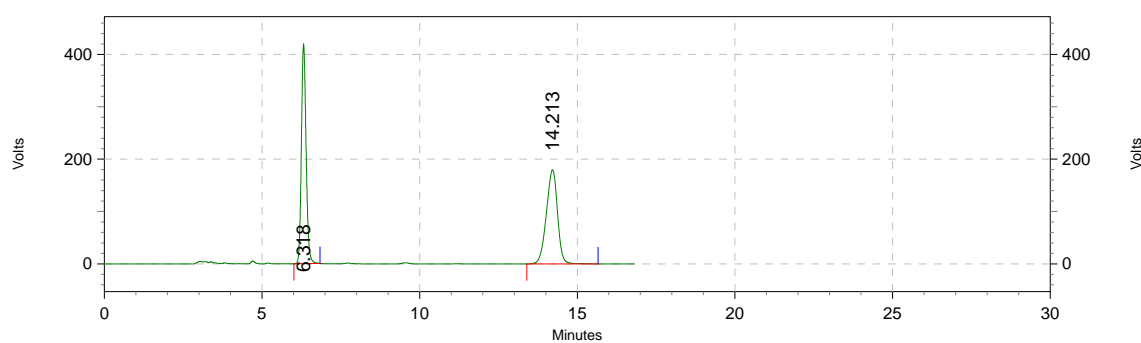

| Peaks | Ret. Time | Area    | Area%  |
|-------|-----------|---------|--------|
| 1     | 6.318     | 4351620 | 49.740 |
| 2     | 14.213    | 4397084 | 50.260 |

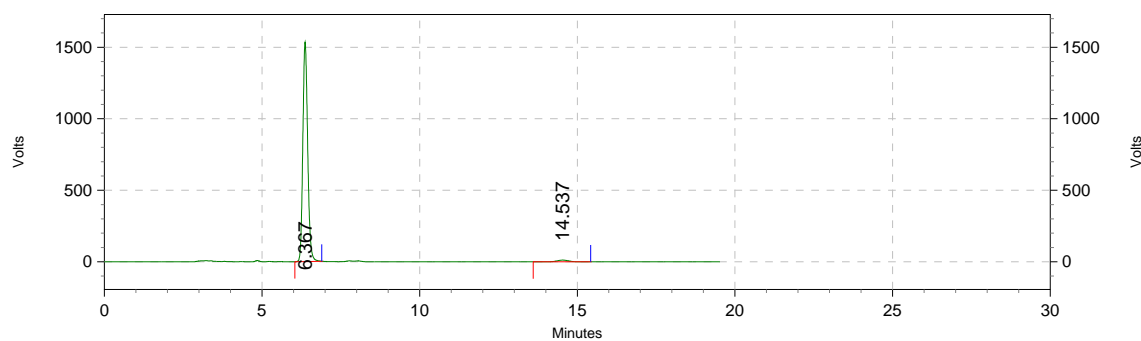

| Peaks | Ret. Time | Area     | Area%  |
|-------|-----------|----------|--------|
| 1     | 6.367     | 16395031 | 98.147 |
| 2     | 14.537    | 309501   | 1.853  |

**(S)-tert-butyl -(1-benzyl-2-oxo-3-propoxyindolin-3-yl)carbamate (3f)**

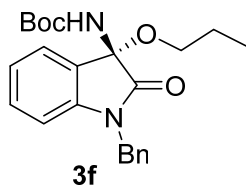

White solid, 90% yield, 90% ee, mp 120-122 °C.  $[\alpha]_D^{20} = -7.181$  (c = 1.30, CH<sub>2</sub>Cl<sub>2</sub>). <sup>1</sup>H NMR (400 MHz, CDCl<sub>3</sub>) δ 7.67 (d, J = 5.6 Hz, 1H), 7.32 (d, J = 8.9 Hz, 4H), 7.27 – 7.18 (m, 2H), 7.07 (t, J = 7.1 Hz, 1H), 6.71 (d, J = 7.5 Hz, 1H), 5.61 (s, 1H), 5.01 (d, J = 15.6 Hz, 1H), 4.82 (d, J = 15.5 Hz, 1H), 3.43 – 3.33 (m, 2H), 1.55 (q, J = 6.6 Hz, 2H), 1.34 (s, 9H), 0.86 (t, J = 6.8 Hz, 3H). <sup>13</sup>C {<sup>1</sup>H} NMR (100 MHz, CDCl<sub>3</sub>) δ 172.7, 153.2, 143.0, 135.4, 130.3, 128.8, 127.7, 127.3, 126.3, 125.8, 123.1, 109.5, 84.4, 80.5, 65.6, 43.9, 28.2, 22.9, 10.5. HRMS-ESI(m/z): [M+Na]<sup>+</sup> calcd for C<sub>23</sub>H<sub>28</sub>N<sub>2</sub>NaO<sub>4</sub><sup>+</sup> 419.1941, found 419.1945. The ee value was determined by chiral HPLC analysis (Chiralcel IA, hexane/i-PrOH = 70/30 flow rate = 1.0 mL/min, λ = 220 nm). Retention times: t<sub>R</sub> = 5.1 min for (*S*)-isomer and t<sub>R</sub> = 13.0 min for (*R*)-isomer.

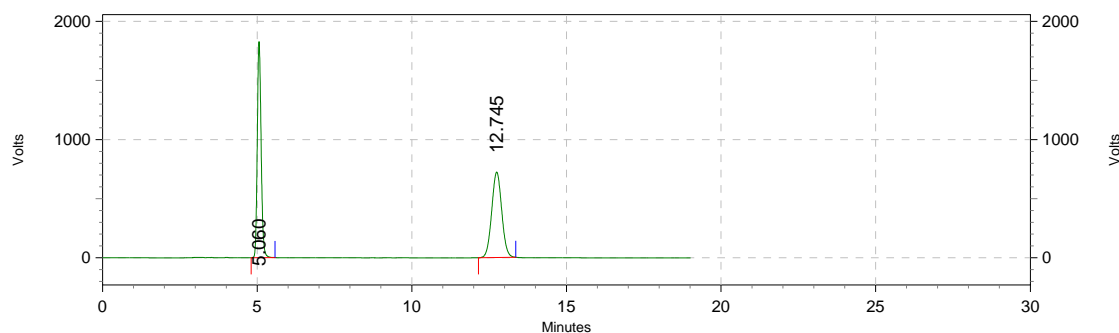

| Peaks | Ret. Time | Area     | Area%  |
|-------|-----------|----------|--------|
| 1     | 5.060     | 15705935 | 49.145 |
| 2     | 12.745    | 16252137 | 50.855 |

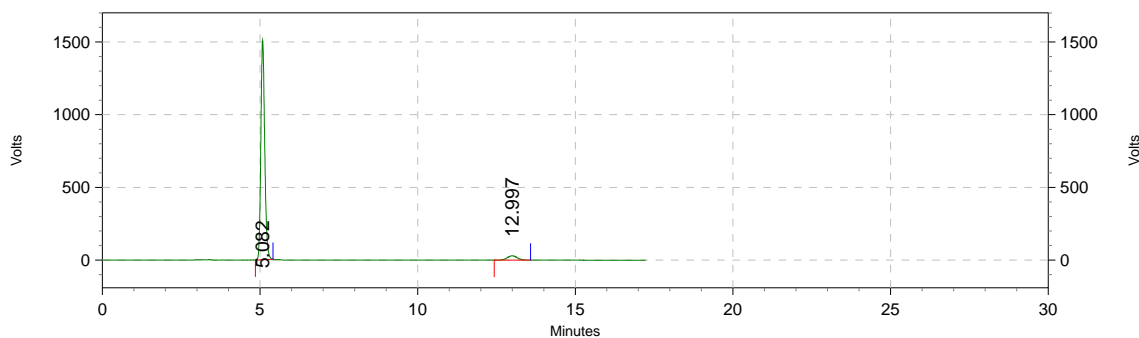

| Peaks | Ret. Time | Area     | Area%  |
|-------|-----------|----------|--------|
| 1     | 5.082     | 12873804 | 95.007 |
| 2     | 12.997    | 676608   | 4.993  |

**(S)-tert-butyl-(1-benzyl-3-isopropoxy-2-oxoindolin-3-yl)carbamate (3g)**

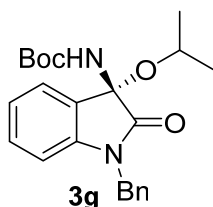

White solid, 70% yield, 83% ee, mp 103-105 °C.  $[\alpha]_D^{20} = +1.025$  (c = 1.00, CH<sub>2</sub>Cl<sub>2</sub>). <sup>1</sup>H NMR (400 MHz, CDCl<sub>3</sub>) δ 7.74 (d, J = 6.4 Hz, 1H), 7.32 (d, J = 6.6 Hz, 4H), 7.23 (dd, J = 15.2, 7.4 Hz, 2H), 7.06 (t, J = 7.6 Hz, 1H), 6.71 (d, J = 7.8 Hz, 1H), 5.55 (s, 1H), 5.06 (d, J = 15.7 Hz, 1H), 4.77 (d, J = 15.7 Hz, 1H), 4.08 (p, J = 6.1 Hz, 1H), 1.35 (s, 9H), 1.12 (d, J = 6.2 Hz, 3H), 1.05 (d, J = 6.1 Hz, 3H). <sup>13</sup>C {<sup>1</sup>H} NMR (100 MHz, CDCl<sub>3</sub>) δ 173.2, 153.2, 142.7, 135.4, 130.2, 128.8, 127.7, 127.3, 127.0, 126.1, 123.1, 109.4, 83.8, 80.5, 67.1, 43.9, 28.2, 23.8, 23.6. HRMS-ESI(m/z): [M+Na]<sup>+</sup> calcd for C<sub>23</sub>H<sub>28</sub>N<sub>2</sub>NaO<sub>4</sub><sup>+</sup> 419.1941, found 419.1942. The ee value was determined by chiral HPLC analysis (Chiralcel IA, hexane/i-PrOH = 70/30 flow rate = 1.0 mL/min, λ = 220 nm). Retention times: t<sub>R</sub> = 4.8 min for (S)-isomer and t<sub>R</sub> = 7.8 min for (R)-isomer.

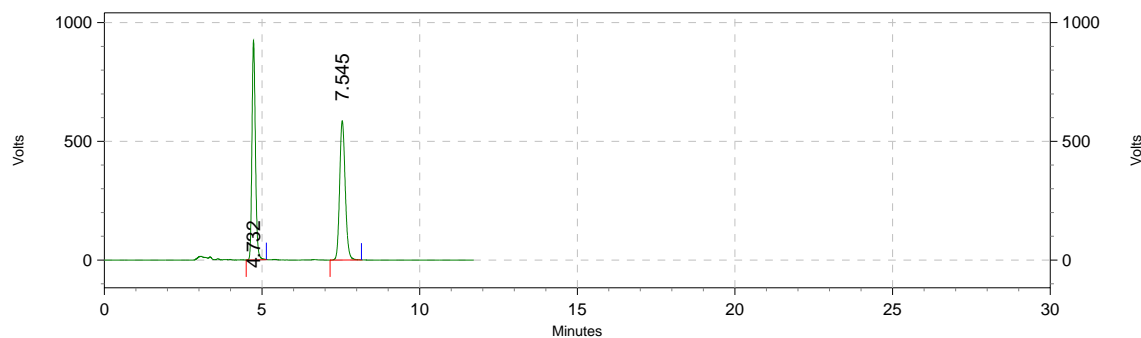

| Peaks | Ret. Time | Area    | Area%  |
|-------|-----------|---------|--------|
| 1     | 4.732     | 7076195 | 49.668 |
| 2     | 7.545     | 7170911 | 50.332 |

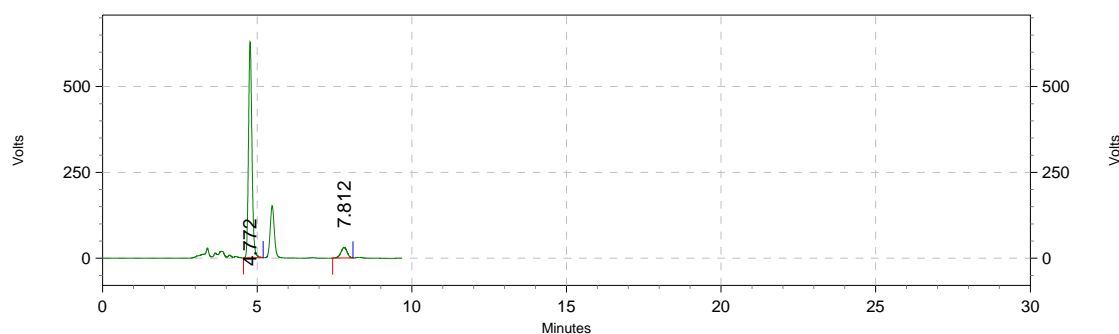

| Peaks | Ret. Time | Area    | Area%  |
|-------|-----------|---------|--------|
| 1     | 4.772     | 4880791 | 91.968 |
| 2     | 7.812     | 426241  | 8.032  |

**(S)-tert-butyl-(1-benzyl-3-butoxy-2-oxindolin-3-yl)carbamate (3h)**

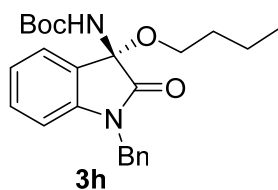

White solid, 92% yield, 95% ee, mp 113-115 °C.  $[\alpha]_D^{20} = -11.74$  (c = 1.00, CH<sub>2</sub>Cl<sub>2</sub>). <sup>1</sup>H NMR (400 MHz, CDCl<sub>3</sub>) δ 7.67 (d, J = 6.0 Hz, 1H), 7.32 (d, J = 8.2 Hz, 4H), 7.24 (dt, J = 15.2, 6.6 Hz, 2H), 7.07 (t, J = 7.3 Hz, 1H), 6.71 (d, J = 7.6 Hz, 1H), 5.58 (s, 1H), 5.02 (d, J = 15.7 Hz, 1H), 4.82 (d, J = 15.6 Hz, 1H), 3.41 (q, J = 6.7 Hz, 2H), 1.54 – 1.74 (m, 2H), 1.34 (s, 9H), 0.84 (t, J = 7.2 Hz, 3H). <sup>13</sup>C {<sup>1</sup>H} NMR (100 MHz, CDCl<sub>3</sub>) δ 172.7, 153.2, 143.0, 130.3, 128.8, 127.7, 127.3, 126.3, 125.8, 123.1, 109.4, 84.4, 80.5, 63.7, 43.9, 31.6, 28.2, 19.1, 13.8.

HRMS-ESI(m/z):  $[M+Na]^+$  calcd for  $C_{24}H_{30}N_2NaO_4^+$  433.2098, found 433.2101. The ee value was determined by chiral HPLC analysis (Chiralcel IA, hexane/i-PrOH = 70/30 flow rate = 1.0 mL/min,  $\lambda = 220$  nm). Retention times:  $t_R = 5.1$  min for (*S*)-isomer and  $t_R = 18.3$  min for (*R*)-isomer.

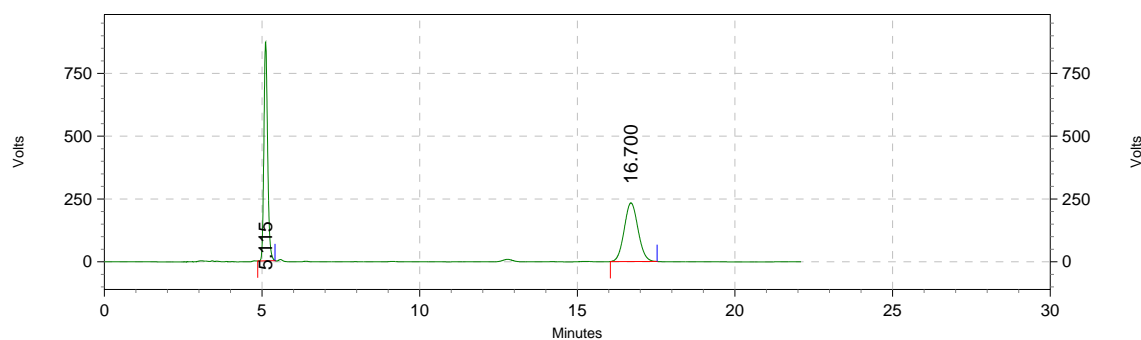

| Peaks | Ret. Time | Area    | Area%  |
|-------|-----------|---------|--------|
| 1     | 5.115     | 7208217 | 50.372 |
| 2     | 16.700    | 7101871 | 49.628 |

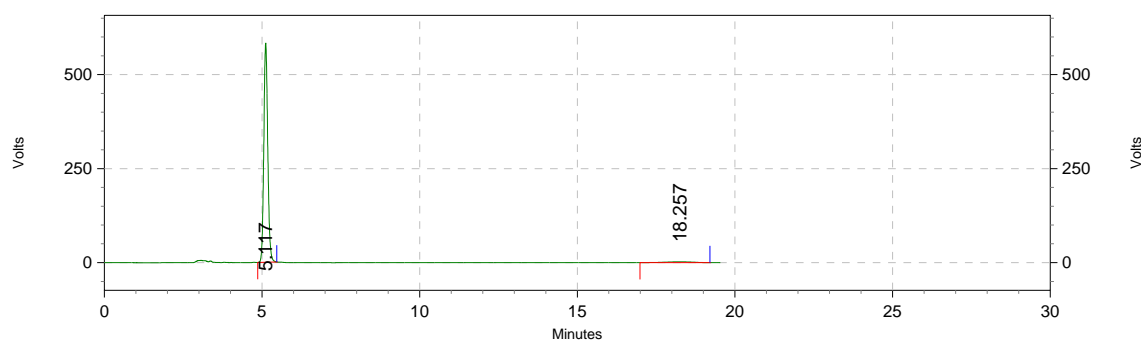

| Peaks | Ret. Time | Area    | Area%  |
|-------|-----------|---------|--------|
| 1     | 5.117     | 5086932 | 97.626 |
| 2     | 18.257    | 123716  | 2.374  |

**(*S*)-tert-butyl-(1-benzyl-3-(benzyloxy)-2-oxindolin-3-yl)carbamate (**3i**)<sup>8</sup>**

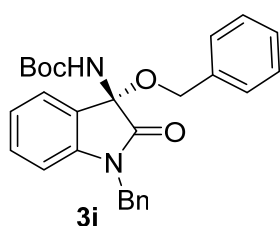

White solid, 90% yield, 89% ee mp 110-112 °C.  $[\alpha]_D^{20} = +0.434$  (c = 1.20,  $CH_2Cl_2$ ).  $^1H$  NMR



(400 MHz, CDCl<sub>3</sub>) δ 7.81 (d, J = 6.9 Hz, 1H), 7.31 (d, J = 6.5 Hz, 4H), 7.29 – 7.20 (m, 7H), 7.08 (t, J = 7.5 Hz, 1H), 6.71 (d, J = 7.9 Hz, 1H), 5.70 (s, 1H), 4.96 (d, J = 15.7 Hz, 1H), 4.84 (d, J = 15.7 Hz, 1H), 4.60 – 4.51 (m, 2H), 1.36 (s, 9H). <sup>13</sup>C {<sup>1</sup>H} NMR (100 MHz, CDCl<sub>3</sub>) δ 172.4, 153.3, 142.9, 137.2, 135.3, 130.5, 128.9, 128.3, 128.0, 127.8, 127.8, 127.3, 126.4, 126.2, 123.3, 109.6, 84.4, 80.7, 66.1, 44.0, 29.7, 28.2. The ee value was determined by chiral HPLC analysis (Chiralcel IA, hexane/i-PrOH = 70/30 flow rate = 1.0 mL/min, λ = 220 nm). Retention times: t<sub>R</sub> = 6.8 min for (*S*)-isomer and t<sub>R</sub> = 18.6 min for (*R*)-isomer.

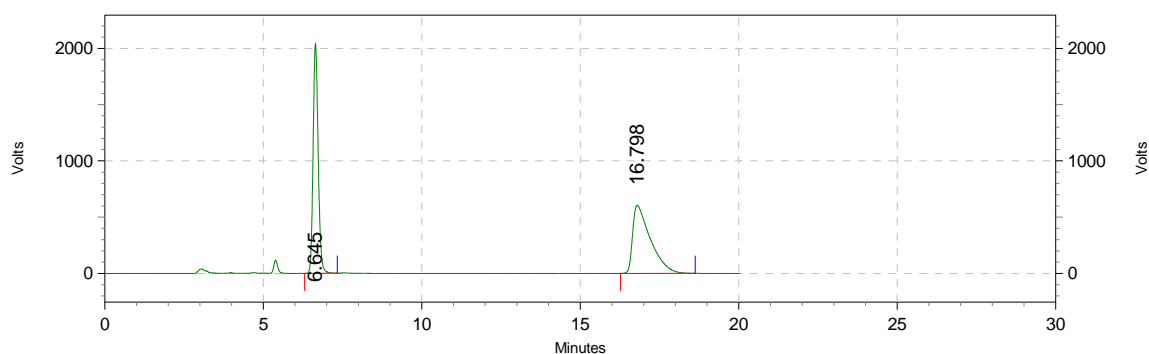

| Peaks | Ret. Time | Area     | Area%  |
|-------|-----------|----------|--------|
| 1     | 6.645     | 22754903 | 49.191 |
| 2     | 16.798    | 23503093 | 50.809 |

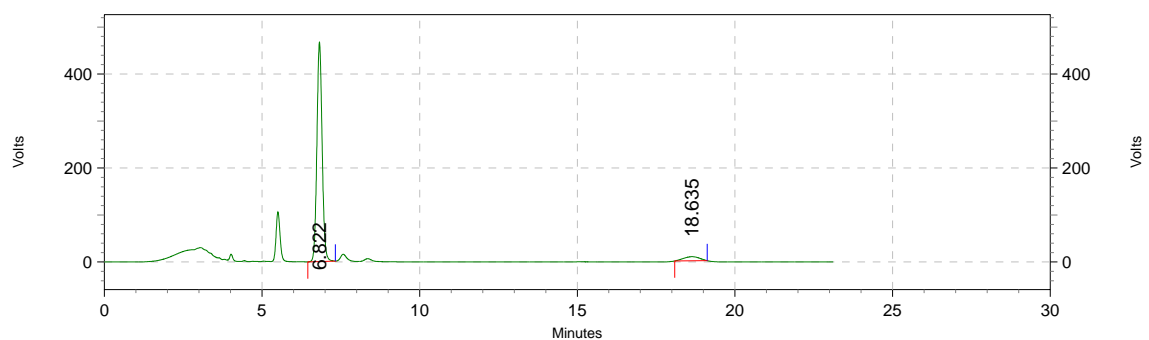

| Peaks | Ret. Time | Area    | Area%  |
|-------|-----------|---------|--------|
| 1     | 6.822     | 5379906 | 94.623 |
| 2     | 18.635    | 305721  | 5.377  |

**(S)-tert-butyl-(1-benzyl-3-(but-3-en-1-yloxy)-2-oxoindolin-3-yl)carbamate (3j)**

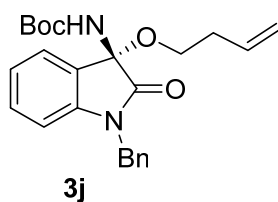

White solid, 96% yield, 97% ee, mp 100-102 °C.  $[\alpha]_D^{20} = -3.315$  ( $c = 1.20$ ,  $\text{CH}_2\text{Cl}_2$ ).  $^1\text{H}$  NMR (400 MHz,  $\text{CDCl}_3$ )  $\delta$  7.67 (d,  $J = 7.0$  Hz, 1H), 7.32 (t,  $J = 8.3$  Hz, 4H), 7.26 – 7.18 (m, 2H), 7.06 (t,  $J = 7.5$  Hz, 1H), 6.70 (d,  $J = 7.8$  Hz, 1H), 5.74 (dd,  $J = 17.0, 10.2, 6.7$  Hz, 1H), 5.64 (s, 1H), 5.02 (dd,  $J = 15.6, 9.9$  Hz, 3H), 4.81 (d,  $J = 15.7$  Hz, 1H), 3.49 (t,  $J = 6.8$  Hz, 2H), 2.29 (q,  $J = 6.8$  Hz, 2H), 1.34 (s, 9H).  $^{13}\text{C}$   $\{^1\text{H}\}$  NMR (100 MHz,  $\text{CDCl}_3$ )  $\delta$  172.5, 153.3, 142.9, 135.4, 134.6, 130.4, 128.8, 127.7, 127.3, 126.2, 125.9, 123.2, 116.8, 109.5, 84.4, 80.6, 63.4, 43.9, 34.0, 28.2. HRMS-ESI( $m/z$ ):  $[\text{M}+\text{Na}]^+$  calcd for  $\text{C}_{24}\text{H}_{28}\text{N}_2\text{NaO}_4^+$  431.1941, found 431.1946. The ee value was determined by chiral HPLC analysis (Chiralcel IA, hexane/*i*-PrOH = 80/20 flow rate = 1.0 mL/min,  $\lambda = 220$  nm). Retention times:  $t_R = 6.2$  min for (*S*)-isomer and  $t_R = 23.4$  min for (*R*)-isomer.

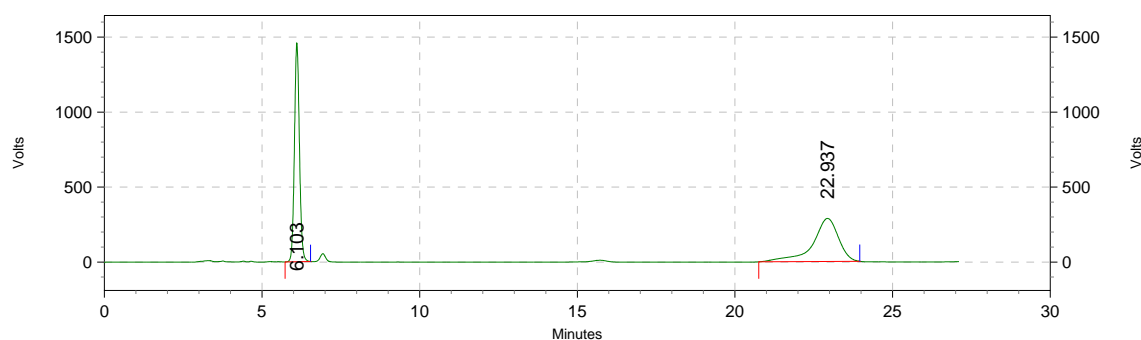

| Peaks | Ret. Time | Area     | Area%  |
|-------|-----------|----------|--------|
| 1     | 6.103     | 16102483 | 49.752 |
| 2     | 22.937    | 16262858 | 50.248 |

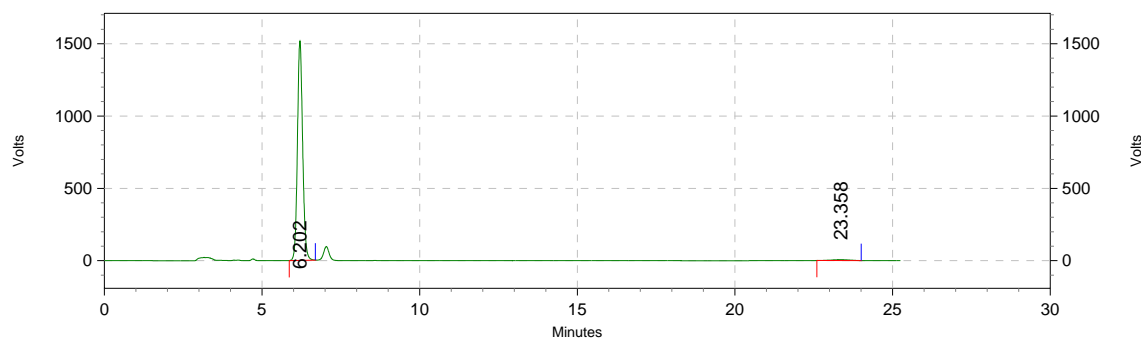

| Peaks | Ret. Time | Area     | Area%  |
|-------|-----------|----------|--------|
| 1     | 6.202     | 17509036 | 98.651 |
| 2     | 23.358    | 239508   | 1.349  |

**(S)-tert-butyl-(1-benzyl-2-oxo-3-((4-(trifluoromethyl)benzyl)oxy)indolin-3-yl)carbamate**  
**(3k)**

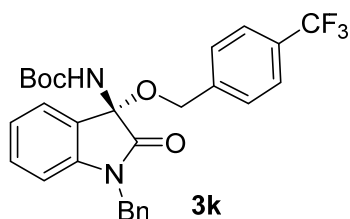

White solid, 97% yield, 90% ee, mp 136-138 °C.  $[\alpha]_D^{20} = -9.063$  ( $c = 1.20$ ,  $\text{CH}_2\text{Cl}_2$ ).  $^1\text{H}$  NMR (400 MHz,  $\text{CDCl}_3$ )  $\delta$  7.88 (d,  $J = 6.3$  Hz, 1H), 7.53 (d,  $J = 7.9$  Hz, 2H), 7.40 (d,  $J = 7.8$  Hz, 2H), 7.36 – 7.20 (m, 6H), 7.08 (t,  $J = 7.5$  Hz, 1H), 6.74 (d,  $J = 7.8$  Hz, 1H), 5.89 (s, 1H), 4.95 (d,  $J = 15.7$  Hz, 1H), 4.83 (d,  $J = 15.7$  Hz, 1H), 4.68 (s, 2H), 1.37 (s, 9H).  $^{13}\text{C}$   $\{^1\text{H}\}$  NMR (100 MHz,  $\text{CDCl}_3$ )  $\delta$  172.2, 153.4, 142.7, 141.5, 135.2, 130.6, 129.8 (q,  $^2J_{\text{C-F}} = 32.5$  Hz), 128.9, 127.9, 127.3, 126.8, 126.7, 126.2, 125.2 (q,  $^3J_{\text{C-F}} = 3.7$  Hz), 124.2 (q,  $^1J_{\text{C-F}} = 272.0$  Hz), 123.5, 84.3, 80.9, 65.2, 44.0, 28.2.  $^{19}\text{F}$  NMR ( $\text{CDCl}_3$ )  $\delta$  -62.5. HRMS-ESI ( $m/z$ ):  $[\text{M}+\text{Na}]^+$  calcd for  $\text{C}_{28}\text{H}_{27}\text{F}_3\text{N}_2\text{NaO}_4^+$  535.1815, found 535.1821. The ee value was determined by chiral HPLC analysis (Chiralcel IA, hexane/*i*-PrOH = 70/30 flow rate = 1.0 mL/min,  $\lambda = 220$  nm). Retention times:  $t_R = 6.7$  min for (*S*)-isomer and  $t_R = 25.4$  min for (*R*)-isomer.

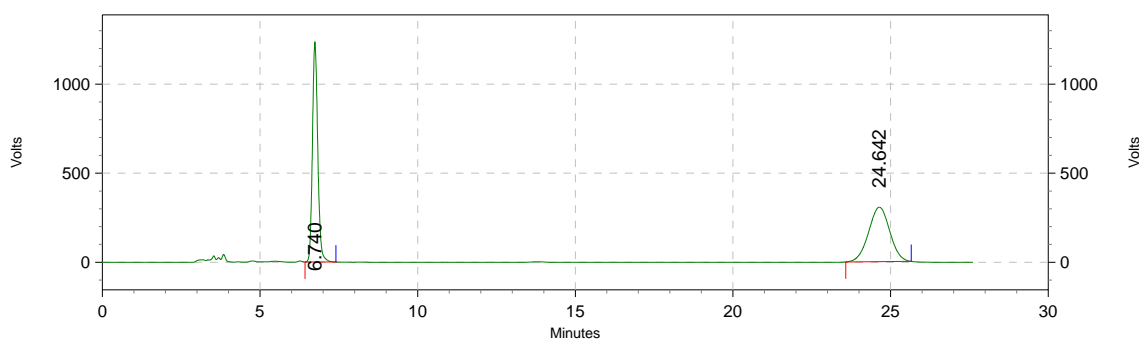

| Peaks | Ret. Time | Area     | Area%  |
|-------|-----------|----------|--------|
| 1     | 6.740     | 14520761 | 50.492 |
| 2     | 24.642    | 14237872 | 49.508 |

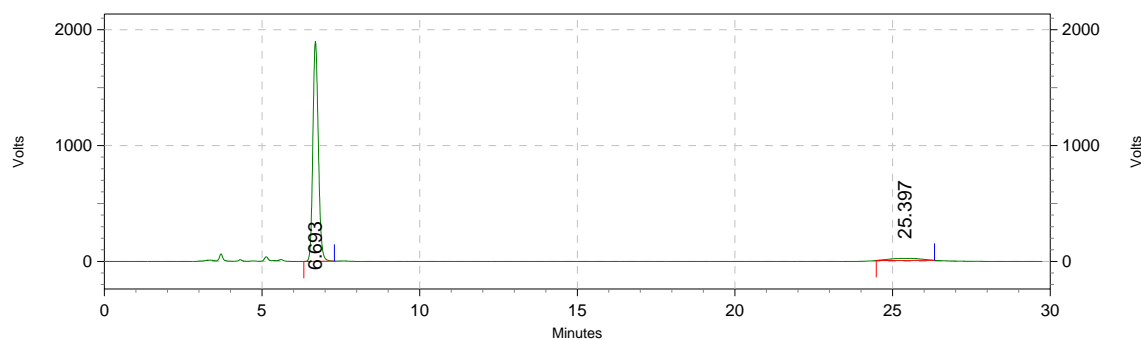

| Peaks | Ret. Time | Area     | Area%  |
|-------|-----------|----------|--------|
| 1     | 6.693     | 22861263 | 95.002 |
| 2     | 25.397    | 1202779  | 4.998  |

**(S)-tert-butyl-(1-benzyl-3-(cinnamyloxy)-2-oxoindolin-3-yl)carbamate (3l)**

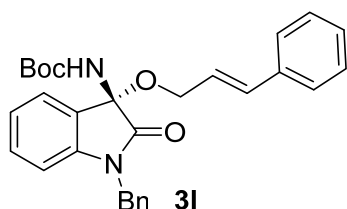

White solid, 94% yield, 93% ee, mp 106-108 °C.  $[\alpha]_D^{20} = -7.66$  ( $c = 1.00$ ,  $\text{CH}_2\text{Cl}_2$ ).  $^1\text{H}$  NMR (400 MHz,  $\text{CDCl}_3$ )  $\delta$  7.81 (d,  $J = 5.9$  Hz, 1H), 7.30 (d,  $J = 11.3$  Hz, 9H), 7.23 (d,  $J = 7.0$  Hz, 2H), 7.09 (t,  $J = 7.3$  Hz, 1H), 6.71 (d,  $J = 7.5$  Hz, 1H), 6.49 (d,  $J = 15.9$  Hz, 1H), 6.26 – 6.16 (m, 1H), 5.67 (s, 1H), 4.91 (d,  $J = 16.7$  Hz, 2H), 4.22 (d,  $J = 5.7$  Hz, 2H), 1.37 (s, 9H).  $^{13}\text{C}$   $\{^1\text{H}\}$  NMR (100 MHz,  $\text{CDCl}_3$ )  $\delta$  172.5, 153.3, 142.8, 136.5, 135.3, 132.9, 130.5, 128.9, 128.5, 127.8, 127.3, 126.6, 126.4, 126.1, 125.0, 123.3, 109.6, 84.2, 80.7, 65.1, 44.0, 28.2. HRMS-ESI ( $m/z$ ):  $[\text{M}+\text{Na}]^+$  calcd for  $\text{C}_{29}\text{H}_{30}\text{N}_2\text{NaO}_4^+$  493.2098, found 493.2101. The ee value was determined by chiral HPLC analysis (Chiralcel IA, hexane/*i*-PrOH = 70/30 flow rate = 1.0 mL/min,  $\lambda = 220$  nm). Retention times:  $t_R = 8.0$  min for (*S*)-isomer and  $t_R = 28.9$  min for (*R*)-isomer.

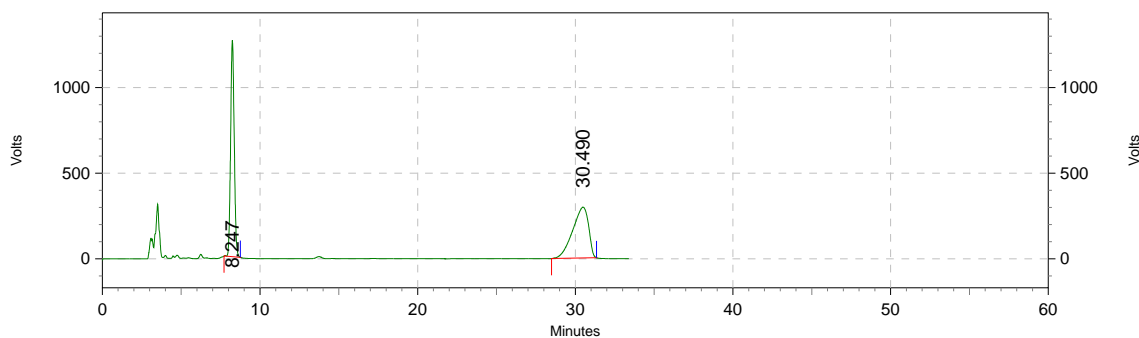

| Peaks | Ret. Time | Area     | Area%  |
|-------|-----------|----------|--------|
| 1     | 8.247     | 20259718 | 49.323 |
| 2     | 30.490    | 20815772 | 50.677 |

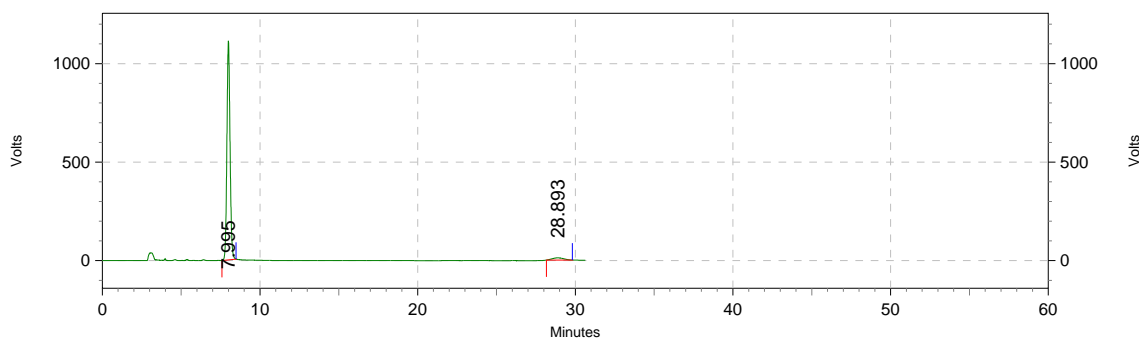

| Peaks | Ret. Time | Area     | Area%  |
|-------|-----------|----------|--------|
| 1     | 7.995     | 15504999 | 96.489 |
| 2     | 28.893    | 564178   | 3.511  |

**(S)-tert-butyl-(1-benzyl-5-chloro-3-ethoxy-2-oxoindolin-3-yl)carbamate (3m)**

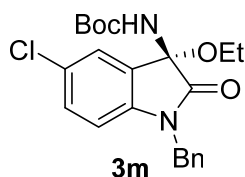

White solid, 98% yield, 99% ee, mp 165-167 °C.  $[\alpha]_D^{20} = +9.98$  (c = 1.20, CH<sub>2</sub>Cl<sub>2</sub>). <sup>1</sup>H NMR (400 MHz, CDCl<sub>3</sub>) δ 7.70 – 7.65 (m, 1H), 7.35 – 7.27 (m, 5H), 7.19 (dd, J = 8.4, 2.2 Hz, 1H), 6.61 (d, J = 8.3 Hz, 1H), 5.57 (s, 1H), 4.98 – 4.82 (m, 2H), 3.52 (q, J = 7.0 Hz, 2H), 1.38 (s, 9H), 1.17 (t, J = 7.0 Hz, 3H). <sup>13</sup>C {<sup>1</sup>H} NMR (100 MHz, CDCl<sub>3</sub>) δ 172.3, 153.2, 141.4, 134.9, 127.9, 127.2, 126.2, 110.5, 84.2, 80.9, 59.8, 44.1, 28.2, 15.2. HRMS-ESI (m/z): [M+Na]<sup>+</sup> calcd for C<sub>22</sub>H<sub>25</sub>ClN<sub>2</sub>NaO<sub>4</sub><sup>+</sup> 439.1395, found 439.1400. The ee value was determined by

chiral HPLC analysis (Chiralcel IA, hexane/i-PrOH = 70/30 flow rate = 1.0 mL/min,  $\lambda = 220$  nm). Retention times:  $t_R = 4.7$  min for (*S*)-isomer and  $t_R = 11.4$  min for (*R*)-isomer.

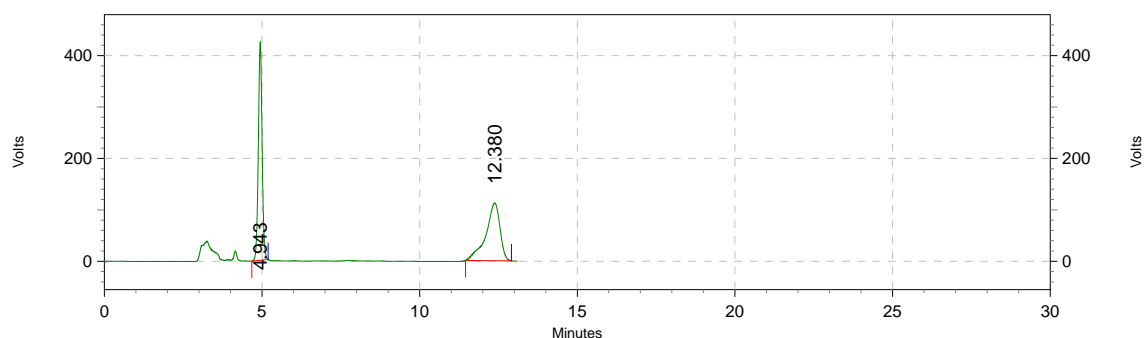

| Peaks | Ret. Time | Area    | Area%  |
|-------|-----------|---------|--------|
| 1     | 4.943     | 3524071 | 50.390 |
| 2     | 12.380    | 3469545 | 49.610 |

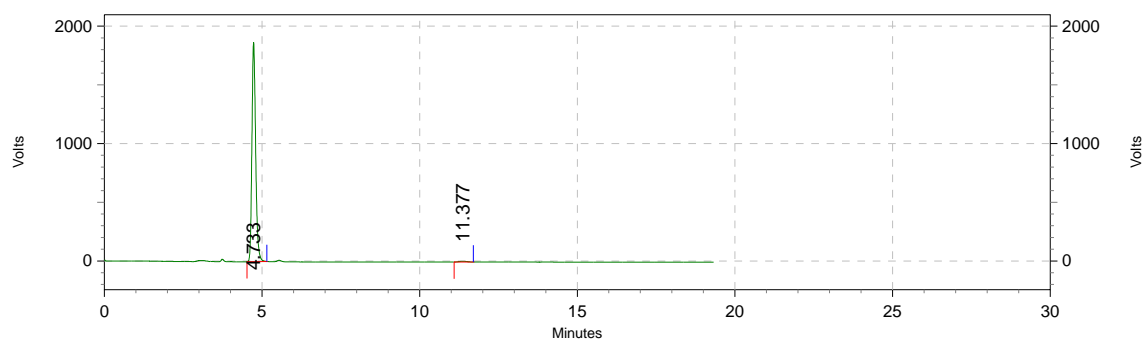

| Peaks | Ret. Time | Area     | Area%  |
|-------|-----------|----------|--------|
| 1     | 4.733     | 15443537 | 99.277 |
| 2     | 11.377    | 112431   | 0.723  |

**(*S*)-tert-butyl-(1-benzyl-6-chloro-3-ethoxy-2-oxindolin-3-yl)carbamate (3n)**

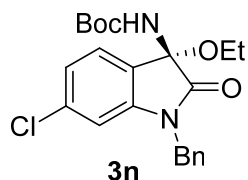

White solid, 97% yield, 97% ee, mp 148-150 °C.  $[\alpha]_D^{20} = -7.13$  (c = 1.0, CH<sub>2</sub>Cl<sub>2</sub>). <sup>1</sup>H NMR (400 MHz, CDCl<sub>3</sub>)  $\delta$  7.61 (d, J = 7.9 Hz, 1H), 7.33 (d, J = 3.0 Hz, 5H), 7.04 (dd, J = 8.0, 1.8

Hz, 1H), 6.70 (d, J = 1.6 Hz, 1H), 5.60 (s, 1H), 4.95 (d, J = 15.8 Hz, 1H), 4.83 (d, J = 15.8 Hz, 1H), 3.49 (q, J = 7.0 Hz, 2H), 1.36 (s, 9H), 1.16 (t, J = 7.0 Hz, 3H).  $^{13}\text{C}$   $\{^1\text{H}\}$  NMR (100 MHz,  $\text{CDCl}_3$ )  $\delta$  172.7, 153.3, 144.2, 136.1, 134.8, 129.0, 127.9, 127.2, 126.9, 124.7, 123.1, 110.1, 83.9, 80.8, 59.8, 44.1, 28.2, 15.2. HRMS-ESI (m/z):  $[\text{M}+\text{Na}]^+$  calcd for  $\text{C}_{22}\text{H}_{25}\text{ClN}_2\text{NaO}_4^+$  439.1395, found 439.1397. The ee value was determined by chiral HPLC analysis (Chiralcel IA, hexane/i-PrOH = 70/30 flow rate = 1.0 mL/min,  $\lambda$  = 220 nm). Retention times:  $t_{\text{R}}$  = 4.7 min for (*S*)-isomer and  $t_{\text{R}}$  = 9.0 min for (*R*)-isomer.

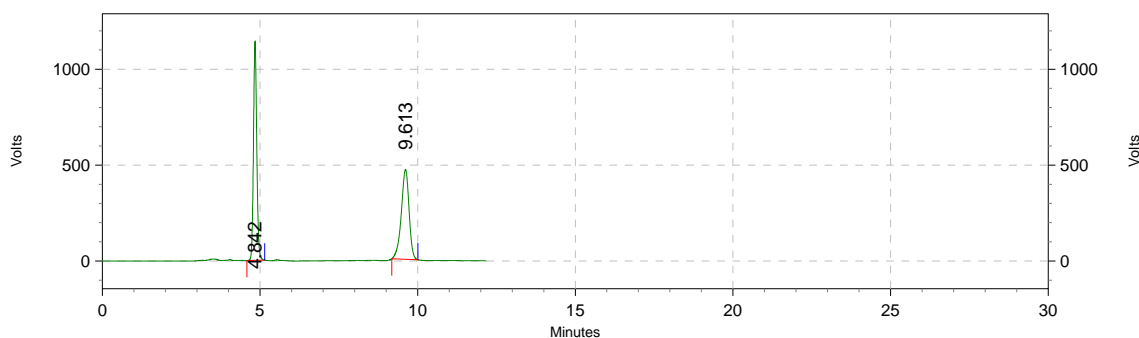

| Peaks | Ret. Time | Area    | Area%  |
|-------|-----------|---------|--------|
| 1     | 4.842     | 8308036 | 50.914 |
| 2     | 9.613     | 8009738 | 49.086 |

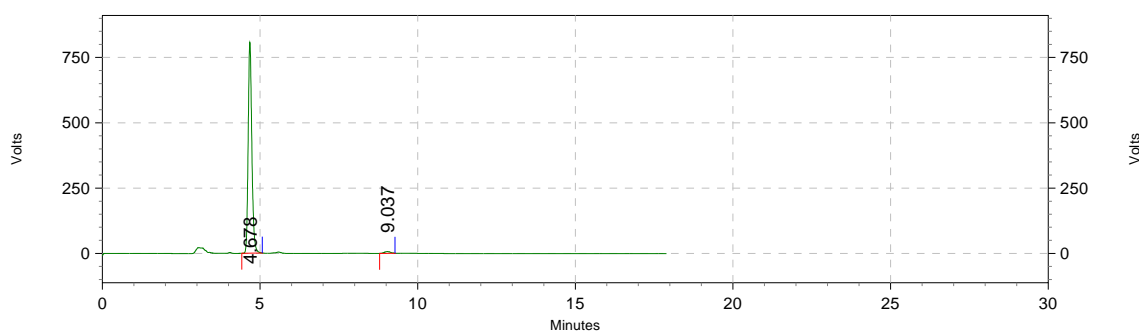

| Peaks | Ret. Time | Area    | Area%  |
|-------|-----------|---------|--------|
| 1     | 4.678     | 6541220 | 98.647 |
| 2     | 9.037     | 89688   | 1.353  |

**(S)-tert-butyl-(1-benzyl-7-chloro-3-ethoxy-2-oxindolin-3-yl)carbamate (3o)**

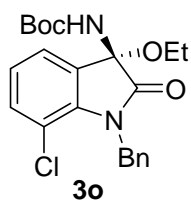

White solid, 97% yield, 99% ee, mp 143-145 °C.  $[\alpha]_D^{20} = -7.13$  (c = 1.0, CH<sub>2</sub>Cl<sub>2</sub>). <sup>1</sup>H NMR (400 MHz, CDCl<sub>3</sub>) δ 7.55 (d, J = 7.1 Hz, 1H), 7.30 (d, J = 4.4 Hz, 4H), 7.22 (td, J = 8.3, 2.7 Hz, 2H), 7.05 – 7.00 (m, 1H), 5.54 (s, 1H), 5.35 (d, J = 3.2 Hz, 2H), 3.49 (q, J = 7.0 Hz, 2H), 1.35 (s, 9H), 1.15 (t, J = 7.0 Hz, 3H). <sup>13</sup>C {<sup>1</sup>H} NMR (100 MHz, CDCl<sub>3</sub>) δ 173.3, 153.1, 139.1, 137.2, 133.0, 129.6, 128.6, 127.2, 126.5, 124.1, 123.9, 115.8, 83.6, 80.9, 59.8, 45.1, 28.1, 15.2. HRMS-ESI (m/z): [M+Na]<sup>+</sup> calcd for C<sub>22</sub>H<sub>25</sub>ClN<sub>2</sub>NaO<sub>4</sub><sup>+</sup> 439.1395, found 439.1400. The ee value was determined by chiral HPLC analysis (Chiralcel IA, hexane/i-PrOH = 70/30 flow rate = 1.0 mL/min, λ = 220 nm). Retention times: t<sub>R</sub> = 4.9 min for (S)-isomer and t<sub>R</sub> = 13.0 min for (R)-isomer.

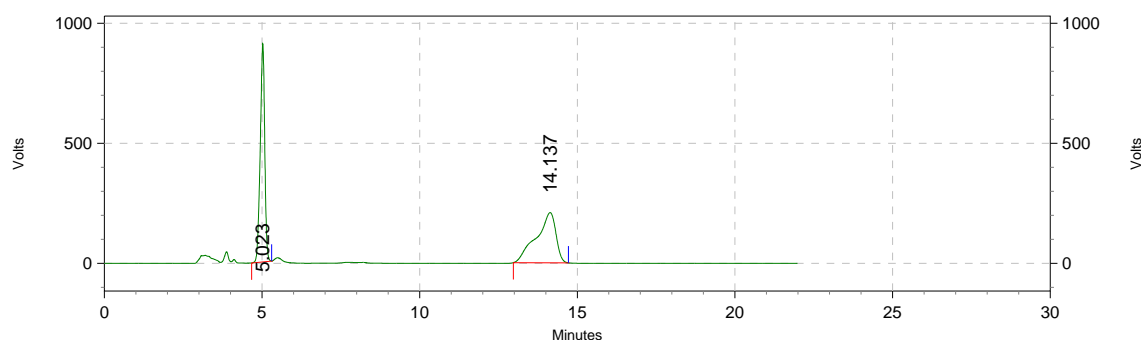

| Peaks | Ret. Time | Area    | Area%  |
|-------|-----------|---------|--------|
| 1     | 5.023     | 9056216 | 50.124 |
| 2     | 14.137    | 9011238 | 49.876 |

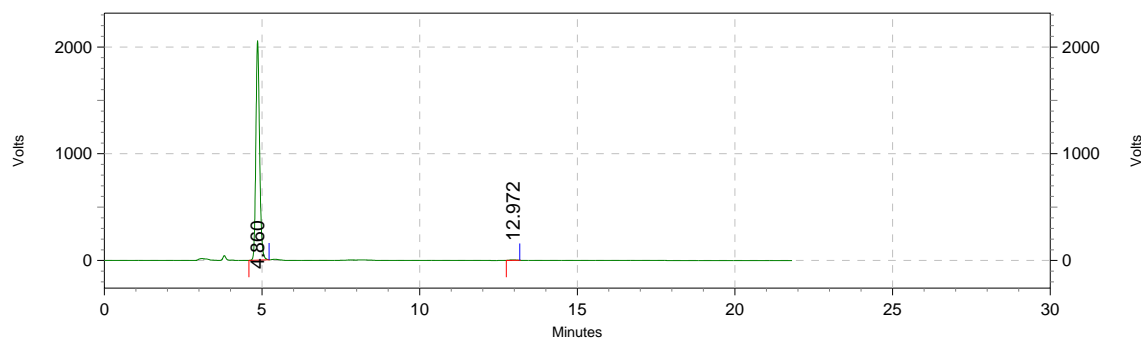



| Peaks | Ret. Time | Area     | Area%  |
|-------|-----------|----------|--------|
| 1     | 4.860     | 16841351 | 99.716 |
| 2     | 12.972    | 47945    | 0.284  |

**(S)-tert-butyl-(1-benzyl-5-bromo-3-ethoxy-2-oxindolin-3-yl)carbamate (3p)**

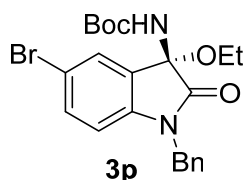

White solid, 96% yield, 99% ee, mp 170-172 °C.  $[\alpha]_D^{20} = +7.86$  (c = 1.40, CH<sub>2</sub>Cl<sub>2</sub>). <sup>1</sup>H NMR (400 MHz, CDCl<sub>3</sub>) δ 7.83 – 7.77 (m, 1H), 7.35 – 7.27 (m, 6H), 6.56 (d, J = 8.3 Hz, 1H), 5.55 (s, 1H), 4.95 (d, J = 15.8 Hz, 1H), 4.85 (d, J = 15.8 Hz, 1H), 3.52 (q, J = 7.0 Hz, 2H), 1.38 (s, 9H), 1.17 (t, J = 7.0 Hz, 3H). <sup>13</sup>C {<sup>1</sup>H} NMR (100 MHz, CDCl<sub>3</sub>) δ 172.1, 153.2, 141.9, 134.9, 133.1, 128.9, 128.9, 128.4, 127.9, 127.2, 116.1, 111.0, 84.1, 80.9, 59.8, 44.0, 28.2, 15.2. HRMS-ESI (m/z): [M+Na]<sup>+</sup> calcd for C<sub>22</sub>H<sub>25</sub>BrN<sub>2</sub>NaO<sub>4</sub><sup>+</sup> 483.0890, found 483.0896. The ee value was determined by chiral HPLC analysis (Chiralcel IA, hexane/i-PrOH = 70/30 flow rate = 1.0 mL/min, λ = 220 nm). Retention times: t<sub>R</sub> = 5.0 min for (*S*)-isomer and t<sub>R</sub> = 12.6 min for (*R*)-isomer.

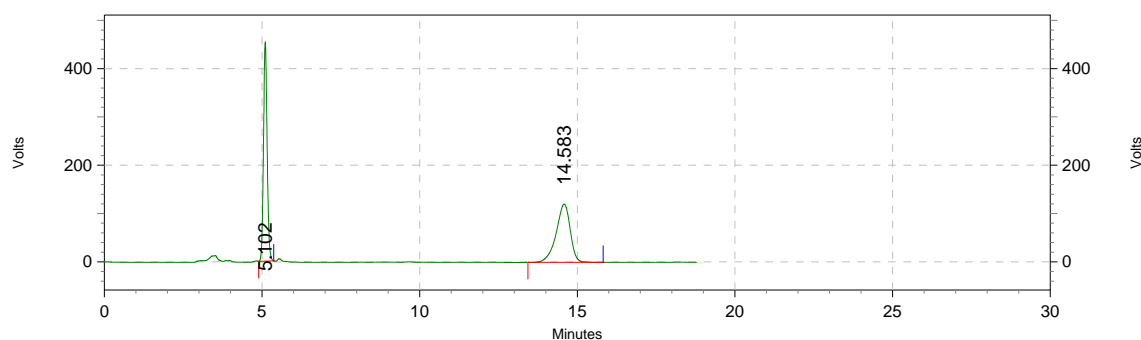

| Peaks | Ret. Time | Area    | Area%  |
|-------|-----------|---------|--------|
| 1     | 5.102     | 3651149 | 49.373 |
| 2     | 14.583    | 3743865 | 50.627 |

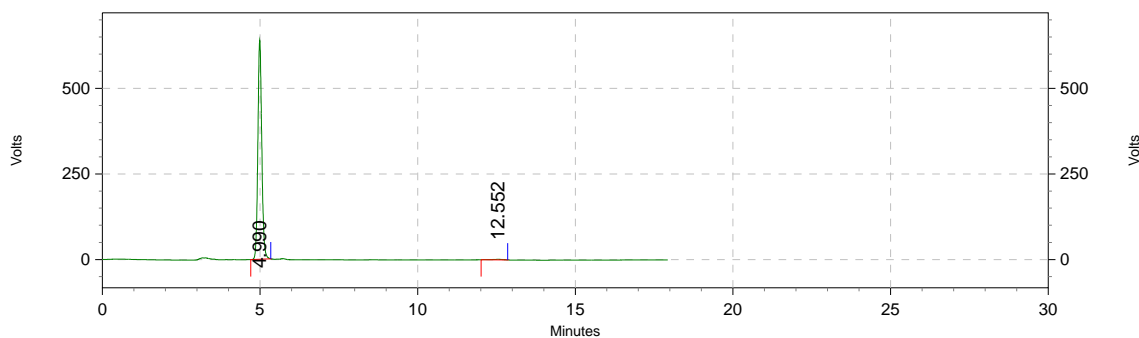

| Peaks | Ret. Time | Area    | Area%  |
|-------|-----------|---------|--------|
| 1     | 4.990     | 5515995 | 99.303 |
| 2     | 12.552    | 38714   | 0.697  |

**(S)-tert-butyl-(1-benzyl-6-bromo-3-ethoxy-2-oxindolin-3-yl)carbamate (3q)**

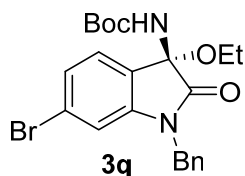

White solid, 96% yield, 99% ee, mp 141-143 °C.  $[\alpha]_D^{20} = -2.81$  ( $c = 1.10$ ,  $\text{CH}_2\text{Cl}_2$ ).  $^1\text{H}$  NMR (400 MHz,  $\text{CDCl}_3$ )  $\delta$  7.55 (d,  $J = 7.8$  Hz, 1H), 7.31 (d,  $J = 10.0$  Hz, 5H), 7.22 – 7.19 (m, 1H), 6.86 – 6.83 (m, 1H), 5.61 (s, 1H), 4.94 (d,  $J = 15.8$  Hz, 1H), 4.83 (d,  $J = 15.8$  Hz, 1H), 3.49 (q,  $J = 7.0$  Hz, 2H), 1.36 (s, 9H), 1.15 (t,  $J = 7.0$  Hz, 3H).  $^{13}\text{C}$   $\{^1\text{H}\}$  NMR (100 MHz,  $\text{CDCl}_3$ )  $\delta$  172.6, 153.3, 144.3, 134.8, 129.0, 127.9, 127.2, 126.1, 125.2, 124.1, 112.9, 84.0, 80.8, 59.8, 44.1, 28.2, 15.2. HRMS-ESI ( $m/z$ ):  $[\text{M}+\text{Na}]^+$  calcd for  $\text{C}_{22}\text{H}_{25}\text{BrN}_2\text{NaO}_4^+$  483.0890, found 483.0894. The ee value was determined by chiral HPLC analysis (Chiralcel IA, hexane/*i*-PrOH = 70/30 flow rate = 1.0 mL/min,  $\lambda = 220$  nm). Retention times:  $t_R = 4.8$  min for (*S*)-isomer and  $t_R = 9.3$  min for (*R*)-isomer.

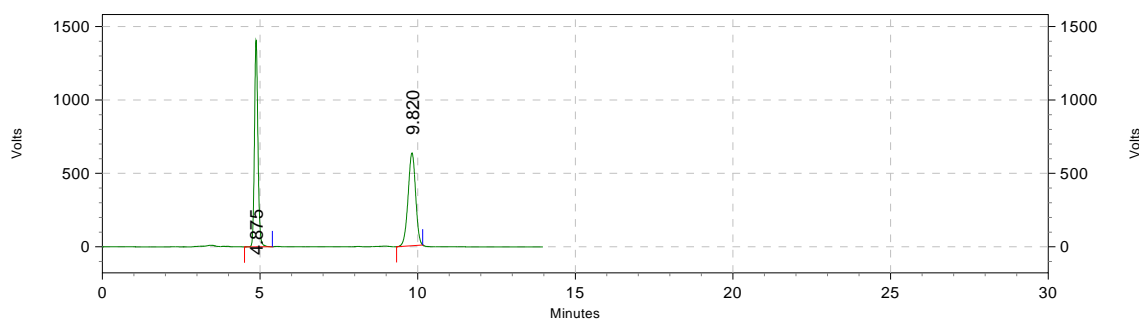

| Peaks | Ret. Time | Area     | Area%  |
|-------|-----------|----------|--------|
| 1     | 4.875     | 10776967 | 50.741 |
| 2     | 9.820     | 10462081 | 49.259 |

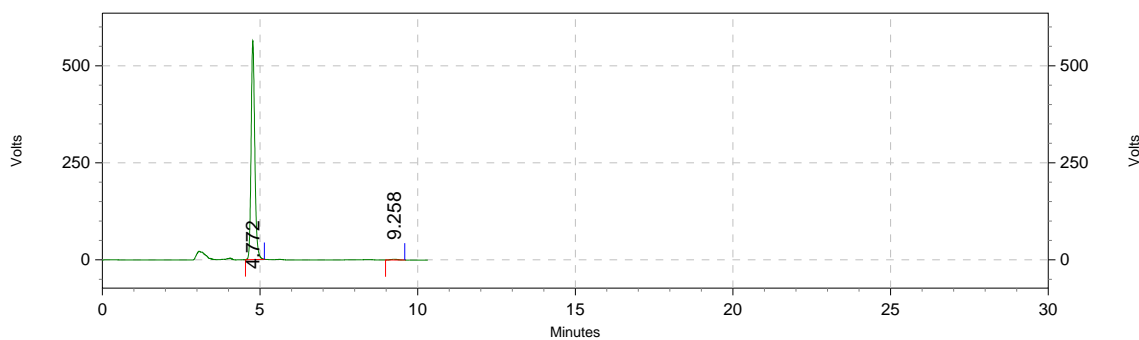

| Peaks | Ret. Time | Area    | Area%  |
|-------|-----------|---------|--------|
| 1     | 4.772     | 4567953 | 99.351 |
| 2     | 9.258     | 29859   | 0.649  |

**(S)-tert-butyl-(1-benzyl-7-bromo-3-ethoxy-2-oxindolin-3-yl)carbamate (3r)**

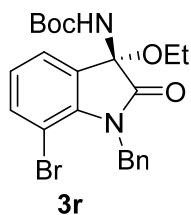

White solid, 95% yield, 97% ee, mp 143-147 °C.  $[\alpha]_D^{20} = -11.00$  (c = 1.20, CH<sub>2</sub>Cl<sub>2</sub>). <sup>1</sup>H NMR (400 MHz, CDCl<sub>3</sub>) δ 7.59 (d, J = 7.1 Hz, 1H), 7.42 – 7.38 (m, 1H), 7.33 – 7.28 (m, 4H), 7.24 (d, J = 6.0 Hz, 1H), 6.96 (t, J = 7.8 Hz, 1H), 5.55 (s, 1H), 5.44 (d, J = 16.5 Hz, 1H), 5.37 (d, J = 16.5 Hz, 1H), 3.50 (q, J = 7.0 Hz, 2H), 1.35 (s, 9H), 1.15 (t, J = 7.0 Hz, 3H). <sup>13</sup>C {<sup>1</sup>H} NMR (100 MHz, CDCl<sub>3</sub>) δ 173.5, 153.1, 140.6, 137.1, 136.4, 130.0, 128.6, 127.1, 126.4, 124.5, 102.8, 83.5, 80.9, 59.8, 44.8, 28.1, 15.2. HRMS-ESI(m/z): [M+Na]<sup>+</sup> calcd for C<sub>22</sub>H<sub>25</sub>BrN<sub>2</sub>NaO<sub>4</sub><sup>+</sup> 483.0890, found 483.0892. The ee value was determined by chiral HPLC analysis (Chiralcel IA, hexane/i-PrOH = 70/30 flow rate = 1.0 mL/min, λ = 220 nm). Retention times: t<sub>R</sub> = 4.9 min for (S)-isomer and t<sub>R</sub> = 14.3 min for (R)-isomer.

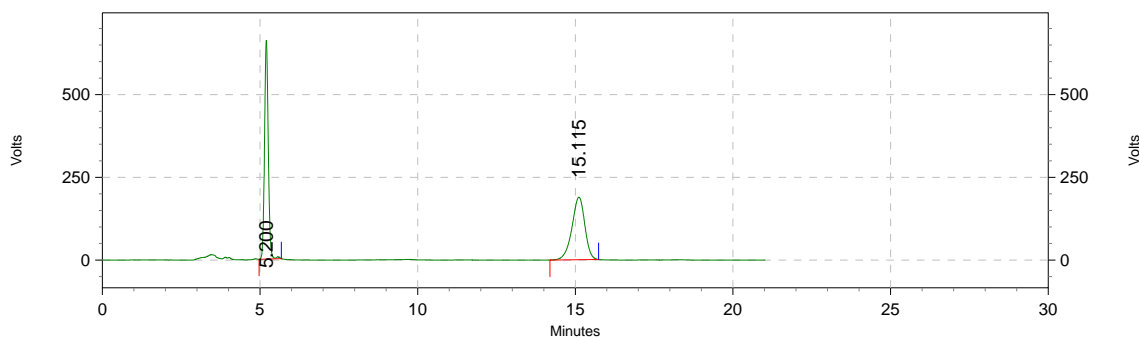

| Peaks | Ret. Time | Area    | Area%  |
|-------|-----------|---------|--------|
| 1     | 5.200     | 5413974 | 50.332 |
| 2     | 15.115    | 5342497 | 49.668 |

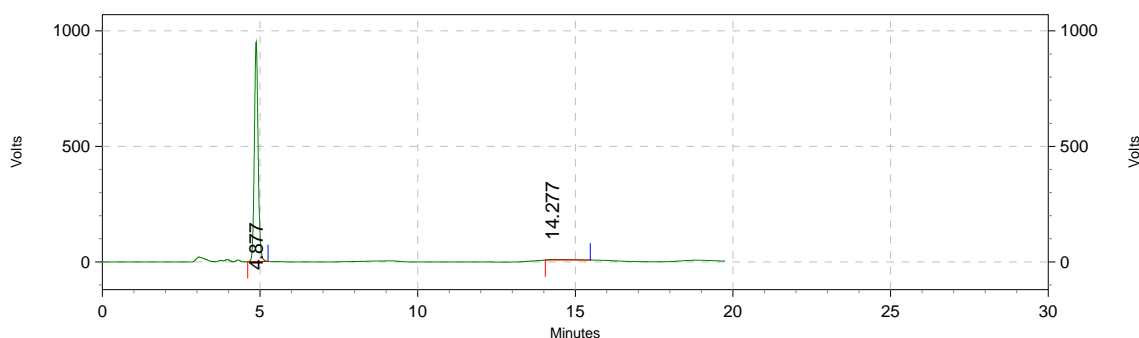

| Peaks | Ret. Time | Area    | Area%  |
|-------|-----------|---------|--------|
| 1     | 4.877     | 7881997 | 98.360 |
| 2     | 14.277    | 131428  | 1.640  |

**(S)-tert-butyl-(1-benzyl-3-ethoxy-5-fluoro-2-oxindolin-3-yl)carbamate (3s)**

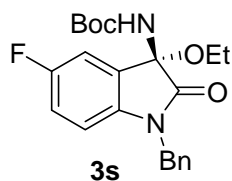

White solid, 93% yield, 98% ee, mp 130-132 °C.  $[\alpha]_D^{20} = -11.53$  (c = 1.00, CH<sub>2</sub>Cl<sub>2</sub>). <sup>1</sup>H NMR (400 MHz, CDCl<sub>3</sub>) δ 7.41 (d, J = 6.1 Hz, 1H), 7.23 (d, J = 4.3 Hz, 4H), 7.20 – 7.16 (m, 1H), 6.82 (td, J = 8.8, 2.7 Hz, 1H), 6.52 (dd, J = 8.6, 4.0 Hz, 1H), 5.58 (s, 1H), 4.87 (d, J = 15.8 Hz, 1H), 4.77 (d, J = 15.8 Hz, 1H), 3.45 (q, J = 7.0 Hz, 2H), 1.29 (s, 9H), 1.09 (t, J = 7.0 Hz, 3H). <sup>13</sup>C {<sup>1</sup>H} NMR (100 MHz, CDCl<sub>3</sub>) δ 172.4, 159.4 (d, <sup>1</sup>J<sub>C-F</sub> = 242.0 Hz), 153.3, 138.7, 135.0, 128.9, 128.1 (d, <sup>3</sup>J<sub>C-F</sub> = 8.2 Hz), 127.8, 127.2, 116.6 (d, <sup>2</sup>J<sub>C-F</sub> = 23.7 Hz), 114.2 (d,

$^2J_{C-F} = 25.3$  Hz), 110.1 (d,  $^3J_{C-F} = 7.8$  Hz), 84.2, 80.8, 59.8, 44.1, 28.2, 15.2.  $^{19}\text{F}$  NMR ( $\text{CDCl}_3$ )  $\delta$  -119.4. HRMS-ESI( $m/z$ ):  $[\text{M}+\text{Na}]^+$  calcd for  $\text{C}_{22}\text{H}_{25}\text{FN}_2\text{NaO}_4^+$  423.1691, found 423.1690. The ee value was determined by chiral HPLC analysis (Chiralcel IA, hexane/*i*-PrOH = 70/30 flow rate = 1.0 mL/min,  $\lambda = 220$  nm). Retention times:  $t_{\text{R}} = 4.8$  min for (*S*)-isomer and  $t_{\text{R}} = 11.1$  min for (*R*)-isomer.

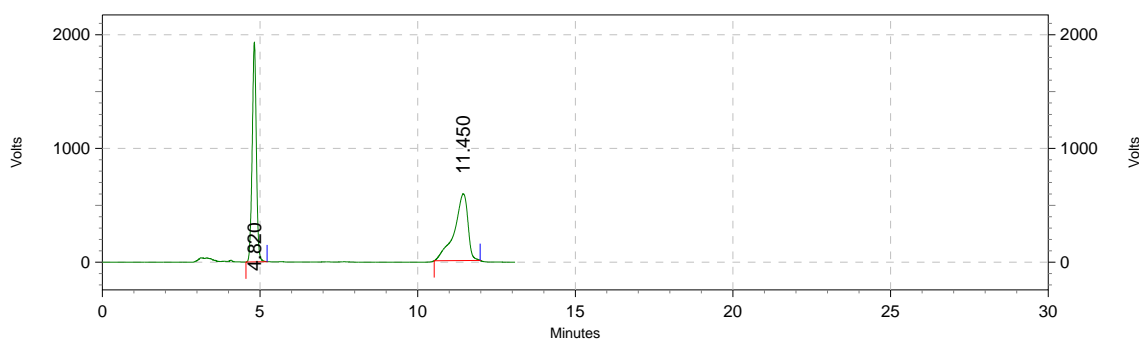

|   | Ret. Time | Area     | Area%  |
|---|-----------|----------|--------|
| 1 | 4.820     | 17644938 | 50.098 |
| 2 | 11.450    | 17575726 | 49.902 |

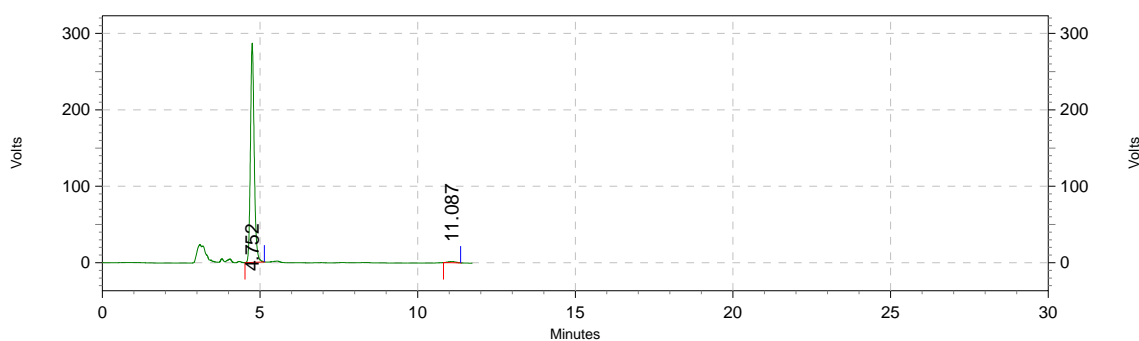

| Peaks | Ret. Time | Area    | Area%  |
|-------|-----------|---------|--------|
| 1     | 4.752     | 2370868 | 98.965 |
| 2     | 11.087    | 24788   | 1.035  |

**(*S*)-tert-butyl-(1-benzyl-3-ethoxy-6-fluoro-2-oxindolin-3-yl)carbamate (3t)**

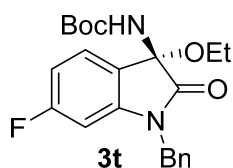

White solid, 94% yield, 92% ee, mp 145-147 °C.  $[\alpha]_{\text{D}}^{20} = +13.52$  ( $c = 1.00$ ,  $\text{CH}_2\text{Cl}_2$ ).  $^1\text{H}$

NMR (400 MHz, CDCl<sub>3</sub>) δ 7.68 – 7.60 (m, 1H), 7.33 (d, J = 5.7 Hz, 5H), 6.77 – 6.70 (m, 1H), 6.46 – 6.40 (m, 1H), 5.55 (s, 1H), 4.95 (d, J = 15.8 Hz, 1H), 4.83 (d, J = 15.8 Hz, 1H), 3.49 (q, J = 7.0 Hz, 2H), 1.37 (s, 9H), 1.17 (t, J = 7.0 Hz, 3H). <sup>13</sup>C {<sup>1</sup>H} NMR (100 MHz, CDCl<sub>3</sub>) δ 173.0, 164.1 (d, <sup>1</sup>J<sub>C-F</sub> = 248.1 Hz), 153.3, 144.7 (d, <sup>3</sup>J<sub>C-F</sub> = 11.5 Hz), 134.8, 129.5, 129.0, 127.9, 127.4 (d, <sup>3</sup>J<sub>C-F</sub> = 14.9 Hz), 121.8, 109.3 (d, <sup>2</sup>J<sub>C-F</sub> = 22.5 Hz), 98.4 (d, <sup>2</sup>J<sub>C-F</sub> = 27.9 Hz), 83.9, 80.7, 59.7, 44.1, 28.2, 15.2. <sup>19</sup>F NMR (CDCl<sub>3</sub>) δ -108.6. HRMS-ESI(m/z): [M+Na]<sup>+</sup> calcd for C<sub>22</sub>H<sub>25</sub>FN<sub>2</sub>NaO<sub>4</sub><sup>+</sup> 423.1691, found 423.1694. The ee value was determined by chiral HPLC analysis (Chiralcel IA, hexane/i-PrOH = 70/30 flow rate = 1.0 mL/min, λ = 220 nm). Retention times: t<sub>R</sub> = 4.7min for (*S*)-isomer and t<sub>R</sub> = 9.3 min for (*R*)-isomer.

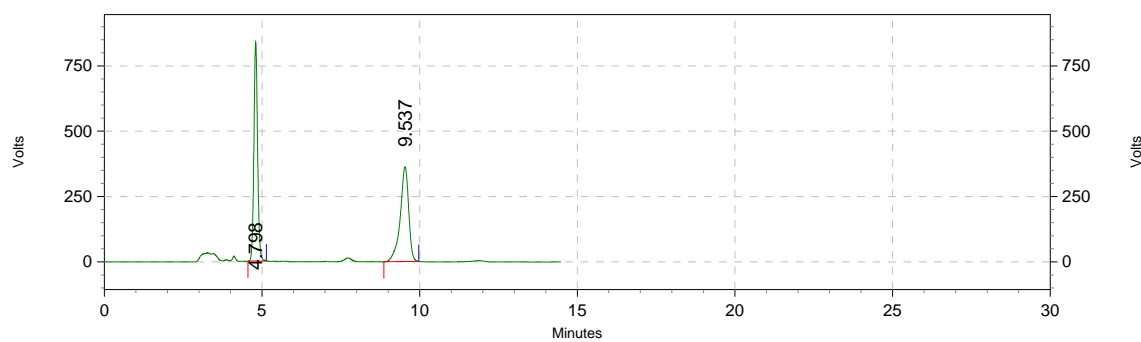

| Peaks | Ret. Time | Area    | Area%  |
|-------|-----------|---------|--------|
| 1     | 4.798     | 6812894 | 50.242 |
| 2     | 9.537     | 6747213 | 49.758 |

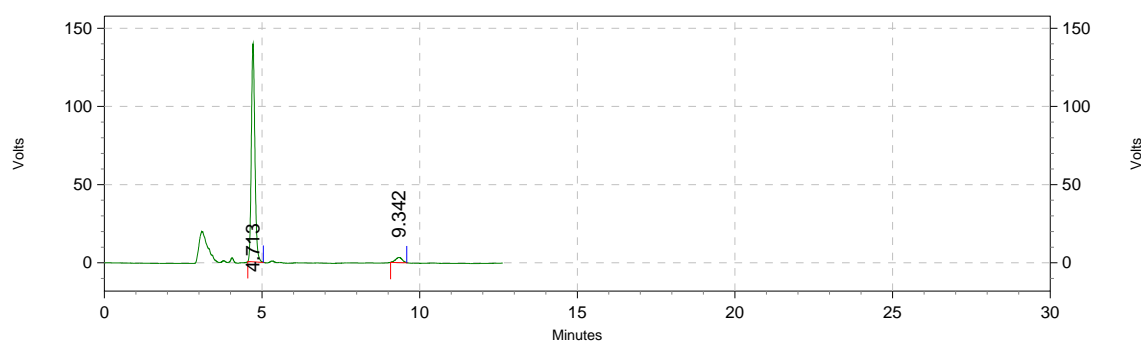

| Peaks | Ret. Time | Area    | Area%  |
|-------|-----------|---------|--------|
| 1     | 4.713     | 1094280 | 95.831 |
| 2     | 9.342     | 47609   | 4.169  |

**(S)-tert-butyl-(1-benzyl-3-ethoxy-7-fluoro-2-oxoindolin-3-yl)carbamate (3u)**

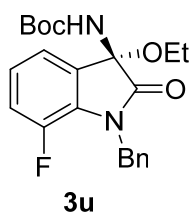

White solid, 89% yield, 96% ee, mp 150-152 °C.  $[\alpha]_D^{20} = -3.32$  (c = 1.00, CH<sub>2</sub>Cl<sub>2</sub>). <sup>1</sup>H NMR (400 MHz, CDCl<sub>3</sub>) δ 7.44 (s, 1H), 7.38 (d, J = 7.3 Hz, 2H), 7.34 – 7.27 (m, 3H), 7.05 – 6.98 (m, 2H), 5.52 (s, 1H), 5.11 (d, J = 15.3 Hz, 1H), 5.00 (d, J = 15.3 Hz, 1H), 3.45 (q, J = 7.0 Hz, 2H), 1.34 (s, 9H), 1.14 (t, J = 7.0 Hz, 3H). <sup>13</sup>C {<sup>1</sup>H} NMR (100 MHz, CDCl<sub>3</sub>) δ 172.5, 153.1, 147.6 (d, <sup>1</sup>J<sub>C-F</sub> = 244.9 Hz), 136.6, 129.6 (d, <sup>3</sup>J<sub>C-F</sub> = 8.8 Hz), 129.3, 128.6, 127.6 (d, <sup>2</sup>J<sub>C-F</sub> = 10.5 Hz), 123.9 (d, <sup>3</sup>J<sub>C-F</sub> = 6.3 Hz), 121.4, 118.6 (d, <sup>2</sup>J<sub>C-F</sub> = 19.6 Hz), 84.2, 80.8, 59.8, 45.7, 28.1, 15.2. <sup>19</sup>F NMR (CDCl<sub>3</sub>) δ -133.5. HRMS-ESI (m/z): [M+Na]<sup>+</sup> calcd for C<sub>22</sub>H<sub>25</sub>FN<sub>2</sub>NaO<sub>4</sub><sup>+</sup> 423.1691, found 423.1690. The ee value was determined by chiral HPLC analysis (Chiralcel IA, hexane/i-PrOH = 70/30 flow rate = 1.0 mL/min, λ = 220 nm). Retention times: t<sub>R</sub> = 5.0 min for (*S*)-isomer and t<sub>R</sub> = 15.2 min for (*R*)-isomer.

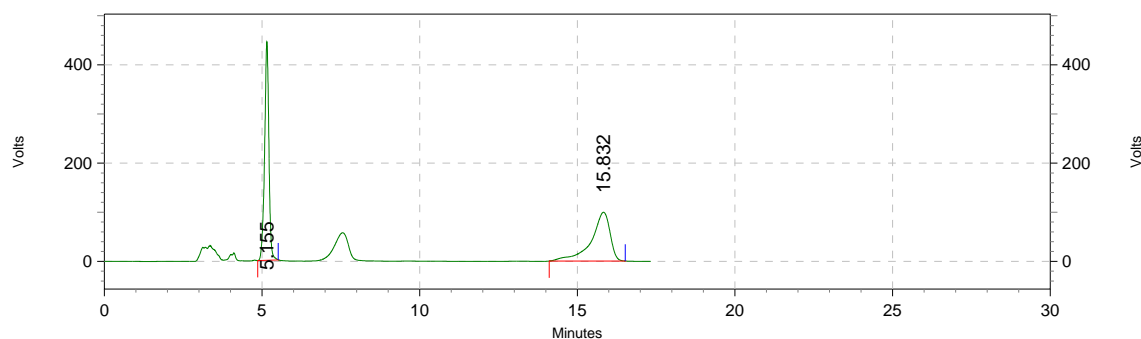

| Peaks | Ret. Time | Area    | Area%  |
|-------|-----------|---------|--------|
| 1     | 5.155     | 4211821 | 50.567 |
| 2     | 15.832    | 4117344 | 49.433 |

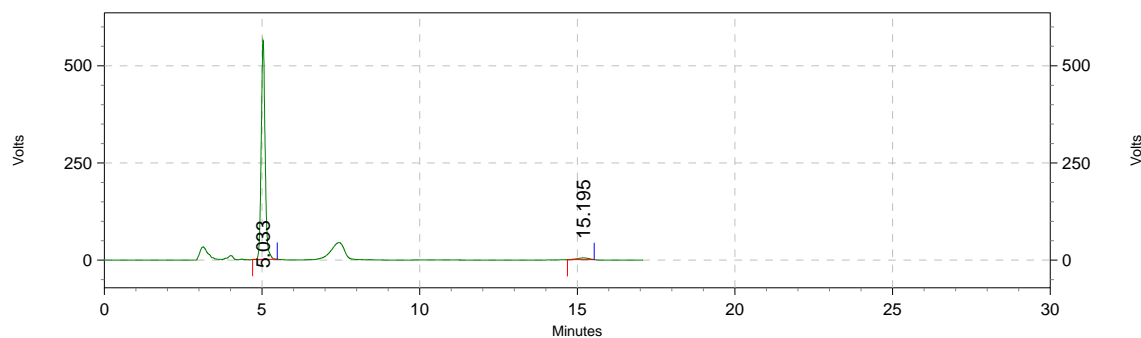

| Peaks | Ret. Time | Area    | Area%  |
|-------|-----------|---------|--------|
| 1     | 5.033     | 4820085 | 97.710 |
| 2     | 15.195    | 112962  | 2.290  |

**(S)-tert-butyl-(1-benzyl-3-ethoxy-5-methoxy-2-oxindolin-3-yl)carbamate (3v)**

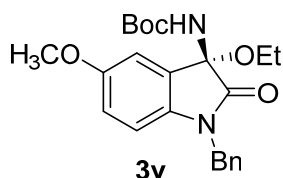

White solid, 93% yield, 98% ee, mp 102-104 °C.  $[\alpha]_D^{20} = +5.84$  (c = 1.00, CH<sub>2</sub>Cl<sub>2</sub>). <sup>1</sup>H NMR (400 MHz, CDCl<sub>3</sub>) δ 7.32 (t, J = 5.6 Hz, 5H), 7.24 (dd, J = 5.7, 1.8 Hz, 1H), 6.74 (dd, J = 8.5, 2.4 Hz, 1H), 6.59 (d, J = 8.5 Hz, 1H), 5.63 (s, 1H), 4.96 (d, J = 15.7 Hz, 1H), 4.83 (d, J = 15.6 Hz, 1H), 3.76 (d, J = 1.5 Hz, 3H), 3.51 (q, J = 7.0 Hz, 2H), 1.36 (s, 9H), 1.17 (t, J = 7.0 Hz, 3H). <sup>13</sup>C {<sup>1</sup>H} NMR (100 MHz, CDCl<sub>3</sub>) δ 172.4, 156.3, 153.3, 136.2, 135.4, 128.8, 127.7, 127.5, 127.3, 115.0, 112.7, 110.0, 84.6, 80.6, 59.7, 55.8, 44.0, 29.7, 28.2, 15.3. HRMS-ESI (m/z): [M+Na]<sup>+</sup> calcd for C<sub>23</sub>H<sub>28</sub>N<sub>2</sub>NaO<sub>5</sub><sup>+</sup> 435.1890, found 435.1894. The ee value was determined by chiral HPLC analysis (Chiralcel IA, hexane/i-PrOH = 70/30 flow rate = 1.0 mL/min, λ = 220 nm). Retention times: t<sub>R</sub> = 5.5 min for (S)-isomer and t<sub>R</sub> = 19.2 min for (R)-isomer.



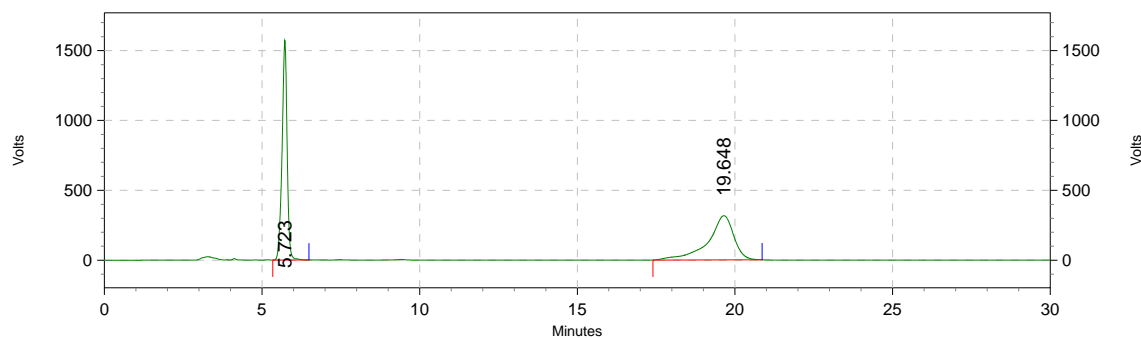

| Peaks | Ret. Time | Area     | Area%  |
|-------|-----------|----------|--------|
| 1     | 5.723     | 17661158 | 49.632 |
| 2     | 19.648    | 17923352 | 50.368 |

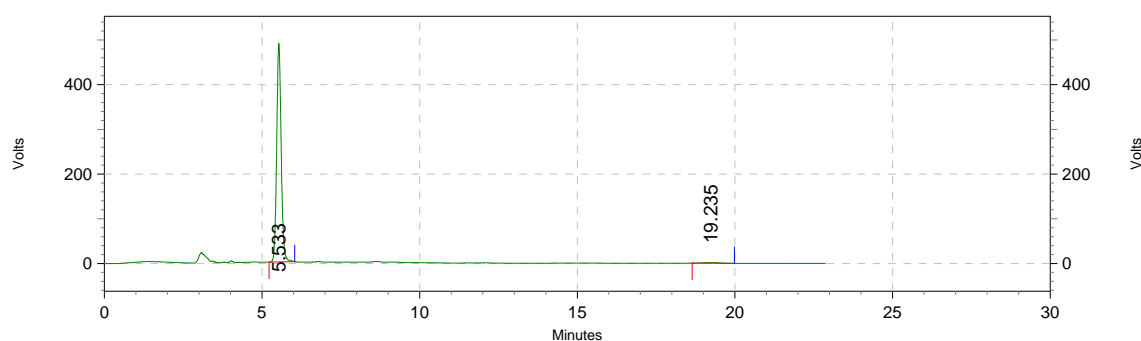

| Peaks | Ret. Time | Area    | Area%  |
|-------|-----------|---------|--------|
| 1     | 5.533     | 4809542 | 98.904 |
| 2     | 19.235    | 53278   | 1.096  |

**(S)-tert-butyl-(1-benzyl-3-ethoxy-6-methoxy-2-oxindolin-3-yl)carbamate (3w)**

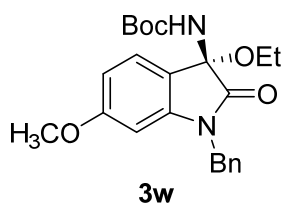

White solid, 89% yield, 87% ee, mp 130-133 °C.  $[\alpha]_D^{20} = +3.07$  (c = 1.00, CH<sub>2</sub>Cl<sub>2</sub>). <sup>1</sup>H NMR (400 MHz, CDCl<sub>3</sub>) δ 7.51 (d, J = 8.3 Hz, 1H), 7.25 – 7.13 (m, 5H), 6.45 (dd, J = 8.3, 2.2 Hz, 1H), 6.20 (d, J = 2.2 Hz, 1H), 5.55 (s, 1H), 4.86 (d, J = 15.7 Hz, 1H), 4.73 (d, J = 15.7 Hz, 1H), 3.62 (s, 3H), 3.38 (qd, J = 7.0, 5.2 Hz, 2H), 1.27 (s, 9H), 1.06 (t, J = 7.0 Hz, 3H). <sup>13</sup>C {<sup>1</sup>H} NMR (100 MHz, CDCl<sub>3</sub>) δ 173.3, 161.6, 153.4, 144.4, 135.4, 128.8, 127.7, 127.3, 127.0, 118.1, 106.5, 97.7, 84.3, 80.4, 59.6, 55.4, 44.0, 28.2, 15.3. HRMS-ESI (m/z): [M+Na]<sup>+</sup> calcd

for  $C_{23}H_{28}N_2NaO_5^+$  435.1890, found 435.1892. The ee value was determined by chiral HPLC analysis (Chiralcel IA, hexane/i-PrOH = 70/30 flow rate = 1.0 mL/min,  $\lambda = 220$  nm). Retention times:  $t_R = 5.6$  min for (*S*)-isomer and  $t_R = 14.9$  min for (*R*)-isomer.

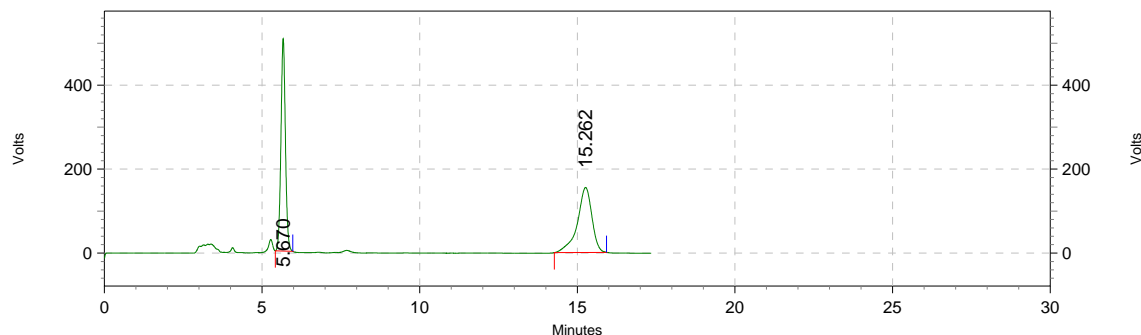

| Peaks | Ret. Time | Area    | Area%  |
|-------|-----------|---------|--------|
| 1     | 5.670     | 5005159 | 50.211 |
| 2     | 15.262    | 4963074 | 49.789 |

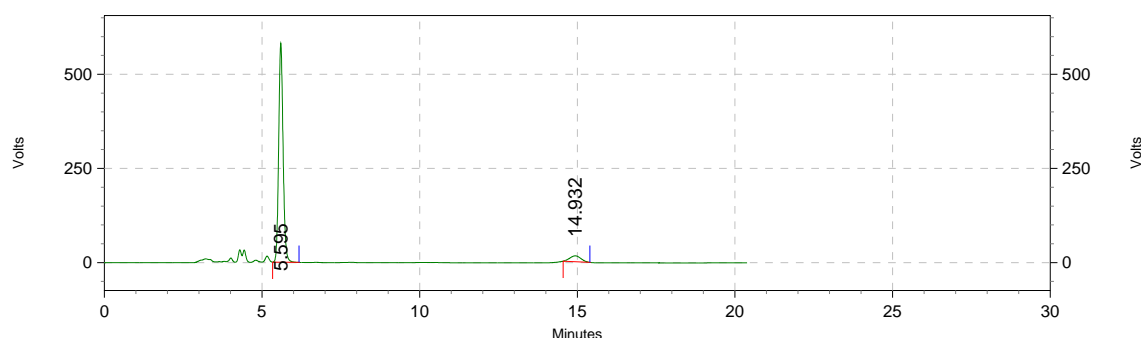

| Peaks | Ret. Time | Area    | Area%  |
|-------|-----------|---------|--------|
| 1     | 5.595     | 5644703 | 93.630 |
| 2     | 14.932    | 384006  | 6.370  |

**(*S*)-tert-butyl-(1-benzyl-3-ethoxy-7-methoxy-2-oxindolin-3-yl)carbamate (3x)**

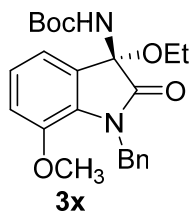

White solid, 92% yield, 96% ee, mp 143-145 °C.  $[\alpha]_D^{20} = -6.47$  ( $c = 1.20$ ,  $CH_2Cl_2$ ).  $^1H$  NMR (400 MHz,  $CDCl_3$ )  $\delta$  7.34 (d,  $J = 7.3$  Hz, 2H), 7.27 (t,  $J = 7.3$  Hz, 3H), 7.20 (t,  $J = 7.2$  Hz,

1H), 7.03 (t, J = 7.9 Hz, 1H), 6.86 (d, J = 8.3 Hz, 1H), 5.58 (s, 1H), 5.18 (s, 2H), 3.64 (s, 3H), 3.43 (q, J = 7.0 Hz, 2H), 1.33 (s, 9H), 1.12 (t, J = 7.0 Hz, 3H). <sup>13</sup>C {<sup>1</sup>H} NMR (100 MHz, CDCl<sub>3</sub>) δ 173.1, 153.2, 145.2, 138.1, 131.0, 128.3, 128.0, 127.3, 127.0, 123.9, 118.1, 114.6, 84.3, 80.5, 59.6, 55.8, 46.0, 28.1, 15.2. HRMS-ESI(m/z): [M+Na]<sup>+</sup> calcd for C<sub>23</sub>H<sub>28</sub>N<sub>2</sub>NaO<sub>5</sub><sup>+</sup> 435.1890, found 435.1893. The ee value was determined by chiral HPLC analysis (Chiralcel IA, hexane/i-PrOH = 70/30 flow rate = 1.0 mL/min, λ = 220 nm). Retention times: t<sub>R</sub> = 5.4 min for (*S*)-isomer and t<sub>R</sub> = 25.5 min for (*R*)-isomer.

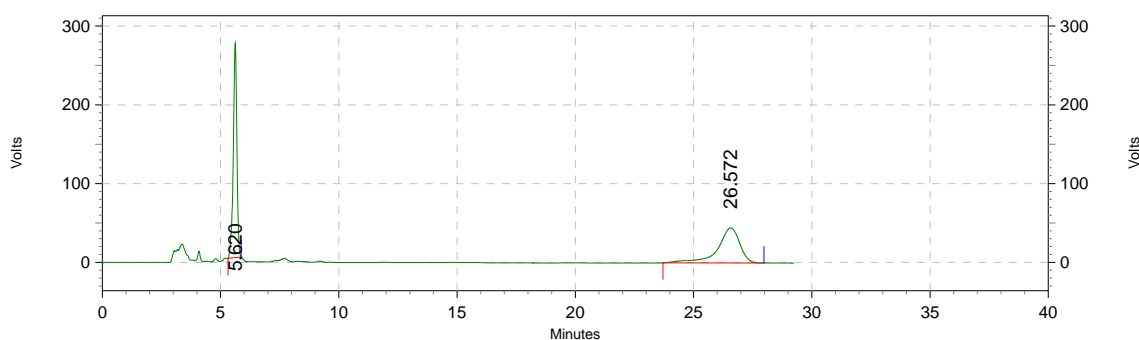

| Peaks | Ret. Time | Area    | Area%  |
|-------|-----------|---------|--------|
| 1     | 5.620     | 2840100 | 49.643 |
| 2     | 26.572    | 2880907 | 50.357 |

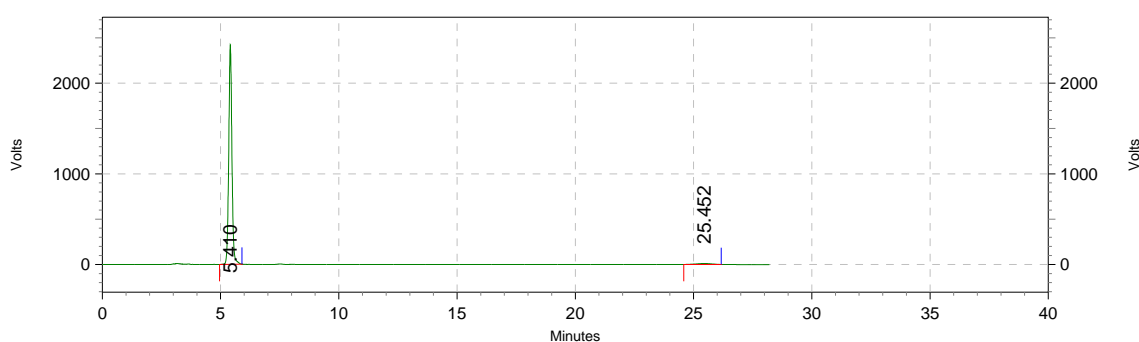

| Peaks | Ret. Time | Area     | Area%  |
|-------|-----------|----------|--------|
| 1     | 5.410     | 22702000 | 98.021 |
| 2     | 25.452    | 458343   | 1.979  |

**(S)-tert-butyl-(1-benzyl-3-ethoxy-5-methyl-2-oxindolin-3-yl)carbamate (3y)**

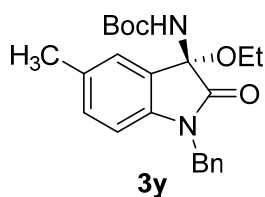

White solid, 89% yield, 98% ee, mp 132-136 °C.  $[\alpha]_D^{20} = +1.31$  (c = 1.00, CH<sub>2</sub>Cl<sub>2</sub>). <sup>1</sup>H NMR (400 MHz, CDCl<sub>3</sub>) δ 7.50 (s, 1H), 7.34 – 7.28 (m, 4H), 7.26 – 7.22 (m, 1H), 7.03 – 6.99 (m, 1H), 6.58 (d, J = 8.0 Hz, 1H), 5.57 (s, 1H), 4.96 (d, J = 15.7 Hz, 1H), 4.83 (d, J = 15.7 Hz, 1H), 3.50 (q, J = 7.0 Hz, 2H), 2.31 (s, 3H), 1.36 (s, 9H), 1.16 (t, J = 7.0 Hz, 3H). <sup>13</sup>C {<sup>1</sup>H} NMR (100 MHz, CDCl<sub>3</sub>) δ 172.6, 153.3, 140.5, 135.5, 132.8, 130.6, 128.8, 127.6, 127.3, 126.5, 109.2, 84.5, 80.5, 59.6, 43.9, 28.2, 21.1, 15.3. HRMS-ESI (m/z): [M+Na]<sup>+</sup> calcd for C<sub>23</sub>H<sub>28</sub>N<sub>2</sub>NaO<sub>4</sub><sup>+</sup> 419.1941, found 419.1946. The ee value was determined by chiral HPLC analysis (Chiralcel IA, hexane/i-PrOH = 70/30 flow rate = 1.0 mL/min, λ = 220 nm). Retention times: t<sub>R</sub> = 4.8 min for (S)-isomer and t<sub>R</sub> = 18.0 min for (R)-isomer.

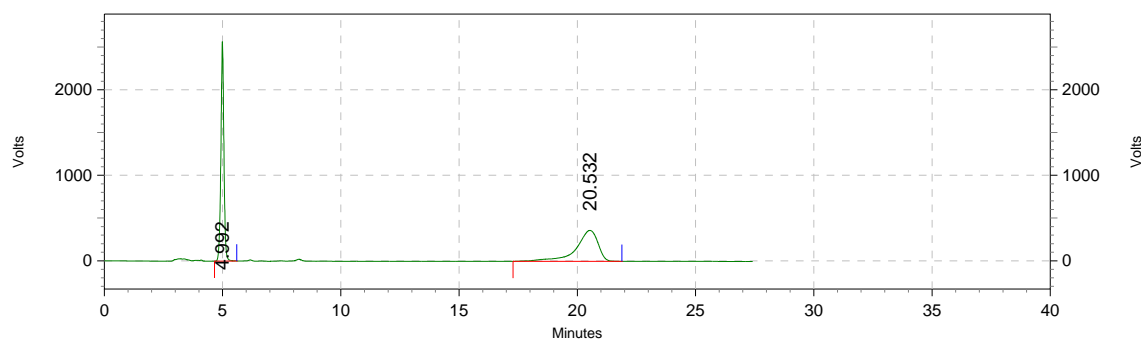

| Peaks | Ret. Time | Area     | Area%  |
|-------|-----------|----------|--------|
| 1     | 4.992     | 22872948 | 49.679 |
| 2     | 20.532    | 23168365 | 50.321 |

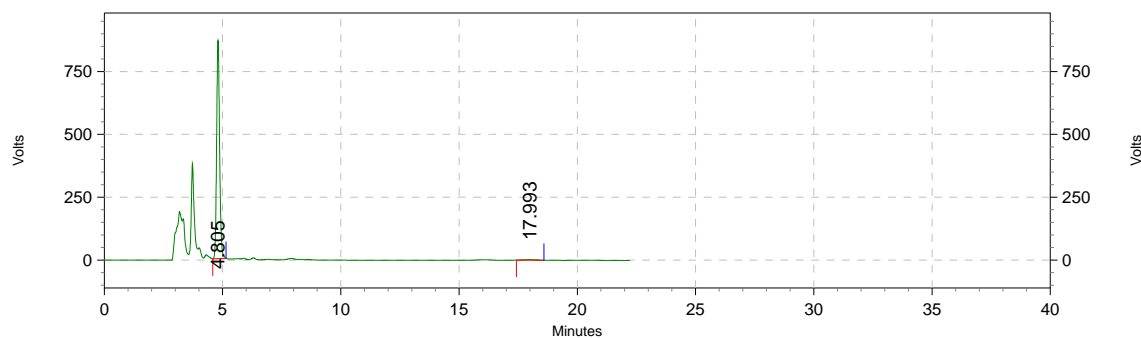

| Peaks | Ret. Time | Area    | Area%  |
|-------|-----------|---------|--------|
| 1     | 4.805     | 7550686 | 98.925 |
| 2     | 17.993    | 82084   | 1.075  |

**(S)-tert-butyl-(1-benzyl-3-ethoxy-7-methyl-2-oxindolin-3-yl)carbamate (3z)**

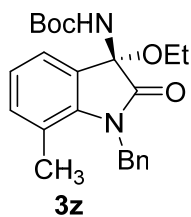

White solid, 89% yield, 97% ee, mp 144-146 °C.  $[\alpha]_D^{20} = -2.93$  (c = 1.00, CH<sub>2</sub>Cl<sub>2</sub>). <sup>1</sup>H NMR (400 MHz, CDCl<sub>3</sub>) δ 7.53 – 7.47 (m, 1H), 7.34 – 7.27 (m, 3H), 7.26 – 7.21 (m, 2H), 7.02 – 6.98 (m, 2H), 5.58 (s, 1H), 5.19 (s, 2H), 3.54 (q, J = 7.0 Hz, 2H), 2.23 (s, 3H), 1.36 (s, 9H), 1.17 (t, J = 7.0 Hz, 3H). <sup>13</sup>C {<sup>1</sup>H} NMR (100 MHz, CDCl<sub>3</sub>) δ 173.7, 153.3, 141.1, 137.3, 134.5, 128.9, 127.2, 125.8, 123.3, 123.2, 120.1, 83.8, 80.5, 59.6, 45.3, 28.2, 18.8, 15.3. HRMS-ESI (m/z): [M+Na]<sup>+</sup> calcd for C<sub>23</sub>H<sub>28</sub>N<sub>2</sub>NaO<sub>4</sub><sup>+</sup> 419.1941, found 419.1941. The ee value was determined by chiral HPLC analysis (Chiralcel IA, hexane/i-PrOH = 70/30 flow rate = 1.0 mL/min, λ = 220 nm). Retention times: t<sub>R</sub> = 5.0 min for (*S*)-isomer and t<sub>R</sub> = 15.7 min for (*R*)-isomer.

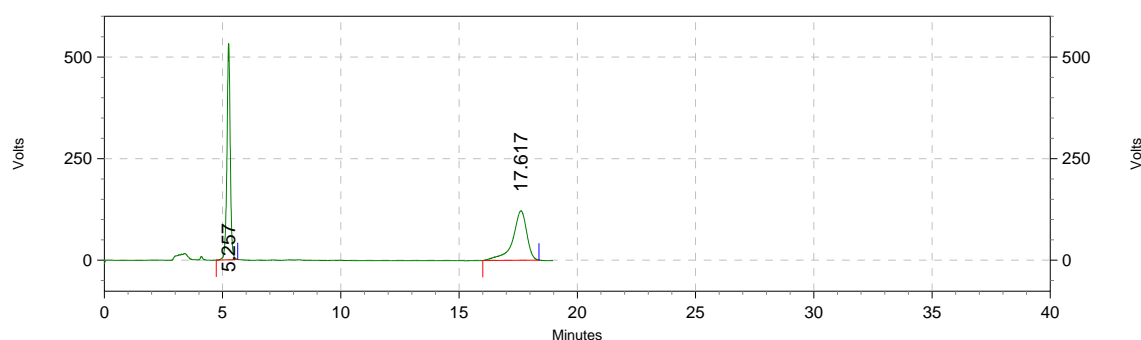

| Peaks | Ret. Time | Area    | Area%  |
|-------|-----------|---------|--------|
| 1     | 5.257     | 5136947 | 50.816 |
| 2     | 17.617    | 4971907 | 49.184 |

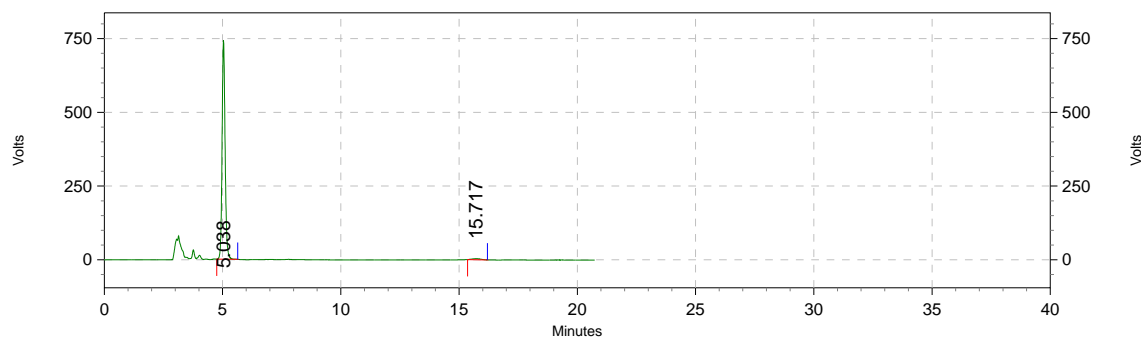

| Peaks | Ret. Time | Area    | Area%  |
|-------|-----------|---------|--------|
| 1     | 5.038     | 6578253 | 98.677 |
| 2     | 15.717    | 88185   | 1.323  |

**(S)-tert-butyl-(1-benzyl-3-ethoxy-5-nitro-2-oxindolin-3-yl)carbamate (3')**

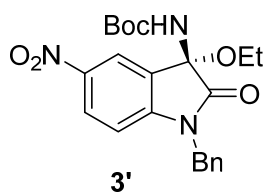

White solid, 92% yield, 96% ee, mp 120-122 °C.  $[\alpha]_D^{20} = +6.72$  (c = 1.20, CH<sub>2</sub>Cl<sub>2</sub>). <sup>1</sup>H NMR (400 MHz, CDCl<sub>3</sub>) δ 8.49 (d, J = 2.3 Hz, 1H), 8.18 (dd, J = 8.7, 2.3 Hz, 1H), 7.34 (d, J = 4.5 Hz, 4H), 7.29 (dd, J = 9.5, 4.5 Hz, 1H), 6.80 (d, J = 8.7 Hz, 1H), 5.75 (s, 1H), 5.04 – 4.93 (m, 2H), 3.59 (q, J = 7.0 Hz, 2H), 1.38 (s, 9H), 1.19 (t, J = 7.0 Hz, 3H). <sup>13</sup>C {<sup>1</sup>H} NMR (100 MHz, CDCl<sub>3</sub>) δ 172.8, 153.3, 148.5, 143.8, 134.3, 129.1, 128.1, 127.6, 127.2, 121.1, 109.4, 83.7, 81.3, 60.1, 44.3, 28.2, 15.2. HRMS-ESI (m/z): [M+Na]<sup>+</sup> calcd for C<sub>22</sub>H<sub>25</sub>N<sub>3</sub>NaO<sub>6</sub><sup>+</sup> 450.1636, found 450.1640. The ee value was determined by chiral HPLC analysis (Chiralcel IA, hexane/i-PrOH = 70/30 flow rate = 1.0 mL/min, λ = 220 nm). Retention times: t<sub>R</sub> = 5.3 min for (S)-isomer and t<sub>R</sub> = 11.0 min for (R)-isomer.

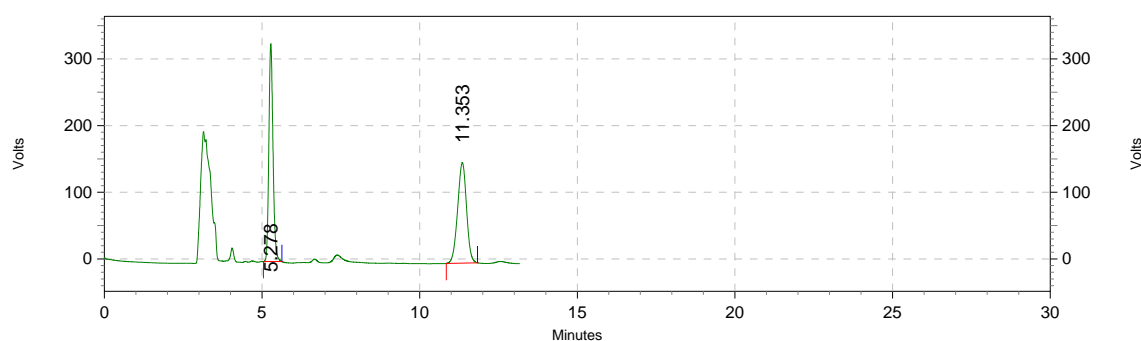

| Peaks | Ret. Time | Area    | Area%  |
|-------|-----------|---------|--------|
| 1     | 5.278     | 2976587 | 50.158 |
| 2     | 11.353    | 2957798 | 49.842 |

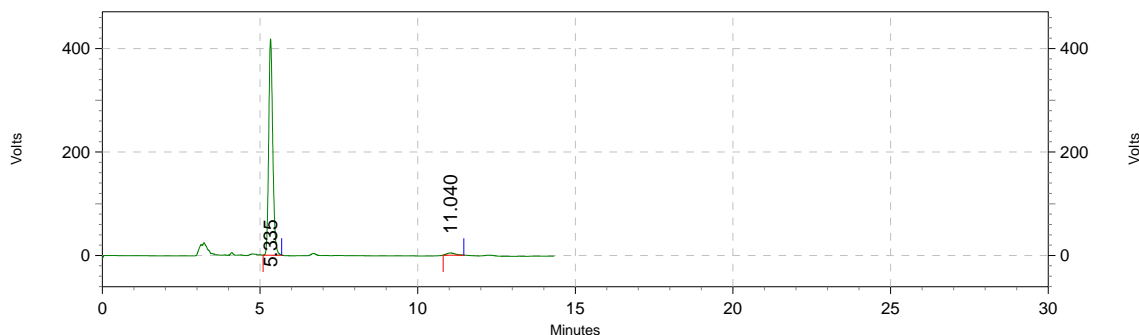

| Peaks | Ret. Time | Area    | Area%  |
|-------|-----------|---------|--------|
| 1     | 5.335     | 3738987 | 97.985 |
| 2     | 11.040    | 76891   | 2.015  |

**(S)-tert-butyl-(3-(tert-butylperoxy)-1-methyl-2-oxindolin-3-yl)carbamate (4a)<sup>9</sup>**

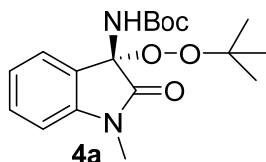

White solid, 83% yield, 94% ee, mp 97-99 °C.  $[\alpha]_{\text{D}}^{20} = +8.76$  (c = 2.60, CH<sub>2</sub>Cl<sub>2</sub>).  $[\alpha]_{\text{D}}^{20} = +1.83$  (c = 2.00, CHCl<sub>3</sub>). Reported results for (R)-**4a**:  $[\alpha]_{\text{D}}^{22} = -3,8$  (c 1.0, CHCl<sub>3</sub>, 84% ee). <sup>1</sup>H NMR (400 MHz, CDCl<sub>3</sub>) δ 7.66 (s, 1H), 7.25 (t, J = 7.4 Hz, 1H), 6.97 (t, J = 7.5 Hz, 1H), 6.73 (d, J = 7.7 Hz, 1H), 5.83 (s, 1H), 3.09 (s, 3H), 1.23 (s, 9H), 1.07 (s, 9H). <sup>13</sup>C {<sup>1</sup>H} NMR (100 MHz, CDCl<sub>3</sub>) δ 170.1, 153.0, 143.8, 130.6, 127.1, 125.3, 122.5, 108.2, 87.2, 81.3, 80.4, 28.0, 26.2. The ee value was determined by chiral HPLC analysis (Chiralcel AD-H, hexane/i-PrOH = 80/20 flow rate = 1.0 mL/min, λ = 254 nm). Retention times: t<sub>R</sub> = 5.0 min for (S)-isomer and t<sub>R</sub> = 7.0 min for (R)-isomer.

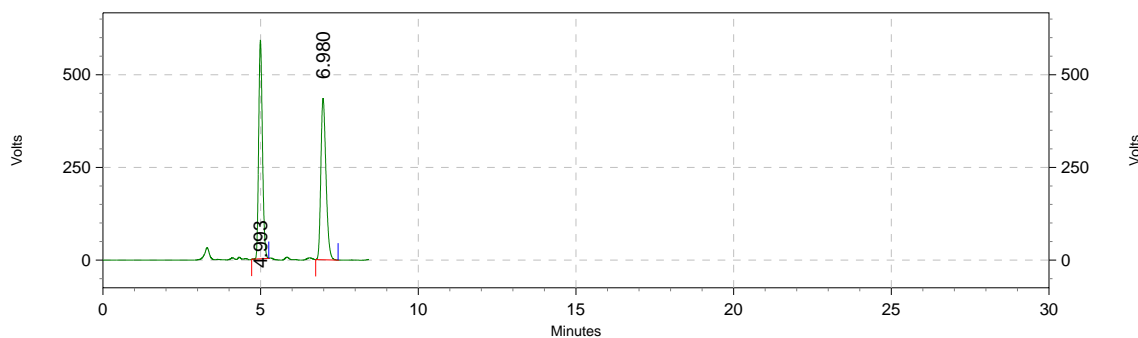

| Peaks | Ret. Time | Area    | Area%  |
|-------|-----------|---------|--------|
| 1     | 4.993     | 4898571 | 49.882 |
| 2     | 6.980     | 4921736 | 50.118 |

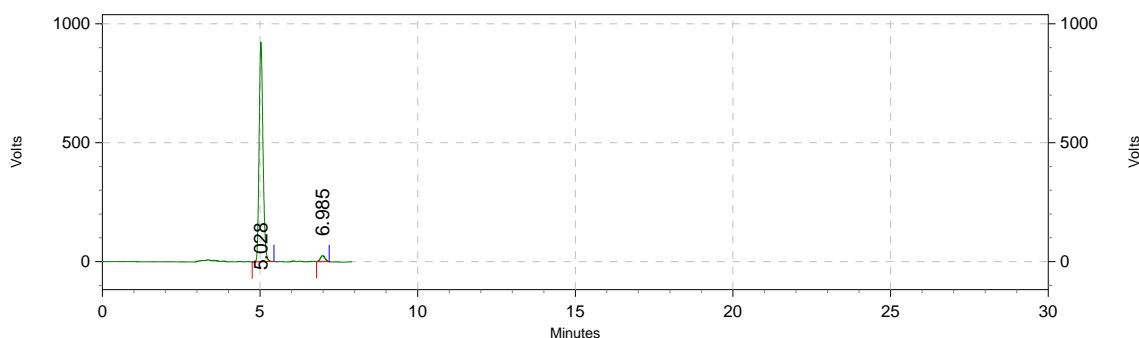

| Peaks | Ret. Time | Area    | Area%  |
|-------|-----------|---------|--------|
| 1     | 5.028     | 7867884 | 96.813 |
| 2     | 6.985     | 258979  | 3.187  |

**(S)-tert-butyl-(3-(tert-butyloxy)-1-ethyl-2-oxindolin-3-yl)carbamate (4b)**

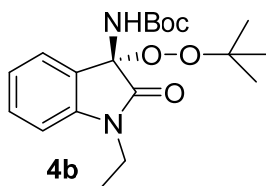

White solid, 84% yield, 92% ee, mp 108-110 °C.  $[\alpha]_D^{20} = +7.50$  (c = 4.00, CH<sub>2</sub>Cl<sub>2</sub>). <sup>1</sup>H NMR (400 MHz, CDCl<sub>3</sub>) δ 7.79 (d, J = 6.5 Hz, 1H), 7.34 (td, J = 7.8, 1.2 Hz, 1H), 7.08 – 7.03 (m, 1H), 6.84 (d, J = 7.8 Hz, 1H), 5.86 (s, 1H), 3.83 (dq, J = 14.4, 7.2 Hz, 1H), 3.68 (dt, J = 14.2, 7.1 Hz, 1H), 1.34 (s, 9H), 1.27 (t, J = 7.2 Hz, 3H), 1.15 (s, 9H). <sup>13</sup>C {<sup>1</sup>H} NMR (100 MHz, CDCl<sub>3</sub>) δ 170.0, 153.2, 143.0, 130.6, 127.6, 125.4, 122.4, 108.3, 87.1, 81.3, 80.4, 34.9, 28.1, 26.2, 12.5. HRMS-ESI (m/z): [M+Na]<sup>+</sup> calcd for C<sub>19</sub>H<sub>28</sub>N<sub>2</sub>NaO<sub>5</sub><sup>+</sup> 387.1890, found 387.1893.



The ee value was determined by chiral HPLC analysis (Chiralcel IA, hexane/*i*-PrOH = 80/20 flow rate = 1.0 mL/min,  $\lambda = 254$  nm). Retention times:  $t_R = 4.4$  min for (*S*)-isomer and  $t_R = 6.1$  min for (*R*)-isomer.

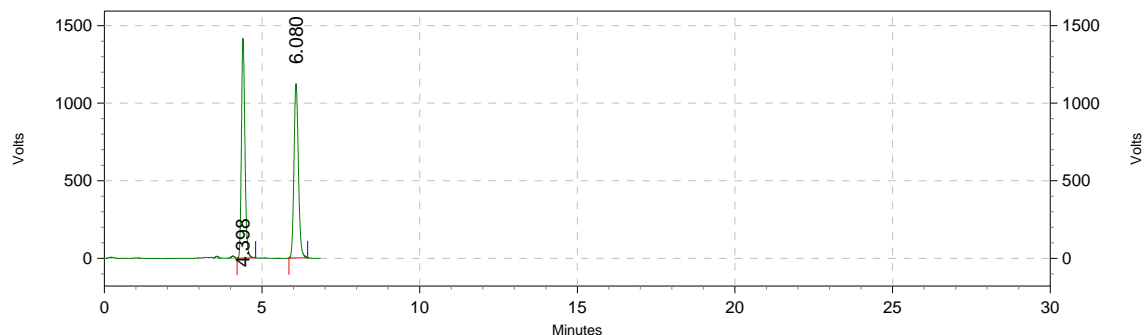

| Peaks | Ret. Time | Area     | Area%  |
|-------|-----------|----------|--------|
| 1     | 4.398     | 10898389 | 49.946 |
| 2     | 6.080     | 10921879 | 50.054 |

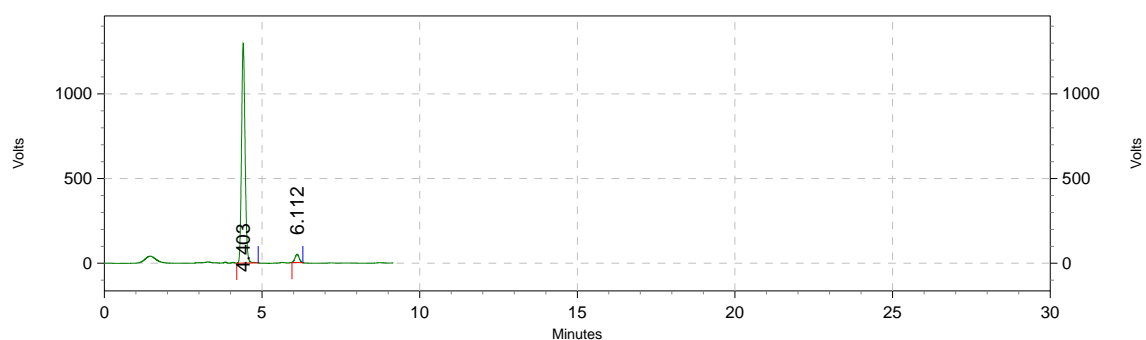

| Peaks | Ret. Time | Area     | Area%  |
|-------|-----------|----------|--------|
| 1     | 4.403     | 10084797 | 95.829 |
| 2     | 6.112     | 438967   | 4.171  |

**(*S*)-tert-butyl-(1-allyl-3-(tert-butyloxy)-2-oxindolin-3-yl)carbamate (4c)**

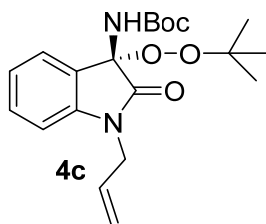

Yellow oil, 85% yield, 91% ee.  $[\alpha]_D^{20} = +4.34$  ( $c = 1.20$ ,  $\text{CH}_2\text{Cl}_2$ ).  $^1\text{H}$  NMR (400 MHz,  $\text{CDCl}_3$ )  $\delta$  7.75 – 7.66 (m, 1H), 7.23 (t,  $J = 7.5$  Hz, 1H), 6.98 (t,  $J = 7.4$  Hz, 1H), 6.72 (d,  $J =$

7.6 Hz, 1H), 5.79 (s, 2H), 5.16 (dd,  $J = 28.3, 13.7$  Hz, 2H), 4.40 (d,  $J = 16.3$  Hz, 1H), 4.11 (d,  $J = 16.1$  Hz, 1H), 1.27 (s, 9H), 1.07 (s, 9H).  $^{13}\text{C}$   $\{^1\text{H}\}$  NMR (100 MHz,  $\text{CDCl}_3$ )  $\delta$  170.2, 153.1, 143.1, 130.8, 130.5, 127.3, 125.3, 122.5, 117.5, 109.1, 87.2, 81.4, 80.5, 42.3, 28.1, 26.2. HRMS-ESI ( $m/z$ ):  $[\text{M}+\text{Na}]^+$  calcd for  $\text{C}_{20}\text{H}_{28}\text{N}_2\text{NaO}_5^+$  399.1890, found 399.1893. The ee value was determined by chiral HPLC analysis (Chiralcel IA, hexane/*i*-PrOH = 80/20 flow rate = 1.0 mL/min,  $\lambda = 254$  nm). Retention times:  $t_{\text{R}} = 4.5$  min for (*S*)-isomer and  $t_{\text{R}} = 6.6$  min for (*R*)-isomer.

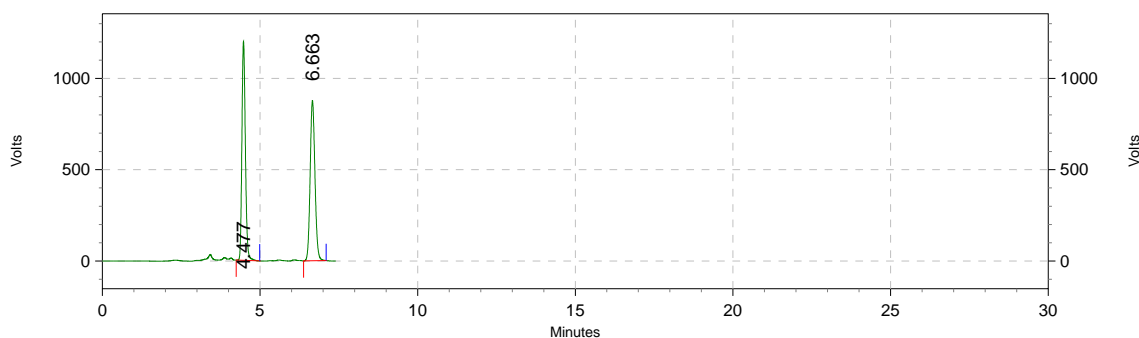

| Peaks | Ret. Time | Area    | Area%  |
|-------|-----------|---------|--------|
| 1     | 4.477     | 9192382 | 49.759 |
| 2     | 6.663     | 9281383 | 50.241 |

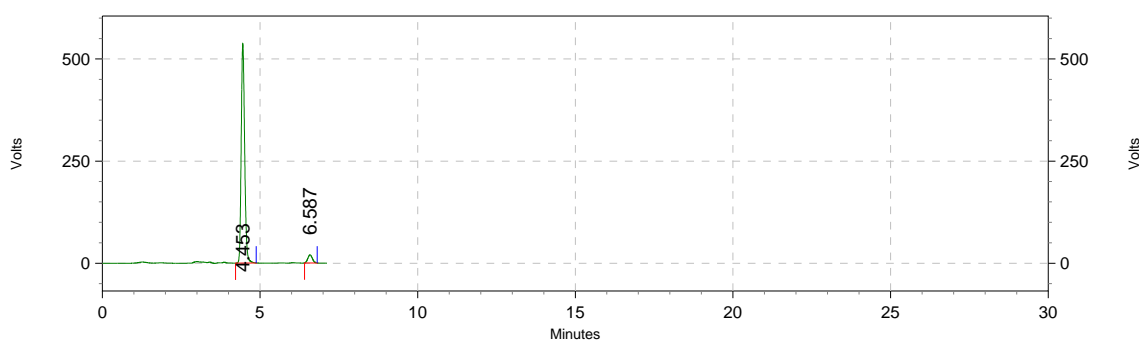

| Peaks | Ret. Time | Area    | Area%  |
|-------|-----------|---------|--------|
| 1     | 4.453     | 4084850 | 95.357 |
| 2     | 6.587     | 198900  | 4.643  |

**(S)-tert-butyl-(1-benzyl-3-(tert-butylperoxy)-2-oxoindolin-3-yl)carbamate (4d)<sup>10</sup>**

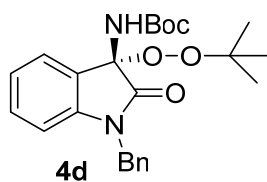

White solid, 86% yield, 97% ee, mp 107-109 °C.  $[\alpha]_D^{20} = -6.87$  (c = 1.0, CH<sub>2</sub>Cl<sub>2</sub>). <sup>1</sup>H NMR (400 MHz, CDCl<sub>3</sub>) δ 7.79 (d, J = 6.5 Hz, 1H), 7.30 (d, J = 8.0 Hz, 4H), 7.26 – 7.18 (m, 2H), 7.04 (d, J = 7.3 Hz, 1H), 6.65 (d, J = 7.8 Hz, 1H), 5.89 (s, 1H), 5.09 (d, J = 15.9 Hz, 1H), 4.75 (d, J = 15.9 Hz, 1H), 1.36 (s, 9H), 1.16 (s, 9H). <sup>13</sup>C {<sup>1</sup>H} NMR (100 MHz, CDCl<sub>3</sub>) δ 170.7, 153.2, 143.1, 135.2, 130.5, 128.9, 128.7, 127.6, 127.4, 127.1, 125.3, 122.6, 109.3, 87.3, 81.5, 80.7, 43.9, 28.1, 26.3. The ee value was determined by chiral HPLC analysis (Chiralcel AD-H, hexane/i-PrOH = 80/20 flow rate = 1.0 mL/min, λ = 254 nm). Retention times: t<sub>R</sub> = 6.6 min for (*S*)-isomer and t<sub>R</sub> = 21.4 min for (*R*)-isomer.

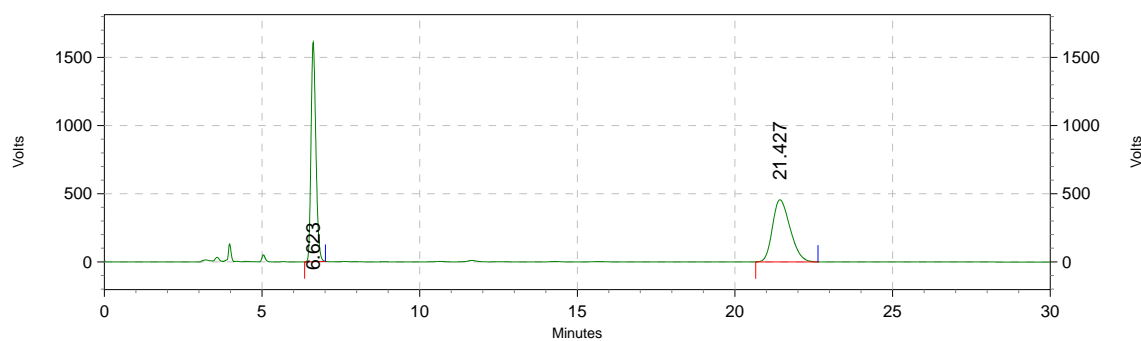

| Peaks | Ret. Time | Area     | Area%  |
|-------|-----------|----------|--------|
| 1     | 6.623     | 17266269 | 49.400 |
| 2     | 21.427    | 17685943 | 50.600 |

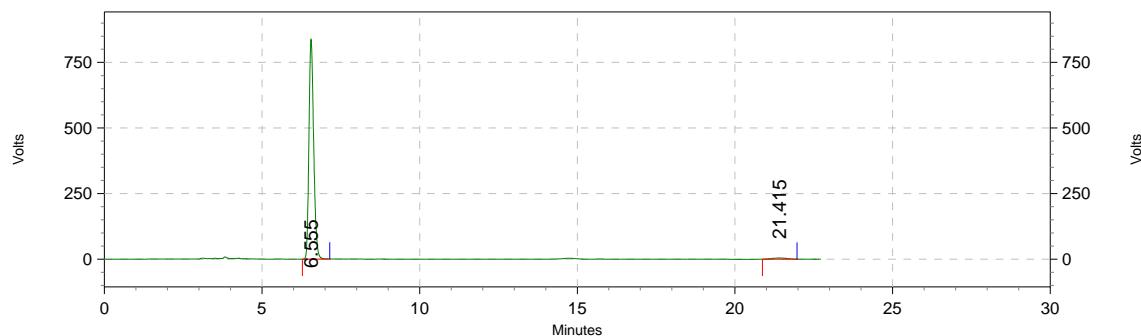

| Peaks | Ret. Time | Area    | Area%  |
|-------|-----------|---------|--------|
| 1     | 6.555     | 8693882 | 98.299 |
| 2     | 21.415    | 150446  | 1.701  |

**(S)-tert-butyl-(1-benzyl-3-(tert-butylperoxy)-5-chloro-2-oxoindolin-3-yl)carbamate (4e)**

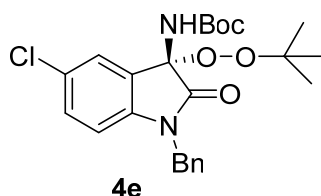

White solid, 87% yield, 97% ee, mp 140-142 °C.  $[\alpha]_D^{20} = -7.30$  (c = 1.0, CH<sub>2</sub>Cl<sub>2</sub>). <sup>1</sup>H NMR (400 MHz, CDCl<sub>3</sub>) δ 7.80 (s, 1H), 7.29 (s, 5H), 7.17 (d, J = 8.3 Hz, 1H), 6.56 (d, J = 8.3 Hz, 1H), 5.88 (s, 1H), 5.06 (d, J = 15.9 Hz, 1H), 4.75 (d, J = 15.9 Hz, 1H), 1.39 (s, 9H), 1.17 (s, 9H). <sup>13</sup>C {<sup>1</sup>H} NMR (100 MHz, CDCl<sub>3</sub>) δ 170.3, 153.2, 141.6, 134.8, 130.3, 128.8, 128.1, 127.8, 127.0, 110.3, 87.1, 81.8, 81.0, 53.5, 44.0, 29.7, 28.2, 26.3. HRMS-ESI (m/z): [M+Na]<sup>+</sup> calcd for C<sub>24</sub>H<sub>29</sub>ClN<sub>2</sub>NaO<sub>5</sub><sup>+</sup> 483.1657, found 483.1661. The ee value was determined by chiral HPLC analysis (Chiralcel IA, hexane/i-PrOH = 80/20 flow rate = 1.0 mL/min, λ = 254 nm). Retention times: t<sub>R</sub> = 5.6 min for (*S*)-isomer and t<sub>R</sub> = 8.8 min for (*R*)-isomer.

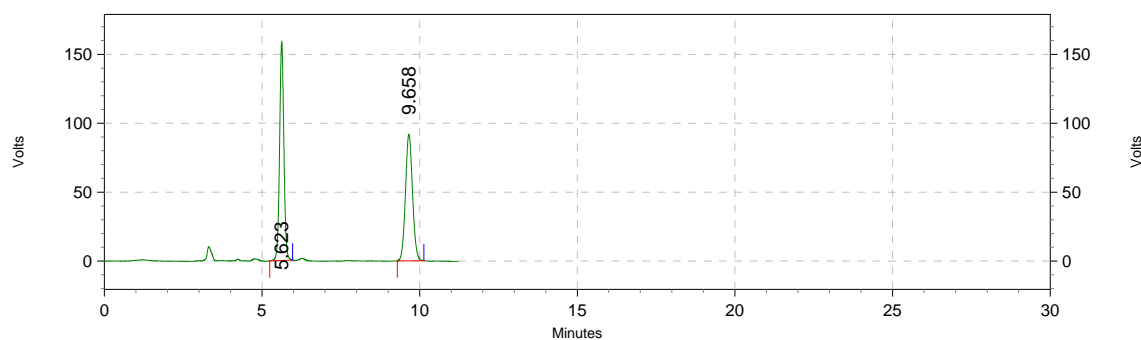

|   | Ret. Time | Area    | Area%  |
|---|-----------|---------|--------|
| 1 | 5.623     | 1495209 | 51.209 |
| 2 | 9.658     | 1424603 | 48.791 |

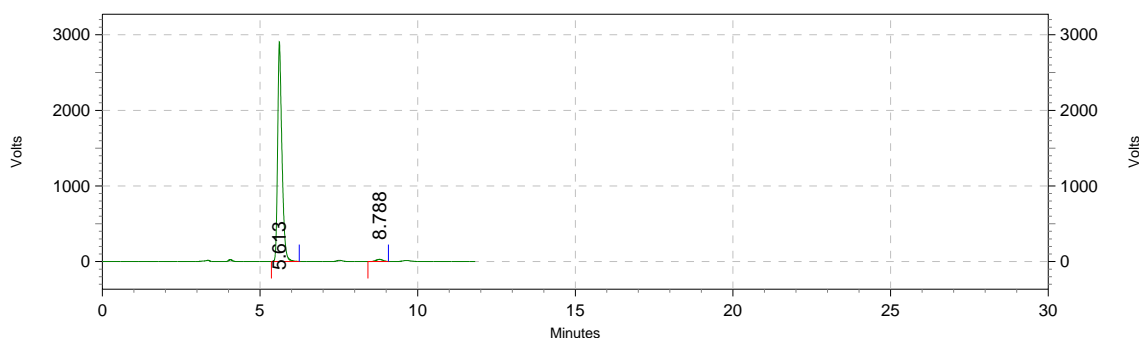

| Peaks | Ret. Time | Area     | Area%  |
|-------|-----------|----------|--------|
| 1     | 5.613     | 27414146 | 98.470 |
| 2     | 8.788     | 426017   | 1.530  |

**(S)-tert-butyl-(1-benzyl-3-(tert-butylperoxy)-6-chloro-2-oxindolin-3-yl)carbamate (4f)**

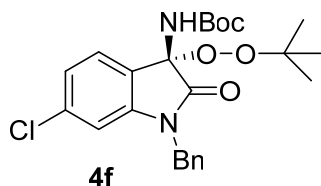

White solid, 74% yield, 92% ee, mp 114-116 °C.  $[\alpha]_D^{20} = -2.59$  ( $c = 1.0$ ,  $\text{CH}_2\text{Cl}_2$ ).  $^1\text{H}$  NMR (400 MHz,  $\text{CDCl}_3$ )  $\delta$  7.74 (d,  $J = 7.6$  Hz, 1H), 7.30 (d,  $J = 4.0$  Hz, 4H), 7.25 (s, 1H), 7.01 (d,  $J = 8.0$  Hz, 1H), 6.65 (s, 1H), 5.90 (s, 1H), 5.06 (d,  $J = 16.0$  Hz, 1H), 4.73 (d,  $J = 16.0$  Hz, 1H), 1.38 (s, 9H), 1.16 (s, 9H).  $^{13}\text{C}$   $\{^1\text{H}\}$  NMR (100 MHz,  $\text{CDCl}_3$ )  $\delta$  170.7, 153.2, 144.3, 136.3, 134.7, 128.9, 127.8, 127.0, 123.7, 122.6, 109.9, 86.8, 81.7, 80.9, 53.5, 44.0, 28.1, 26.3. HRMS-ESI ( $m/z$ ):  $[\text{M}+\text{Na}]^+$  calcd for  $\text{C}_{24}\text{H}_{29}\text{ClN}_2\text{NaO}_5^+$  483.1657, found 483.1658. The ee value was determined by chiral HPLC analysis (Chiralcel IA, hexane/*i*-PrOH = 80/20 flow rate = 1.0 mL/min,  $\lambda = 254$  nm). Retention times:  $t_R = 6.3$  min for (*S*)-isomer and  $t_R = 9.0$  min for (*R*)-isomer.

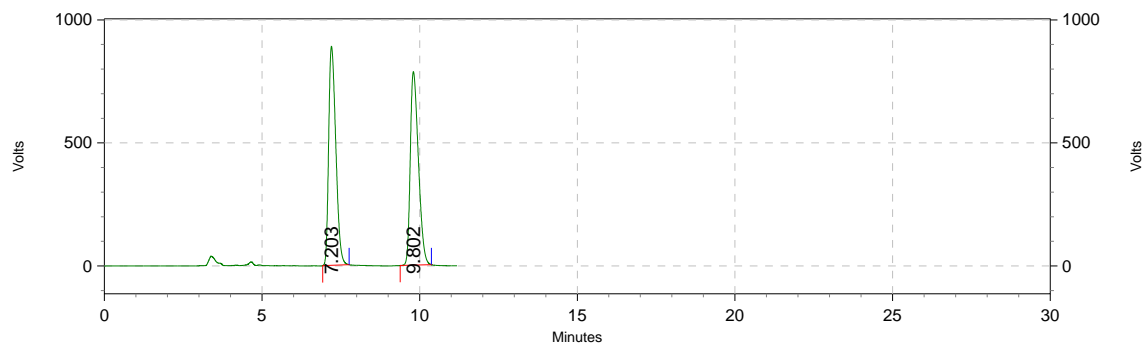

| Peaks | Ret. Time | Area     | Area%  |
|-------|-----------|----------|--------|
| 1     | 7.203     | 13971763 | 49.843 |
| 2     | 9.802     | 14059761 | 50.157 |

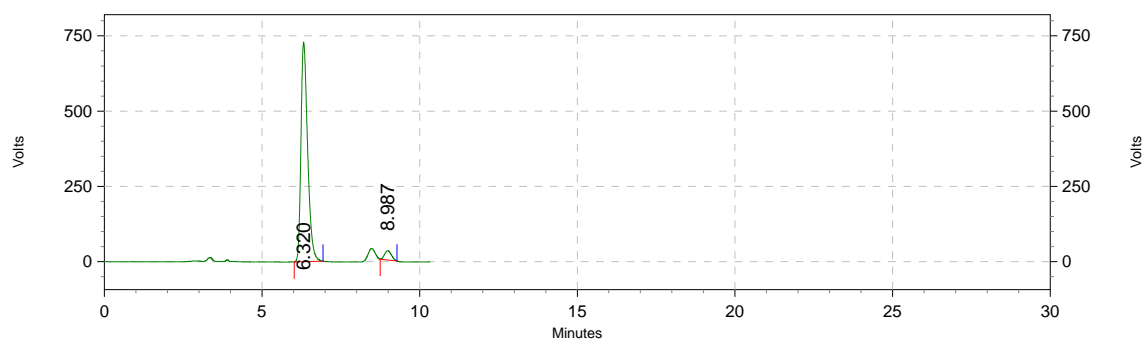

| Peaks | Ret. Time | Area     | Area%  |
|-------|-----------|----------|--------|
| 1     | 6.320     | 10680211 | 95.801 |
| 2     | 8.987     | 468120   | 4.199  |

**(S)-tert-butyl-(1-benzyl-3-(tert-butylperoxy)-7-chloro-2-oxoindolin-3-yl)carbamate (4g)**

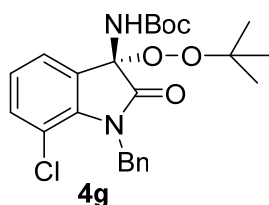

White solid, 84% yield, 90% ee, mp 125-127 °C.  $[\alpha]_D^{20} = -3.81$  (c = 1.8, CH<sub>2</sub>Cl<sub>2</sub>). <sup>1</sup>H NMR (400 MHz, CDCl<sub>3</sub>) δ 7.57 (d, J = 5.7 Hz, 1H), 7.20 (s, 4H), 7.10 (d, J = 8.2 Hz, 2H), 6.89 (t, J = 7.6 Hz, 1H), 5.81 (s, 1H), 5.31 (d, J = 16.3 Hz, 1H), 5.23 (d, J = 16.3 Hz, 1H), 1.28 (s, 9H), 1.07 (s, 9H). <sup>13</sup>C {<sup>1</sup>H} NMR (100 MHz, CDCl<sub>3</sub>) δ 171.2, 153.1, 139.2, 137.1, 133.2, 129.5, 128.5, 127.1, 126.4, 125.5, 123.6, 115.5, 86.6, 81.8, 81.0, 45.1, 28.1, 26.3. HRMS-ESI (m/z): [M+Na]<sup>+</sup> calcd for C<sub>24</sub>H<sub>29</sub>ClN<sub>2</sub>NaO<sub>5</sub><sup>+</sup> 483.1657, found 483.1662. The ee value was

determined by chiral HPLC analysis (Chiralcel IA-H, hexane/*i*-PrOH = 80/20 flow rate = 1.0 mL/min,  $\lambda = 254$  nm). Retention times:  $t_R = 5.5$  min for (*S*)-isomer and  $t_R = 10.6$  min for (*R*)-isomer.

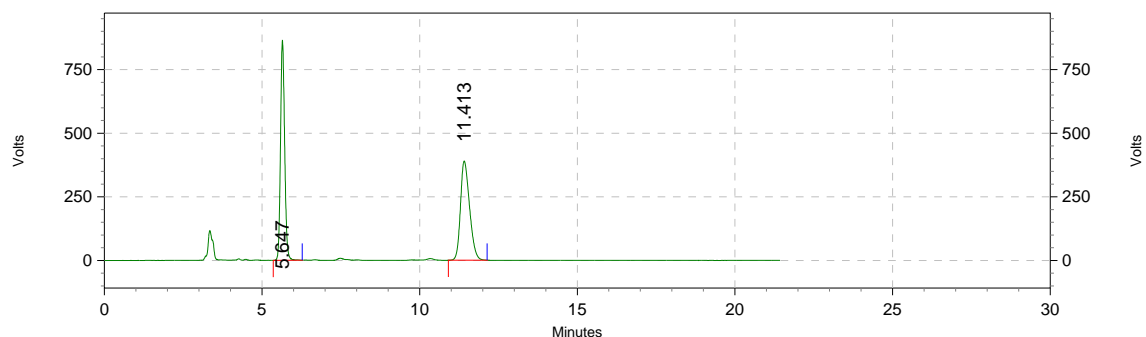

| Peaks | Ret. Time | Area    | Area%  |
|-------|-----------|---------|--------|
| 1     | 5.647     | 7901627 | 50.344 |
| 2     | 11.413    | 7793574 | 49.656 |

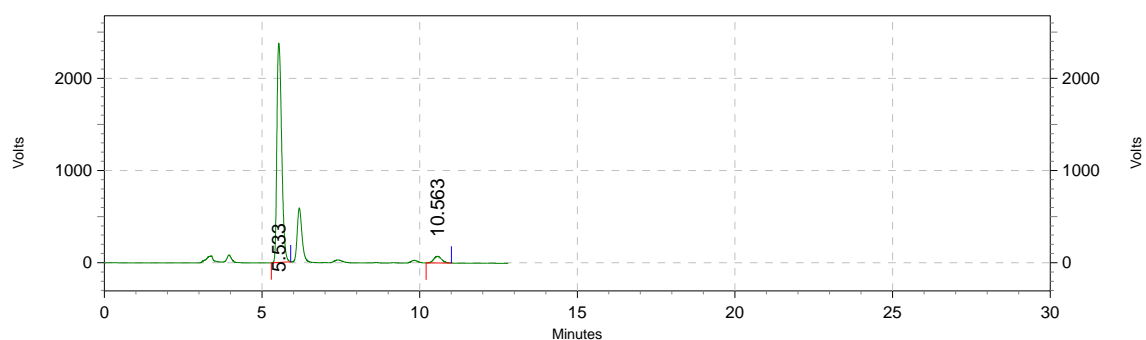

| Peaks | Ret. Time | Area     | Area%  |
|-------|-----------|----------|--------|
| 1     | 5.533     | 24988804 | 95.140 |
| 2     | 10.563    | 1276597  | 4.860  |

**(*S*)-tert-butyl-(1-benzyl-5-bromo-3-(tert-butylperoxy)-2-oxoindolin-3-yl)carbamate(4h)**

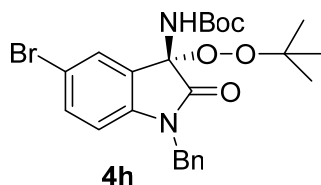

White solid, 89% yield, 96% ee, mp 142-144 °C.  $[\alpha]_D^{20} = -10.25$  ( $c = 2.4$ ,  $\text{CH}_2\text{Cl}_2$ ).  $^1\text{H}$  NMR (400 MHz,  $\text{CDCl}_3$ )  $\delta$  7.93 (s, 1H), 7.32 (dd,  $J = 8.3, 2.1$  Hz, 1H), 7.29 (d,  $J = 4.5$  Hz, 4H), 7.25 (dd,  $J = 8.9, 4.7$  Hz, 1H), 6.51 (d,  $J = 8.3$  Hz, 1H), 5.87 (s, 1H), 5.06 (d,  $J = 16.0$  Hz, 1H), 4.75 (d,  $J = 16.0$  Hz, 1H), 1.39 (s, 9H), 1.17 (s, 9H).  $^{13}\text{C}$   $\{^1\text{H}\}$  NMR (100 MHz,  $\text{CDCl}_3$ )  $\delta$

170.2, 153.2, 142.1, 134.7, 133.3, 130.5, 128.8, 127.8, 127.0, 115.4, 110.9, 87.0, 81.8, 81.0, 44.0, 28.2, 26.3. HRMS-ESI (m/z):  $[M+Na]^+$  calcd for  $C_{24}H_{29}BrN_2NaO_5^+$  527.1152, found 527.1157. The ee value was determined by chiral HPLC analysis (Chiralcel IA, hexane/i-PrOH = 80/20 flow rate = 1.0 mL/min,  $\lambda = 254$  nm). Retention times:  $t_R = 5.7$  min for (*S*)-isomer and  $t_R = 9.5$  min for (*R*)-isomer.

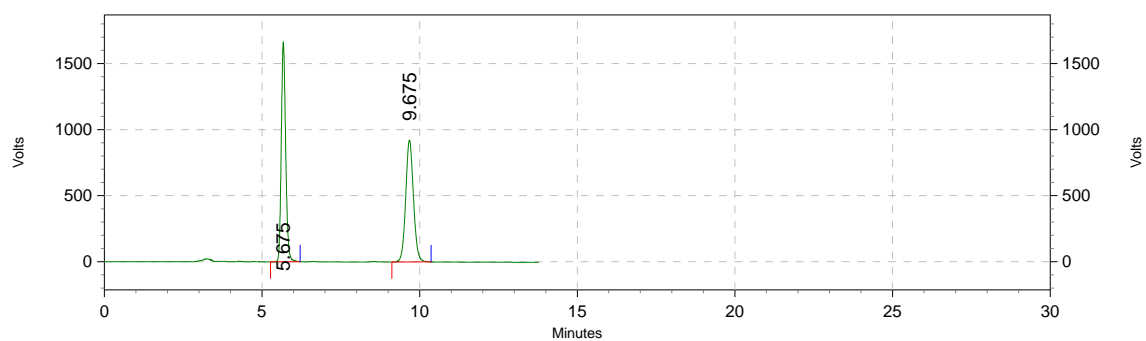

| Peaks | Ret. Time | Area     | Area%  |
|-------|-----------|----------|--------|
| 1     | 5.675     | 16130018 | 50.626 |
| 2     | 9.675     | 15730928 | 49.374 |

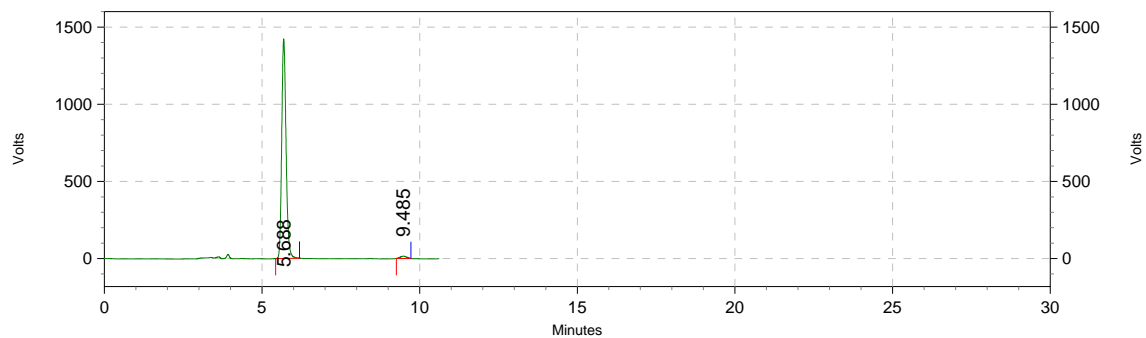

| Peaks | Ret. Time | Area     | Area%  |
|-------|-----------|----------|--------|
| 1     | 5.688     | 13622732 | 98.505 |
| 2     | 9.485     | 206735   | 1.495  |



**(S)-tert-butyl-(1-benzyl-6-bromo-3-(tert-butylperoxy)-2-oxoindolin-3-yl)carbamate (4i)**

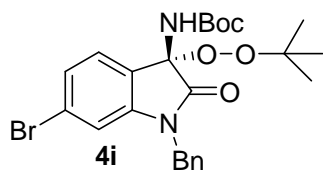

White solid, 75% yield, 86% ee, mp 114-116 °C.  $[\alpha]_D^{20} = +4.50$  (c = 2.0, CH<sub>2</sub>Cl<sub>2</sub>). <sup>1</sup>H NMR (400 MHz, CDCl<sub>3</sub>) δ 7.69 (d, J = 7.8 Hz, 1H), 7.30 (d, J = 4.4 Hz, 4H), 7.25 (d, J = 4.6 Hz, 1H), 7.17 (dd, J = 8.0, 1.6 Hz, 1H), 6.80 (d, J = 1.6 Hz, 1H), 5.91 (s, 1H), 5.05 (d, J = 16.0 Hz, 1H), 4.72 (d, J = 16.0 Hz, 1H), 1.38 (s, 9H), 1.16 (s, 9H). <sup>13</sup>C {<sup>1</sup>H} NMR (100 MHz, CDCl<sub>3</sub>) δ 170.6, 153.2, 144.4, 134.6, 128.9, 127.8, 124.4, 112.7, 86.8, 81.7, 80.9, 43.9, 28.2, 26.3. HRMS-ESI (m/z): [M+Na]<sup>+</sup> calcd for C<sub>24</sub>H<sub>29</sub>BrN<sub>2</sub>NaO<sub>5</sub><sup>+</sup> 527.1152, found 527.1157. The ee value was determined by chiral HPLC analysis (Chiralcel IA, hexane/i-PrOH = 80/20 flow rate = 1.0 mL/min, λ = 254 nm). Retention times: t<sub>R</sub> = 6.1 min for (*S*)-isomer and t<sub>R</sub> = 8.1 min for (*R*)-isomer.

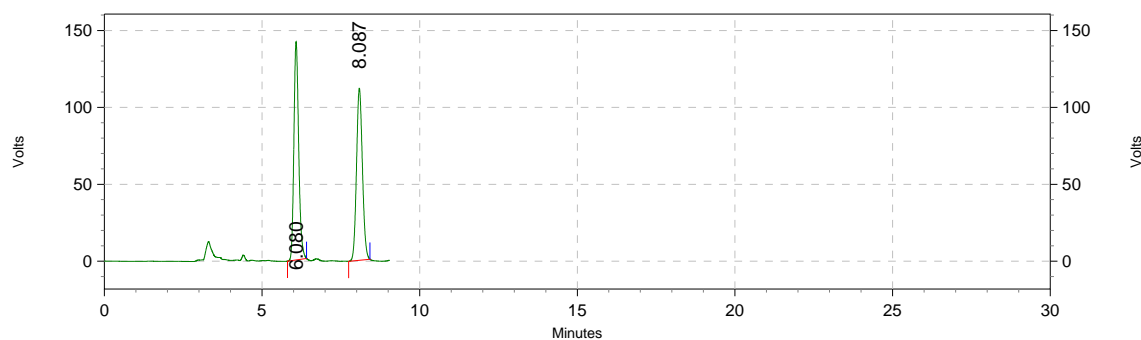

| Peaks | Ret. Time | Area    | Area%  |
|-------|-----------|---------|--------|
| 1     | 6.080     | 1496785 | 50.742 |
| 2     | 8.087     | 1452989 | 49.258 |

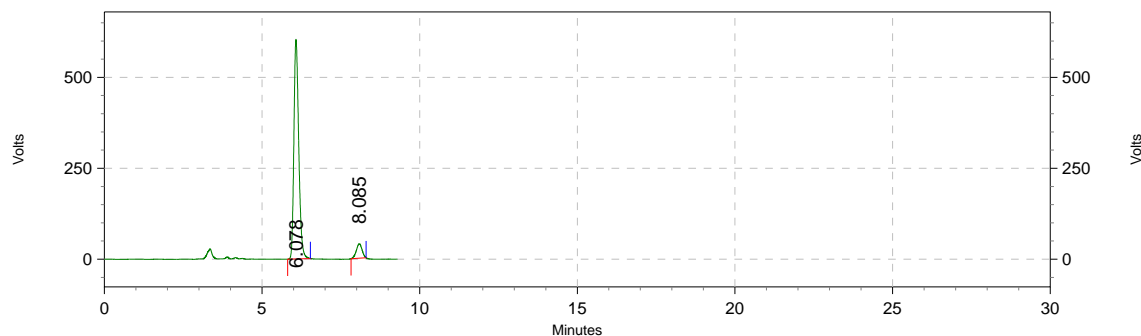

| Peaks | Ret. Time | Area    | Area%  |
|-------|-----------|---------|--------|
| 1     | 6.078     | 6405098 | 92.727 |
| 2     | 8.085     | 502371  | 7.273  |

**(S)-tert-butyl-(1-benzyl-3-(tert-butoxymethyl)-5-fluoro-2-oxindolin-3-yl)carbamate (4j)**

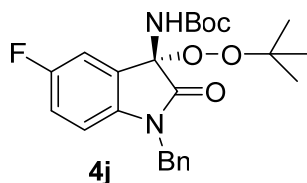

White solid, 89% yield, 94% ee, mp 113-115 °C.  $[\alpha]_{\text{D}}^{20} = -15.34$  (c = 2.0, CH<sub>2</sub>Cl<sub>2</sub>). <sup>1</sup>H NMR (400 MHz, CDCl<sub>3</sub>) δ 7.63 (d, J = 6.7 Hz, 1H), 7.29 (d, J = 4.4 Hz, 5H), 6.90 (td, J = 8.8, 2.7 Hz, 1H), 6.55 (dd, J = 8.6, 4.1 Hz, 1H), 5.89 (s, 1H), 5.07 (d, J = 16.0 Hz, 1H), 4.74 (d, J = 16.0 Hz, 1H), 1.39 (s, 9H), 1.17 (s, 9H). <sup>13</sup>C {<sup>1</sup>H} NMR (100 MHz, CDCl<sub>3</sub>) δ 170.5, 159.0 (d, <sup>1</sup>J<sub>C-F</sub> = 241.0 Hz), 153.2, 139.0, 134.9, 128.8, 127.7, 127.1, 116.7 (d, <sup>2</sup>J<sub>C-F</sub> = 23.2 Hz), 115.8 (d, <sup>2</sup>J<sub>C-F</sub> = 25.5 Hz), 109.9 (d, <sup>3</sup>J<sub>C-F</sub> = 7.7 Hz), 87.1, 81.7, 80.9, 44.0, 28.2, 26.3. <sup>19</sup>F NMR (CDCl<sub>3</sub>) δ -120.0. HRMS-ESI (m/z): [M+Na]<sup>+</sup> calcd for C<sub>24</sub>H<sub>29</sub>FN<sub>2</sub>NaO<sub>5</sub><sup>+</sup> 467.1953, found 467.1958. The ee value was determined by chiral HPLC analysis (Chiralcel IA, hexane/i-PrOH = 80/20 flow rate = 1.0 mL/min, λ = 254 nm). Retention times: t<sub>R</sub> = 6.2 min for (*S*)-isomer and t<sub>R</sub> = 11.0 min for (*R*)-isomer.

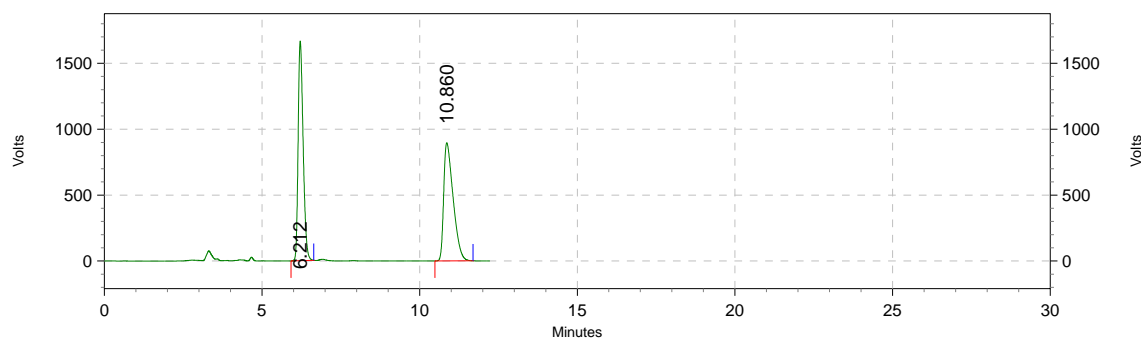

| Peaks | Ret. Time | Area     | Area%  |
|-------|-----------|----------|--------|
| 1     | 6.212     | 18344528 | 49.696 |
| 2     | 10.860    | 18568833 | 50.304 |

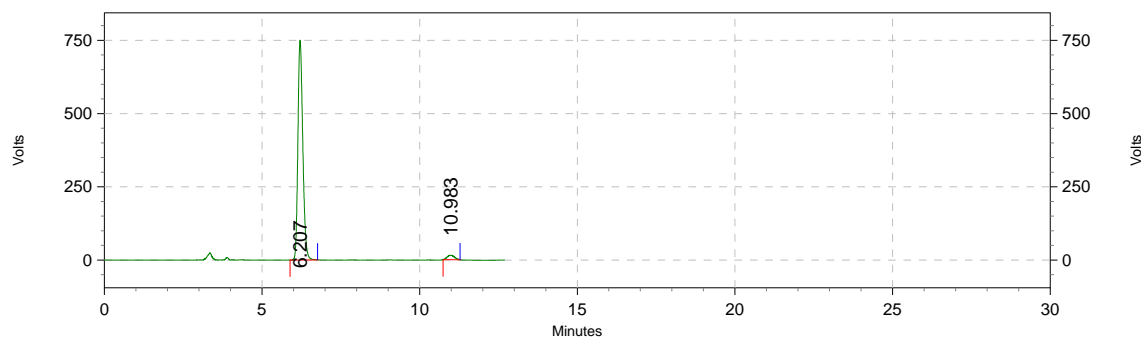

| Peaks | Ret. Time | Area    | Area%  |
|-------|-----------|---------|--------|
| 1     | 6.207     | 8066786 | 97.043 |
| 2     | 10.983    | 245803  | 2.957  |

**(S)-tert-butyl-(1-benzyl-3-(tert-butylperoxy)-6-fluoro-2-oxindolin-3-yl)carbamate (4k)**

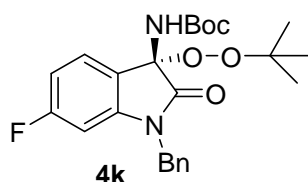

White solid, 88% yield, 92% ee, mp 110-112 °C.  $[\alpha]_D^{20} = -2.55$  (c = 2.0, CH<sub>2</sub>Cl<sub>2</sub>). <sup>1</sup>H NMR (400 MHz, CDCl<sub>3</sub>) δ 7.75 – 7.65 (m, 1H), 7.25 – 7.13 (m, 5H), 6.65 – 6.55 (m, 1H), 6.29 (dd, J = 8.8, 2.1 Hz, 1H), 5.83 (s, 1H), 4.96 (d, J = 16.0 Hz, 1H), 4.63 (d, J = 15.9 Hz, 1H), 1.28 (s, 9H), 1.07 (s, 9H). <sup>13</sup>C {<sup>1</sup>H} NMR (100 MHz, CDCl<sub>3</sub>) δ 171.0, 164.2 (d, <sup>1</sup>J<sub>C-F</sub> = 247.8 Hz), 153.2, 144.9 (d, <sup>3</sup>J<sub>C-F</sub> = 11.4 Hz), 134.7, 129.1 (d, <sup>3</sup>J<sub>C-F</sub> = 8.7 Hz), 128.9, 127.8, 127.1, 120.8, 108.8 (d, <sup>2</sup>J<sub>C-F</sub> = 21.9 Hz), 98.2 (d, <sup>2</sup>J<sub>C-F</sub> = 27.5 Hz), 86.8, 81.6, 80.8, 44.0, 28.1, 26.3. <sup>19</sup>F NMR (CDCl<sub>3</sub>) δ -108.2. HRMS-ESI (m/z): [M+Na]<sup>+</sup> calcd for C<sub>24</sub>H<sub>29</sub>FN<sub>2</sub>NaO<sub>5</sub><sup>+</sup> 467.1953, found 467.1958. The ee value was determined by chiral HPLC analysis (Chiralcel IA, hexane/i-PrOH = 80/20 flow rate = 1.0 mL/min, λ = 254 nm). Retention times: t<sub>R</sub> = 6.0 min for (*S*)-isomer and t<sub>R</sub> = 8.5 min for (*R*)-isomer.

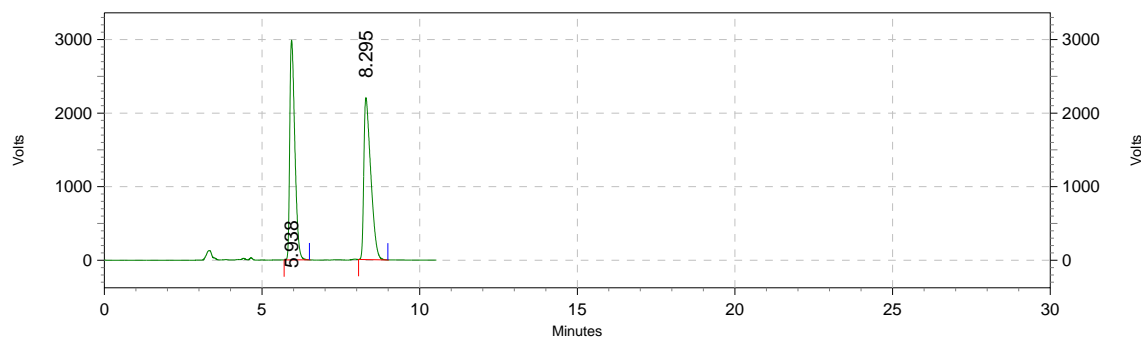

| Peaks | Ret. Time | Area     | Area%  |
|-------|-----------|----------|--------|
| 1     | 5.938     | 33480556 | 49.805 |
| 2     | 8.295     | 33742819 | 50.195 |

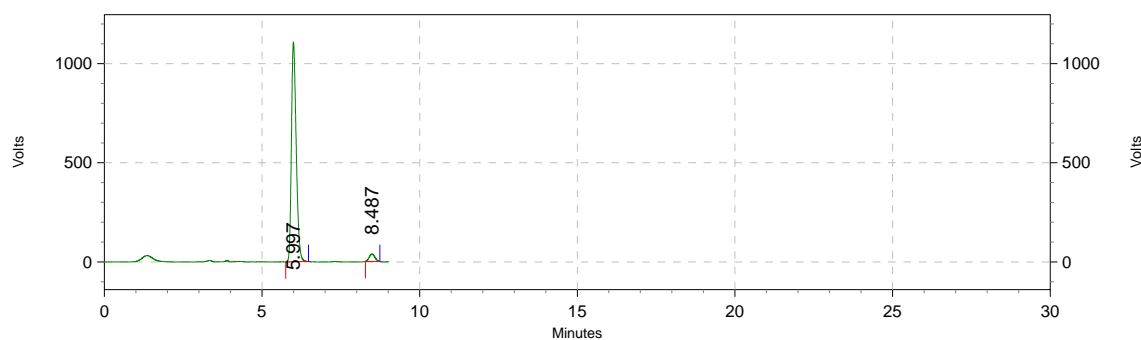

| Peaks | Ret. Time | Area     | Area%  |
|-------|-----------|----------|--------|
| 1     | 5.997     | 11689604 | 96.104 |
| 2     | 8.487     | 473890   | 3.896  |

**(S)-tert-butyl-(1-benzyl-3-(tert-butylperoxy)-7-fluoro-2-oxindolin-3-yl)carbamate (4I)**

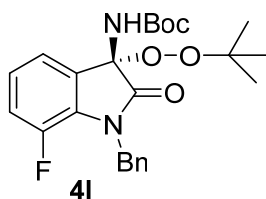

White solid, 88% yield, 95% ee, mp 109-111 °C.  $[\alpha]_D^{20} = -4.87$  ( $c = 1.0$ ,  $\text{CH}_2\text{Cl}_2$ ).  $^1\text{H}$  NMR (400 MHz,  $\text{CDCl}_3$ )  $\delta$  7.47 (s, 1H), 7.28 (d,  $J = 6.6$  Hz, 2H), 7.19 (dt,  $J = 11.8, 7.4$  Hz, 3H), 6.91 (d,  $J = 7.2$  Hz, 2H), 5.79 (s, 1H), 5.09 (d,  $J = 15.5$  Hz, 1H), 4.88 (d,  $J = 15.5$  Hz, 1H), 1.27 (s, 9H), 1.06 (s, 9H).  $^{13}\text{C}$   $\{^1\text{H}\}$  NMR (100 MHz,  $\text{CDCl}_3$ )  $\delta$  170.4, 153.1, 147.4 (d,  $^1J_{\text{C-F}} = 244.2$  Hz), 136.5, 129.7 (d,  $^3J_{\text{C-F}} = 8.9$  Hz), 129.5, 128.5, 127.5, 127.2, 123.3 (d,  $^3J_{\text{C-F}} = 6.0$  Hz), 123.0, 118.8 (d,  $^2J_{\text{C-F}} = 19.5$  Hz), 87.1, 81.7, 80.9, 45.6, 28.1, 26.2.  $^{19}\text{F}$  NMR ( $\text{CDCl}_3$ )  $\delta$

-134.0. HRMS-ESI (m/z):  $[M+Na]^+$  calcd for  $C_{24}H_{29}FN_2NaO_5^+$  467.1953, found 467.1956. The ee value was determined by chiral HPLC analysis (Chiralcel IA, hexane/i-PrOH = 80/20 flow rate = 1.0 mL/min,  $\lambda = 254$  nm). Retention times:  $t_R = 5.7$  min for (*S*)-isomer and  $t_R = 12.4$  min for (*R*)-isomer.

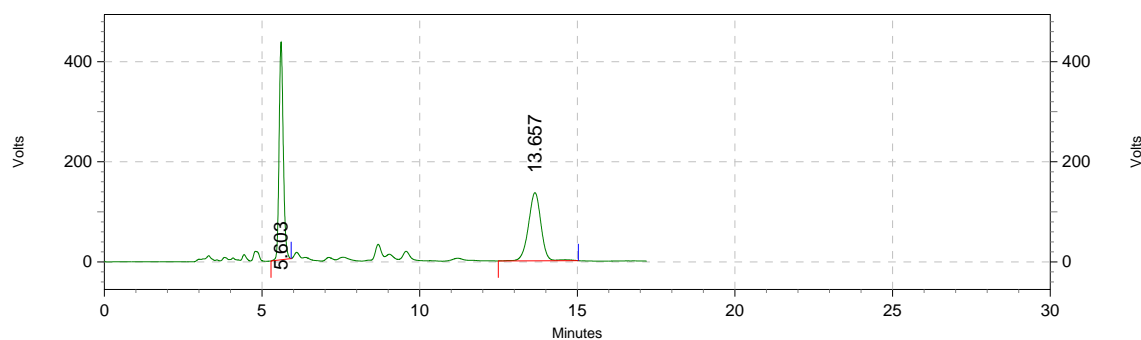

| Peaks | Ret. Time | Area    | Area%  |
|-------|-----------|---------|--------|
| 1     | 5.603     | 4005885 | 51.582 |
| 2     | 13.657    | 3760162 | 48.418 |

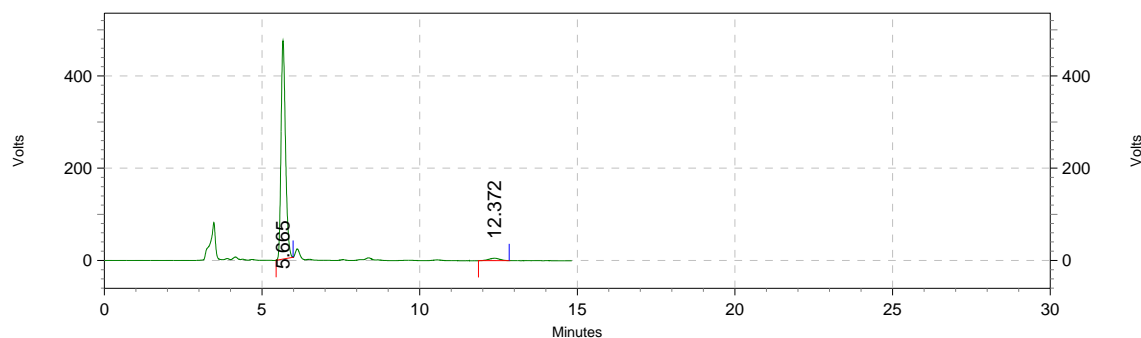

| Peaks | Ret. Time | Area    | Area%  |
|-------|-----------|---------|--------|
| 1     | 5.665     | 4640253 | 97.380 |
| 2     | 12.372    | 124826  | 2.620  |

**(*S*)-tert-butyl-(1-benzyl-3-(tert-butylperoxy)-5-methoxy-2-oxindolin-3-yl)carbamate**

**(4m)**

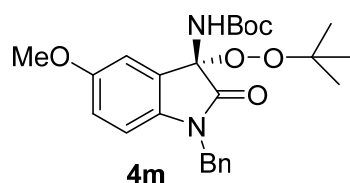

White solid, 86% yield, 91% ee, mp 137-139 °C.  $[\alpha]_D^{20} = -7.84$  (c = 1.0,  $CH_2Cl_2$ ).  $^1H$  NMR

(400 MHz, CDCl<sub>3</sub>) δ 7.37 (s, 1H), 7.23 – 7.14 (m, 5H), 6.66 (dd, J = 8.5, 2.7 Hz, 1H), 6.45 (d, J = 8.5 Hz, 1H), 5.80 (s, 1H), 4.98 (d, J = 15.9 Hz, 1H), 4.65 (d, J = 15.9 Hz, 1H), 3.67 (s, 3H), 1.29 (s, 9H), 1.09 (s, 9H). <sup>13</sup>C {<sup>1</sup>H} NMR (100 MHz, CDCl<sub>3</sub>) δ 170.5, 155.8, 153.2, 136.4, 135.3, 128.7, 127.6, 127.1, 126.6, 115.2, 114.4, 109.7, 87.6, 81.5, 80.7, 55.8, 43.9, 28.2, 26.3. HRMS-ESI (m/z): [M+Na]<sup>+</sup> calcd for C<sub>25</sub>H<sub>32</sub>N<sub>2</sub>NaO<sub>6</sub><sup>+</sup> 479.2153, found 479.2156. The ee value was determined by chiral HPLC analysis (Chiralcel IA, hexane/i-PrOH = 80/20 flow rate = 1.0 mL/min, λ = 254 nm). Retention times: t<sub>R</sub> = 7.4 min for (*S*)-isomer and t<sub>R</sub> = 21.2 min for (*R*)-isomer.

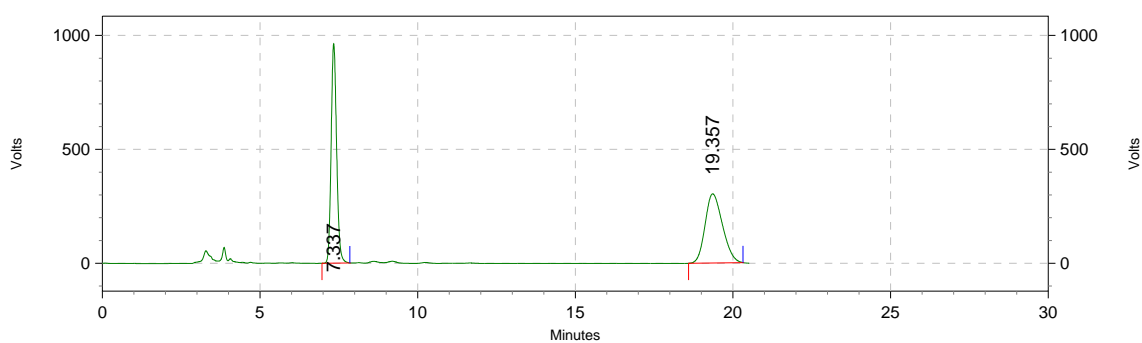

| Peaks | Ret. Time | Area     | Area%  |
|-------|-----------|----------|--------|
| 1     | 7.337     | 11652083 | 50.065 |
| 2     | 19.357    | 11621983 | 49.935 |

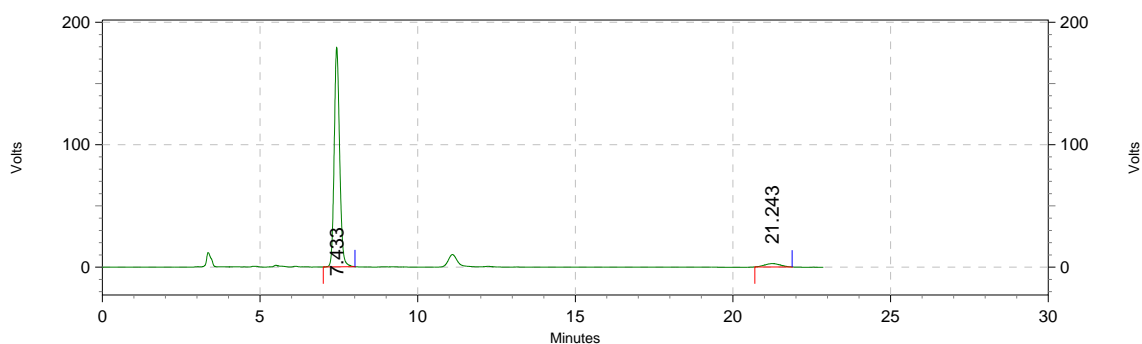

| Peaks | Ret. Time | Area    | Area%  |
|-------|-----------|---------|--------|
| 1     | 7.433     | 2146151 | 95.784 |
| 2     | 21.243    | 94454   | 4.216  |

**(S)-tert-butyl-(1-benzyl-3-(tert-butylperoxy)-7-methoxy-2-oxoindolin-3-yl)carbamate**

**(4n)**

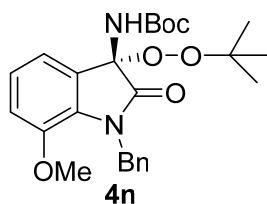

Yellow oil, 83% yield, 91% ee.  $[\alpha]_D^{20} = -1.26$  ( $c = 1.0$ ,  $\text{CH}_2\text{Cl}_2$ ).  $^1\text{H}$  NMR (400 MHz,  $\text{CDCl}_3$ )  $\delta$  7.38 (d,  $J = 6.6$  Hz, 1H), 7.31 (d,  $J = 7.2$  Hz, 2H), 7.27 – 7.17 (m, 3H), 6.98 (t,  $J = 7.9$  Hz, 1H), 6.84 (d,  $J = 8.3$  Hz, 1H), 5.88 (s, 1H), 5.25 – 5.10 (m, 2H), 3.58 (s, 3H), 1.34 (s, 9H), 1.14 (s, 9H).  $^{13}\text{C}$   $\{^1\text{H}\}$  NMR (100 MHz,  $\text{CDCl}_3$ )  $\delta$  170.9, 153.2, 145.0, 138.0, 131.2, 128.2, 126.9, 123.2, 119.8, 115.0, 87.3, 81.4, 80.6, 55.8, 45.9, 29.7, 28.1, 26.3. HRMS-ESI ( $m/z$ ):  $[\text{M}+\text{Na}]^+$  calcd for  $\text{C}_{25}\text{H}_{32}\text{N}_2\text{NaO}_6^+$  479.2153, found 479.2155. The ee value was determined by chiral HPLC analysis (Chiralcel IA, hexane/*i*-PrOH = 80/20 flow rate = 1.0 mL/min,  $\lambda = 254$  nm). Retention times:  $t_R = 6.3$  min for (*S*)-isomer and  $t_R = 20.6$  min for (*R*)-isomer.

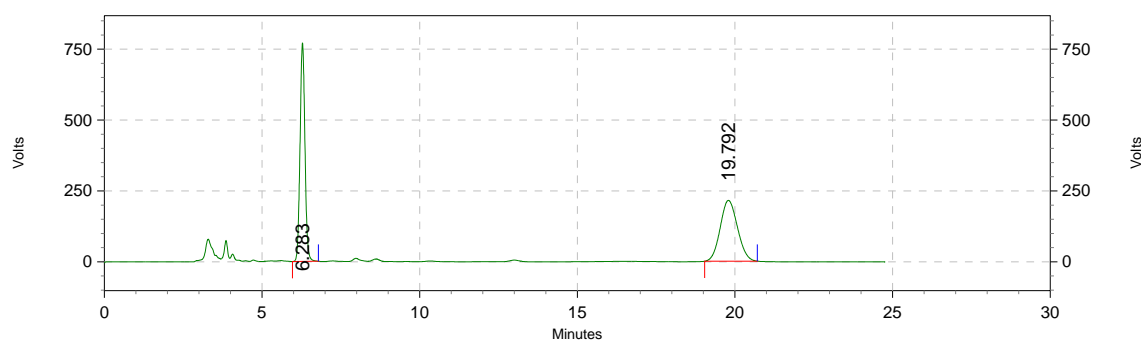

| Peaks | Ret. Time | Area    | Area%  |
|-------|-----------|---------|--------|
| 1     | 6.283     | 8325774 | 50.545 |
| 2     | 19.792    | 8146350 | 49.455 |

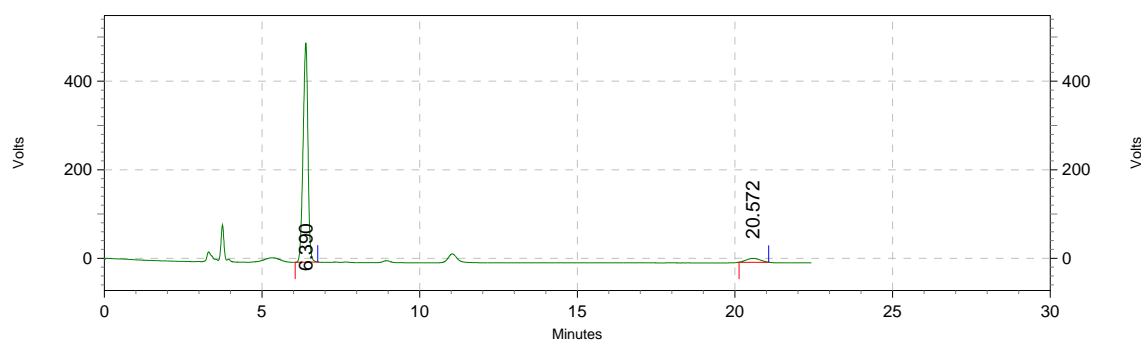

| Peaks | Ret. Time | Area    | Area%  |
|-------|-----------|---------|--------|
| 1     | 6.390     | 5290982 | 95.282 |
| 2     | 20.572    | 261985  | 4.718  |

**(S)-tert-butyl-(1-benzyl-3-(tert-butylperoxy)-5-methyl-2-oxindolin-3-yl)carbamate (4o)**

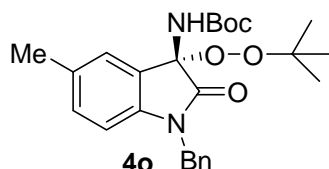

White solid, 84% yield, 96% ee, mp 122-124 °C.  $[\alpha]_D^{20} = -3.54$  (c = 1.0, CH<sub>2</sub>Cl<sub>2</sub>). <sup>1</sup>H NMR (400 MHz, CDCl<sub>3</sub>) δ 7.62 (s, 1H), 7.26 (dd, J = 16.3, 8.7 Hz, 5H), 6.99 (d, J = 7.5 Hz, 1H), 6.52 (d, J = 7.9 Hz, 1H), 5.92 (s, 1H), 5.03 (d, J = 15.9 Hz, 1H), 4.73 (d, J = 15.8 Hz, 1H), 2.29 (s, 3H), 1.37 (s, 9H), 1.17 (s, 9H). <sup>13</sup>C {<sup>1</sup>H} NMR (100 MHz, CDCl<sub>3</sub>) δ 170.7, 153.3, 140.7, 135.4, 132.1, 130.8, 128.7, 128.1, 127.5, 127.1, 125.2, 109.1, 87.4, 81.4, 80.6, 43.8, 28.2, 26.3, 21.1. HRMS-ESI (m/z): [M+Na]<sup>+</sup> calcd for C<sub>25</sub>H<sub>32</sub>N<sub>2</sub>NaO<sub>5</sub><sup>+</sup> 463.2203, found 463.2205. The ee value was determined by chiral HPLC analysis (Chiralcel IA, hexane/i-PrOH = 80/20 flow rate = 1.0 mL/min, λ = 254 nm). Retention times: t<sub>R</sub> = 5.6 min for (*S*)-isomer and t<sub>R</sub> = 12.5 min for (*R*)-isomer.

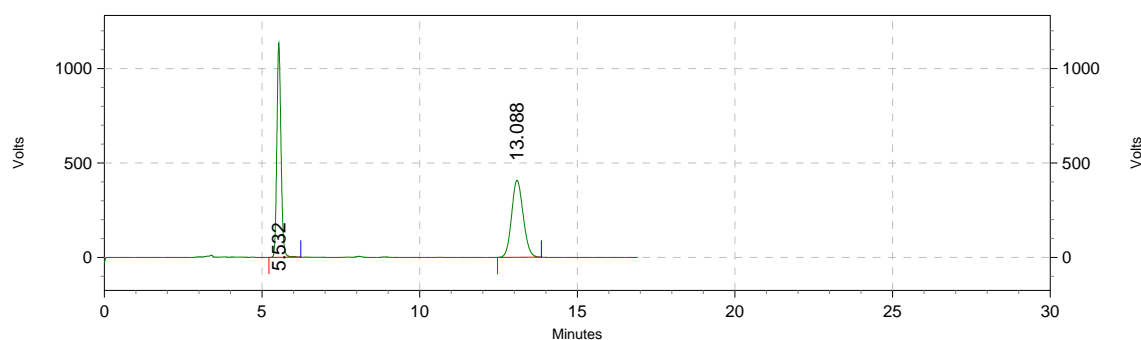

| Peaks | Ret. Time | Area     | Area%  |
|-------|-----------|----------|--------|
| 1     | 5.532     | 10432594 | 50.113 |
| 2     | 13.088    | 10385436 | 49.887 |



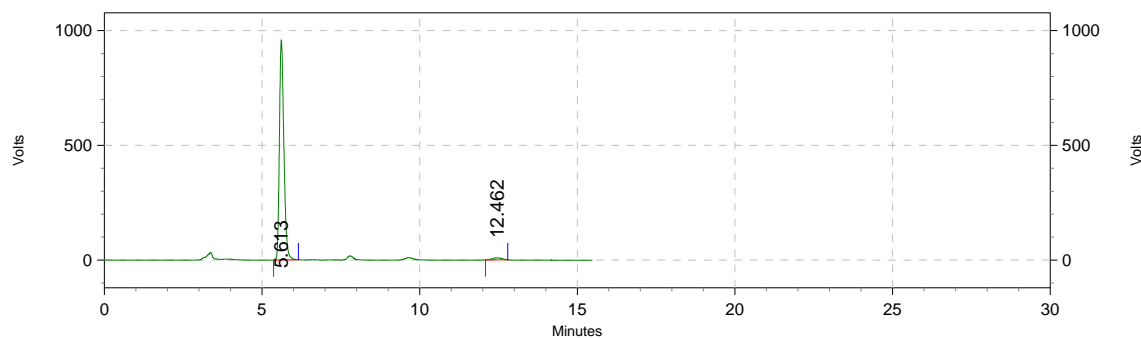

| Peaks | Ret. Time | Area    | Area%  |
|-------|-----------|---------|--------|
| 1     | 5.613     | 9429475 | 98.022 |
| 2     | 12.462    | 190241  | 1.978  |

**(S)-tert-butyl-(1-benzyl-3-(tert-butylperoxy)-7-methyl-2-oxindolin-3-yl)carbamate (4p)**

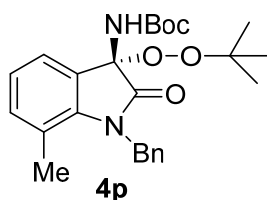

White solid, 83% yield, 91% ee, mp 126-128 °C.  $[\alpha]_D^{20} = +3.35$  (c = 2.2, CH<sub>2</sub>Cl<sub>2</sub>). <sup>1</sup>H NMR (400 MHz, CDCl<sub>3</sub>) δ 7.60 (d, J = 6.6 Hz, 1H), 7.26 (p, J = 8.7, 8.1 Hz, 5H), 7.01 – 6.92 (m, 2H), 5.93 (s, 1H), 5.32 (d, J = 17.0 Hz, 1H), 5.05 (d, J = 17.0 Hz, 1H), 2.21 (s, 3H), 1.37 (s, 9H), 1.18 (s, 9H). <sup>13</sup>C {<sup>1</sup>H} NMR (100 MHz, CDCl<sub>3</sub>) δ 171.6, 153.2, 141.1, 137.2, 134.7, 128.8, 127.2, 126.1, 125.7, 124.9, 122.7, 119.8, 86.9, 81.5, 80.6, 45.2, 28.2, 26.4, 25.9, 18.8. HRMS-ESI (m/z): [M+Na]<sup>+</sup> calcd for C<sub>25</sub>H<sub>32</sub>N<sub>2</sub>NaO<sub>5</sub><sup>+</sup> 463.2203, found 463.2203. The ee value was determined by chiral HPLC analysis (Chiralcel IA, hexane/i-PrOH = 80/20 flow rate = 1.0 mL/min, λ = 254 nm). Retention times: t<sub>R</sub> = 6.0 min for (*S*)-isomer and t<sub>R</sub> = 12.6 min for (*R*)-isomer.

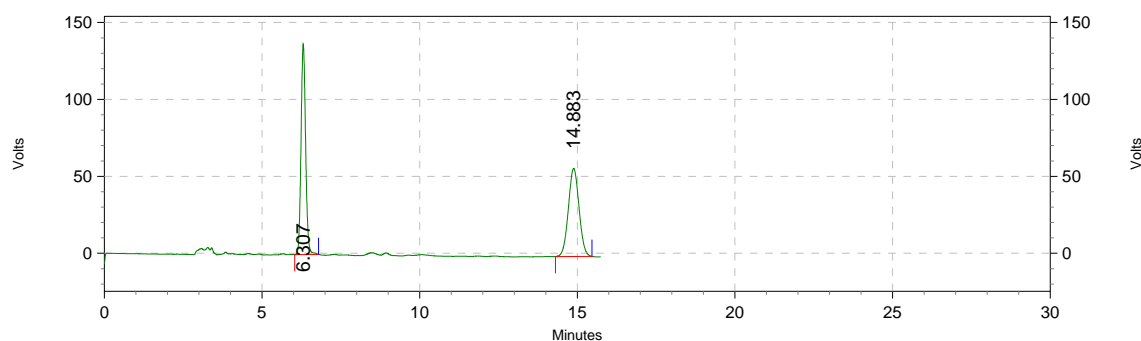

| Peaks | Ret. Time | Area    | Area%  |
|-------|-----------|---------|--------|
| 1     | 6.307     | 1379877 | 50.606 |
| 2     | 14.883    | 1346824 | 49.394 |

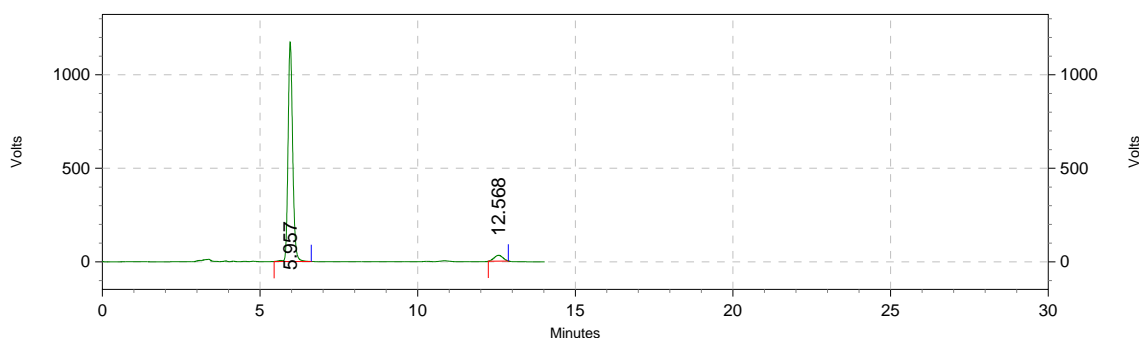

| Peaks | Ret. Time | Area     | Area%  |
|-------|-----------|----------|--------|
| 1     | 5.957     | 11967667 | 95.276 |
| 2     | 12.568    | 593373   | 4.724  |

### Tert-butyl (1-benzyl-3-(tert-butylthio)-2-oxindolin-3-yl)carbamate (**5**)<sup>11</sup>

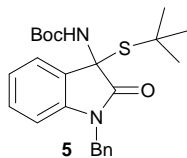

White solid, 93% yield, 0 % ee. m p = 64-66 °C. <sup>1</sup>H NMR (400 MHz, CDCl<sub>3</sub>) δ 7.40 – 7.28 (m, 5H), 7.24 (s, 1H), 7.16 (t, J = 7.5 Hz, 1H), 7.00 (t, J = 7.5 Hz, 1H), 6.64 (d, J = 7.8 Hz, 1H), 5.62 (s, 1H), 5.26 (s, 1H), 4.69 (s, 1H), 1.50 (s, 9H), 1.26 (s, 9H). <sup>13</sup>C {<sup>1</sup>H} NMR (100 MHz, CDCl<sub>3</sub>) δ 174.0, 153.1, 140.9, 135.8, 129.4, 128.8, 127.5, 127.1, 122.8, 109.0, 80.8, 64.8, 50.3, 44.0, 31.7, 28.1. The ee value was determined by chiral HPLC analysis (Chiralcel IC, hexane/i-PrOH = 90/10 flow rate = 1.0 mL/min, λ = 254 nm). Retention times: t<sub>R</sub> = 6.7 min for (S)-isomer and t<sub>R</sub> = 9.3 min for (R)-isomer.

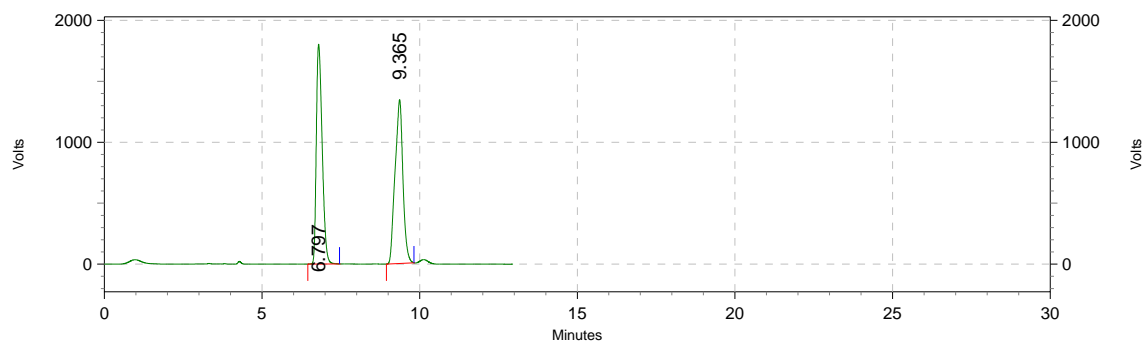

| Peaks | Ret. Time | Area     | Area%  |
|-------|-----------|----------|--------|
| 1     | 6.797     | 23240903 | 50.030 |
| 2     | 9.365     | 23212827 | 49.970 |

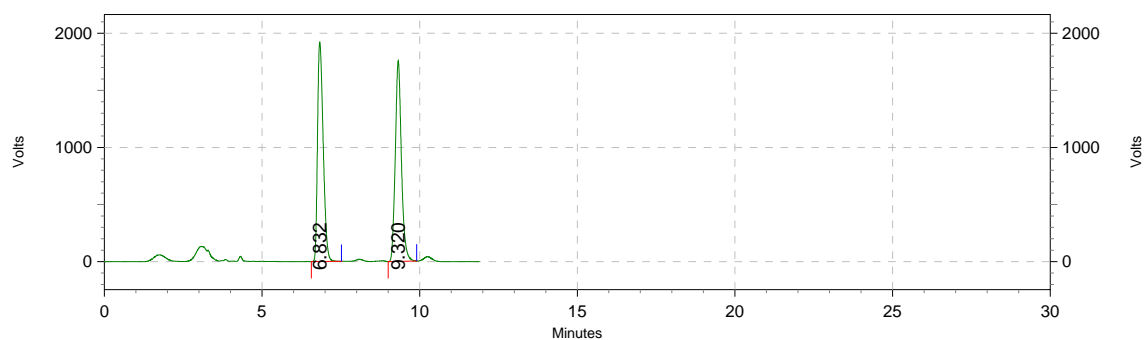

| Peaks | Ret. Time | Area     | Area%  |
|-------|-----------|----------|--------|
| 1     | 6.832     | 23927844 | 50.092 |
| 2     | 9.320     | 23840247 | 49.908 |

### Ethyl benzo[d]isothiazole-3-carboxylate 1,1-dioxide (**6**)

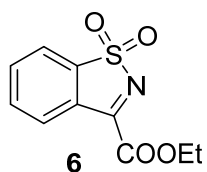

Compound **6** was synthesized according to the known procedures.<sup>12</sup> White solid, 93% yield.

<sup>1</sup>H NMR (400 MHz, CDCl<sub>3</sub>) δ 8.29 (d, *J* = 6.4 Hz, 1H), 7.94 (d, *J* = 6.5 Hz, 1H), 7.81 (d, *J* = 12.6 Hz, 2H), 4.55 (q, *J* = 7.0 Hz, 2H), 1.48 (t, *J* = 7.0 Hz, 3H). <sup>13</sup>C {<sup>1</sup>H} NMR (100 MHz, CDCl<sub>3</sub>) δ 160.4, 160.3, 140.2, 134.5, 134.3, 128.2, 127.7, 123.0, 63.9, 14.0.

### 3. Copies of NMR Spectra of the Products

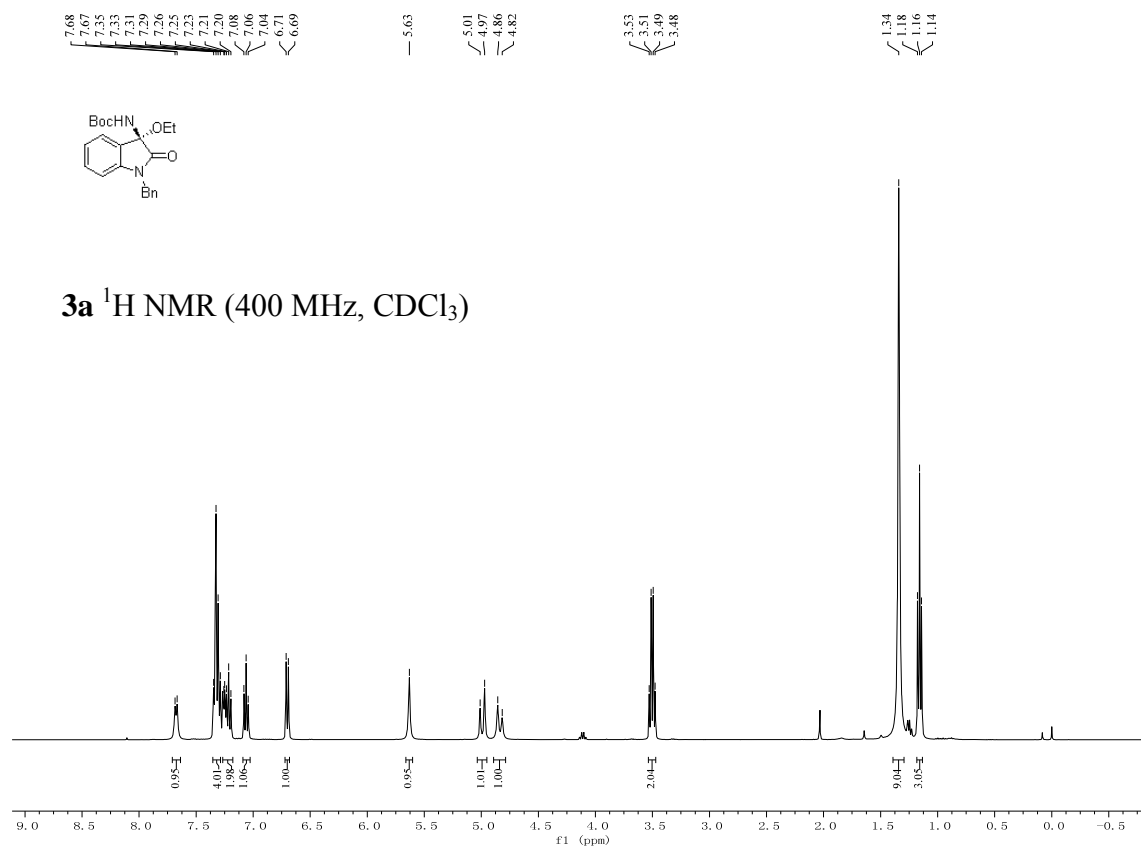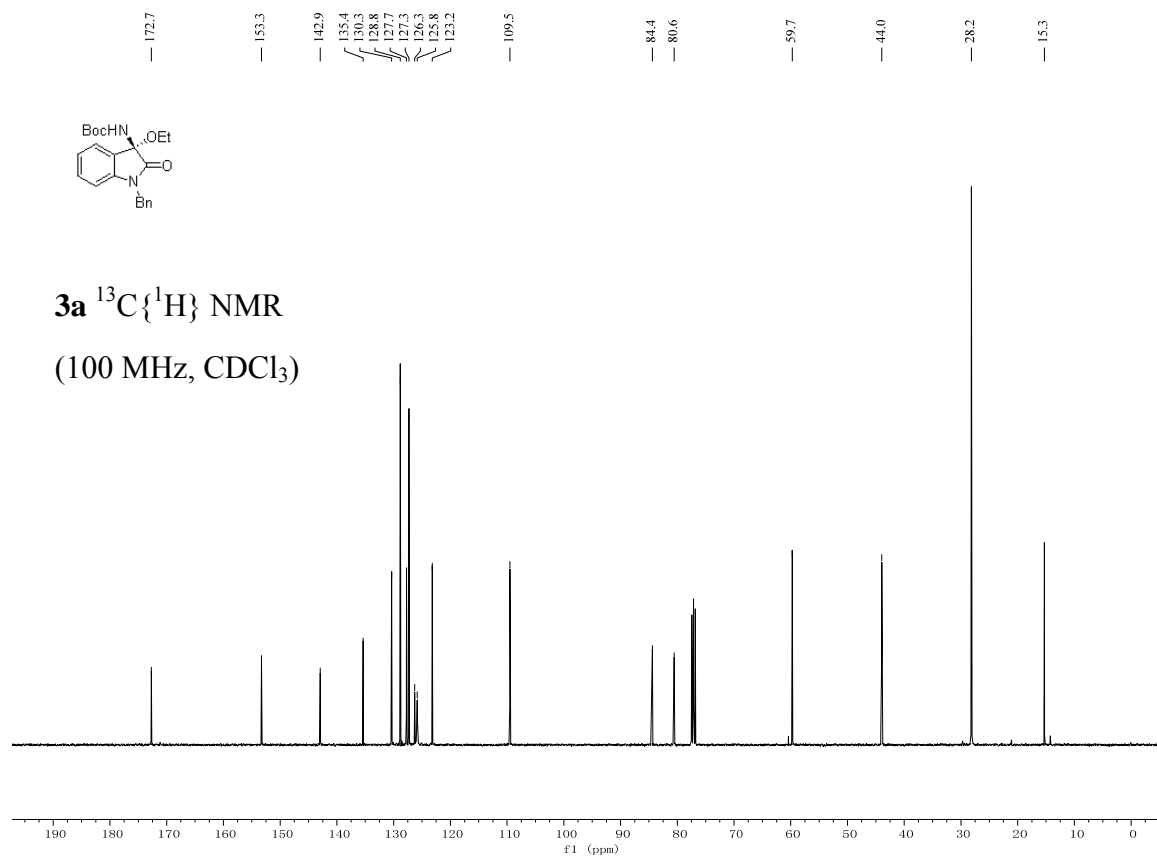

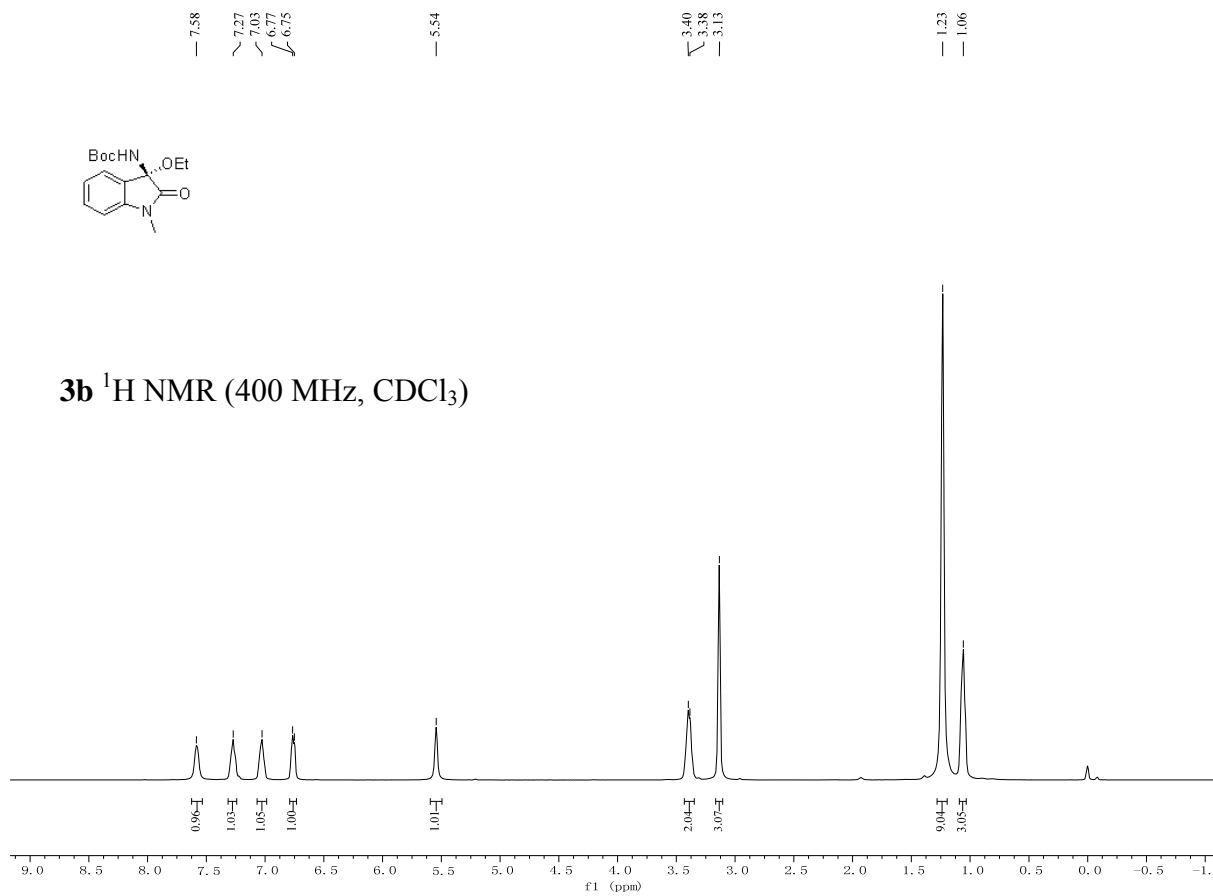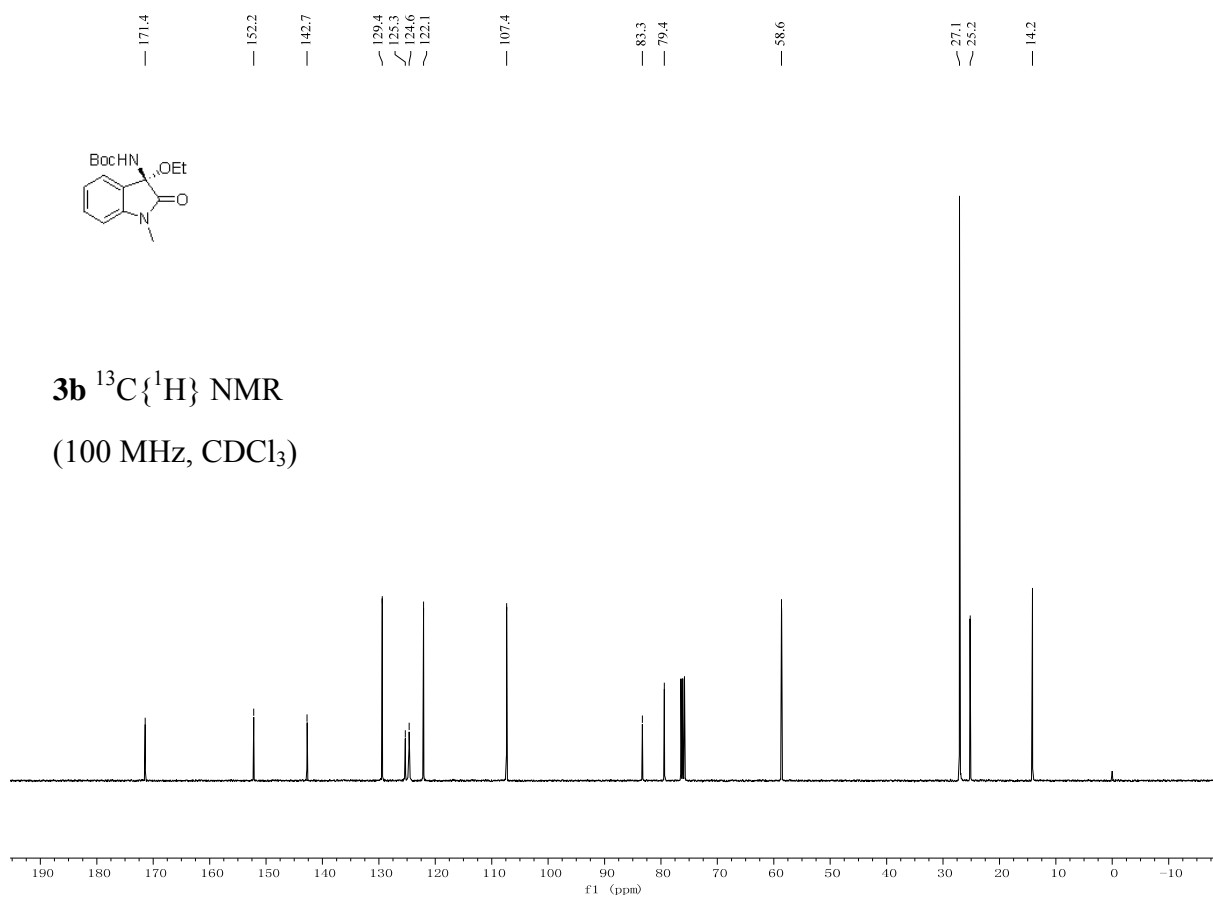

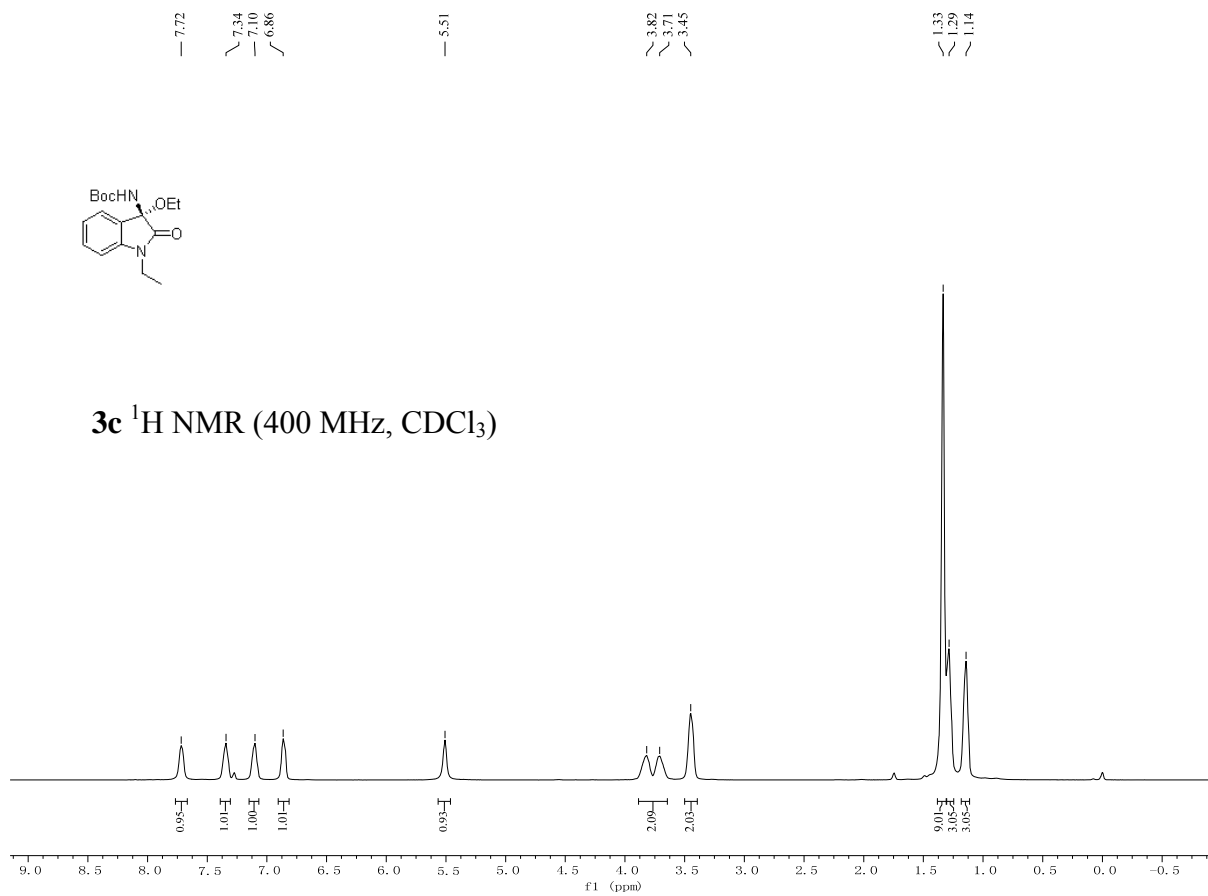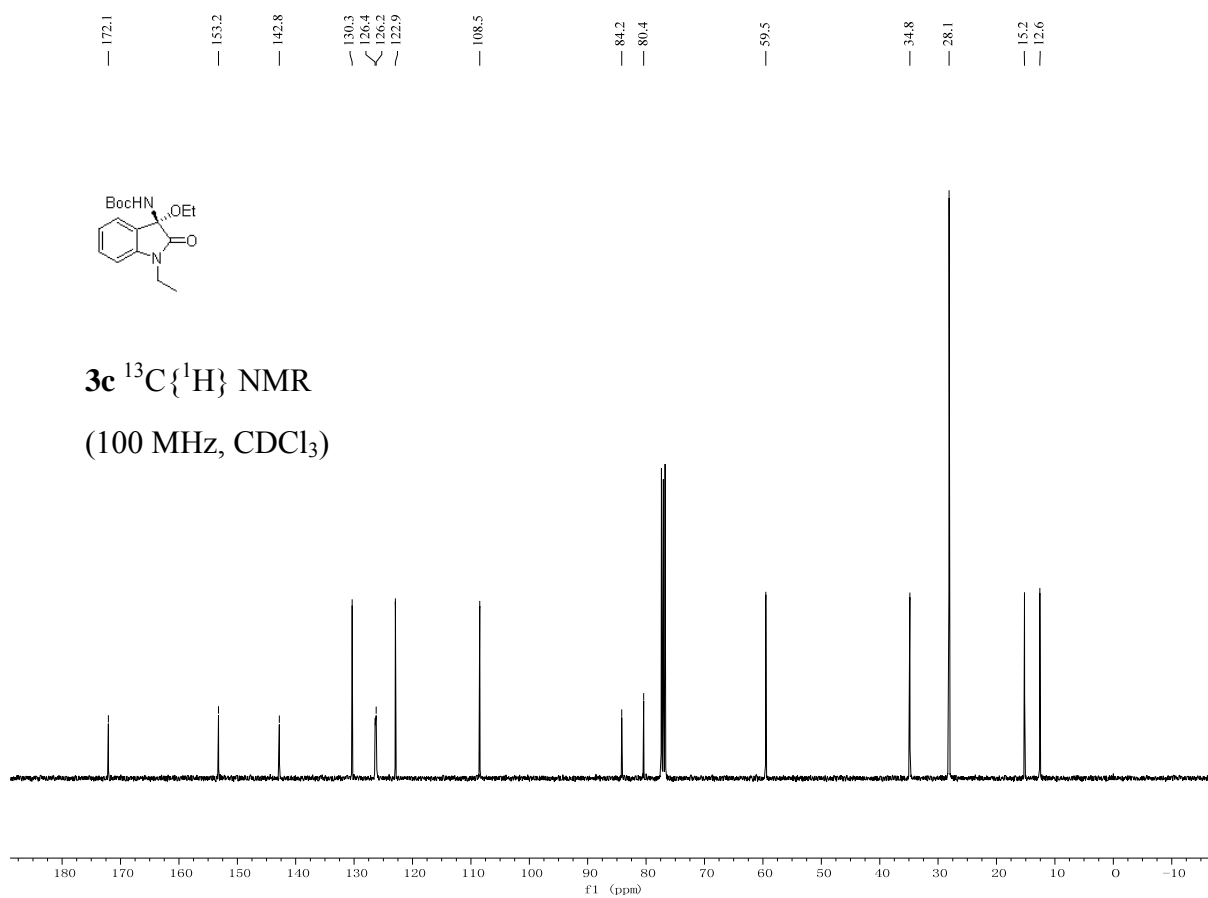

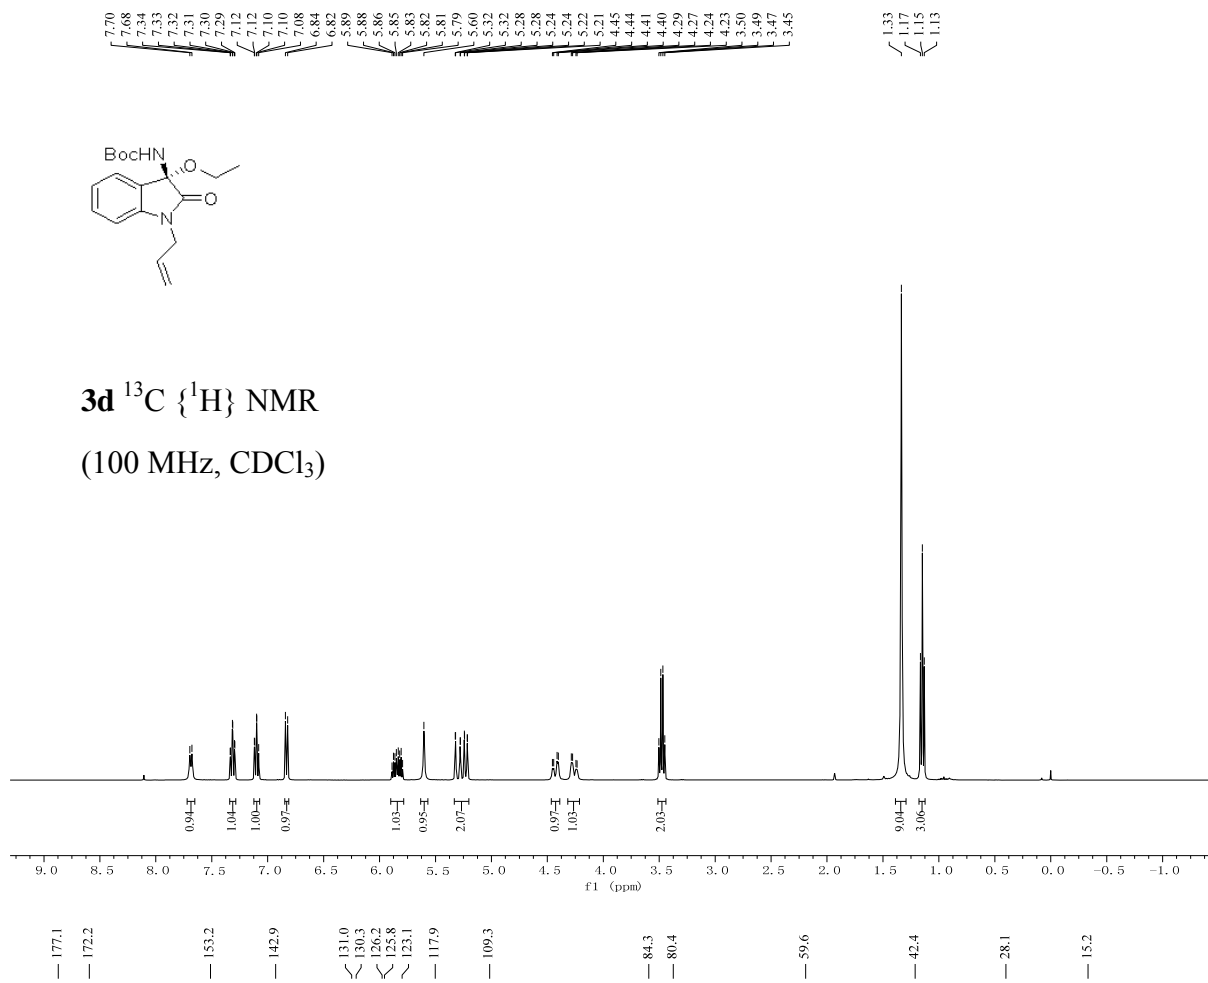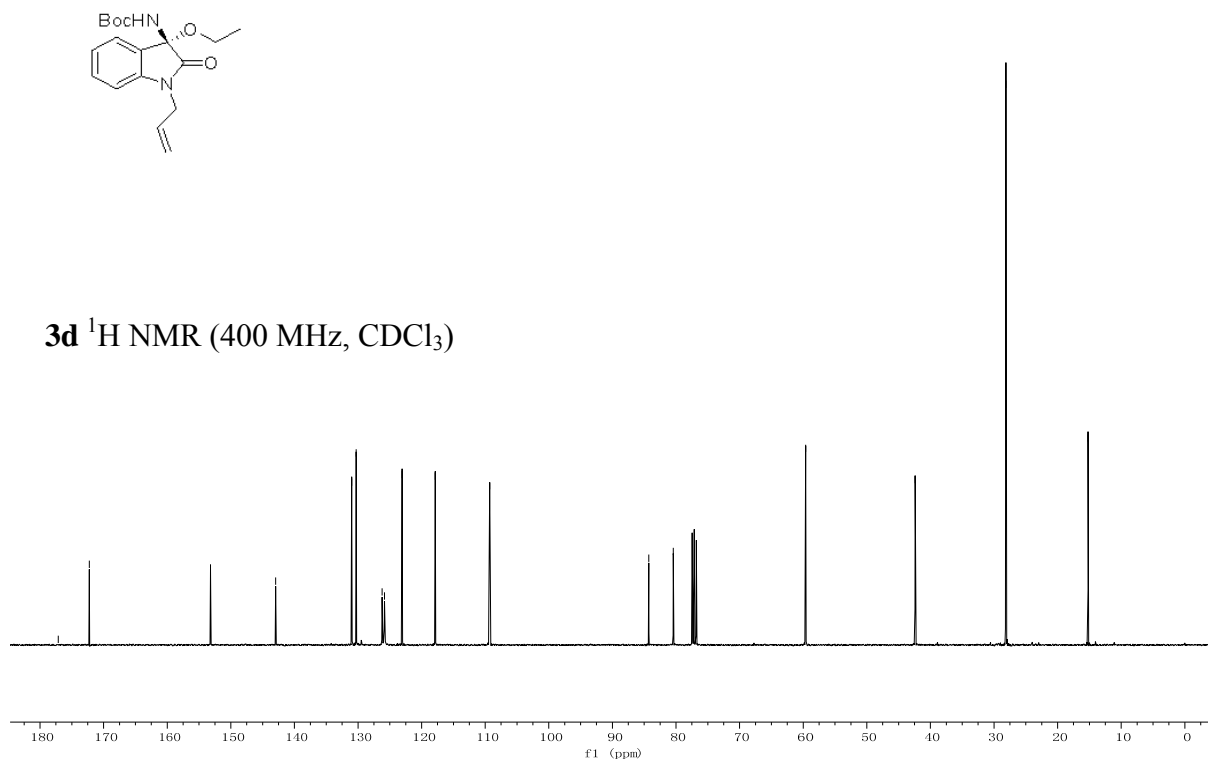

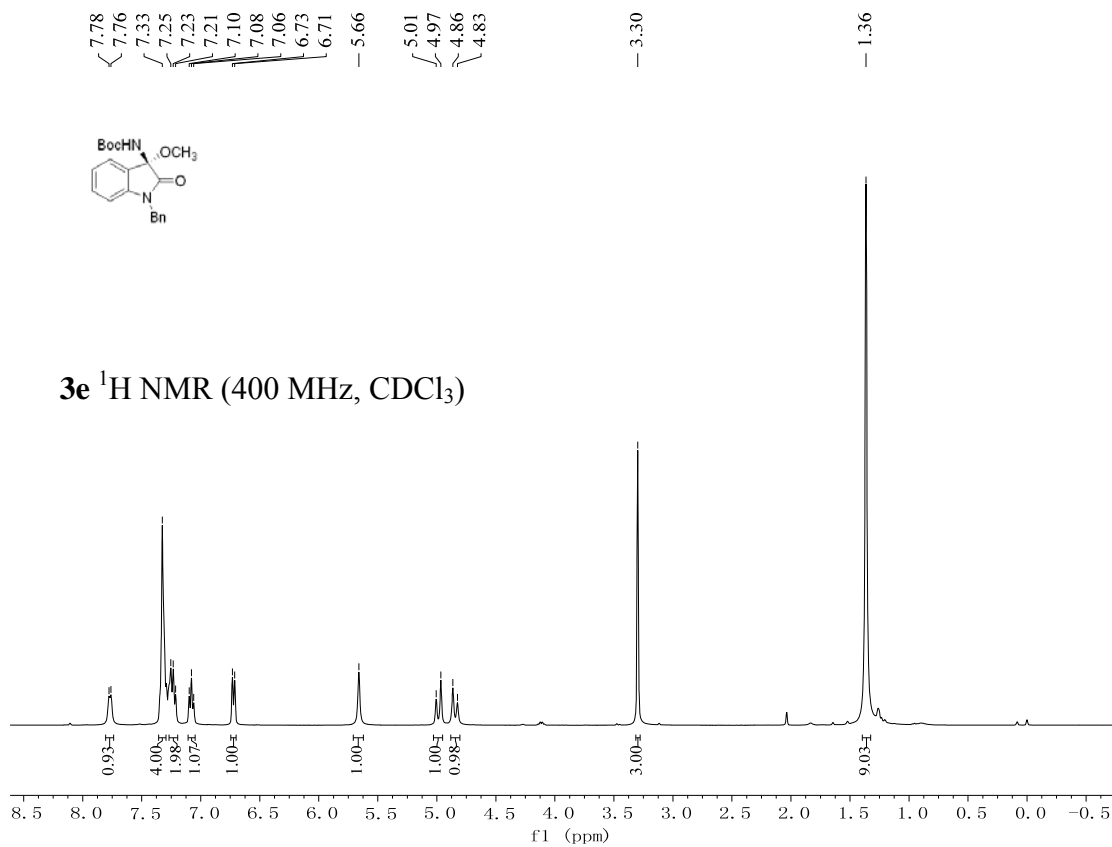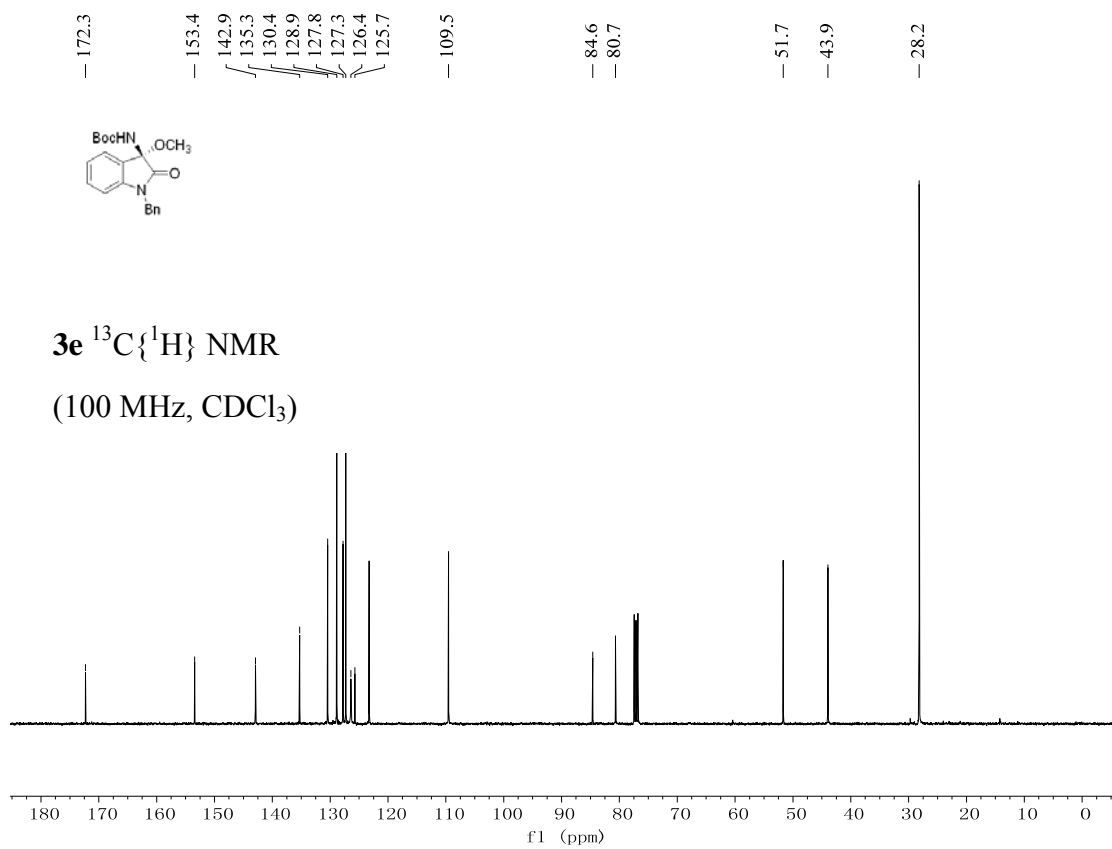



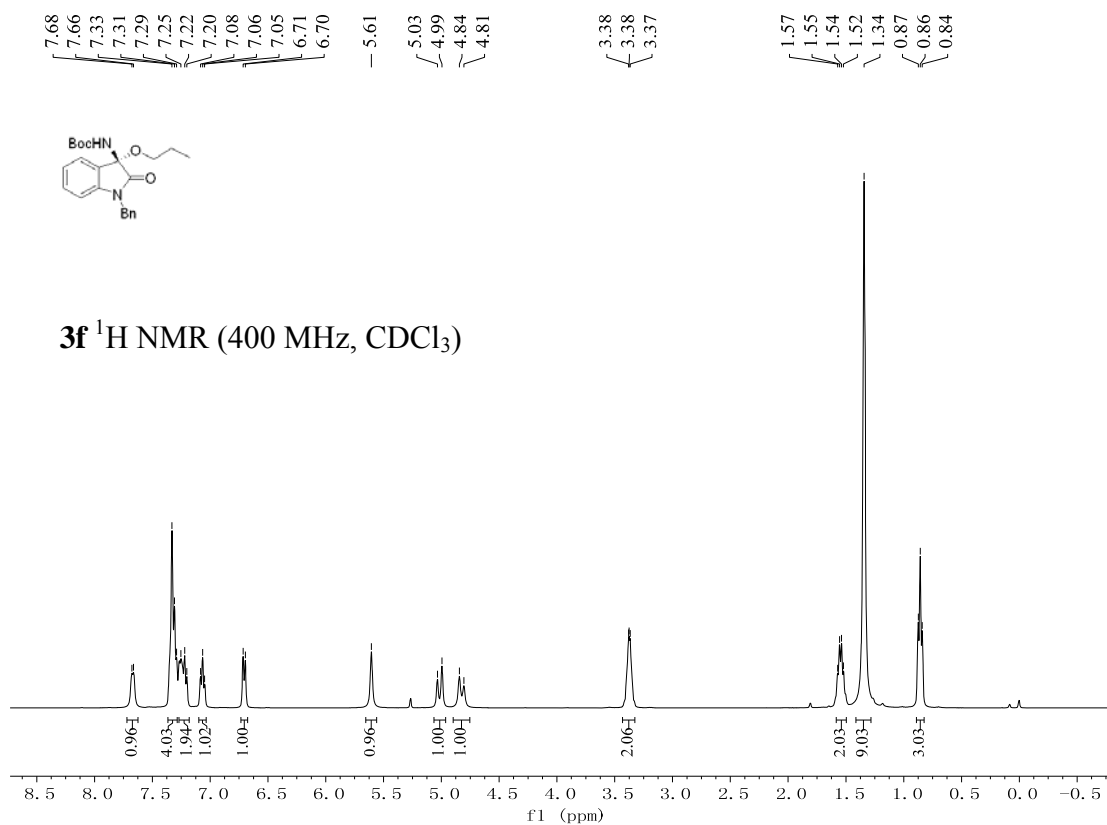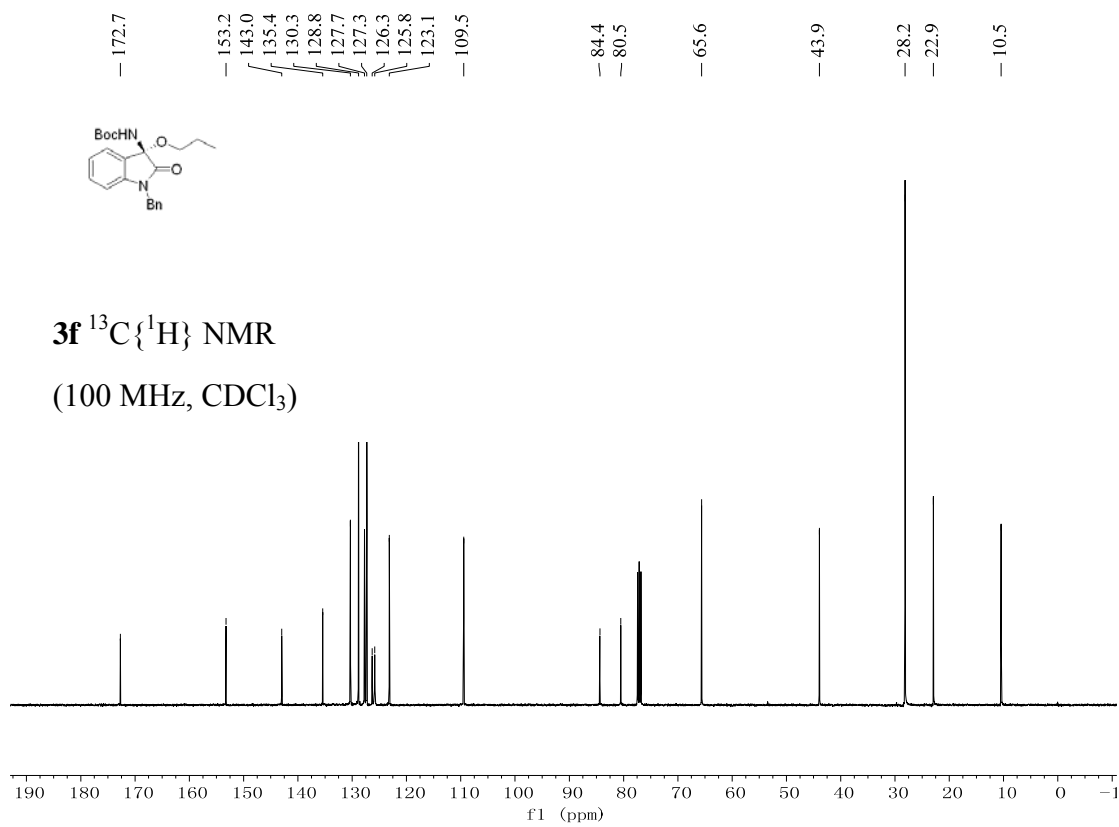

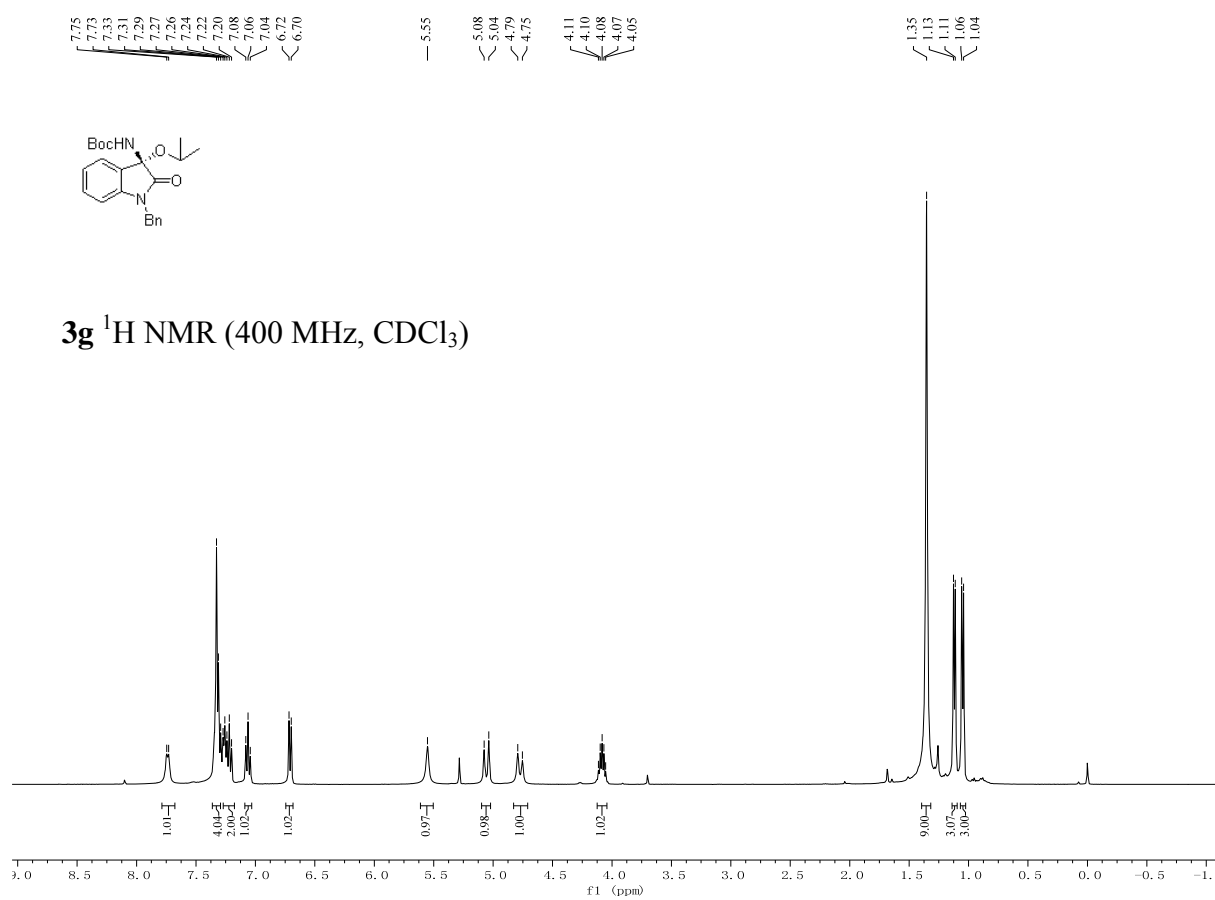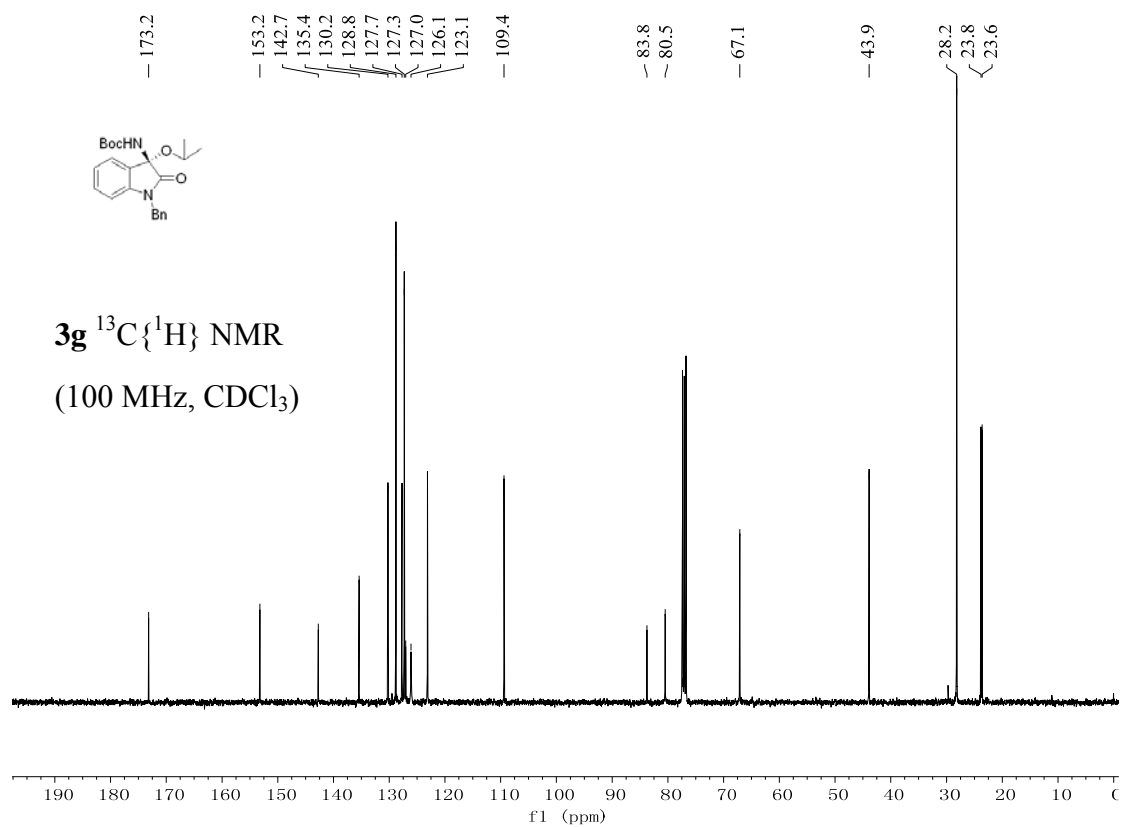

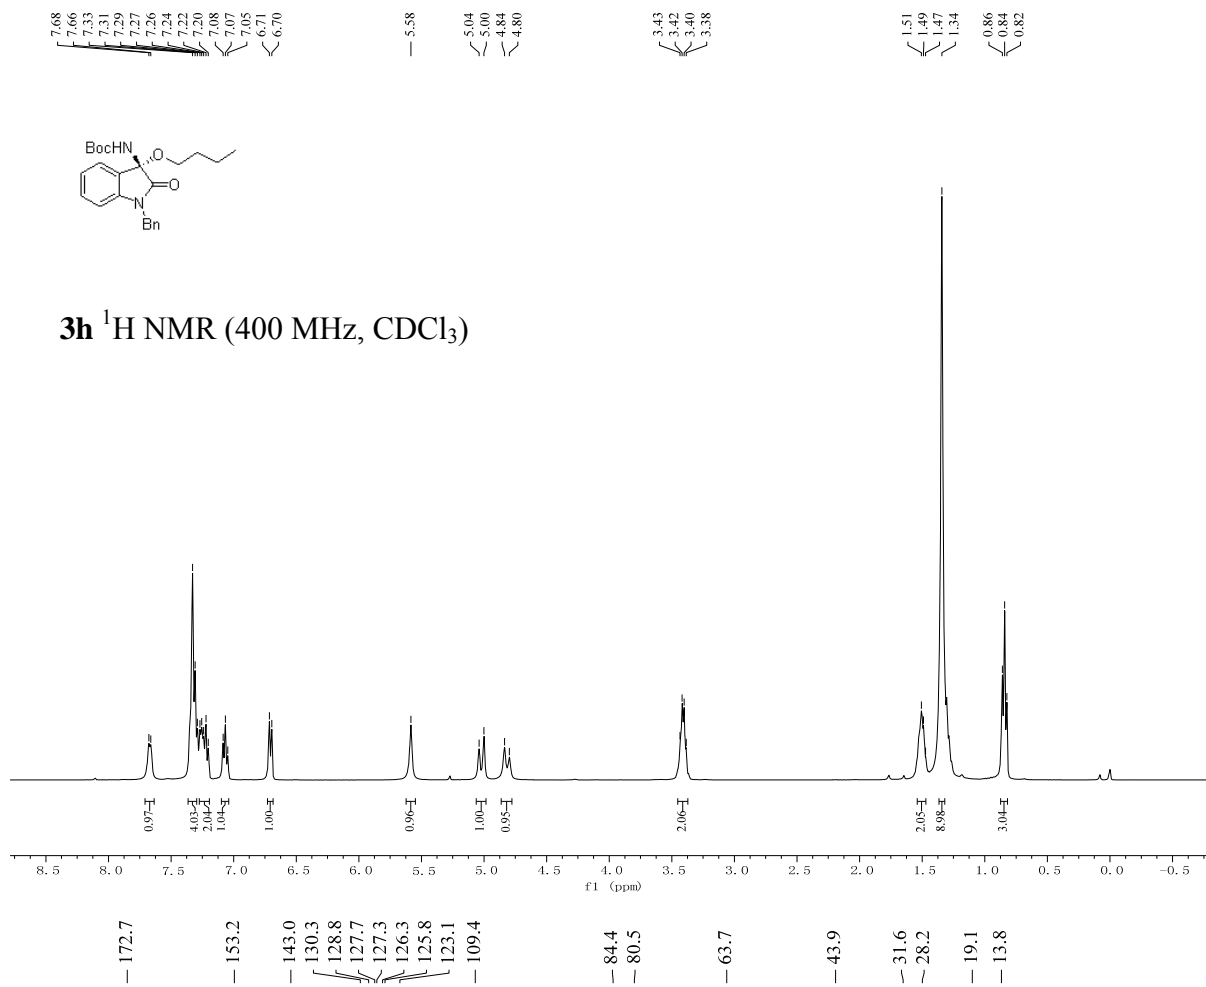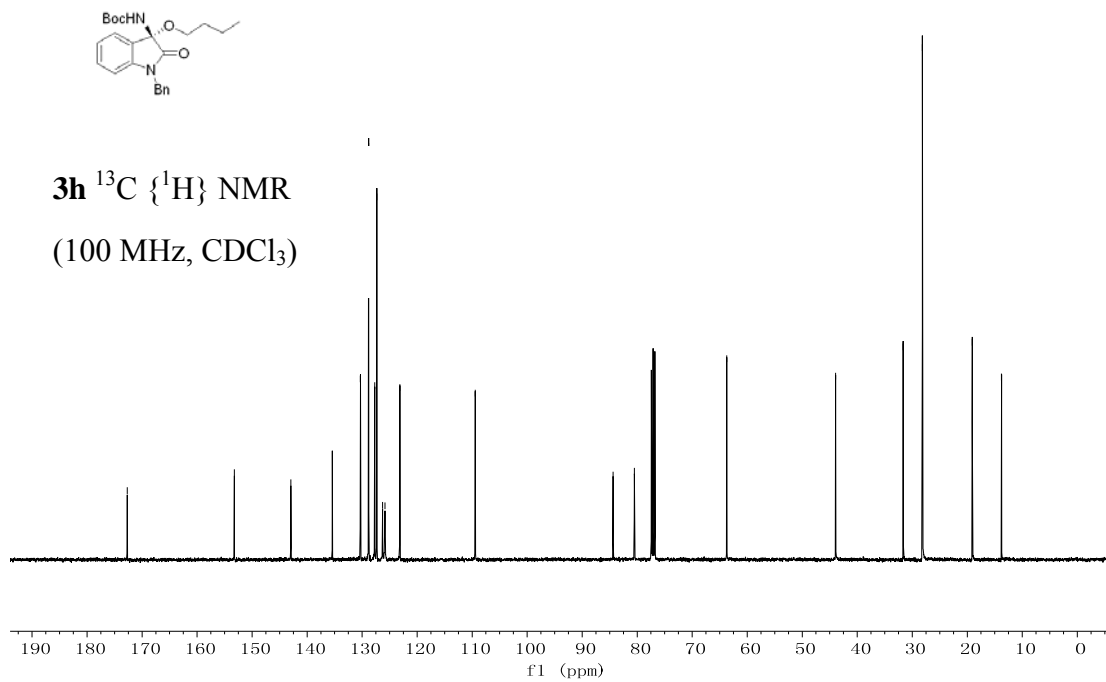

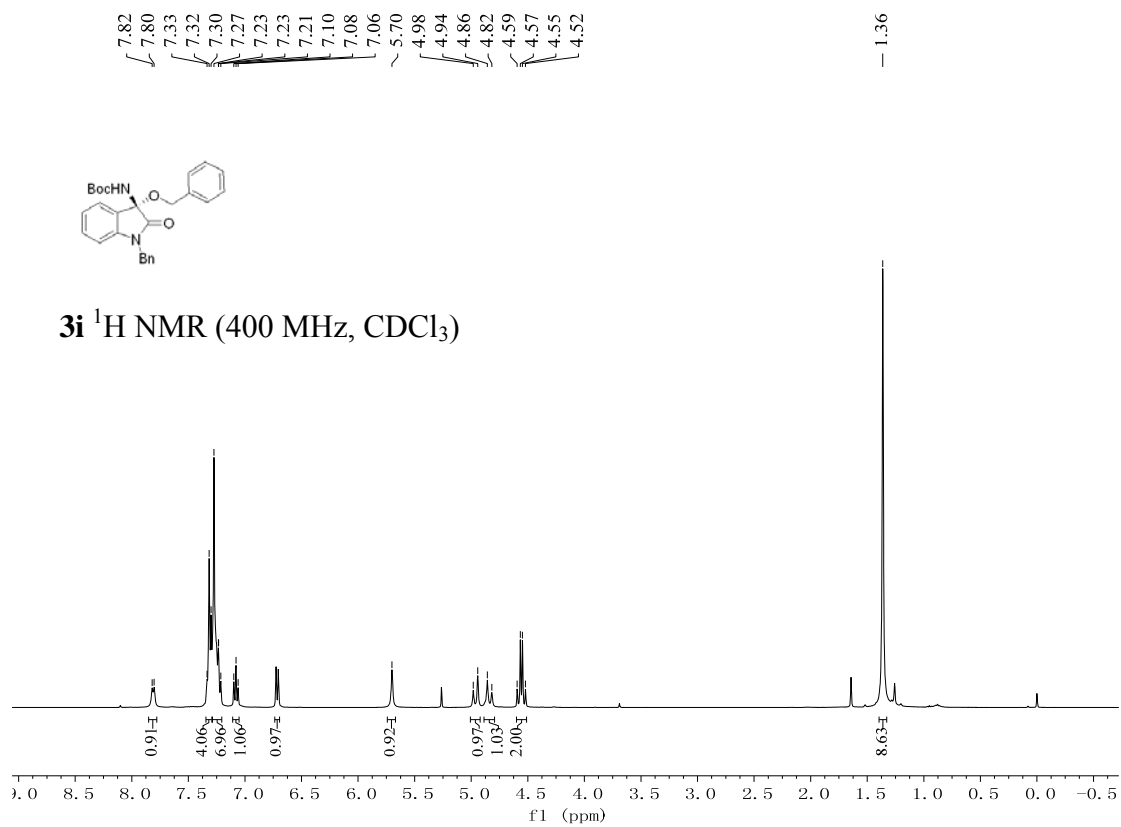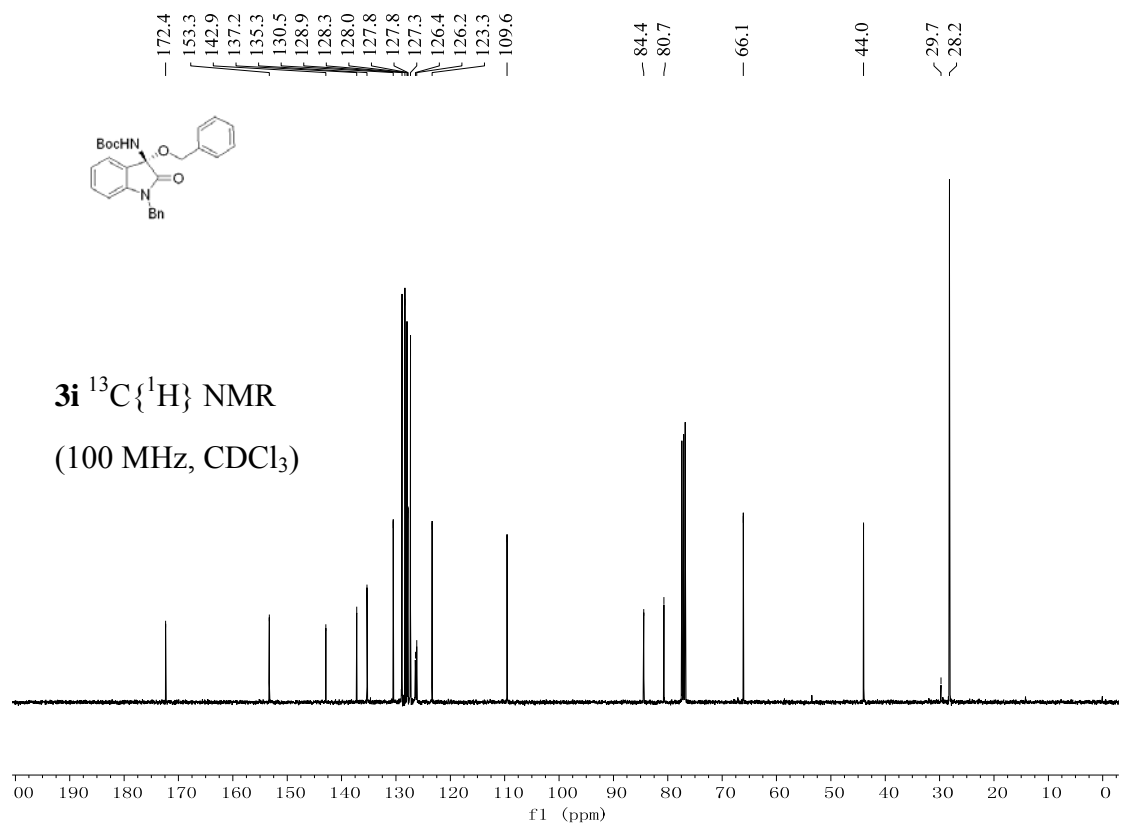

7.68  
7.66  
7.34  
7.32  
7.30  
7.28  
7.26  
7.24  
7.23  
7.21  
7.19  
7.08  
7.06  
7.04  
6.71  
6.69  
— 5.64  
5.05  
5.02  
5.01  
4.99  
4.83  
4.79

3.51  
3.49  
3.48

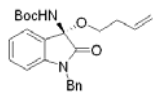

**3j**  $^1\text{H}$  NMR (400 MHz,  $\text{CDCl}_3$ )

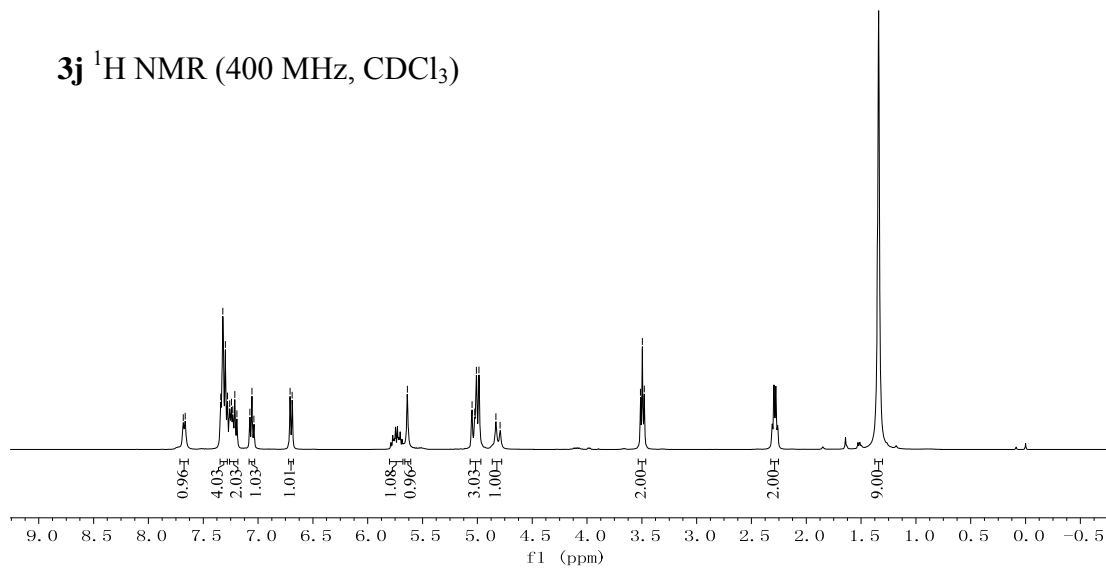

— 172.5  
— 153.3  
— 142.9  
— 135.4  
— 134.6  
— 130.4  
— 128.8  
— 127.7  
— 127.3  
— 126.2  
— 125.9  
— 123.2  
— 116.8  
— 109.5

— 84.4  
— 80.6

— 63.4

— 43.9

— 34.0  
— 28.2

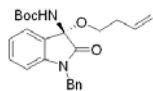

**3j**  $^{13}\text{C}\{^1\text{H}\}$  NMR  
(100 MHz,  $\text{CDCl}_3$ )

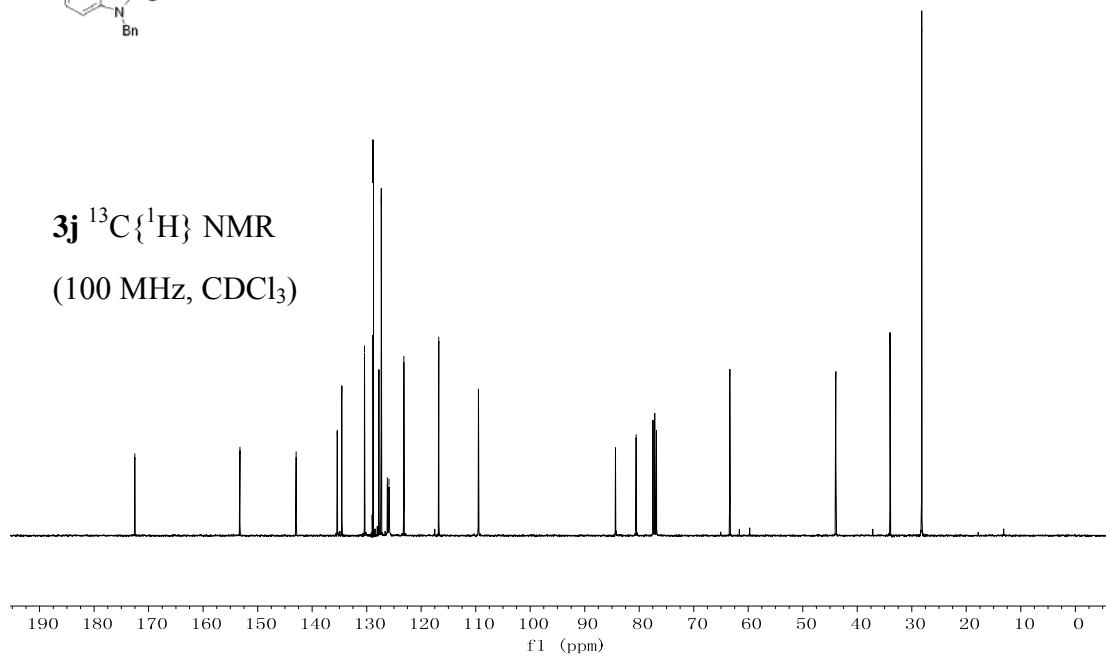

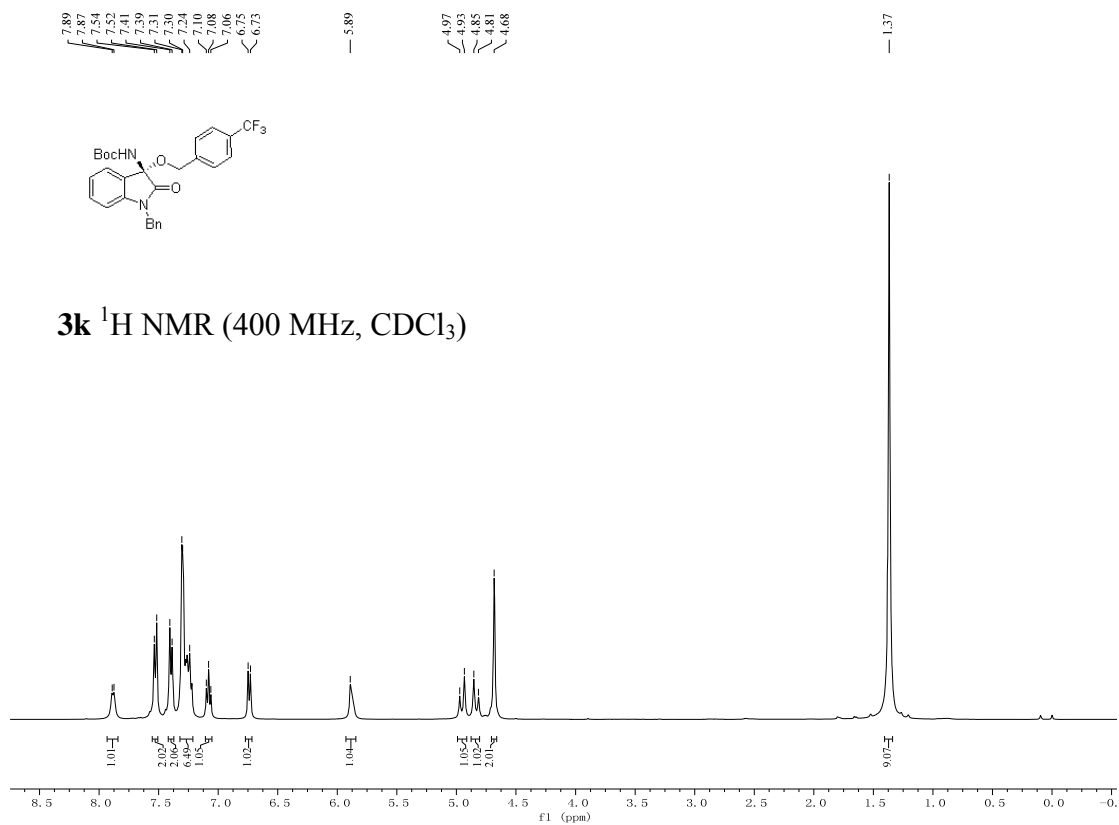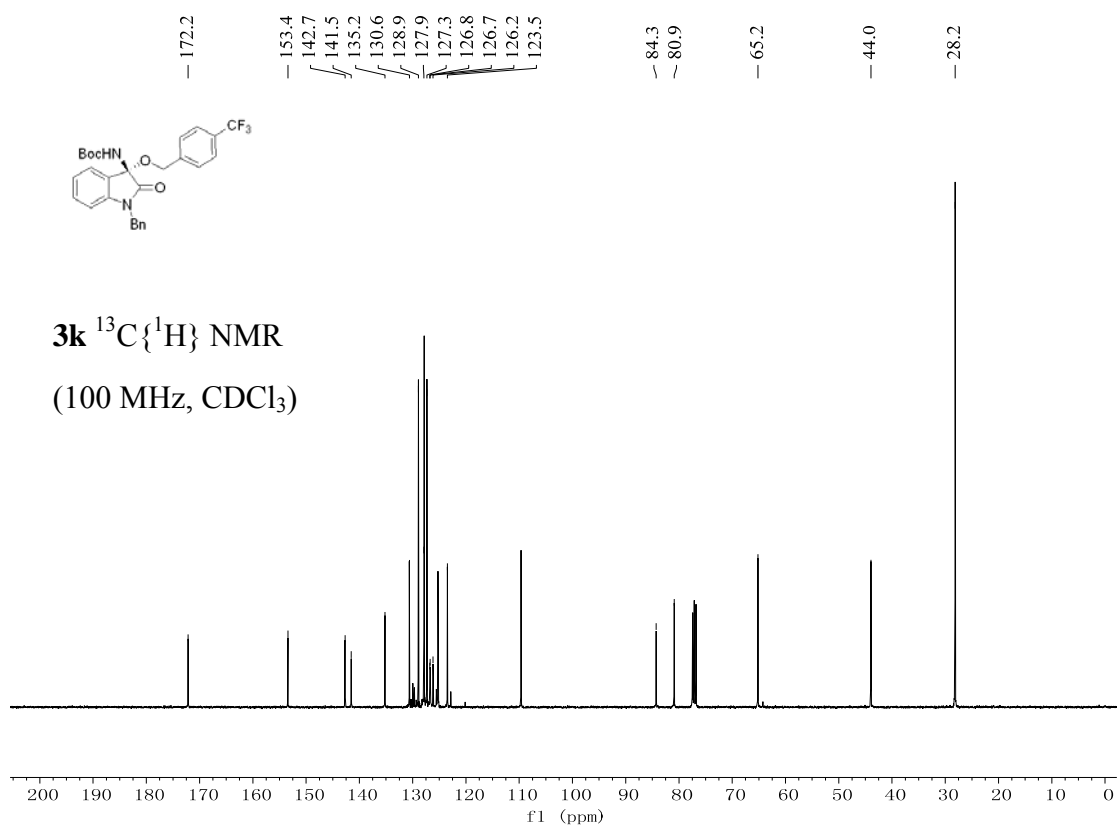

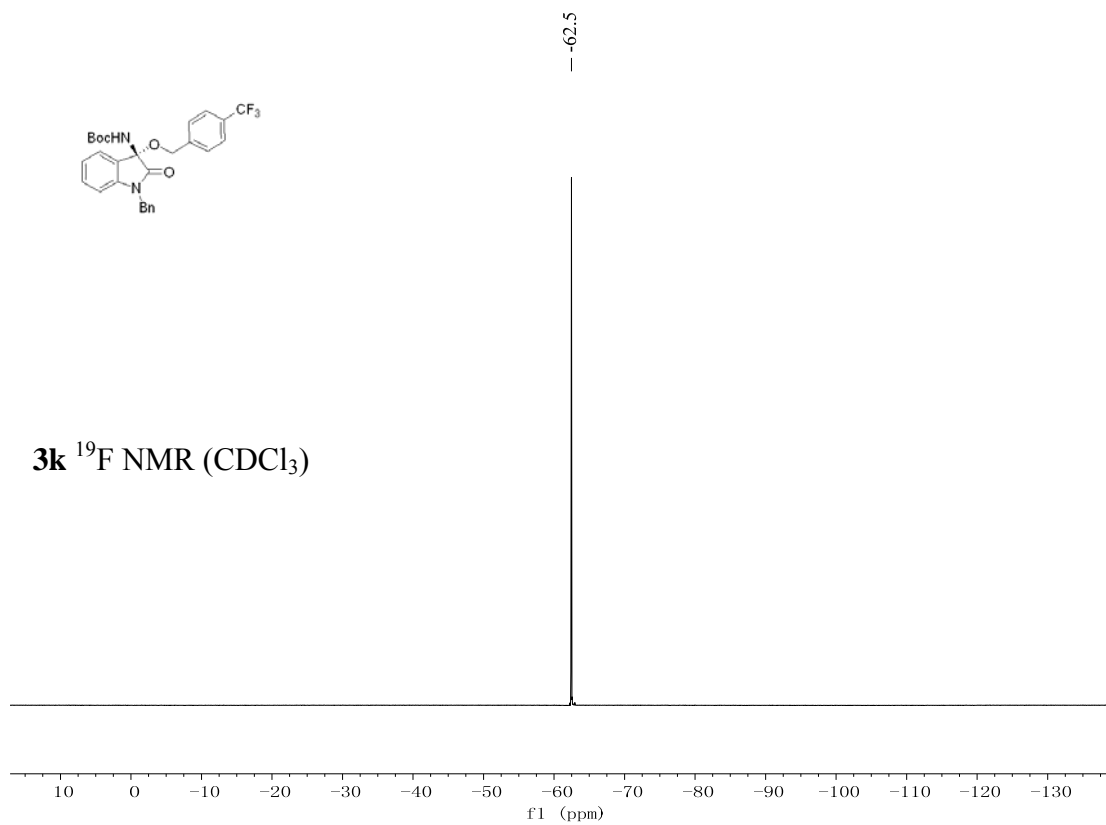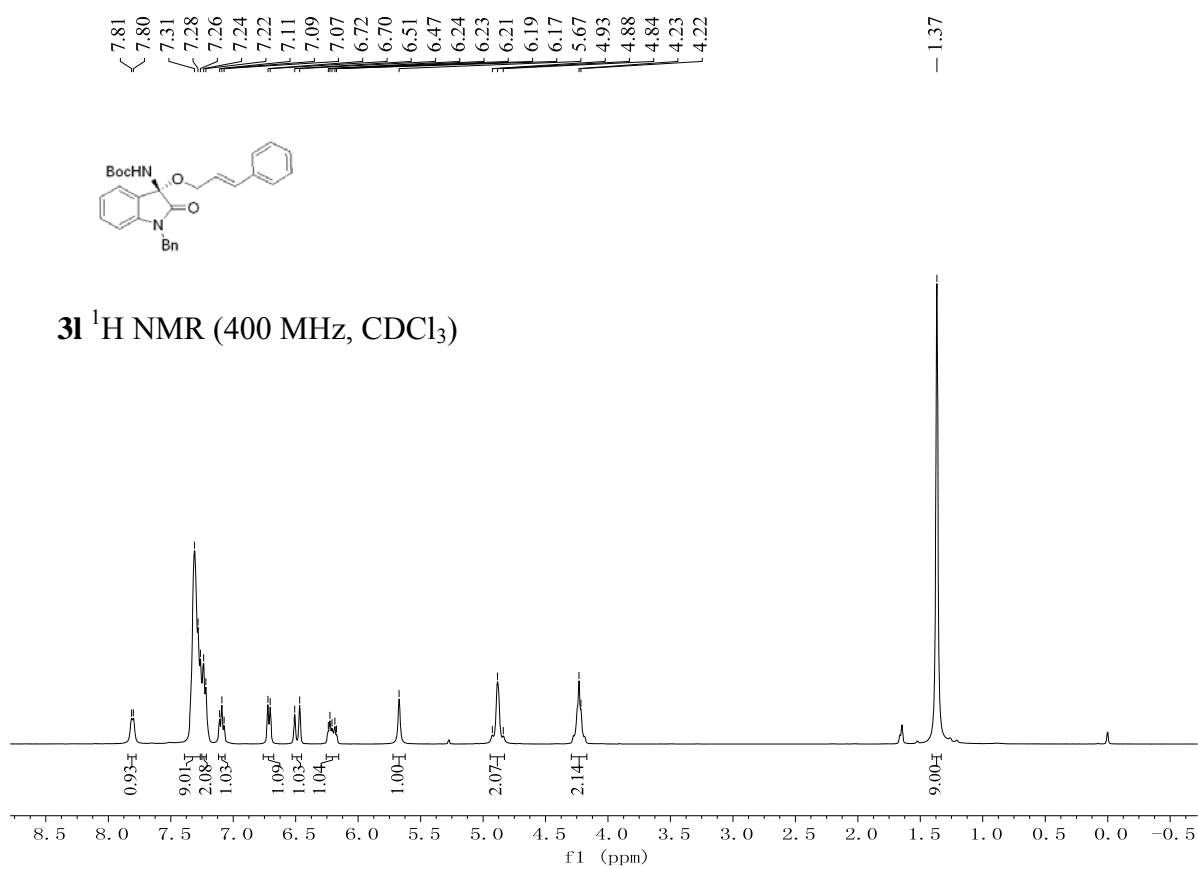

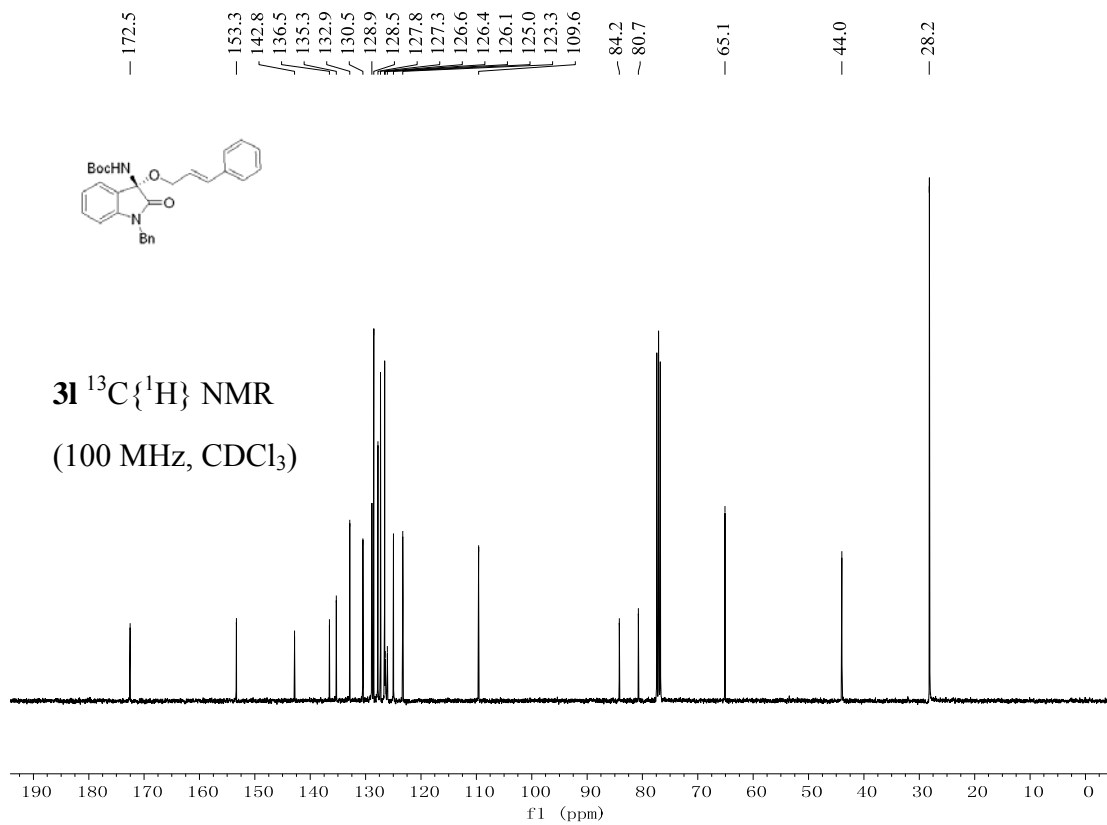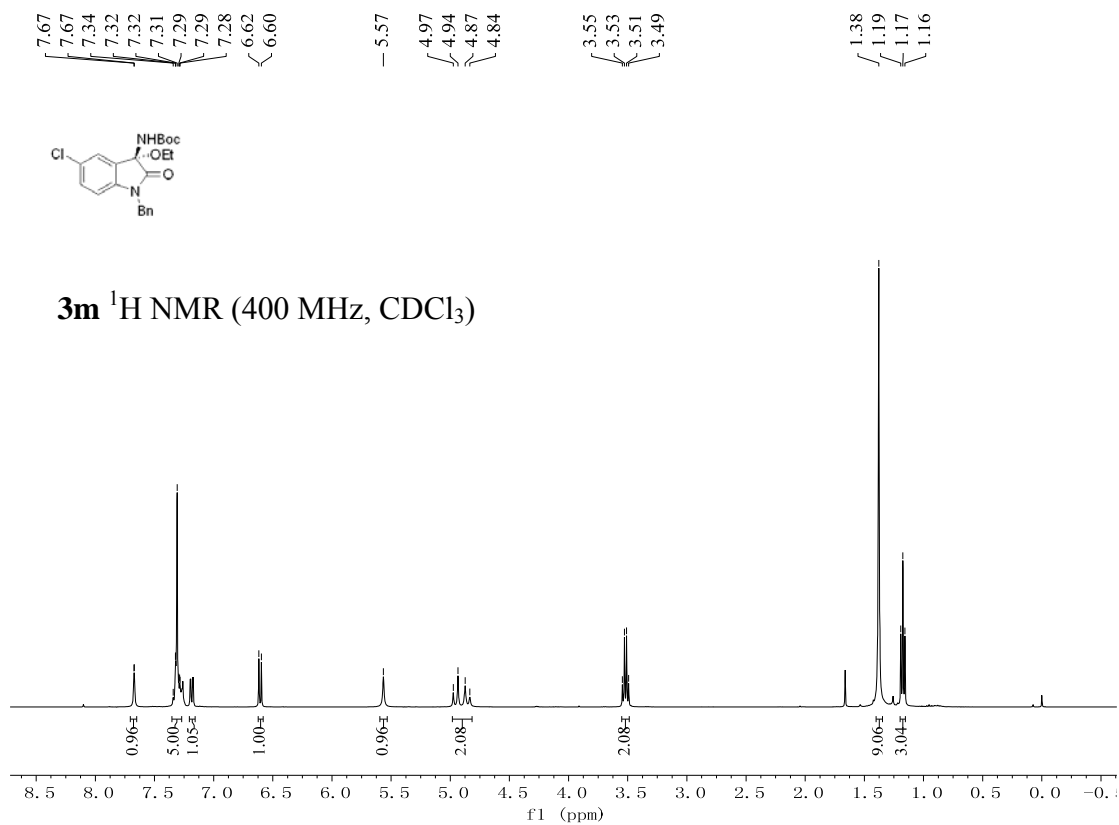



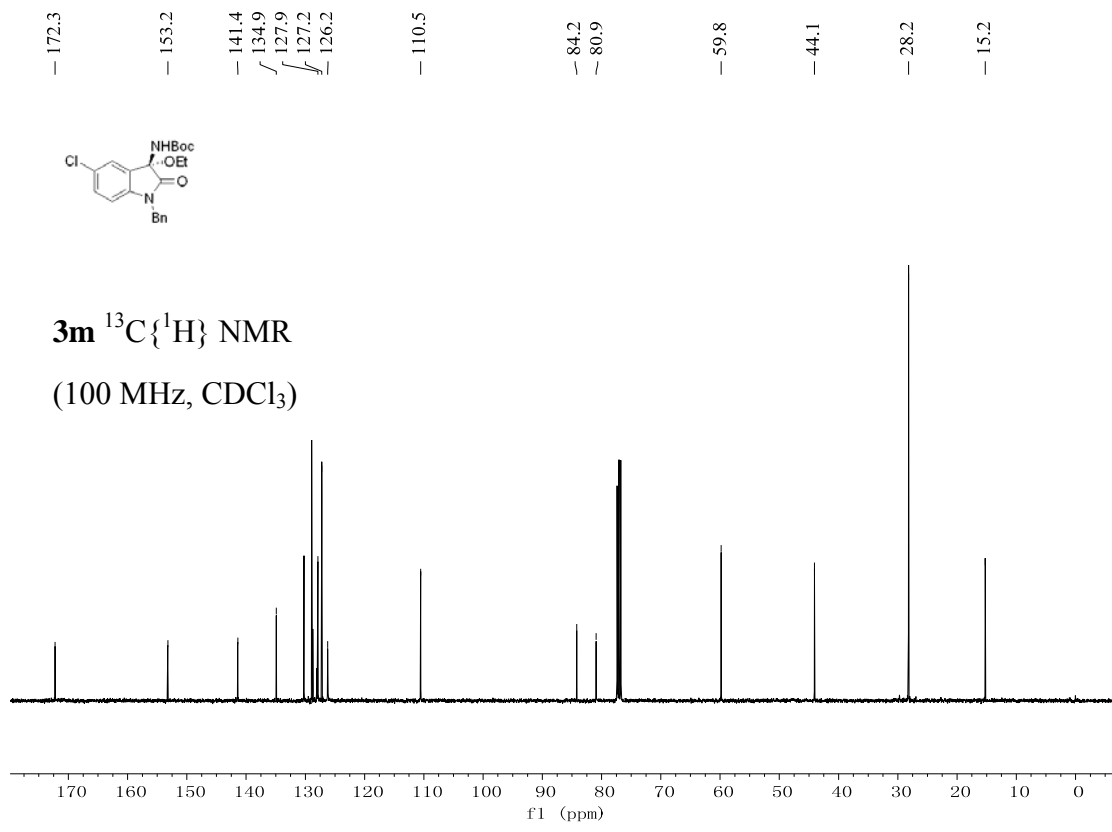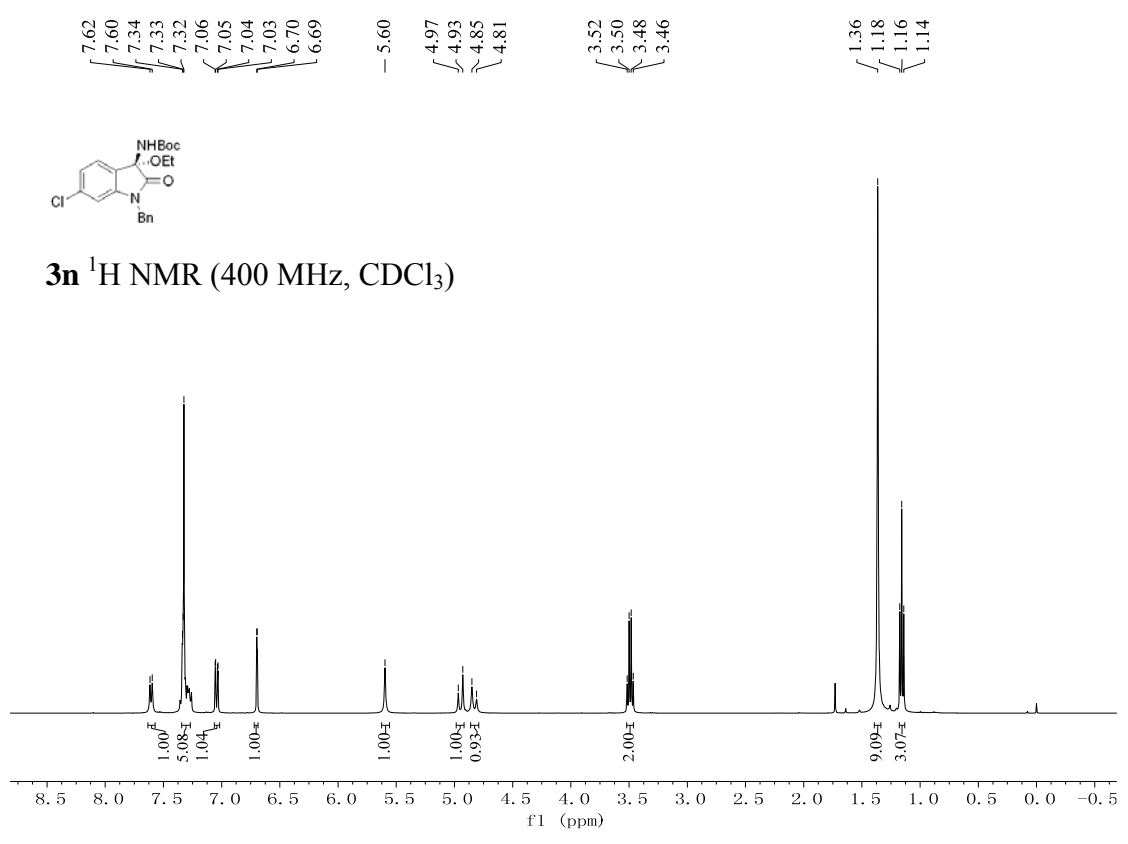

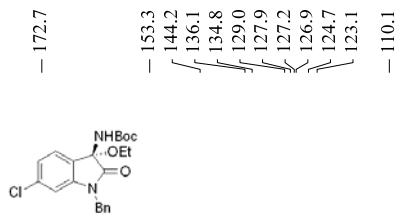

**3n**  $^{13}\text{C}\{^1\text{H}\}$  NMR

(100 MHz,  $\text{CDCl}_3$ )

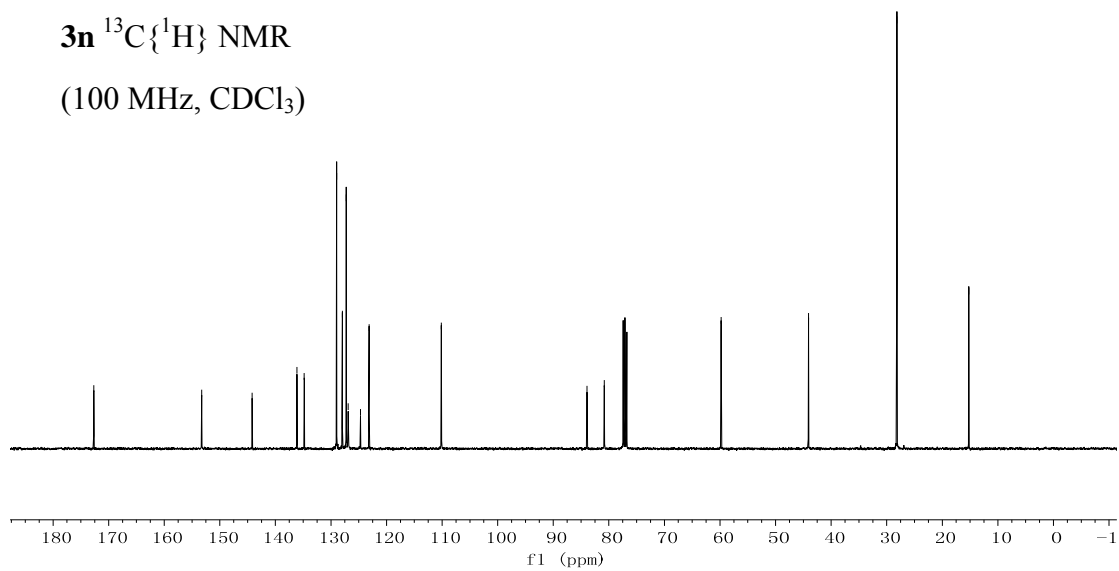

$\delta$  7.56  
 $\delta$  7.54  
 $\delta$  7.31  
 $\delta$  7.30  
 $\delta$  7.28  
 $\delta$  7.25  
 $\delta$  7.24  
 $\delta$  7.23  
 $\delta$  7.22  
 $\delta$  7.20  
 $\delta$  7.20  
 $\delta$  7.04  
 $\delta$  7.02  
 $\delta$  7.00  
 $\delta$  5.54  
 $\delta$  5.40  
 $\delta$  5.38  
 $\delta$  5.36  
 $\delta$  5.35  
 $\delta$  3.52  
 $\delta$  3.50  
 $\delta$  3.48  
 $\delta$  3.46  
 $\delta$  1.35  
 $\delta$  1.16  
 $\delta$  1.15  
 $\delta$  1.13

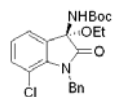

**3o**  $^1\text{H}$  NMR (400 MHz,  $\text{CDCl}_3$ )

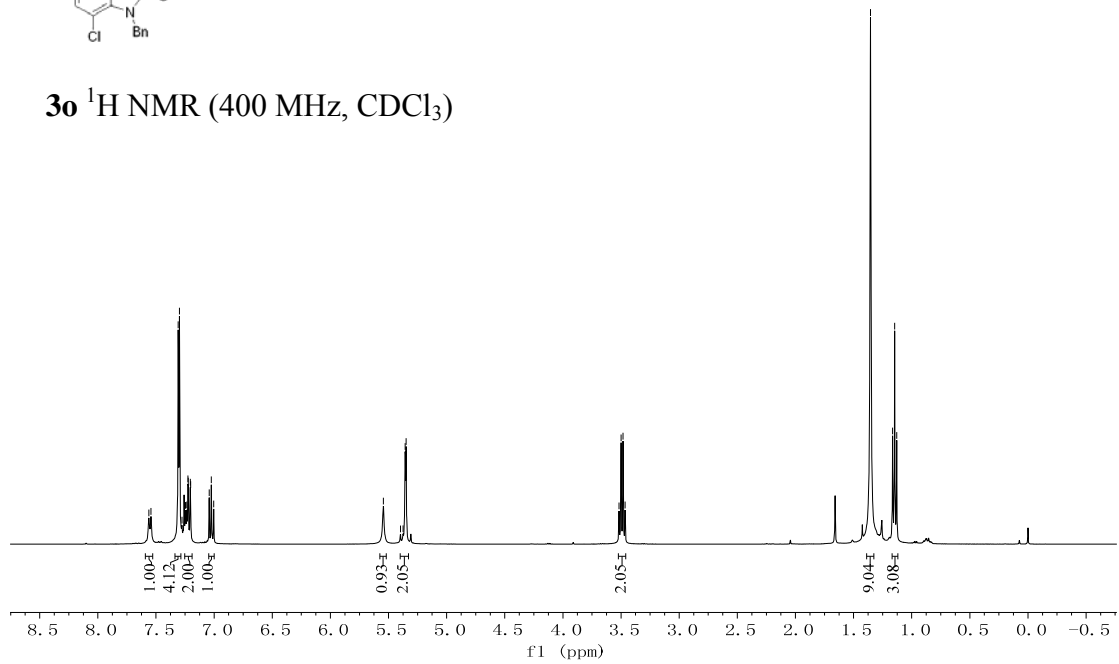

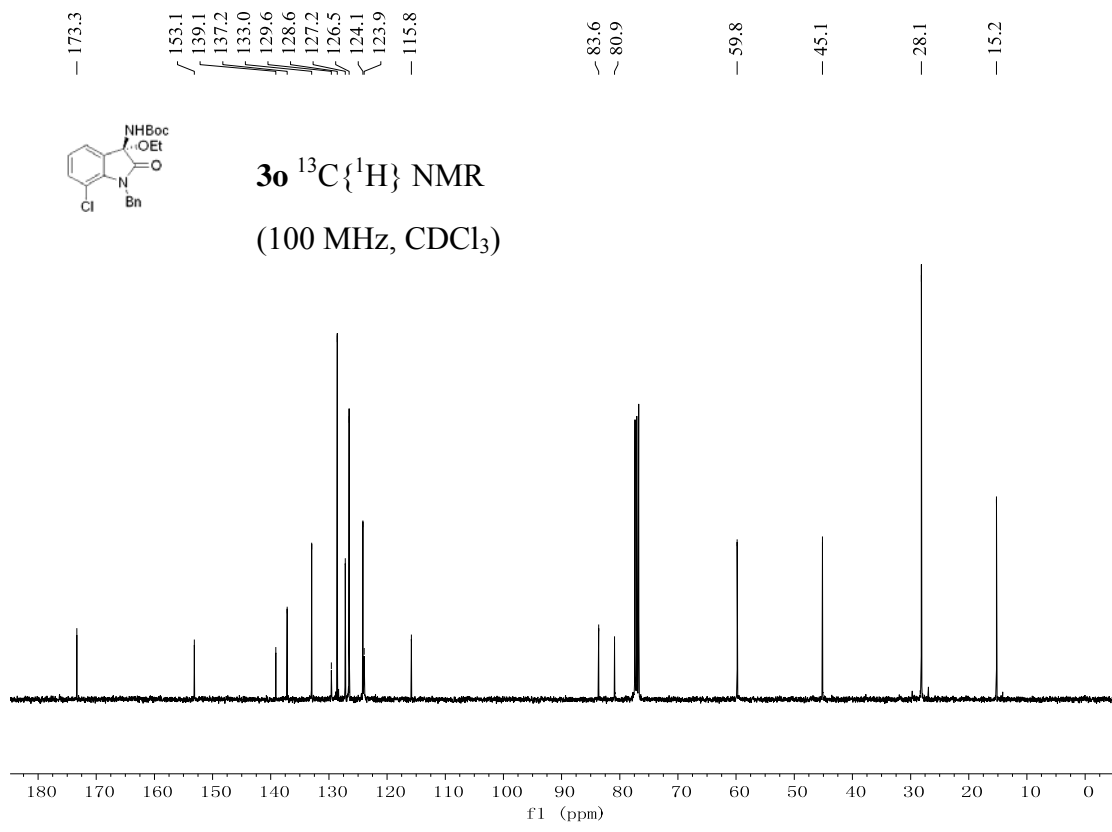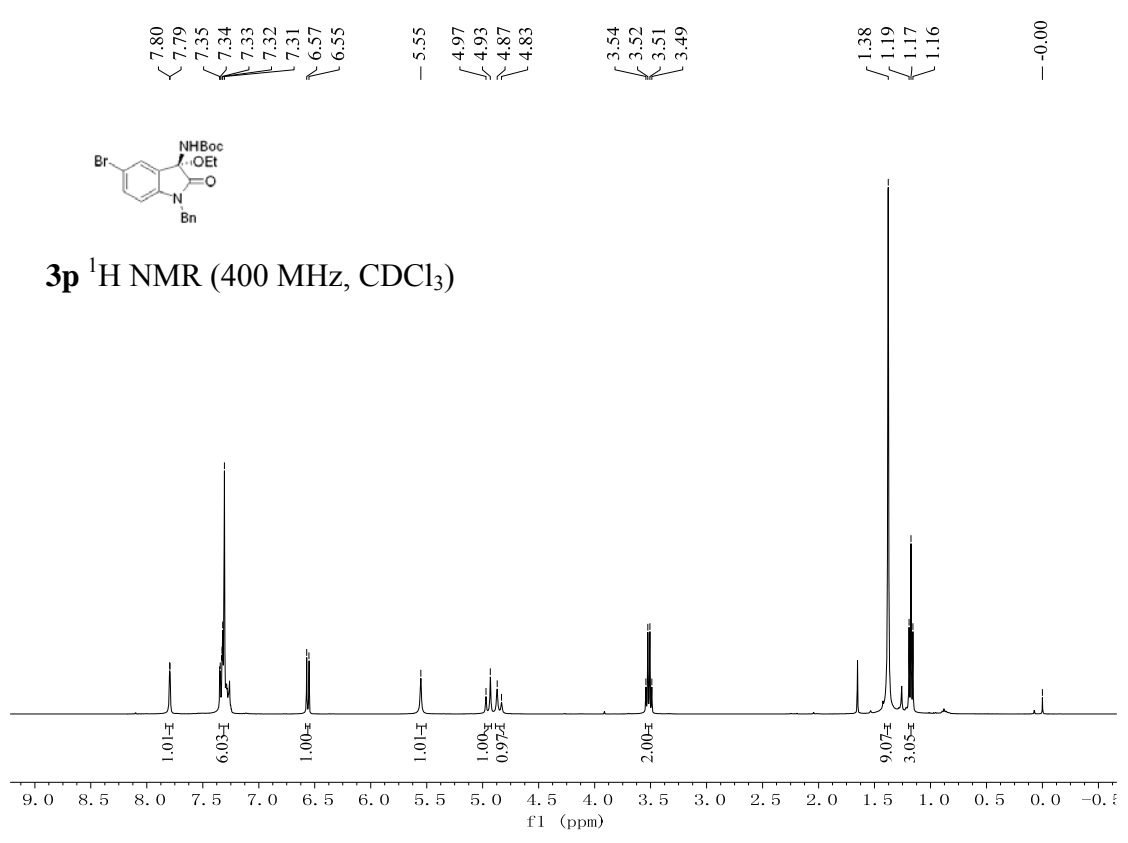

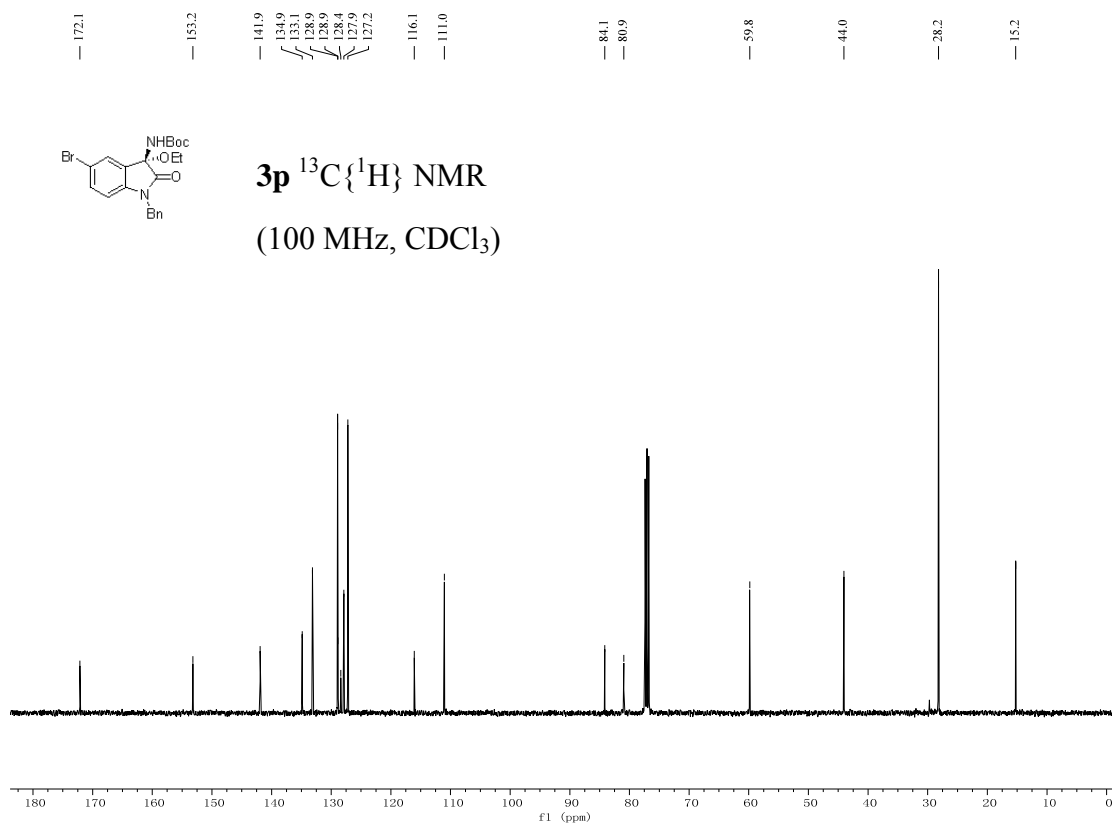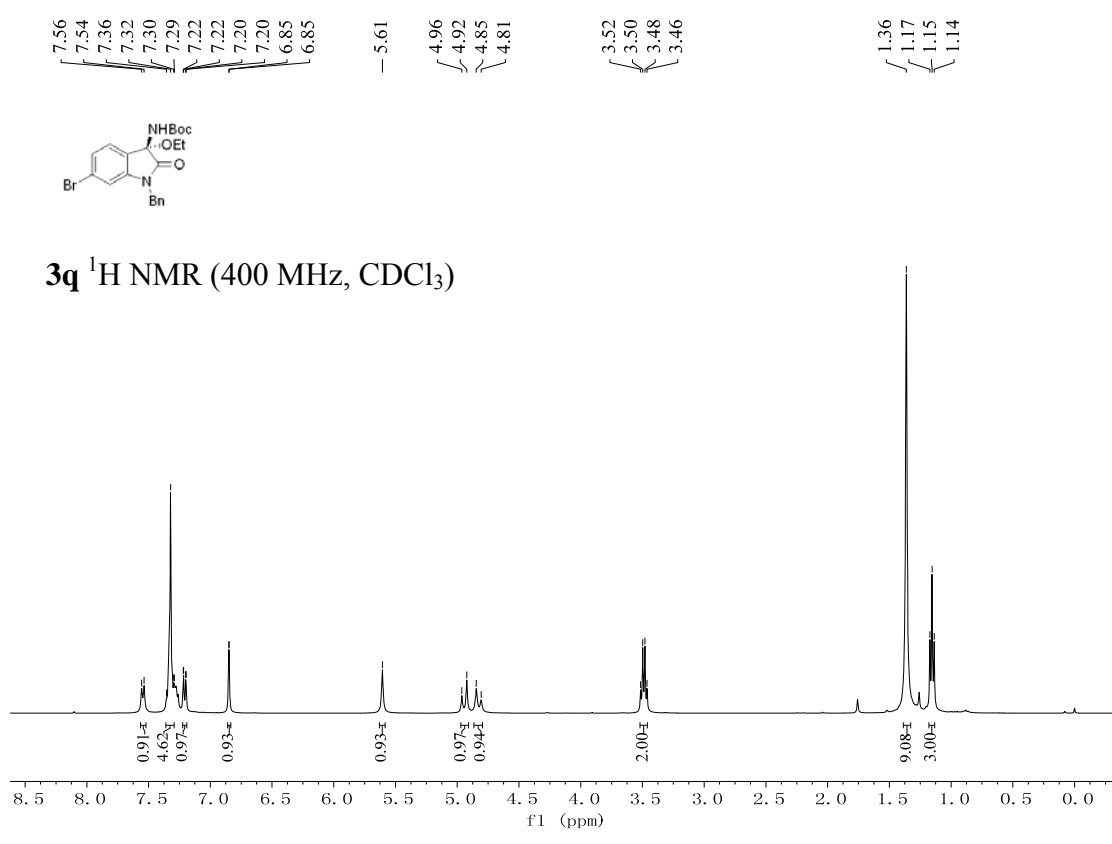

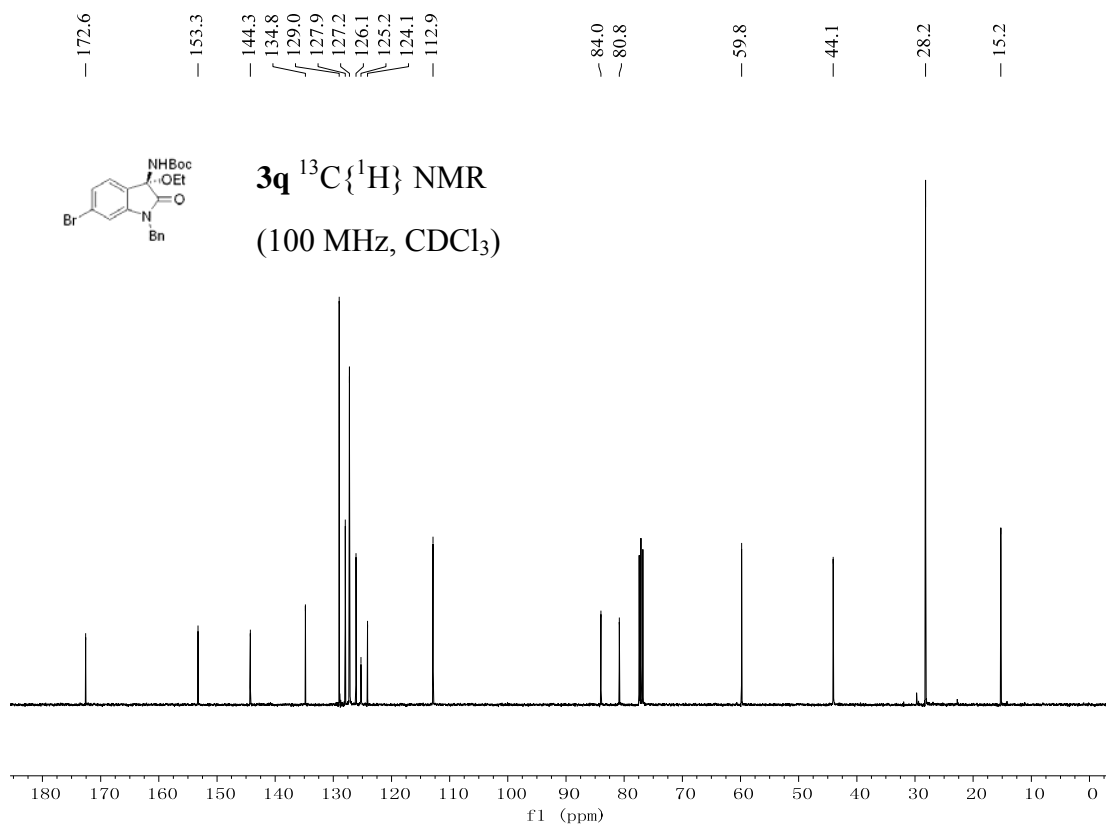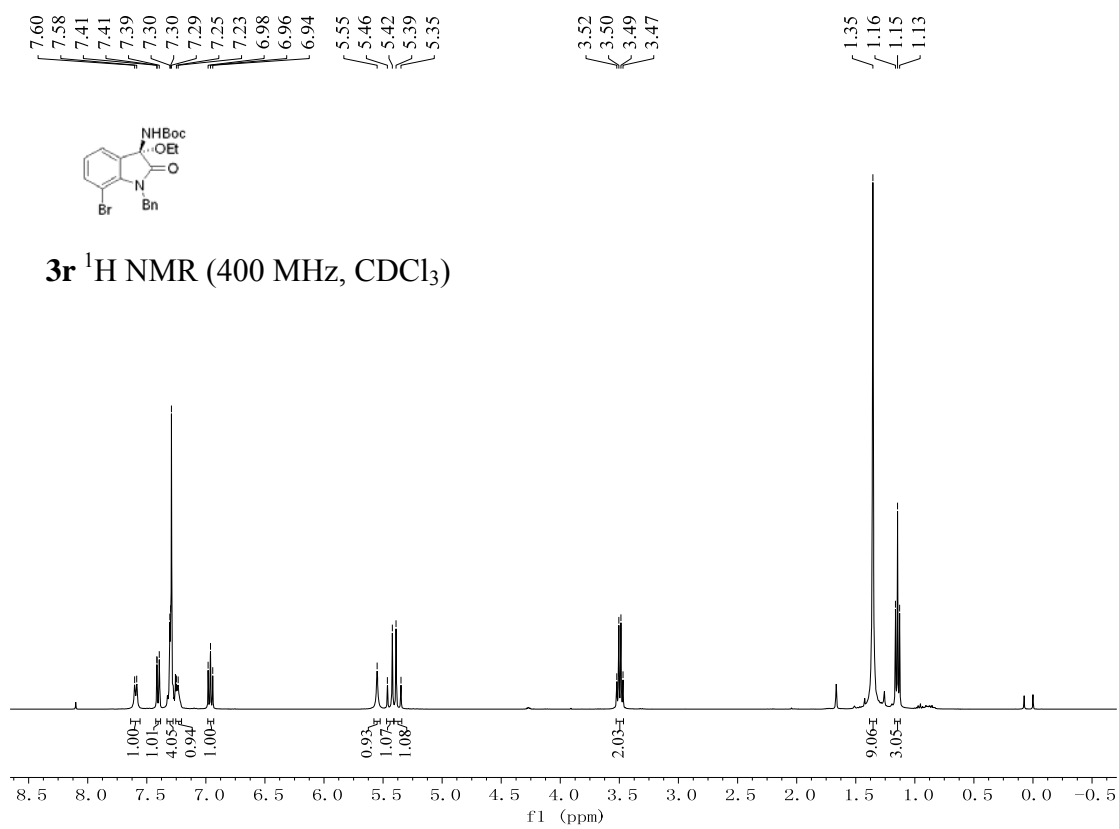

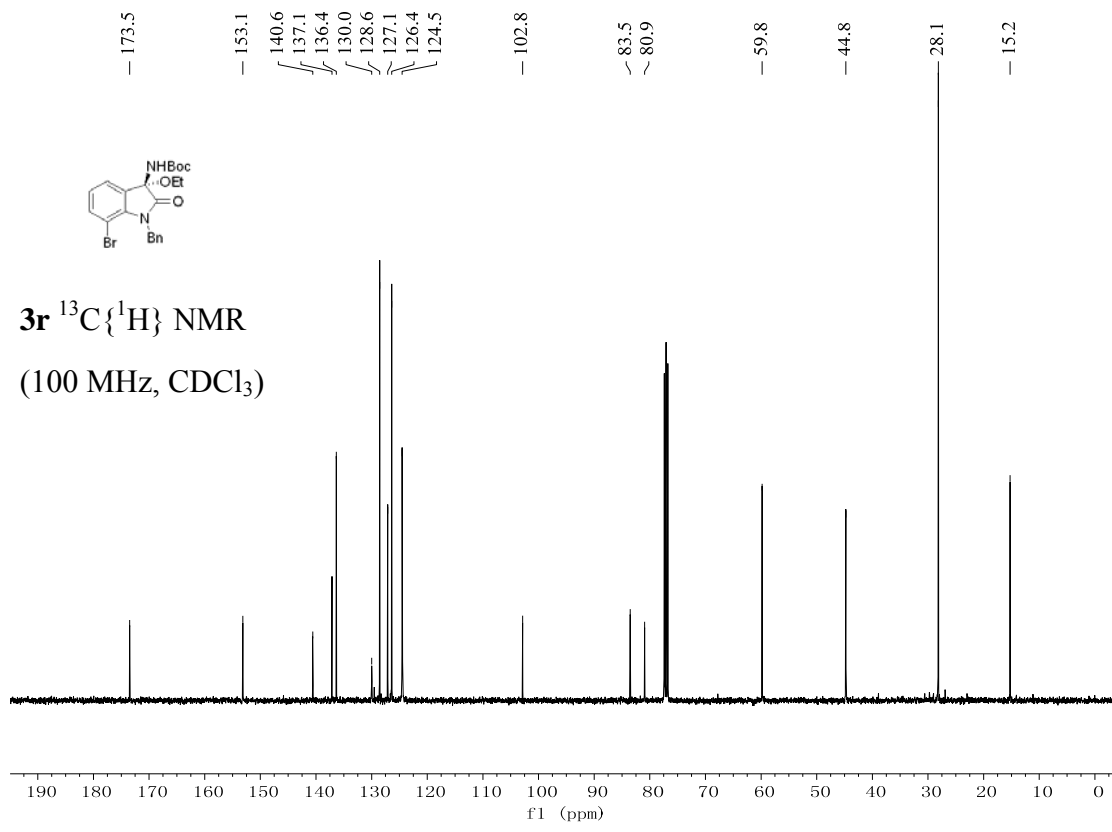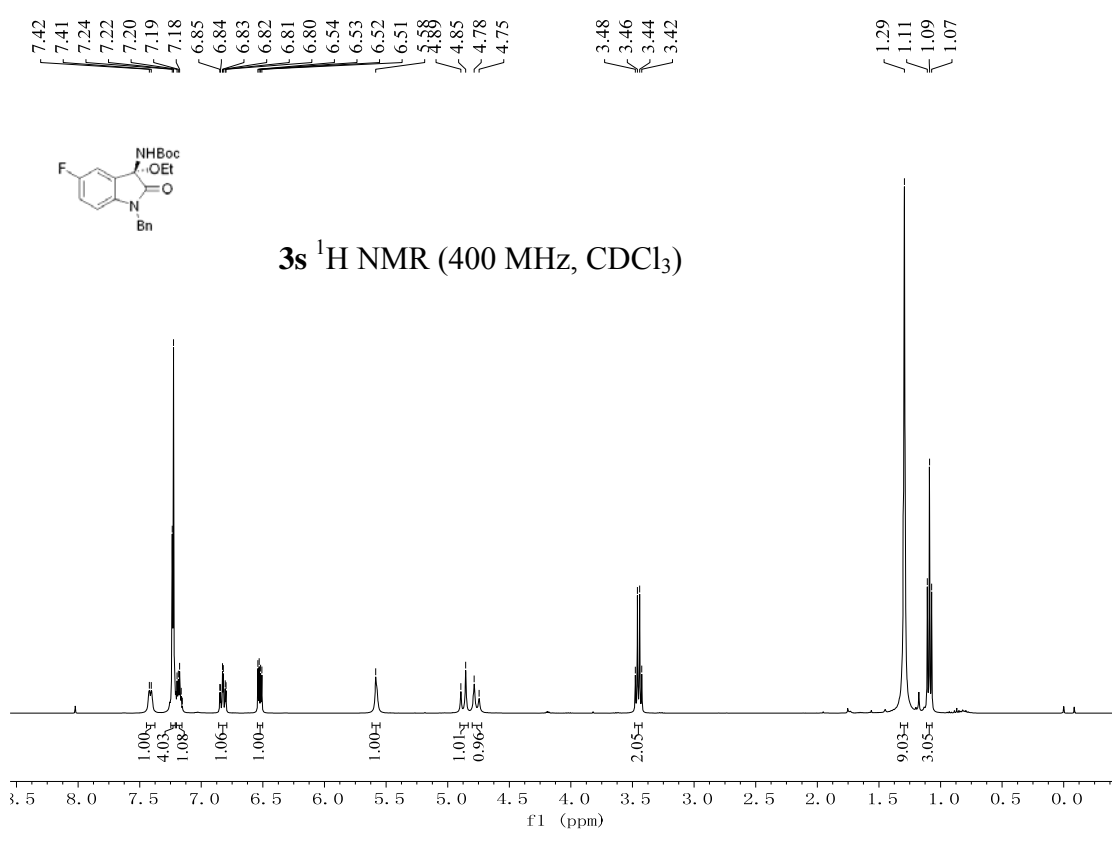

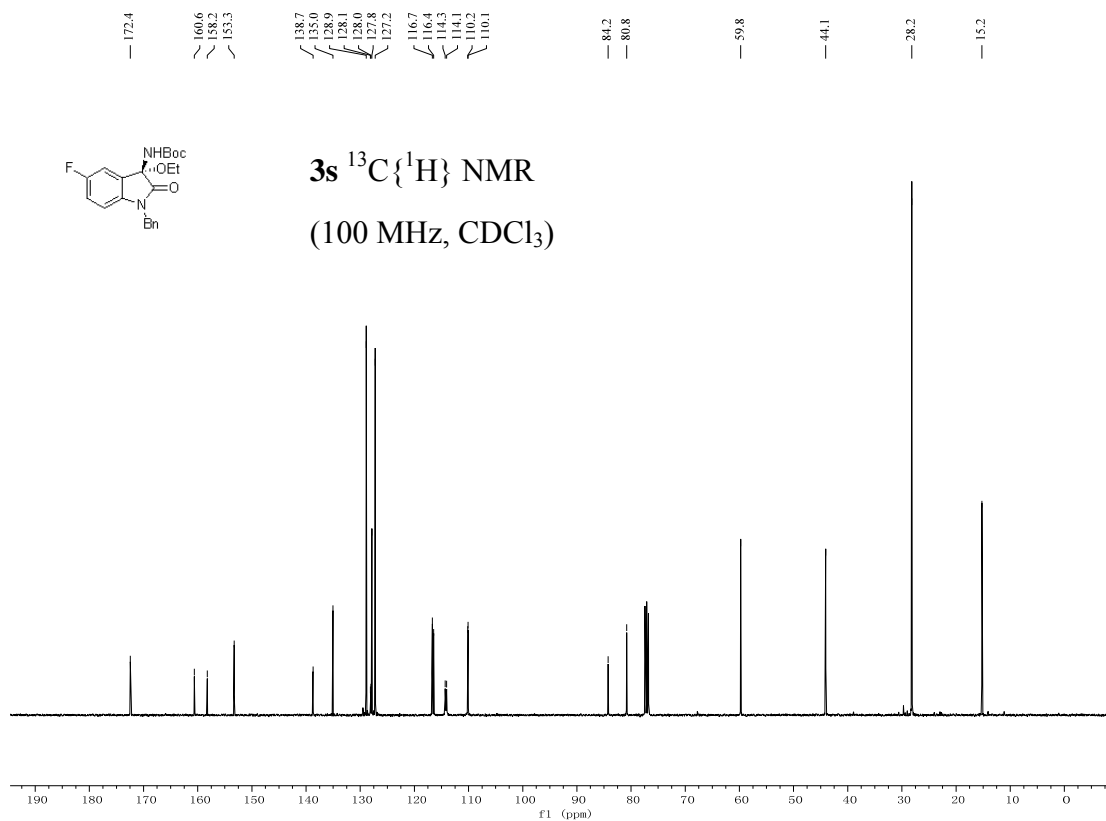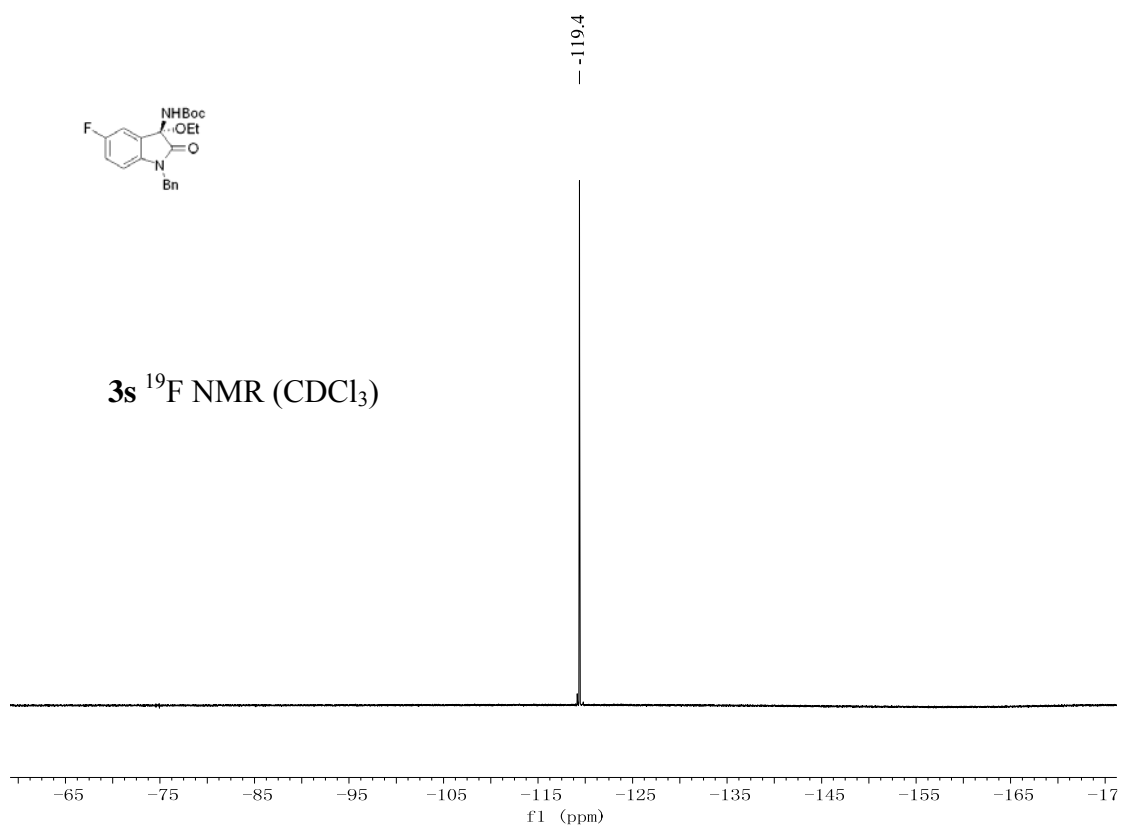

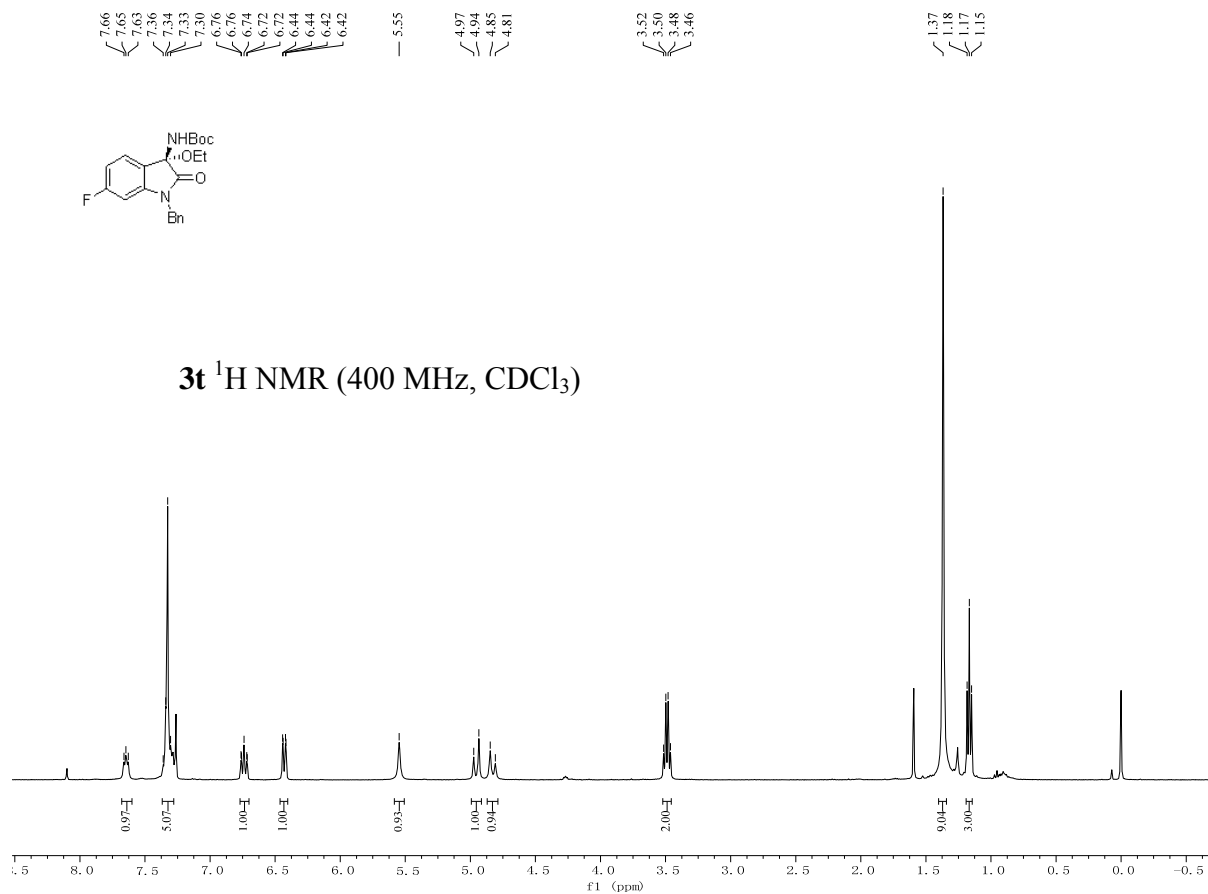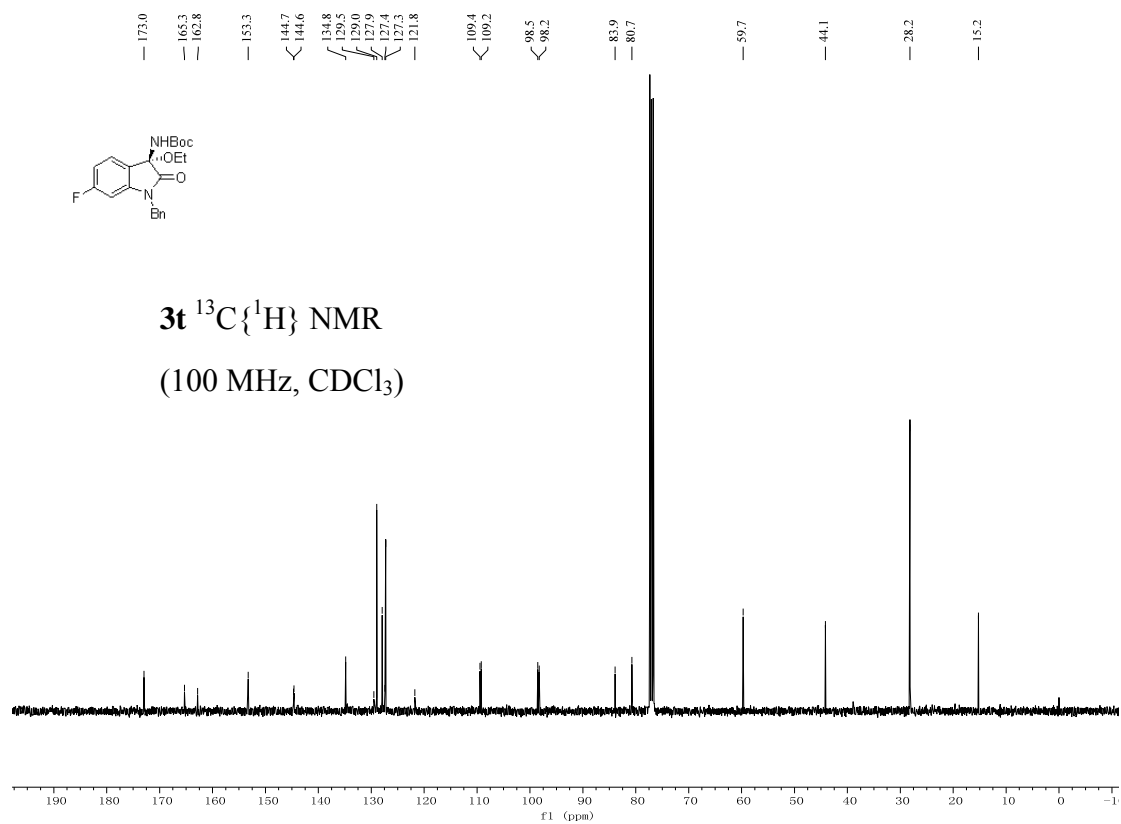



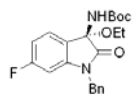

**3t**  $^{19}\text{F}$  NMR ( $\text{CDCl}_3$ )

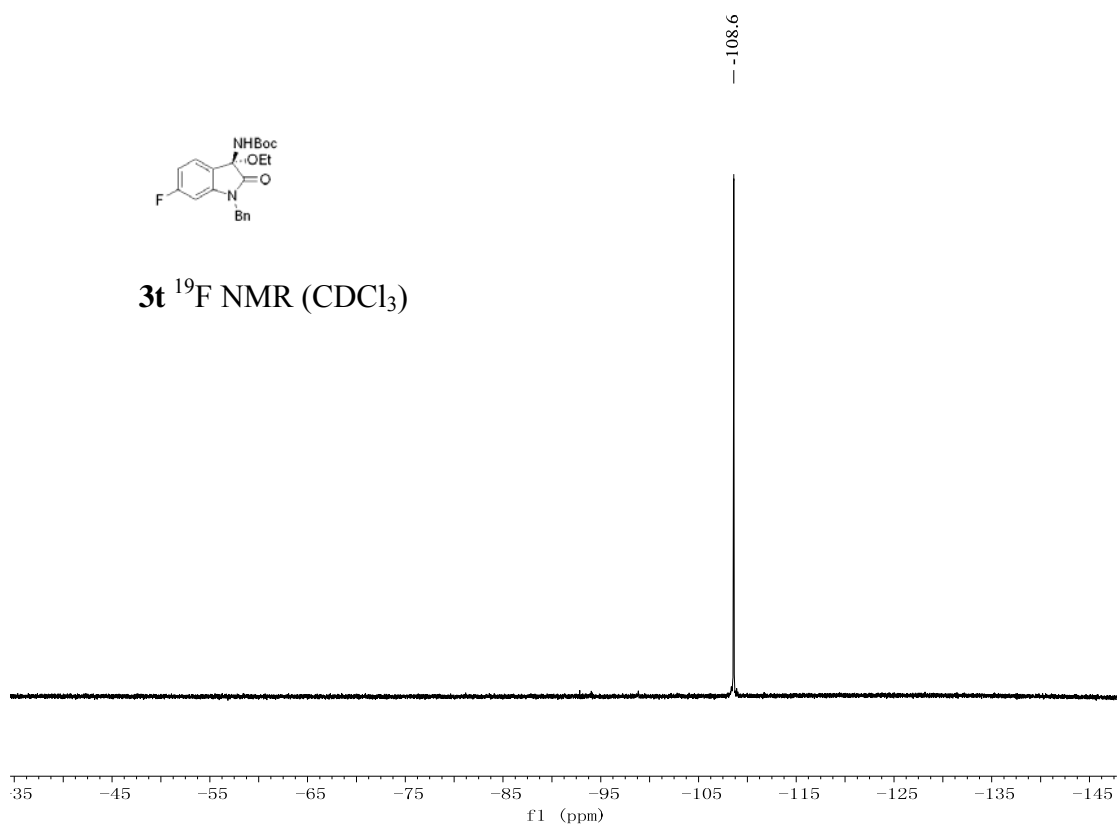

7.44  
7.36  
7.32  
7.32  
7.31  
7.26  
7.27  
7.03  
7.02  
7.01

5.52  
5.13  
5.06  
5.02  
4.98

3.47  
3.46  
3.44  
3.42

1.34  
1.15  
1.14  
1.12

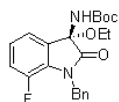

**3u**  $^1\text{H}$  NMR (400 MHz,  $\text{CDCl}_3$ )

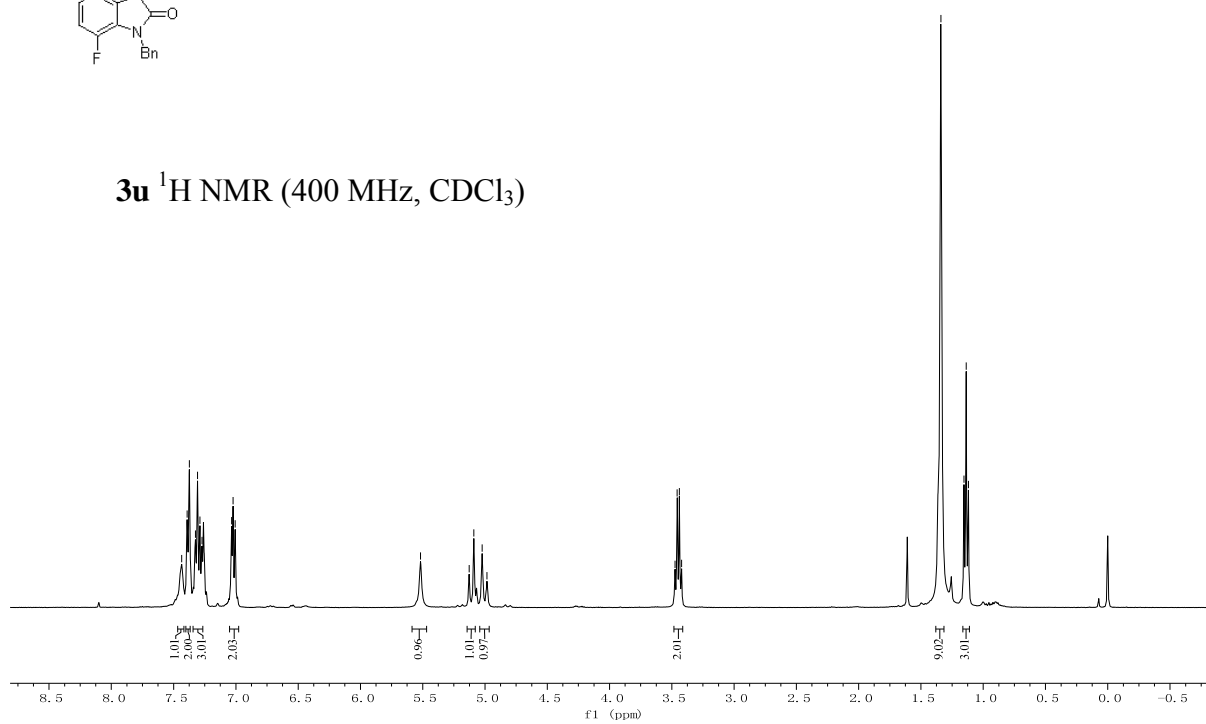

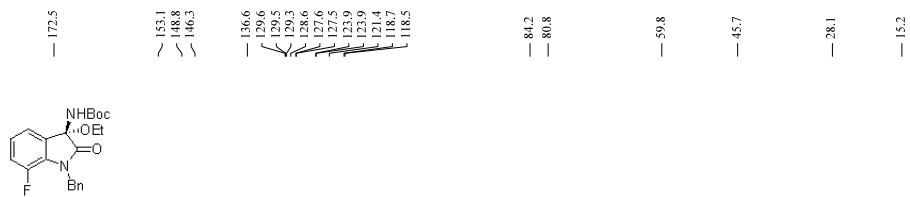

**3u**  $^{13}\text{C}\{^1\text{H}\}$  NMR  
(100 MHz,  $\text{CDCl}_3$ )

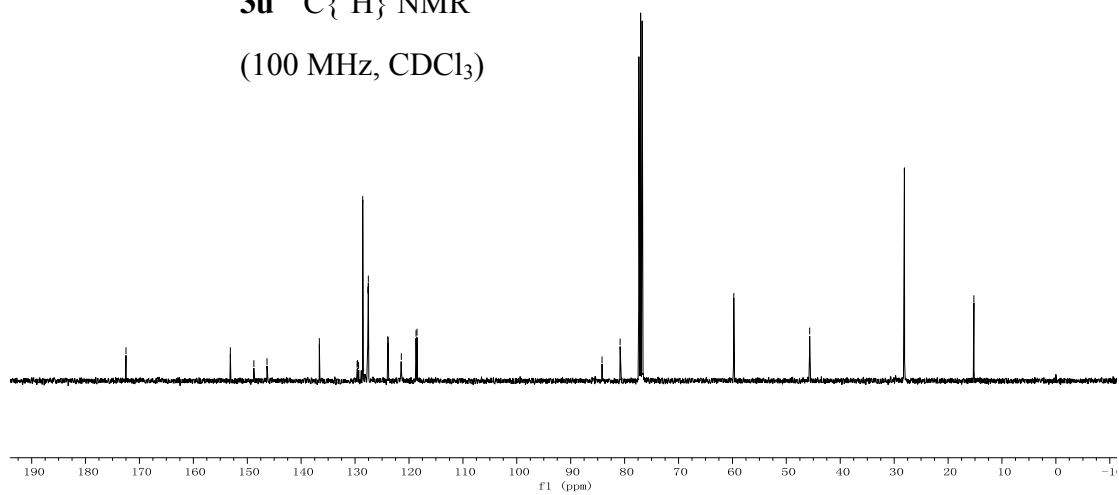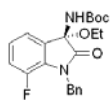

**3u**  $^{19}\text{F}$  NMR ( $\text{CDCl}_3$ )

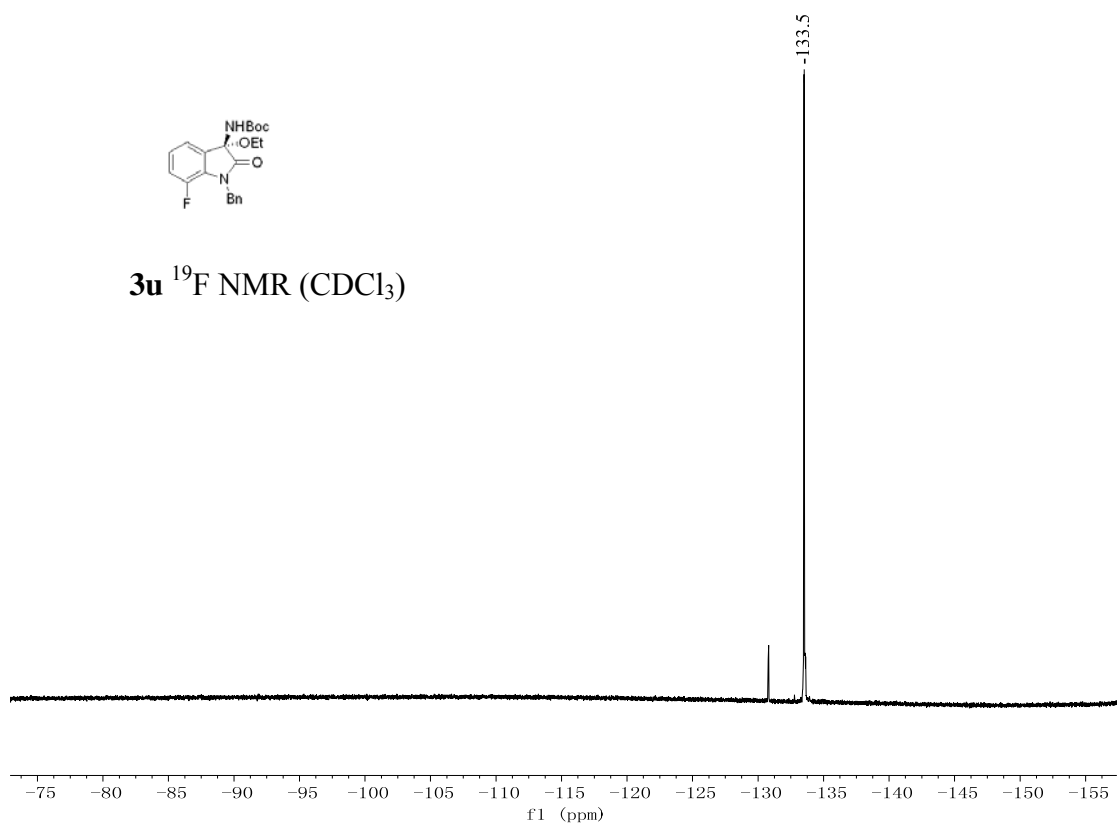

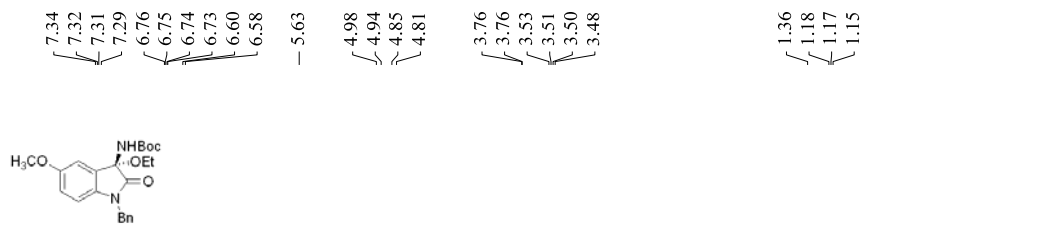

**3v**  $^1\text{H}$  NMR (400 MHz,  $\text{CDCl}_3$ )

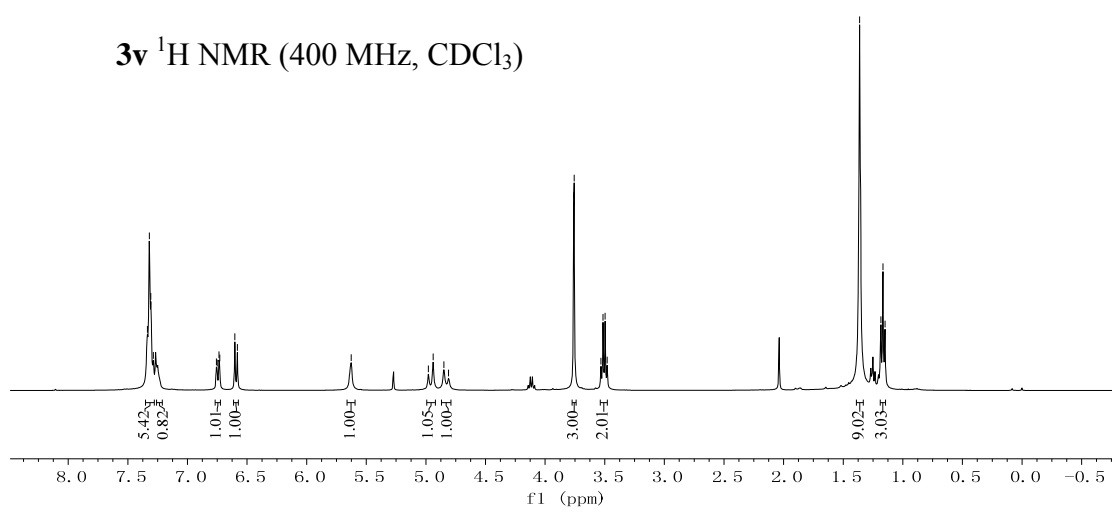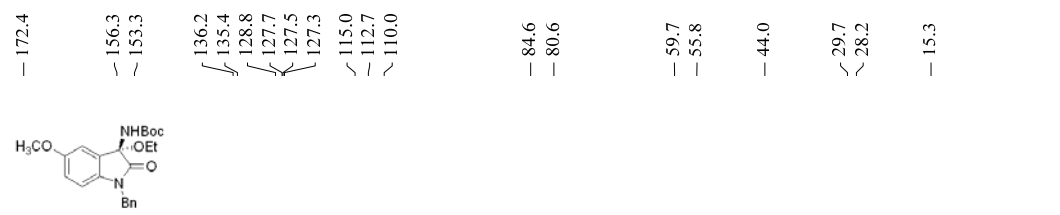

**3v**  $^{13}\text{C}\{^1\text{H}\}$  NMR (100 MHz,  $\text{CDCl}_3$ )

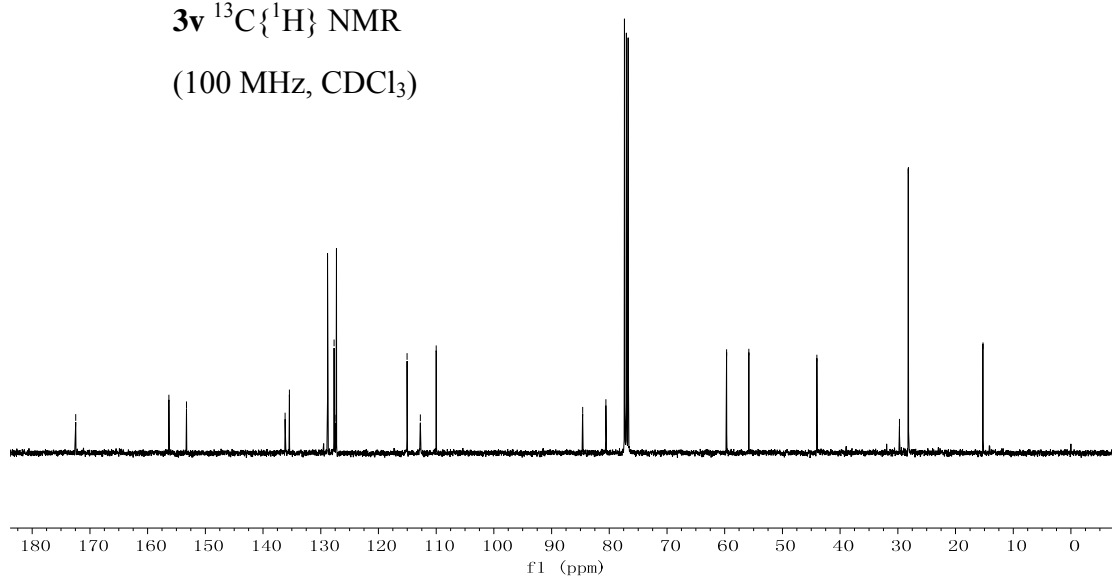

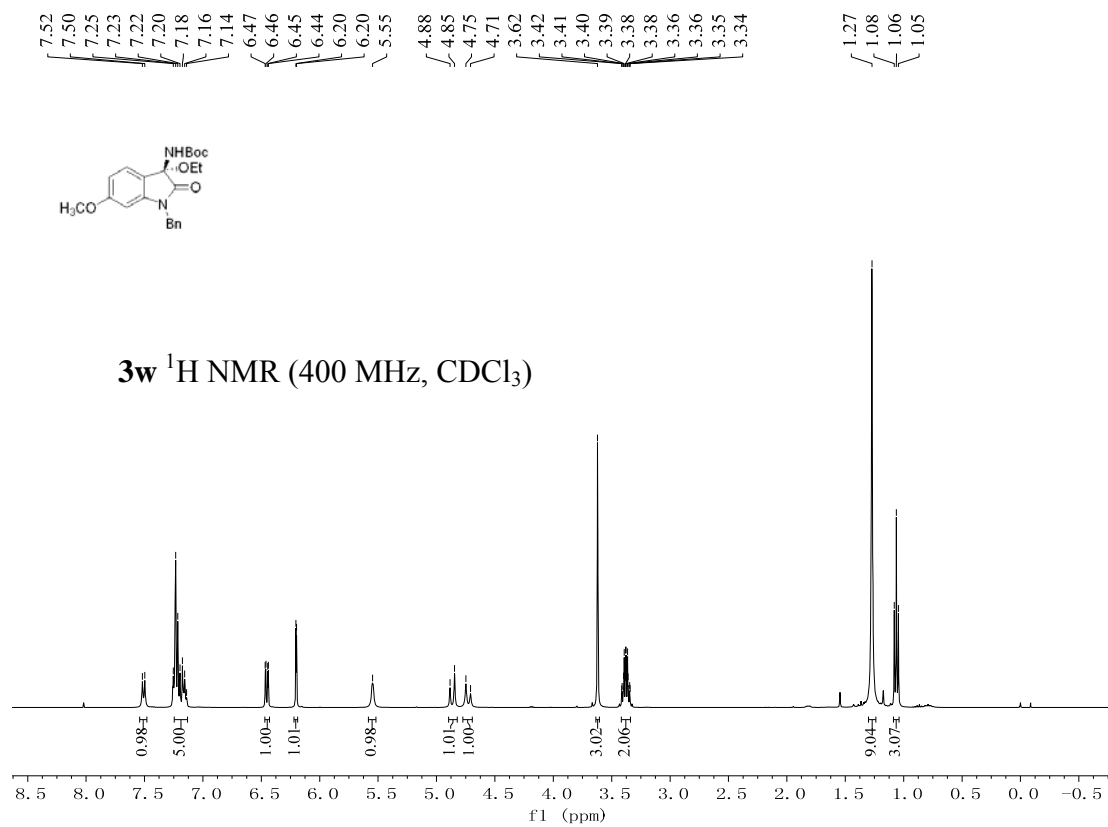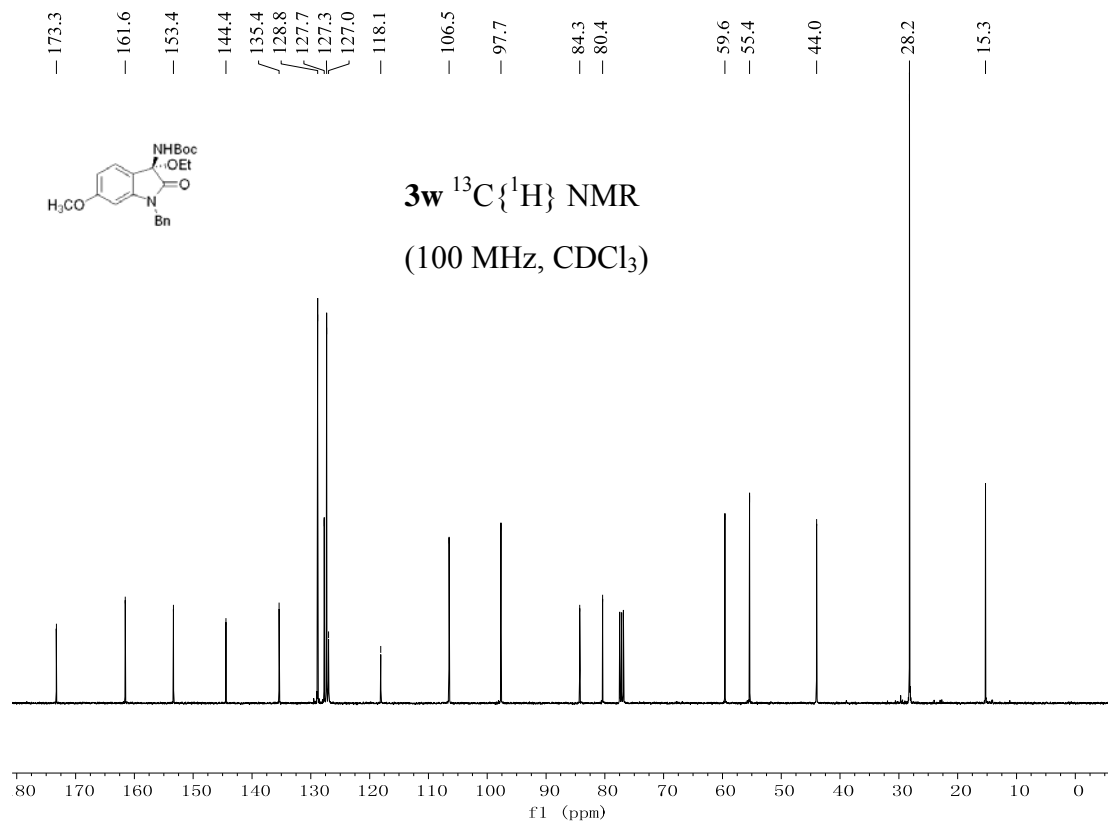

7.35  
7.33  
7.29  
7.27  
7.25  
7.22  
7.20  
7.18  
7.05  
7.03  
7.01  
6.87  
6.85

— 5.58 —  
— 5.18 —

3.64  
3.45  
3.44  
3.42  
3.40

1.33  
1.13  
1.12  
1.10

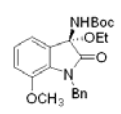

**3x** <sup>1</sup>H NMR (400 MHz, CDCl<sub>3</sub>)

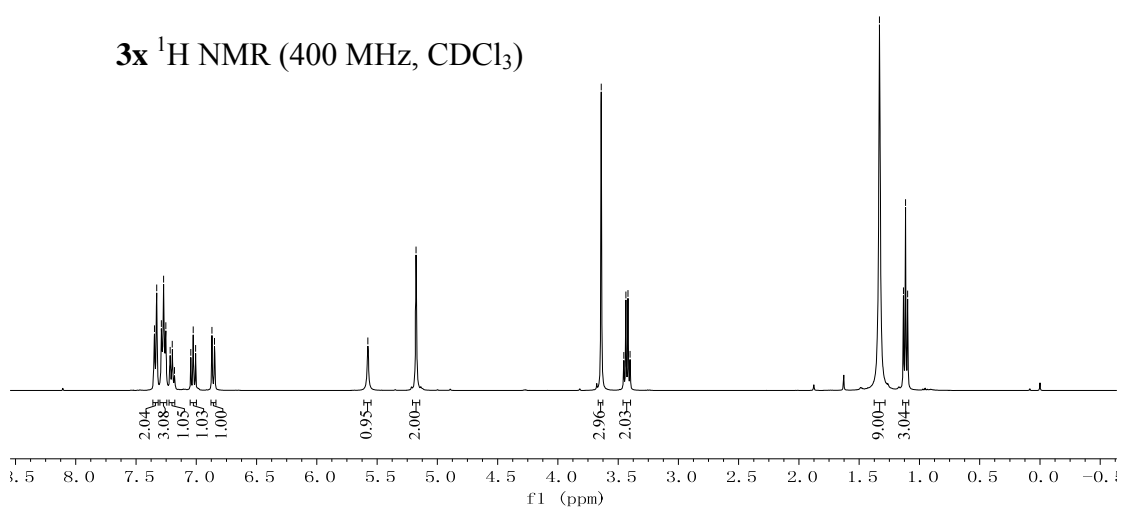

173.1  
153.2  
145.2  
138.1  
131.0  
128.3  
128.0  
127.3  
127.0  
123.9  
118.1  
114.6

84.3  
80.5

59.6  
55.8

46.0

28.1

15.2

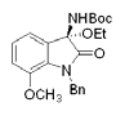

**3x** <sup>13</sup>C {<sup>1</sup>H} NMR  
(100 MHz, CDCl<sub>3</sub>)

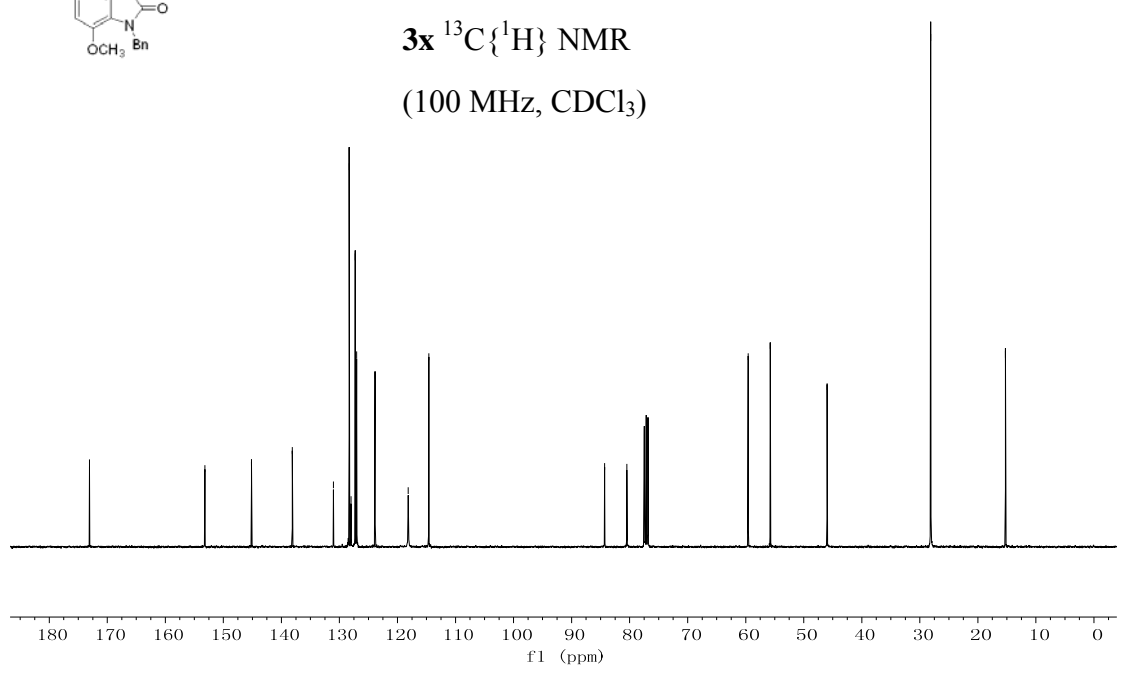

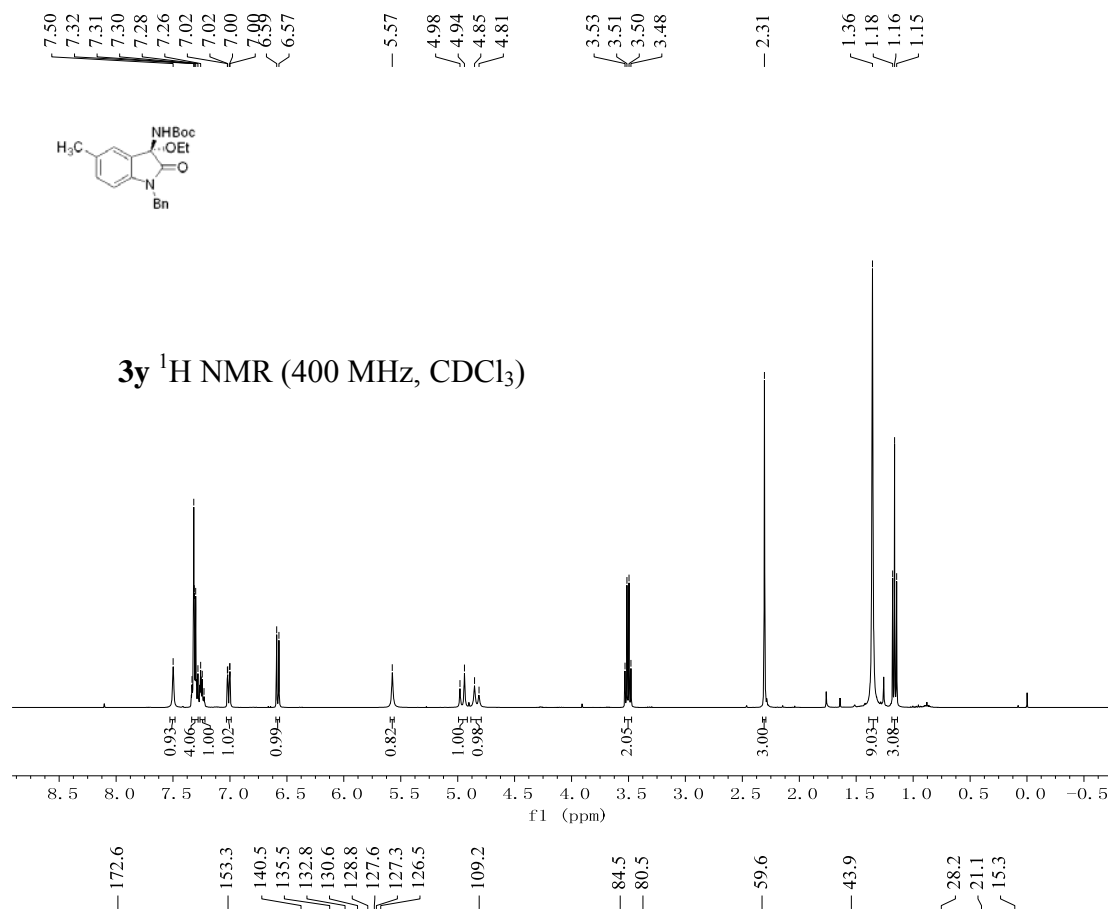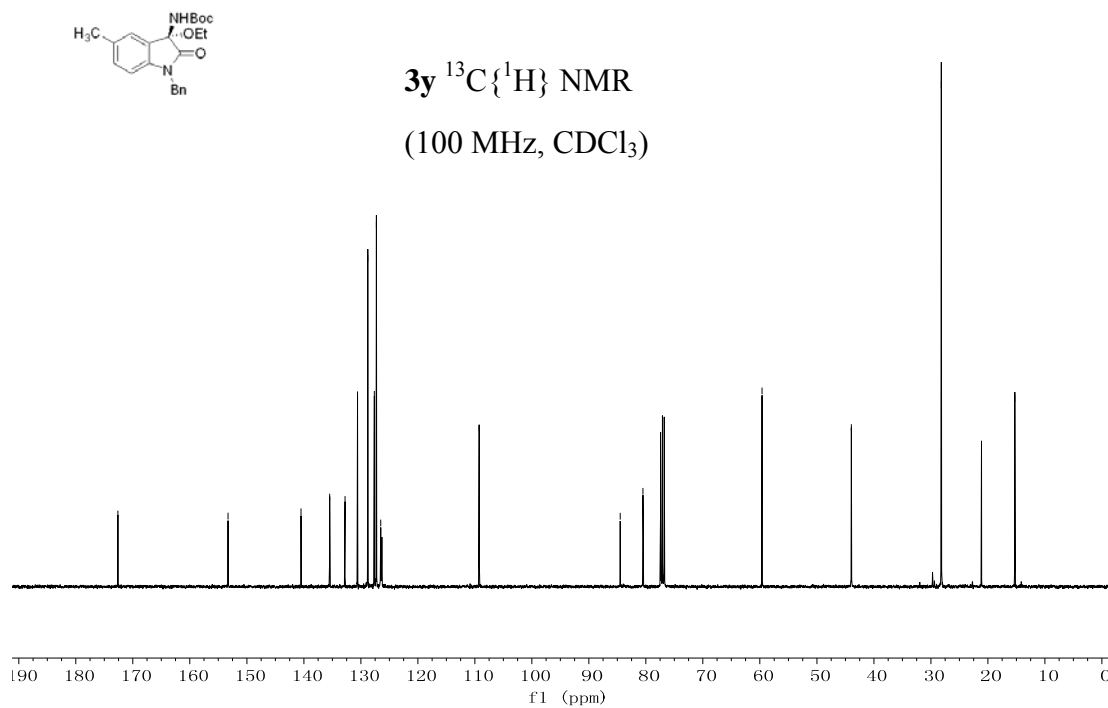

7.51  
7.50  
7.49  
7.33  
7.31  
7.29  
7.26  
7.25  
7.23  
7.22  
7.21  
7.00  
6.99  
6.99

— 5.58 — 5.19

3.56  
3.54  
3.53  
3.51

— 2.23

1.36  
1.18  
1.17  
1.15

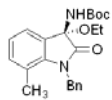

**3z**  $^1\text{H}$  NMR (400 MHz,  $\text{CDCl}_3$ )

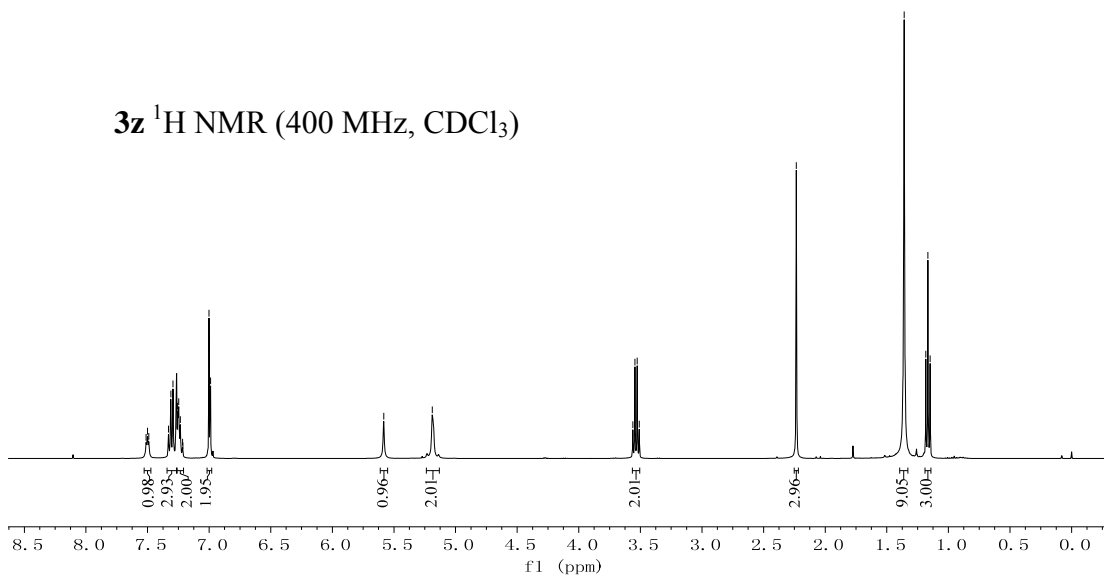

173.7

153.3

141.1  
137.3  
134.5  
128.9  
127.2  
125.8  
123.3  
123.2  
120.1

83.8  
80.5

59.6

45.3

28.2

18.8  
15.3

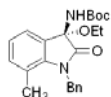

**3z**  $^{13}\text{C}$  { $^1\text{H}$ } NMR  
(100 MHz,  $\text{CDCl}_3$ )

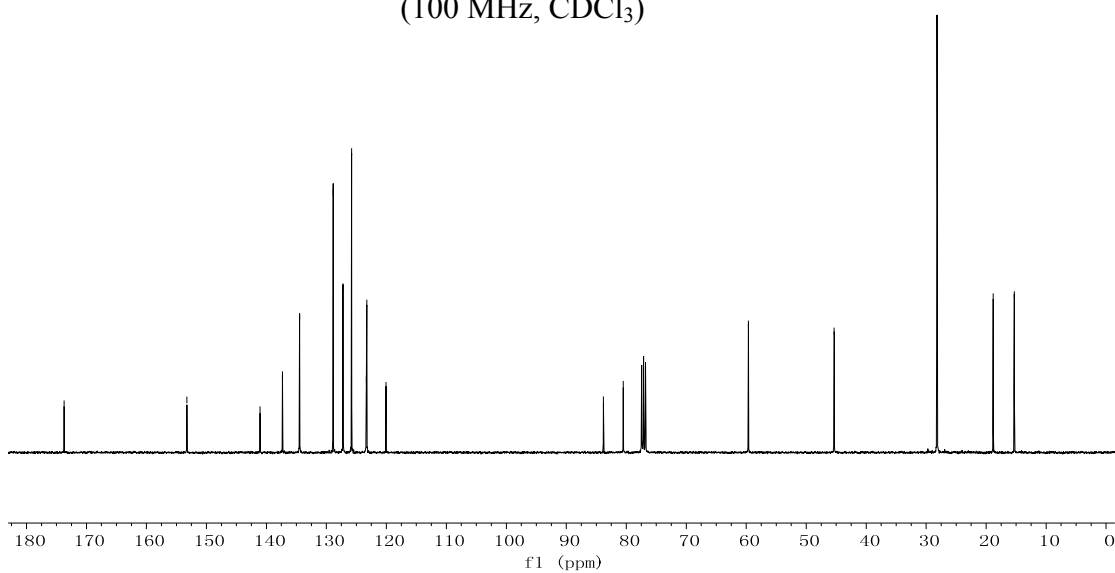

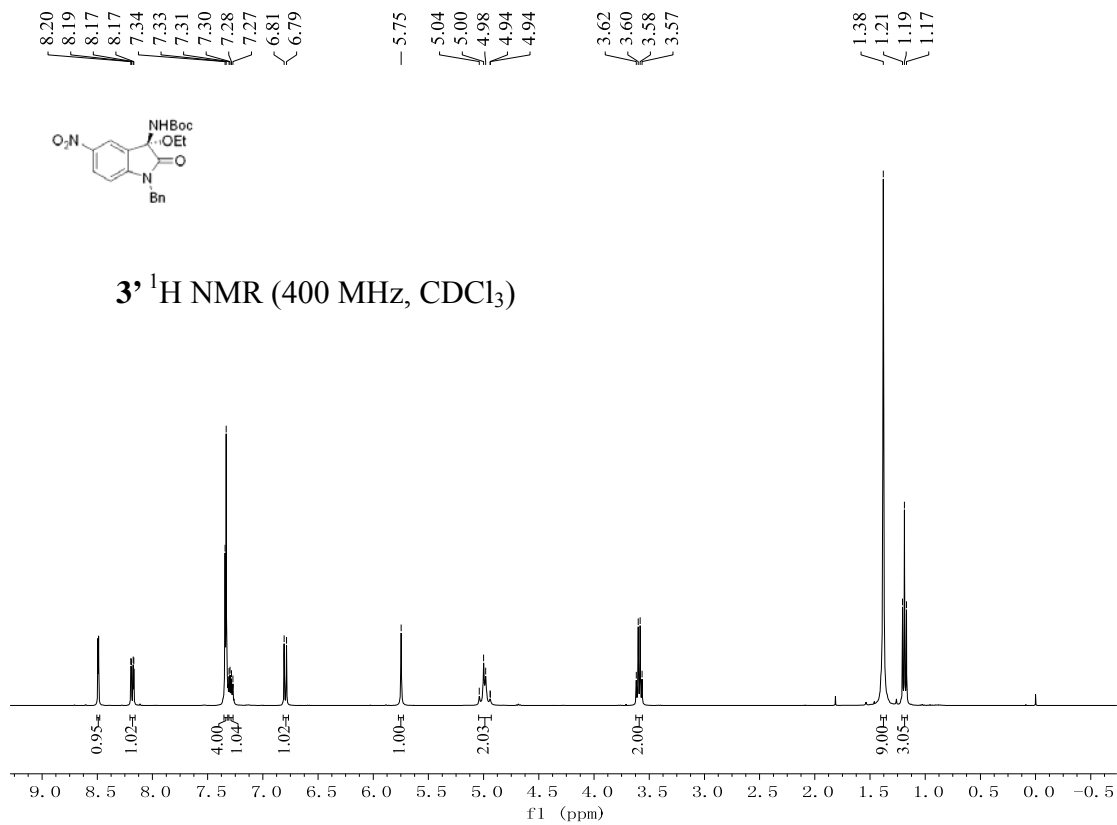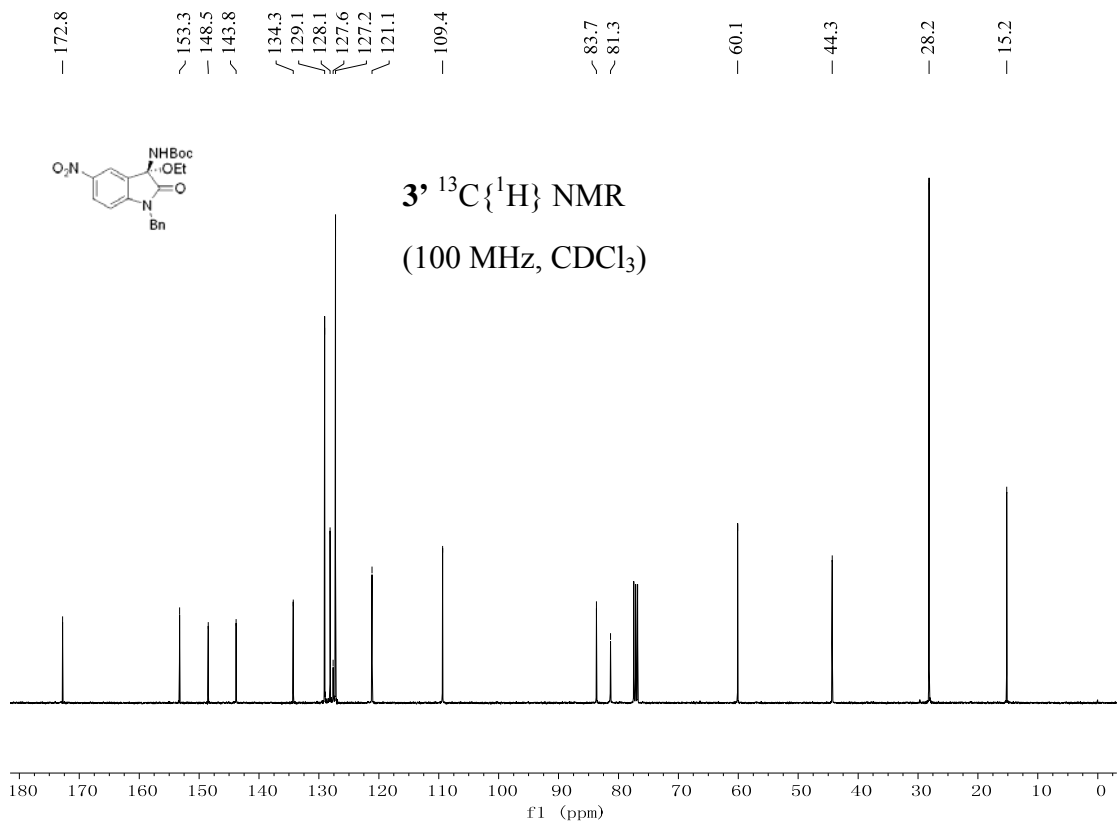



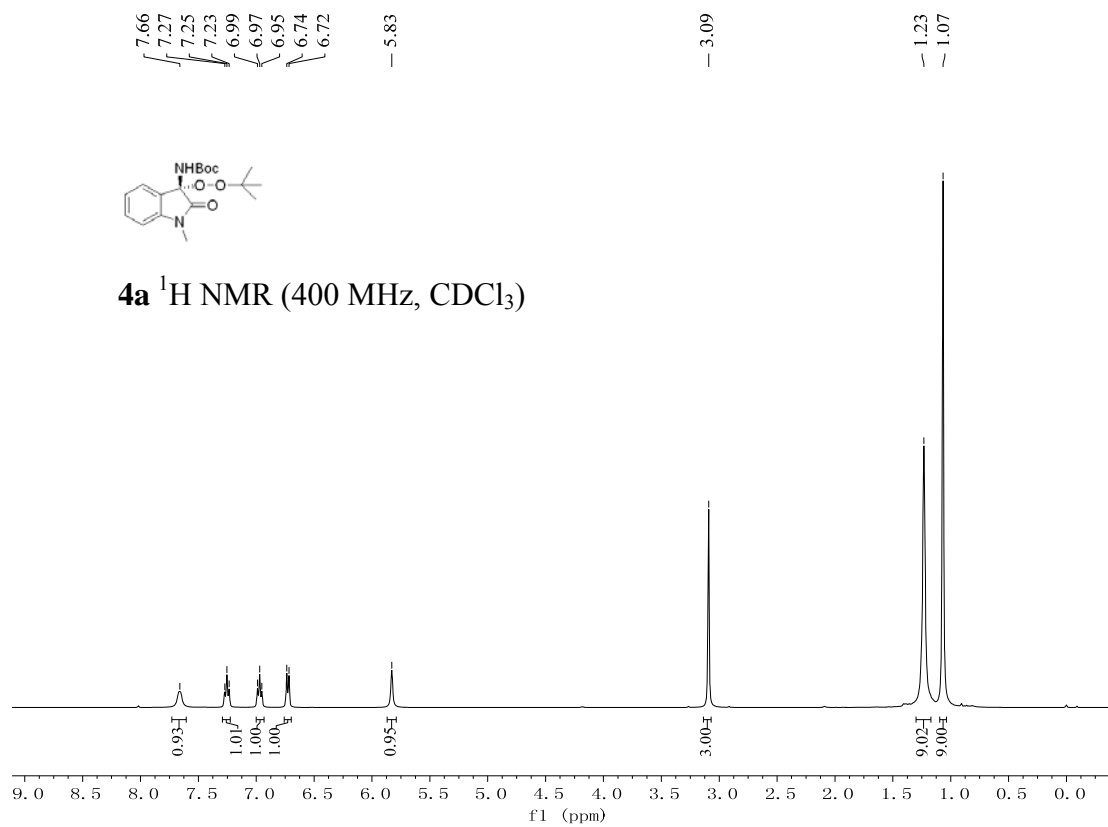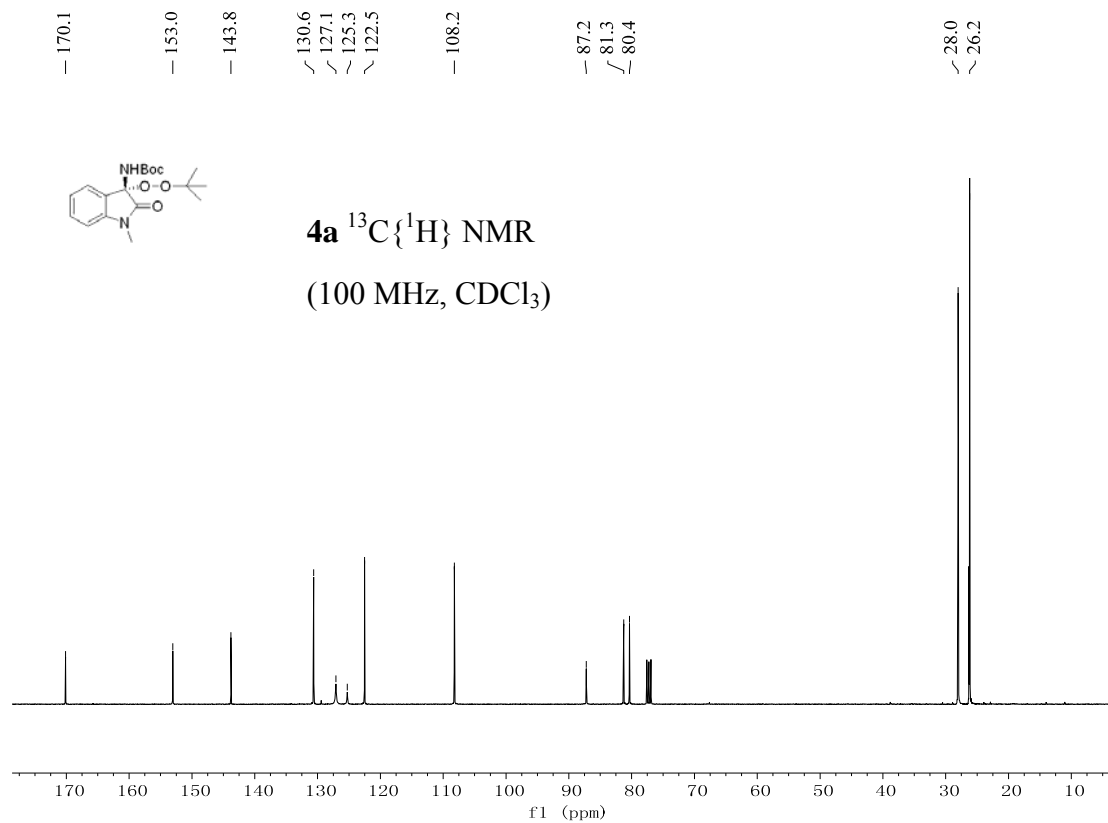

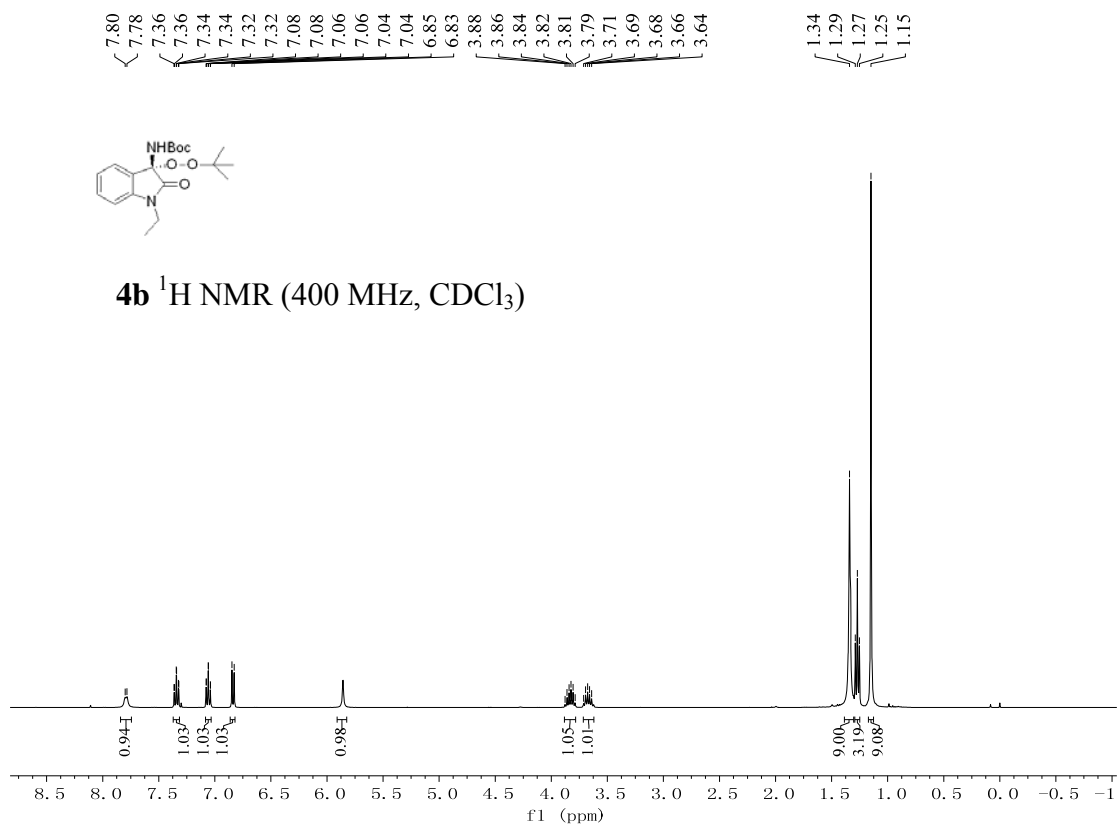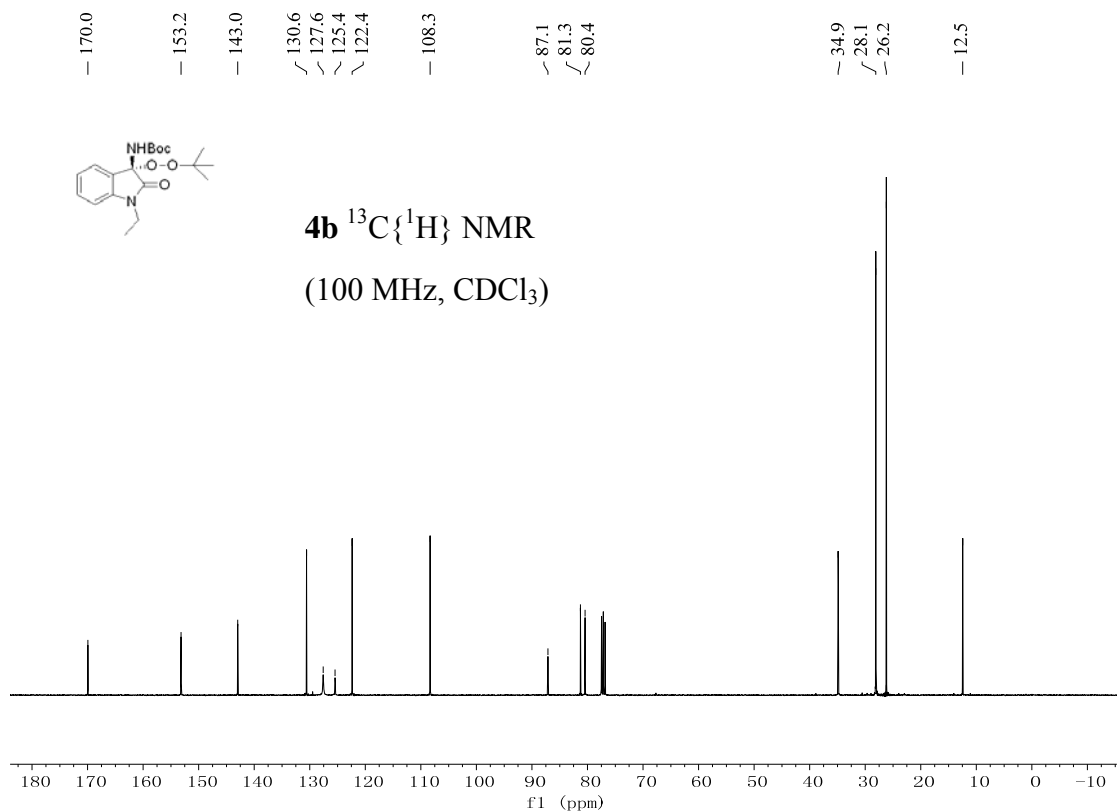

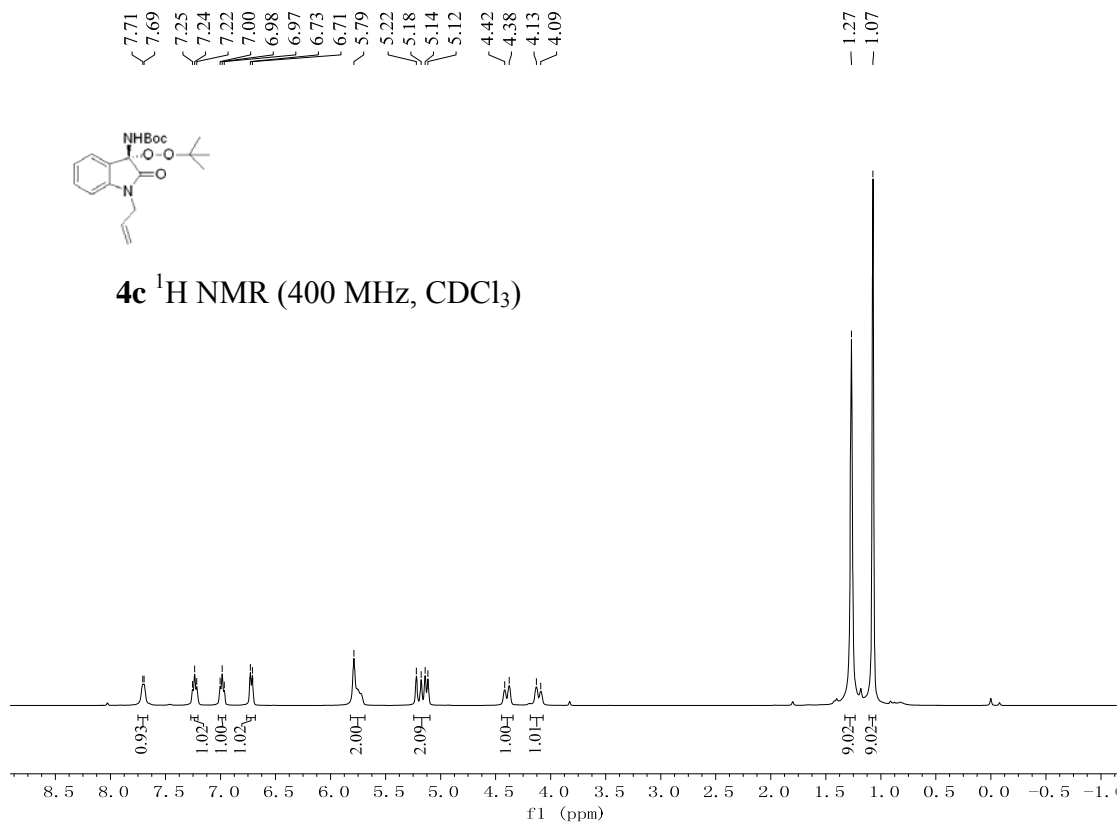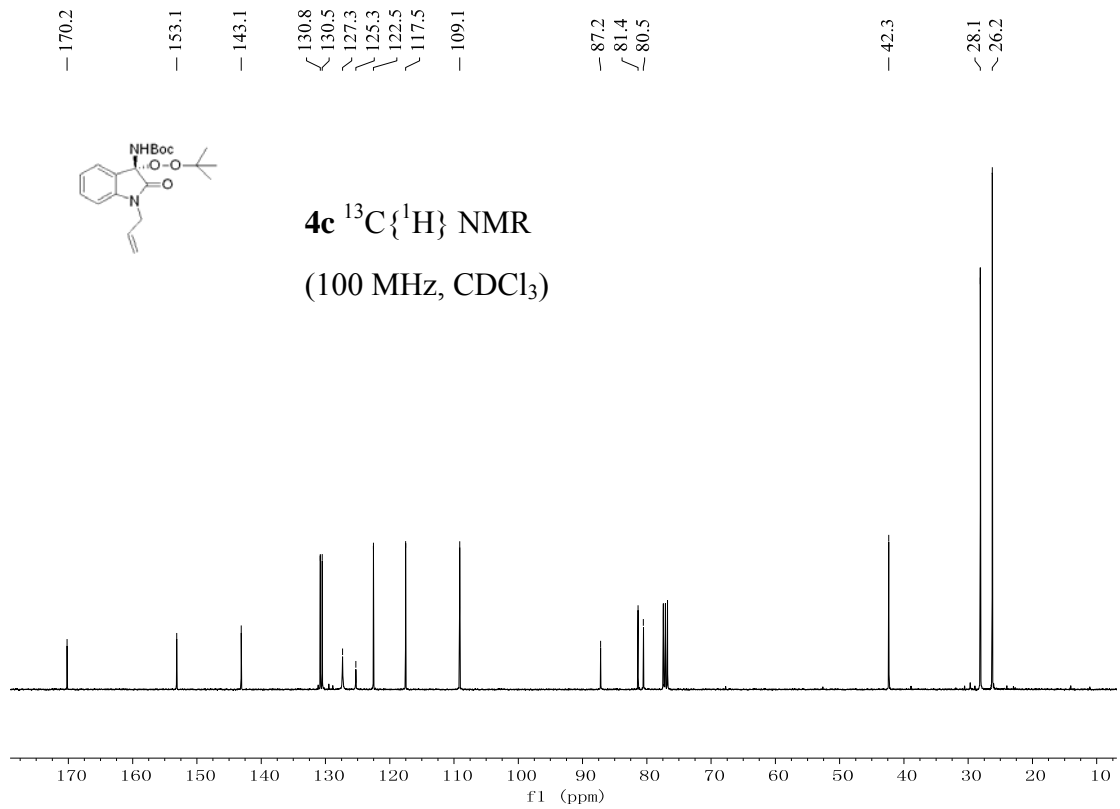

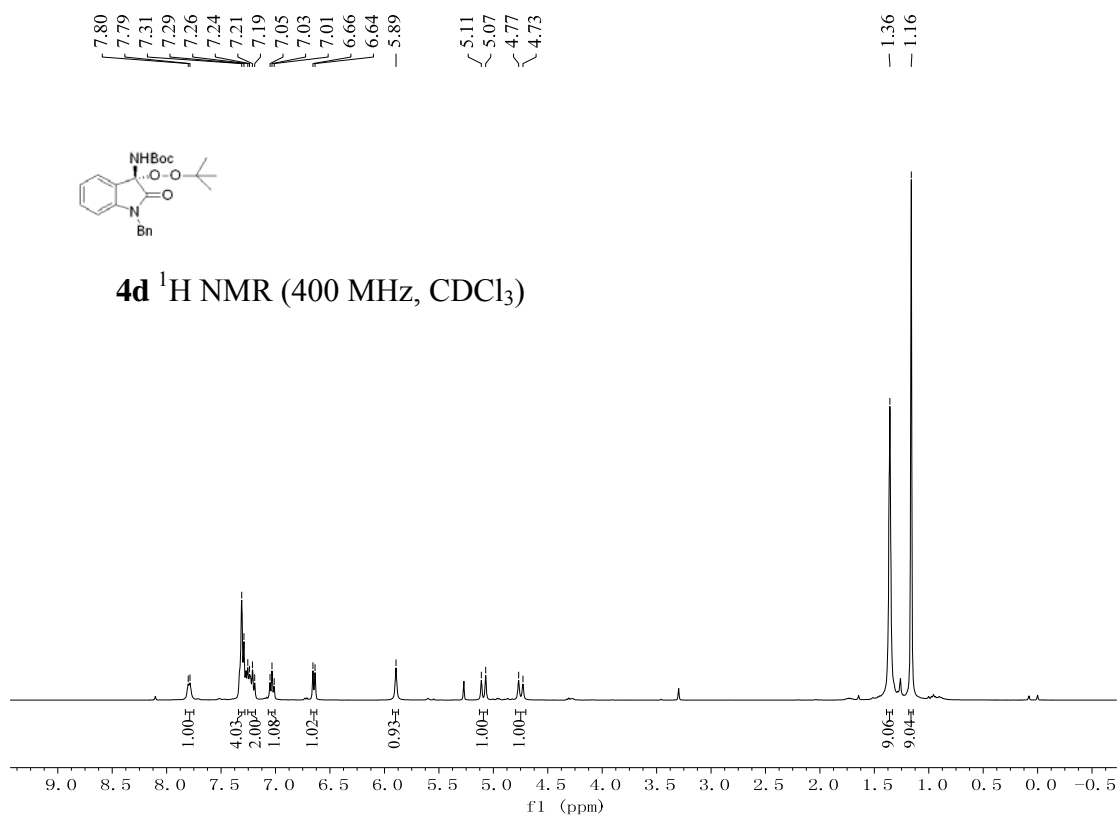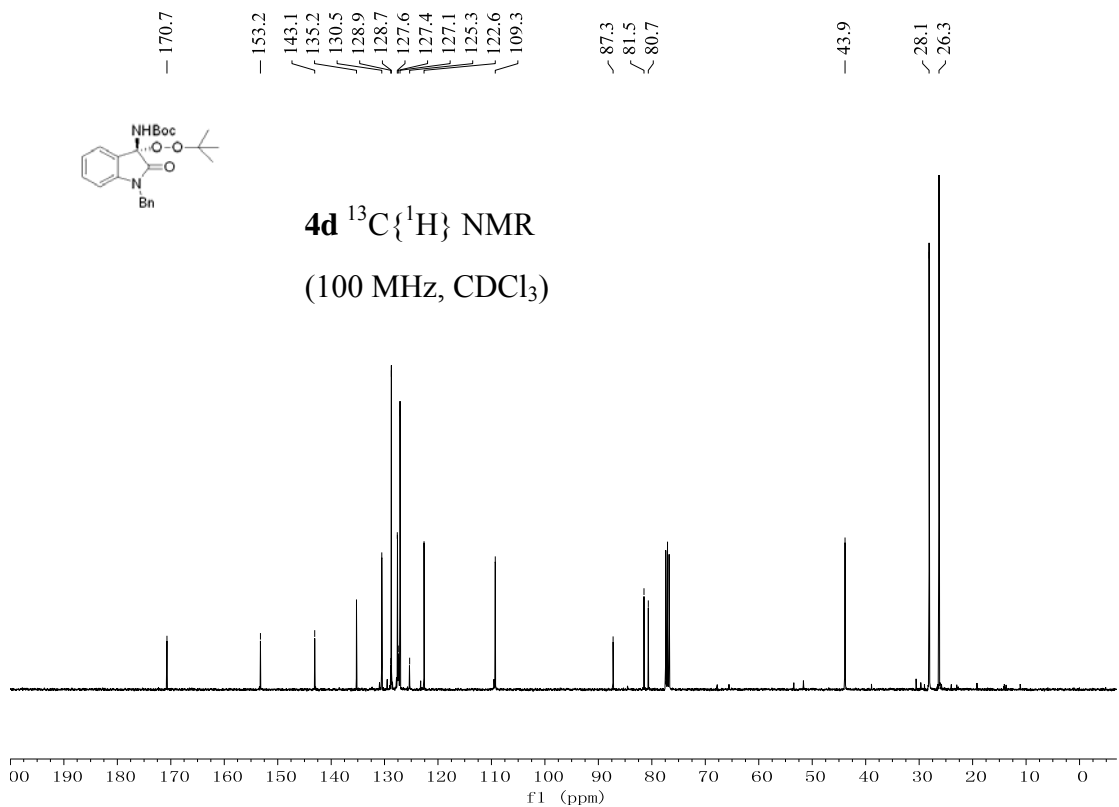

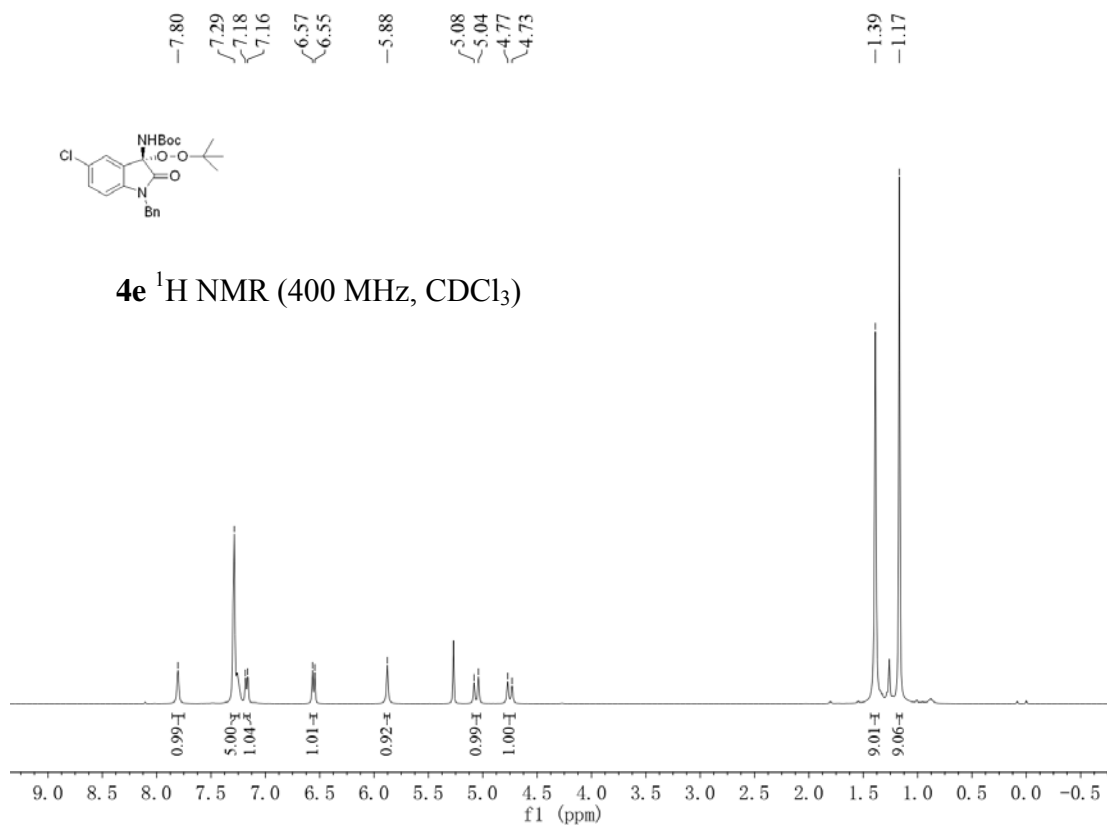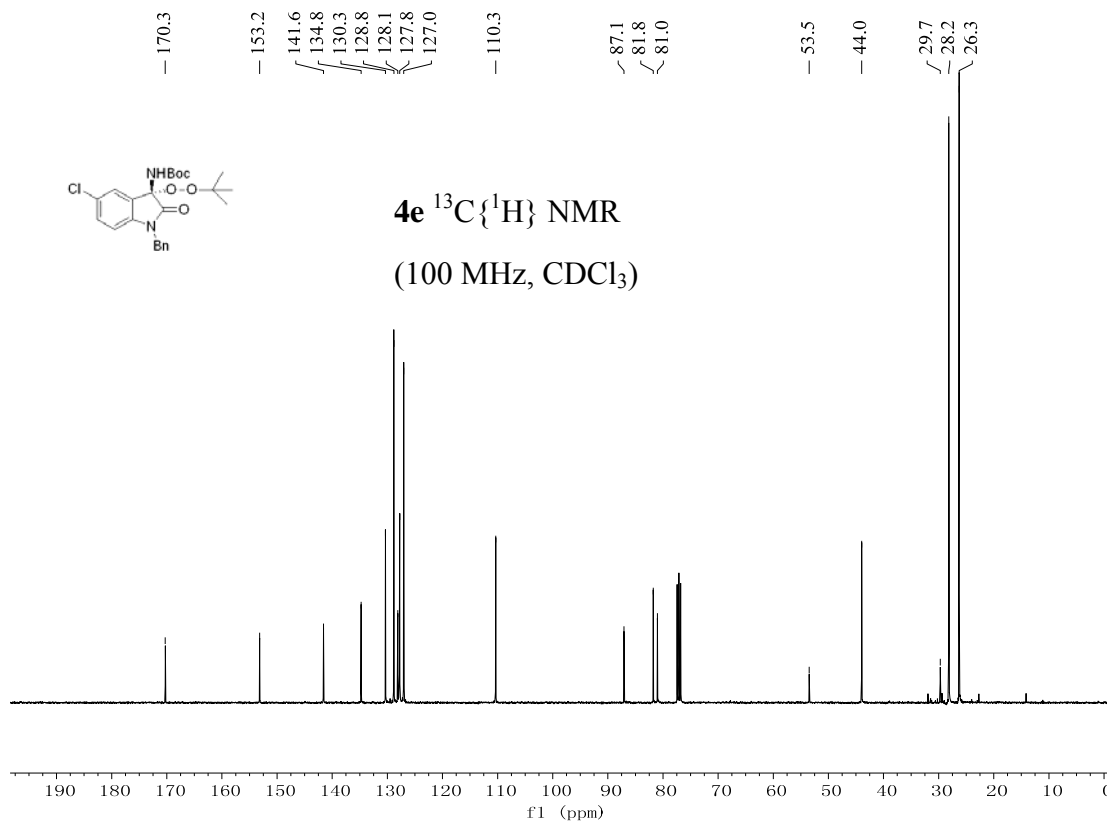

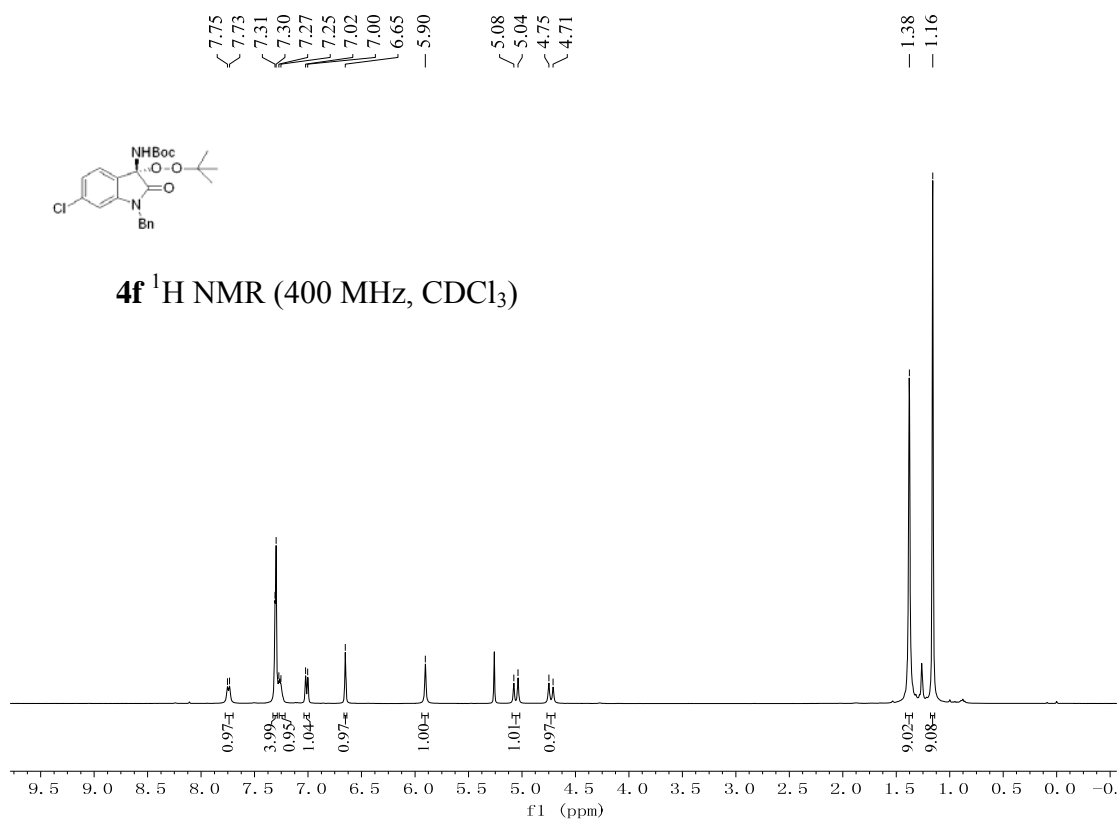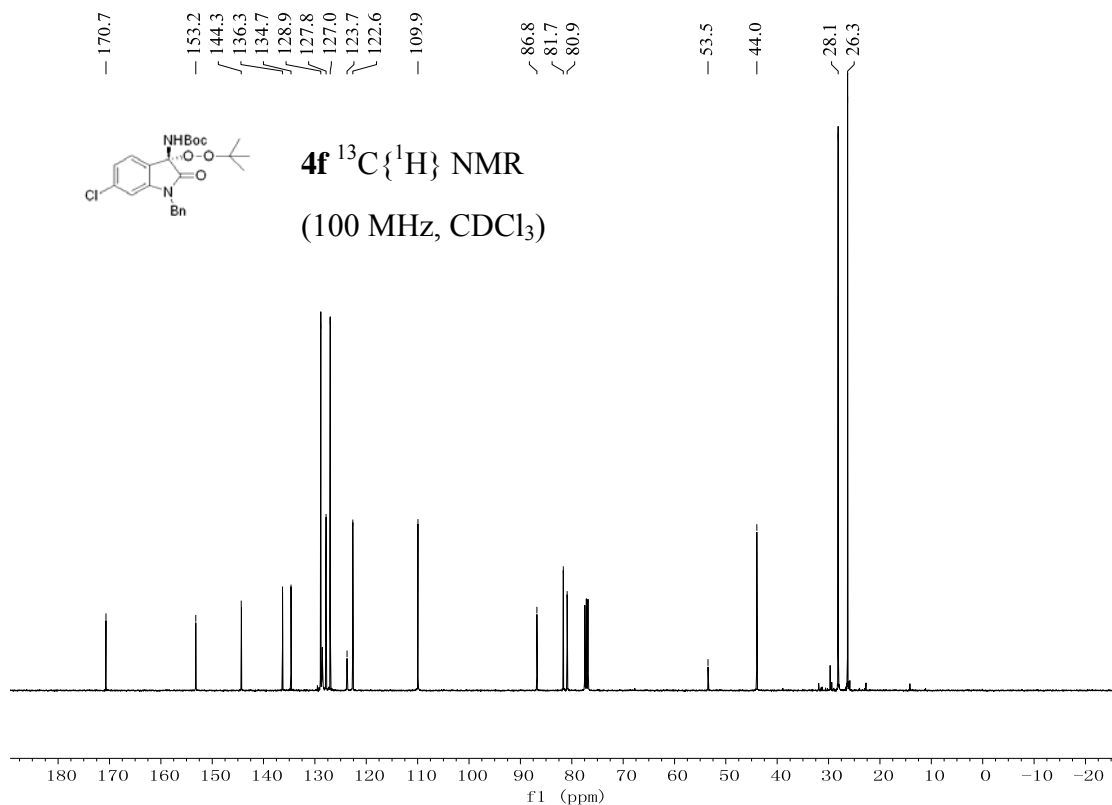

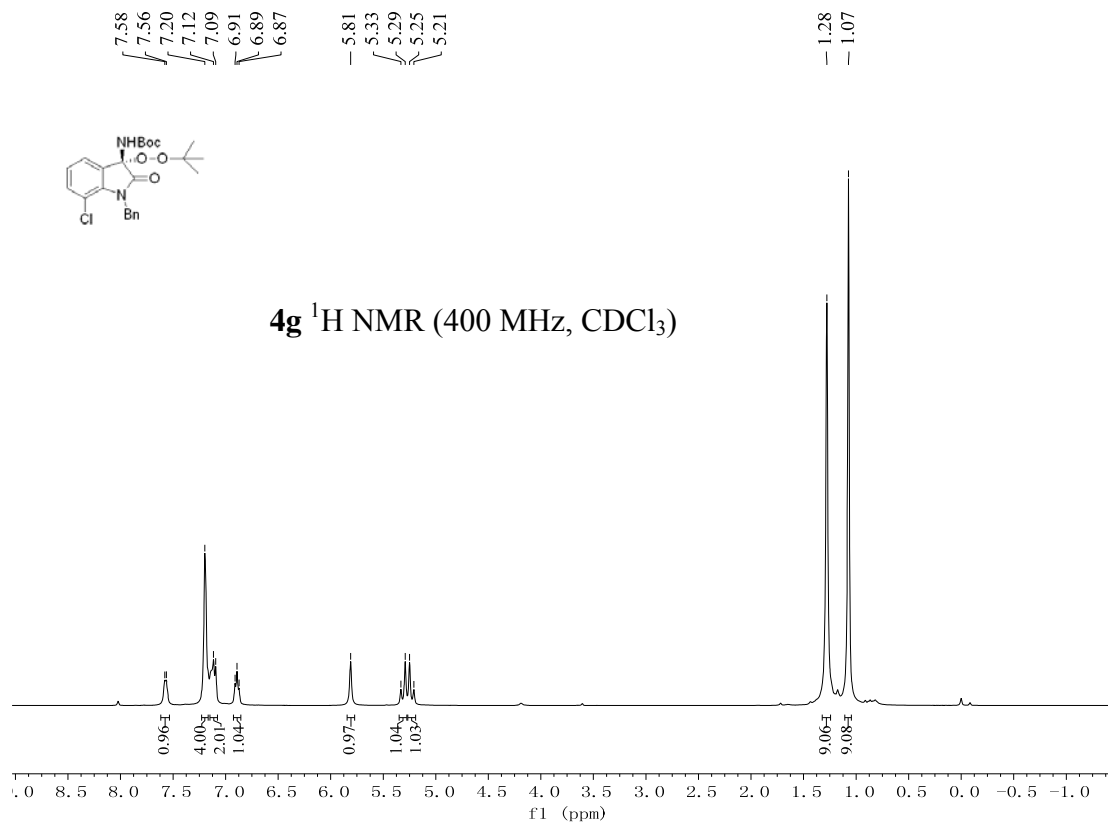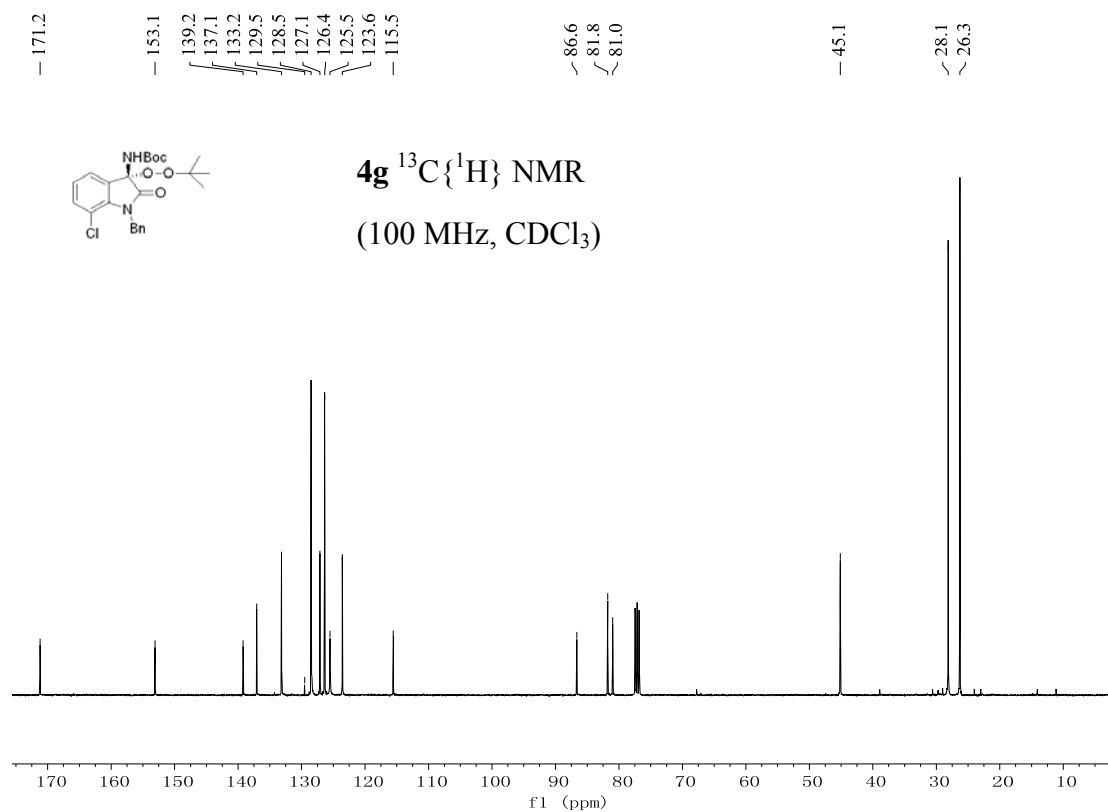

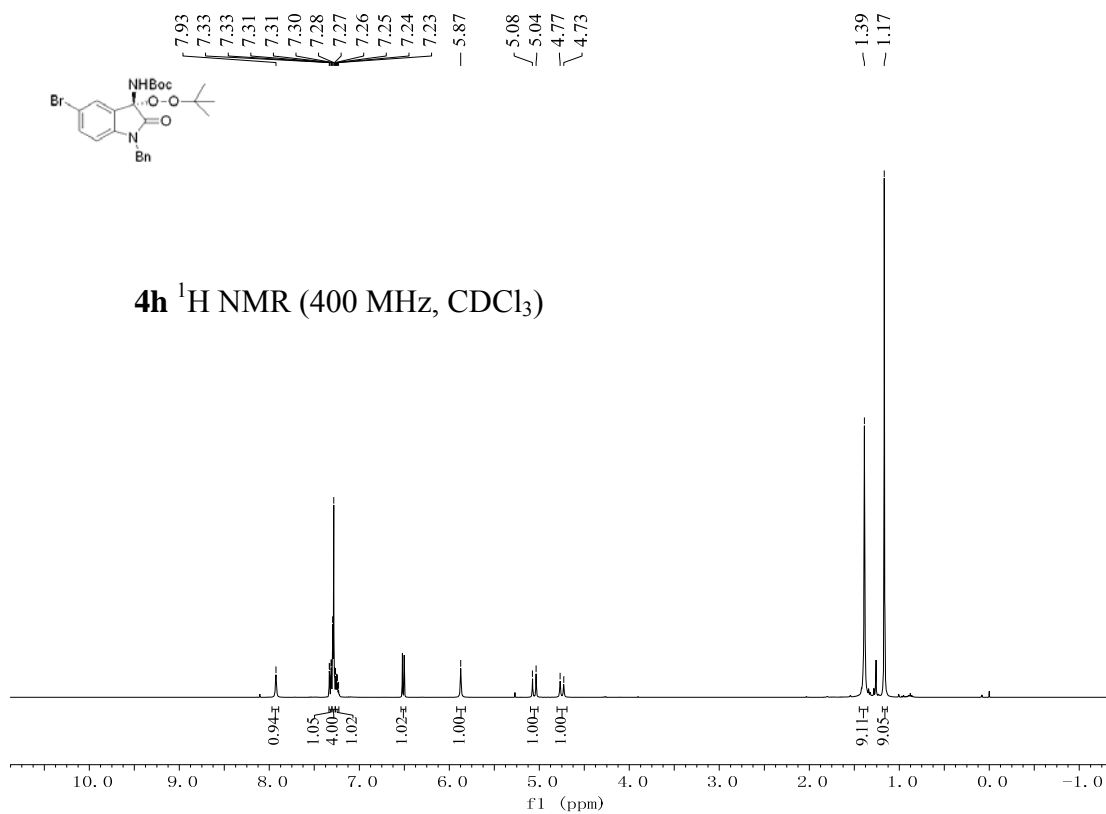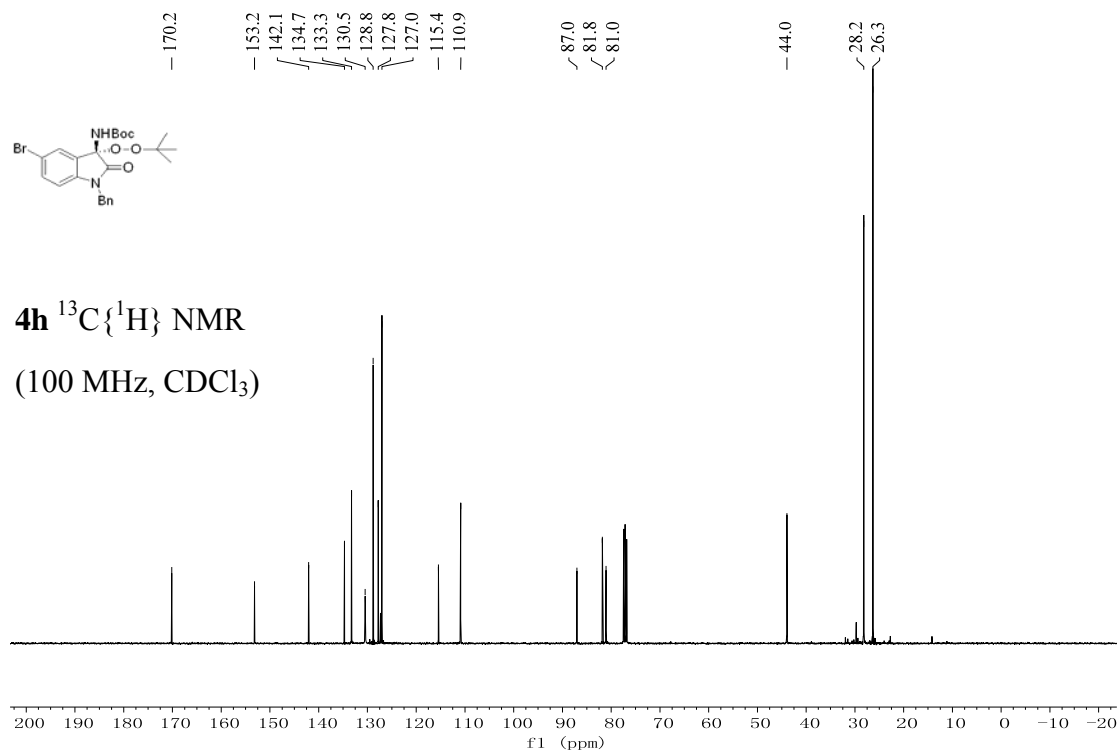



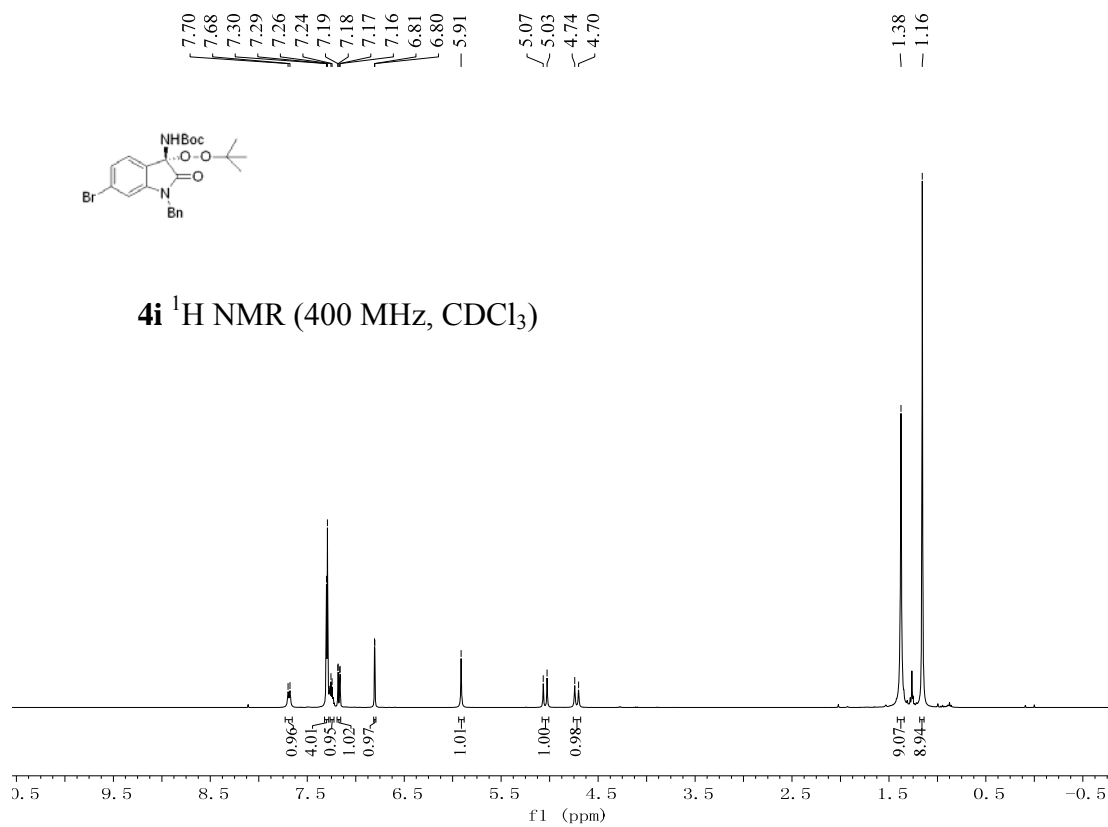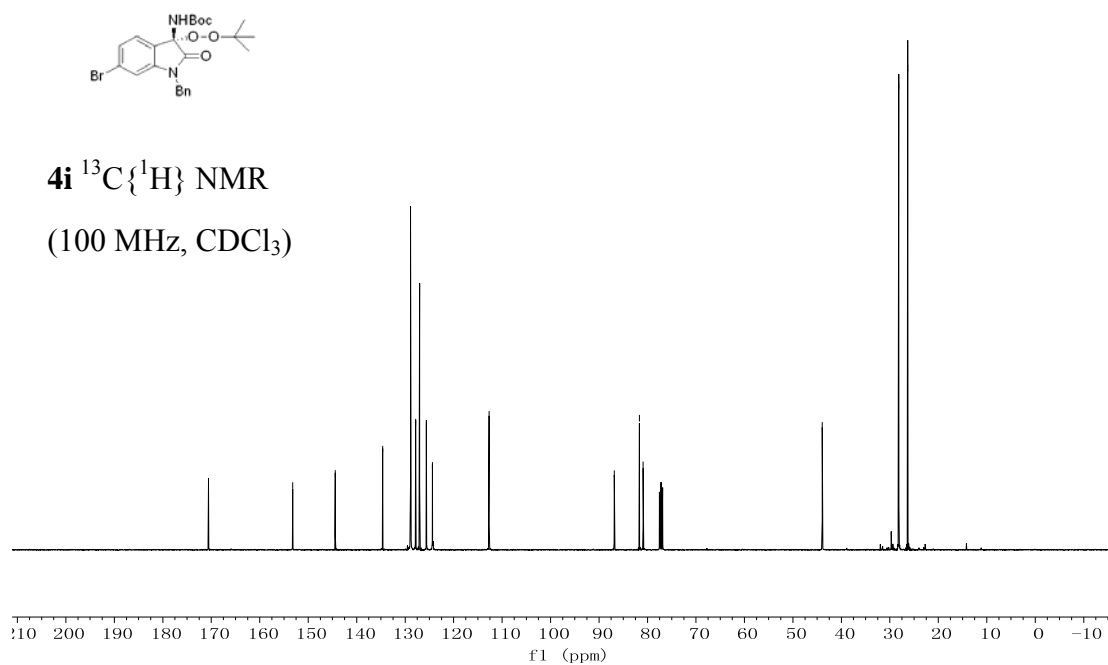

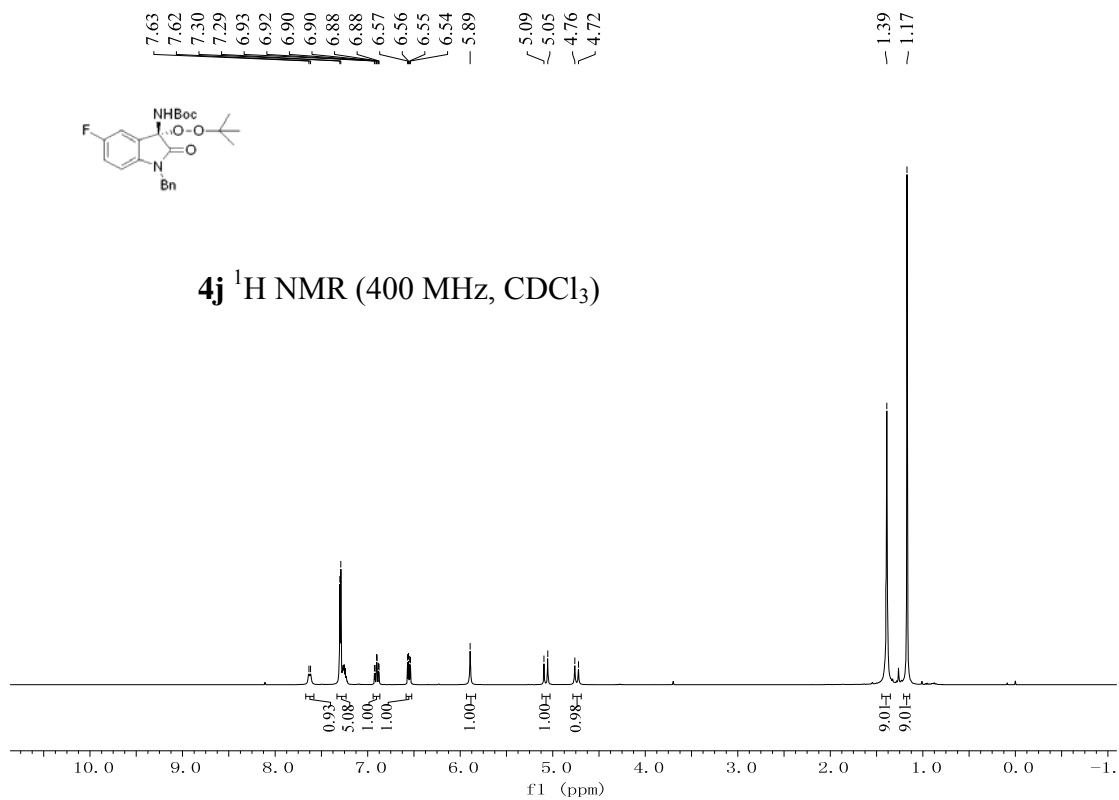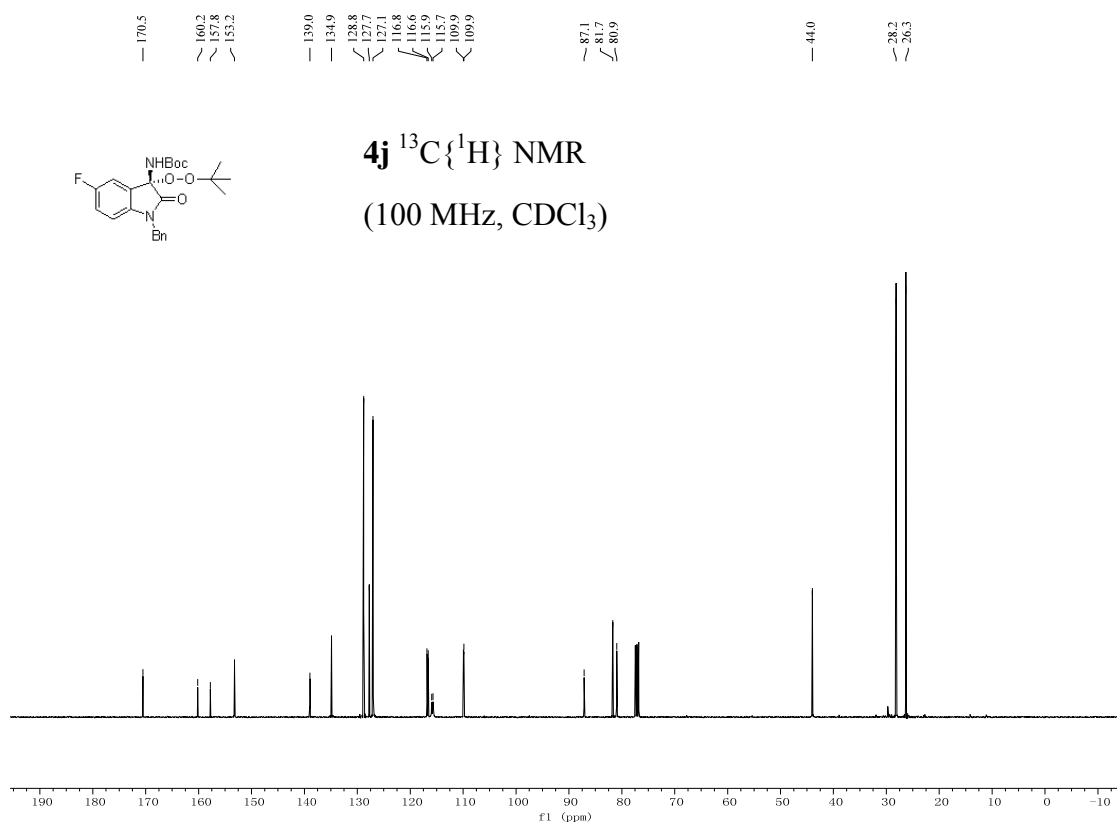

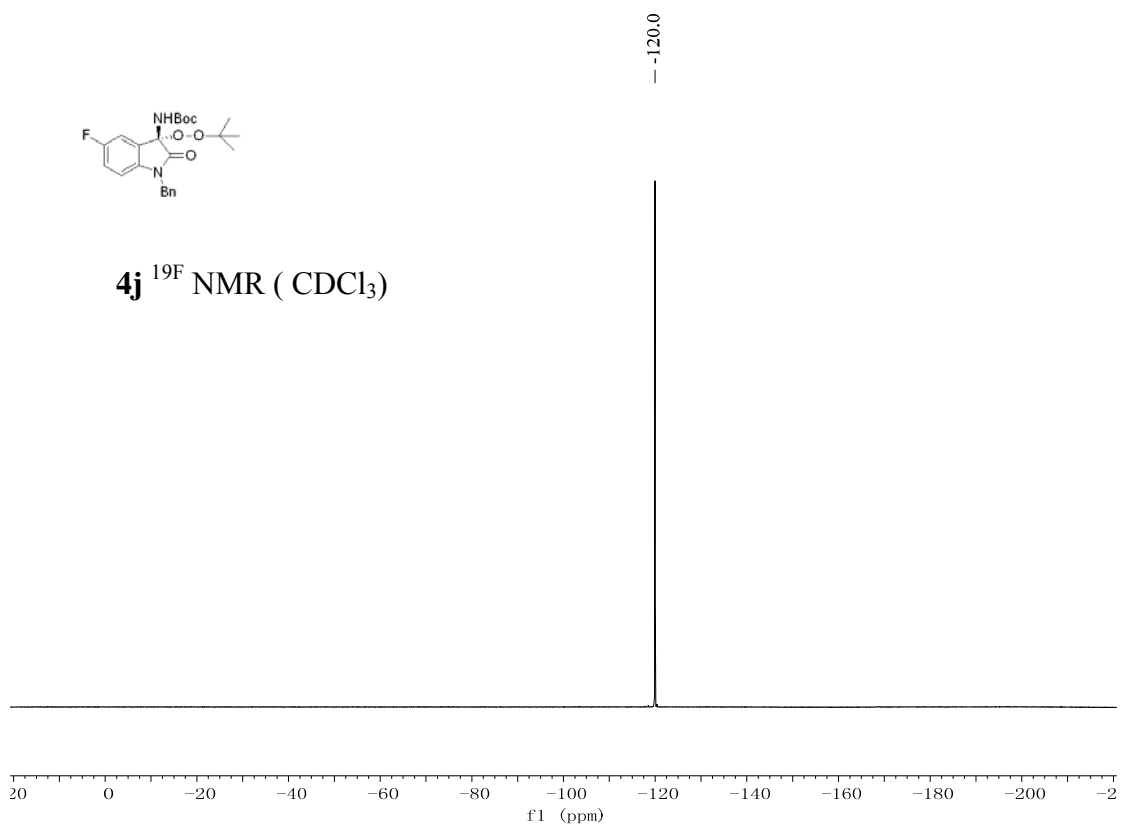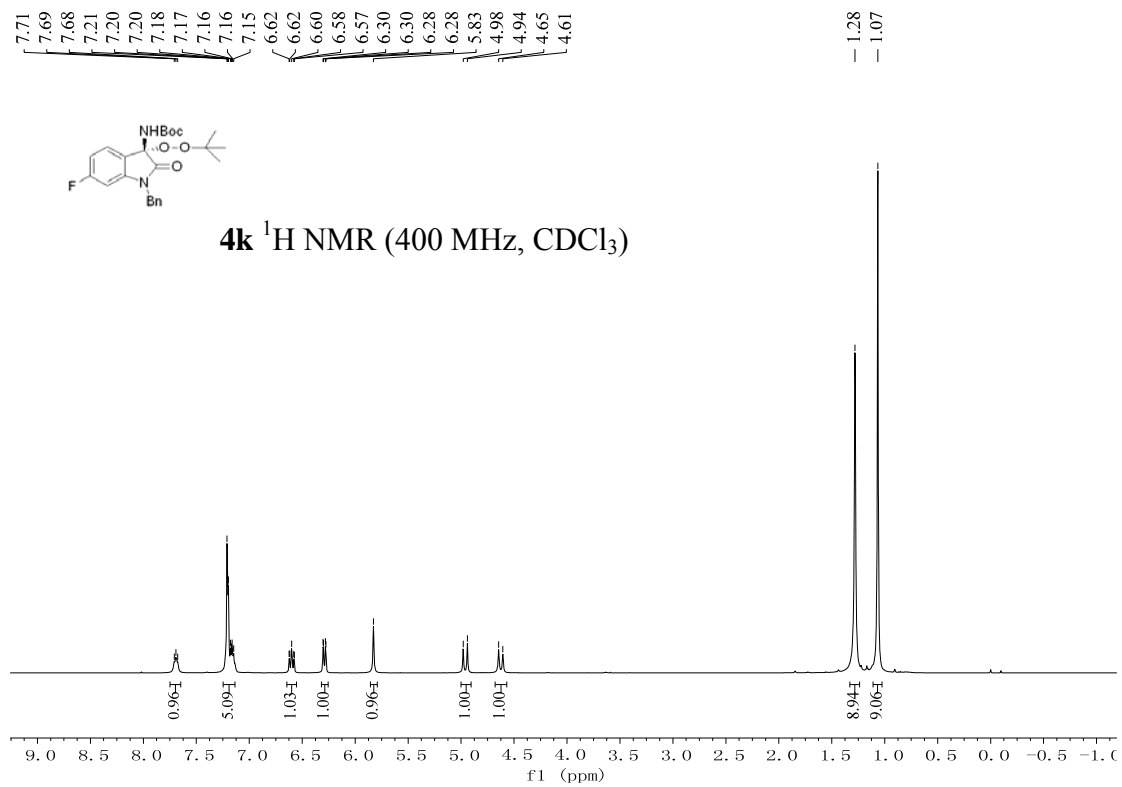

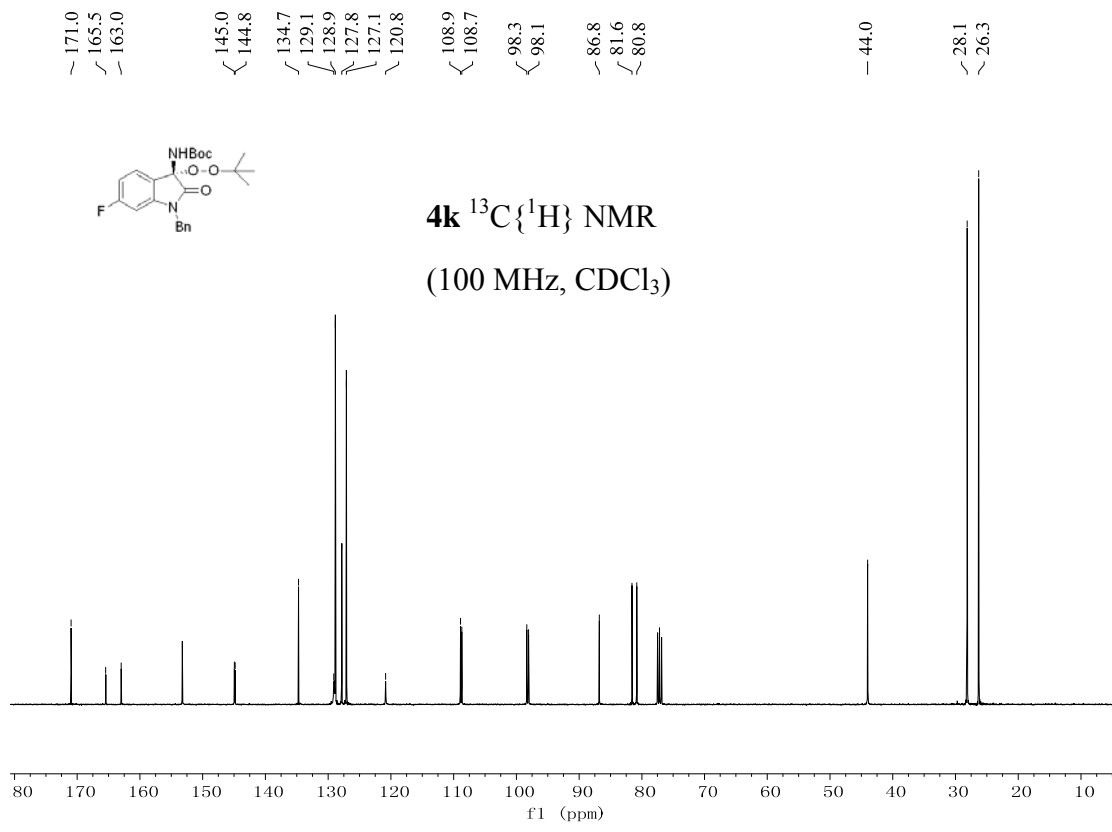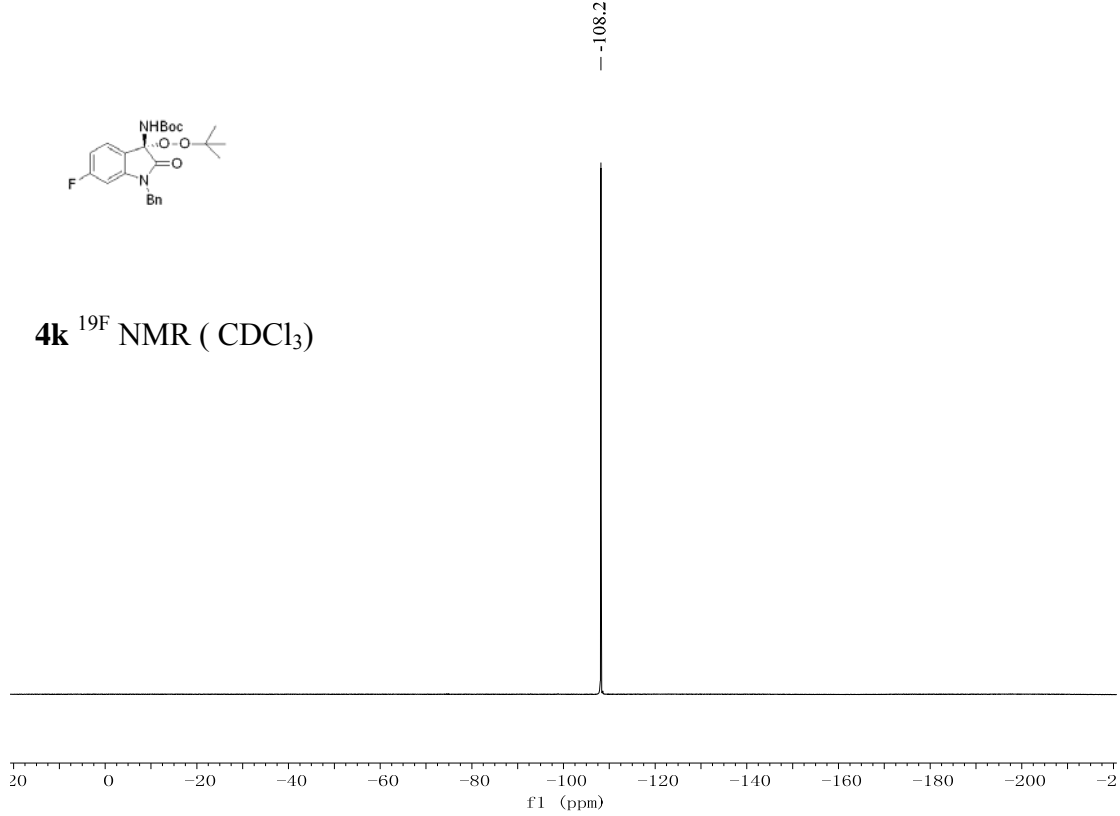

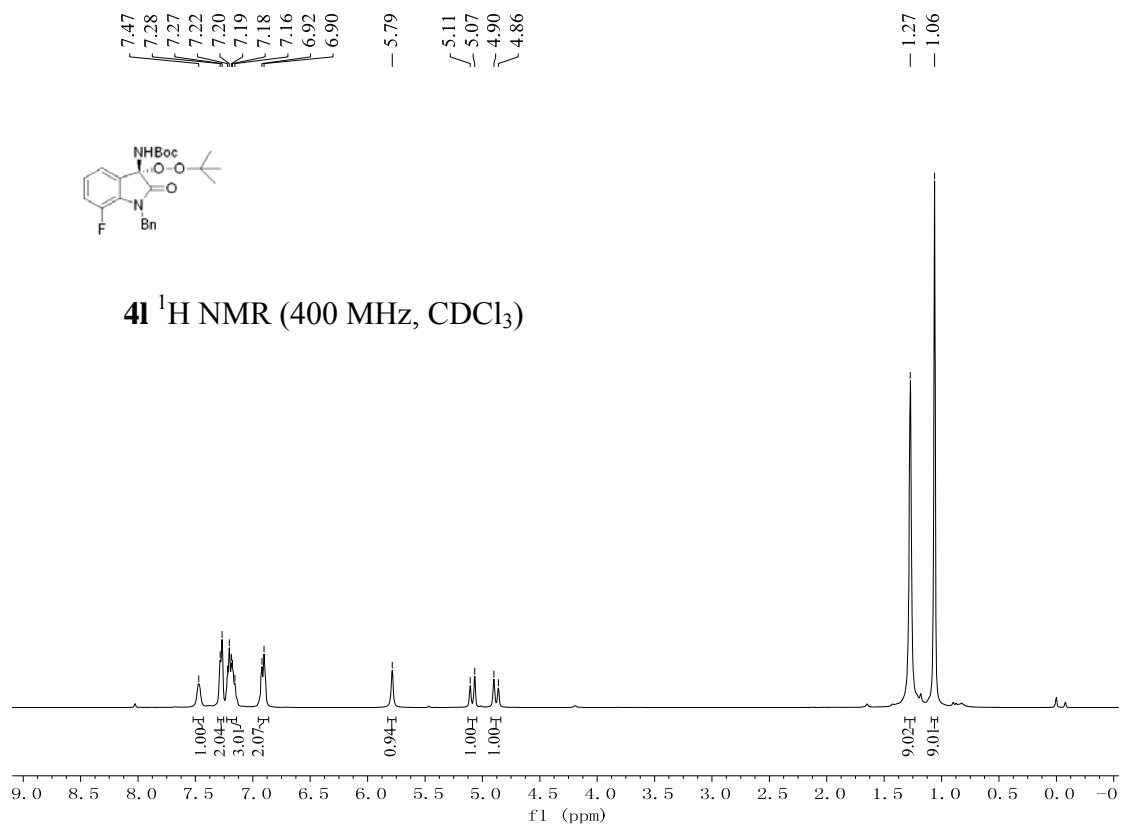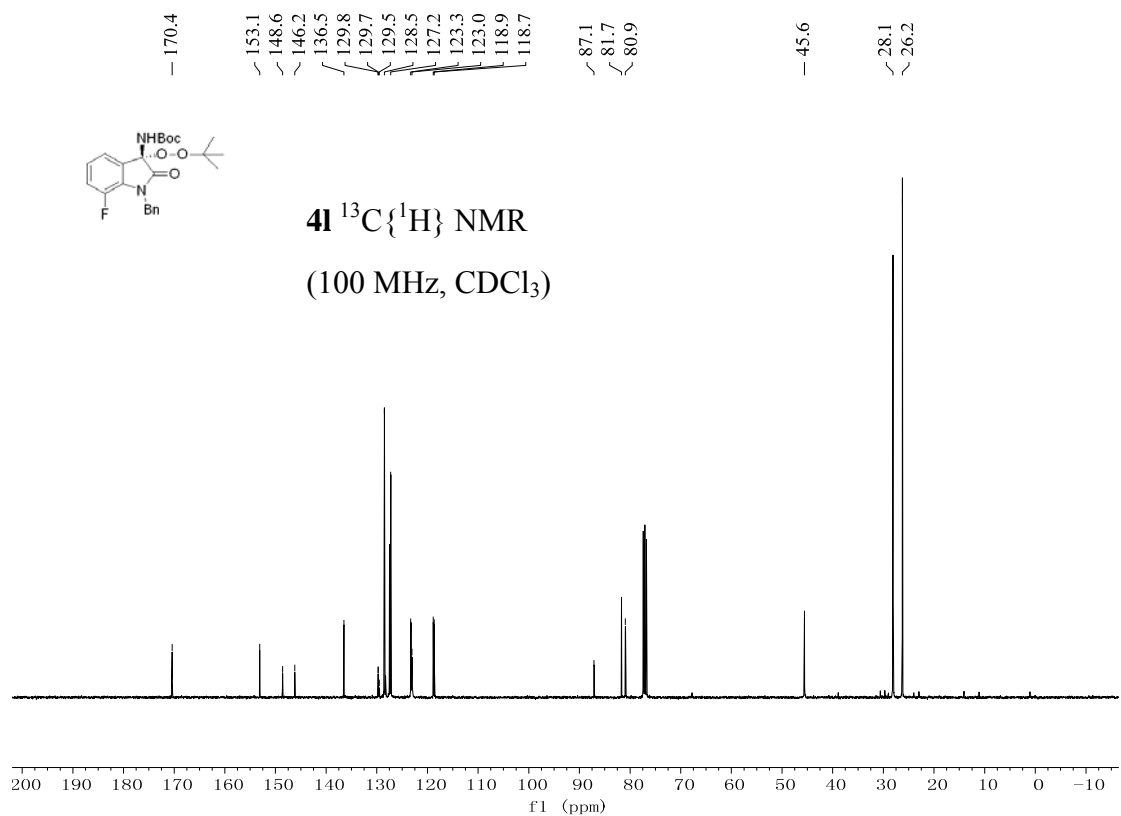

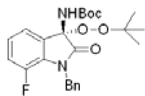

**4l**  $^{19}\text{F}$  NMR (  $\text{CDCl}_3$  )

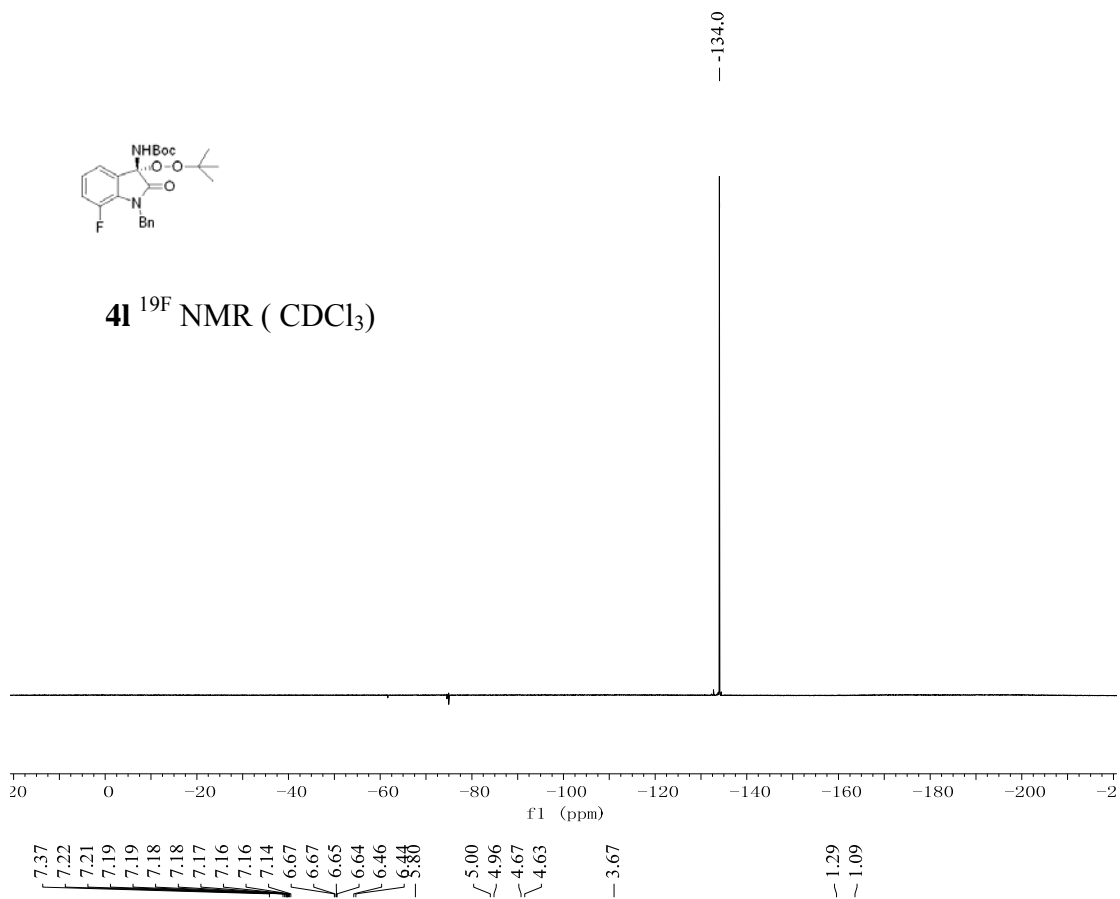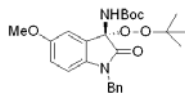

**4m**  $^1\text{H}$  NMR (400 MHz,  $\text{CDCl}_3$  )

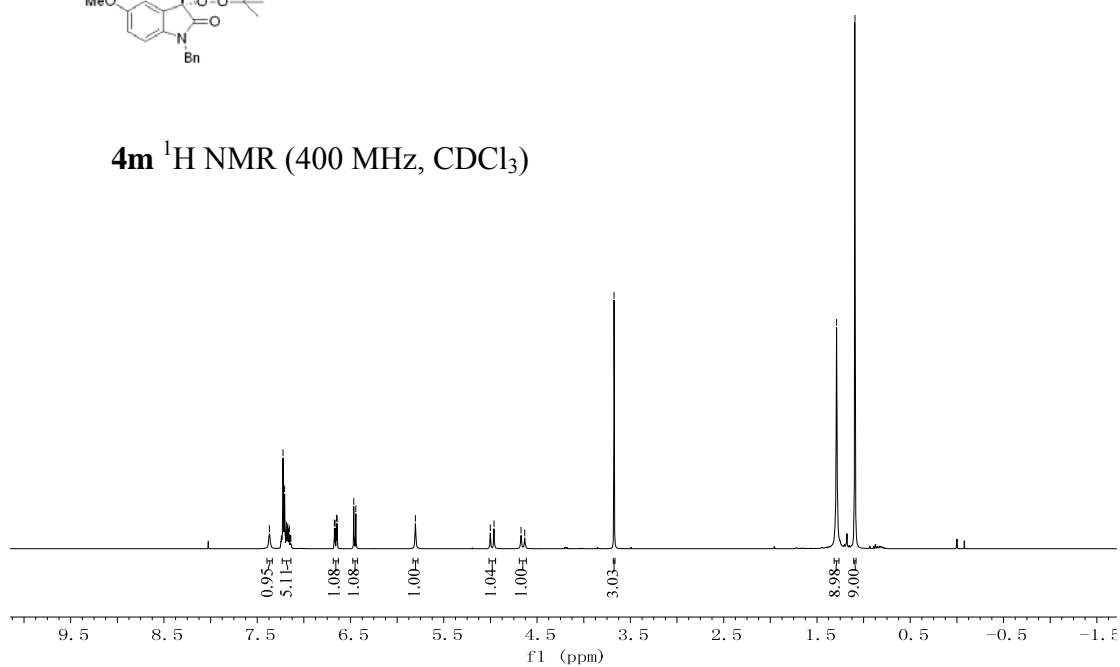

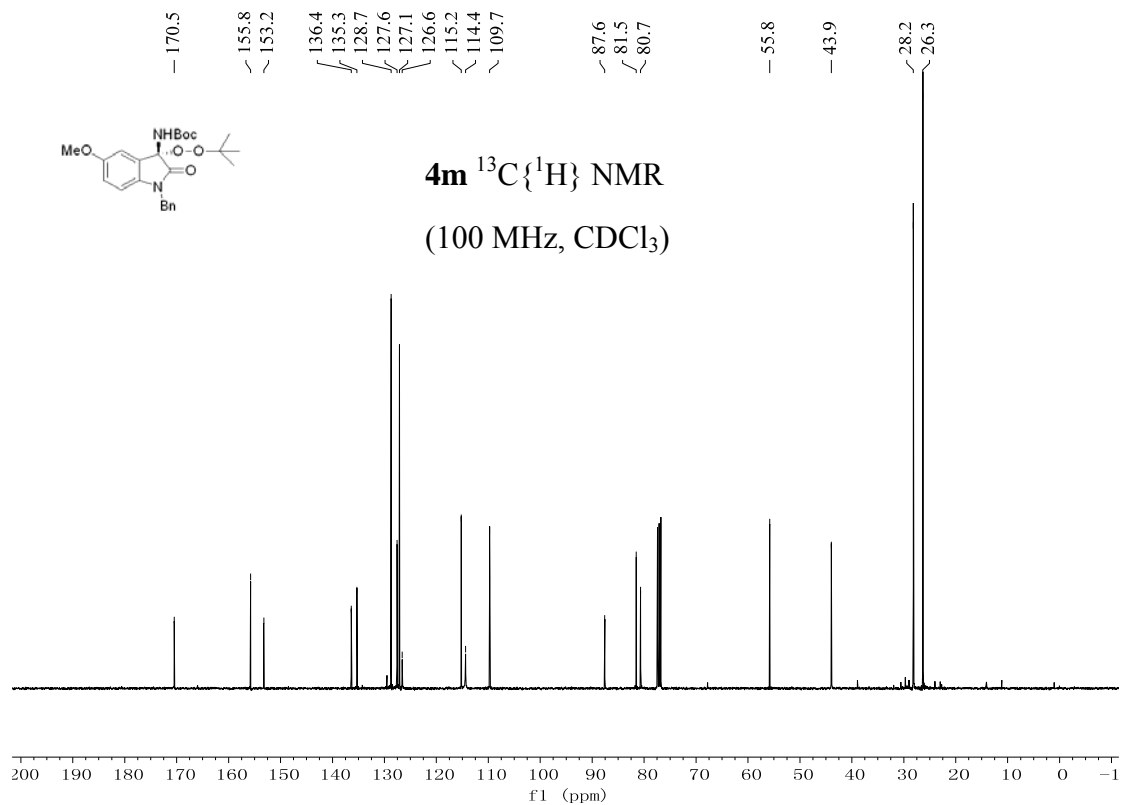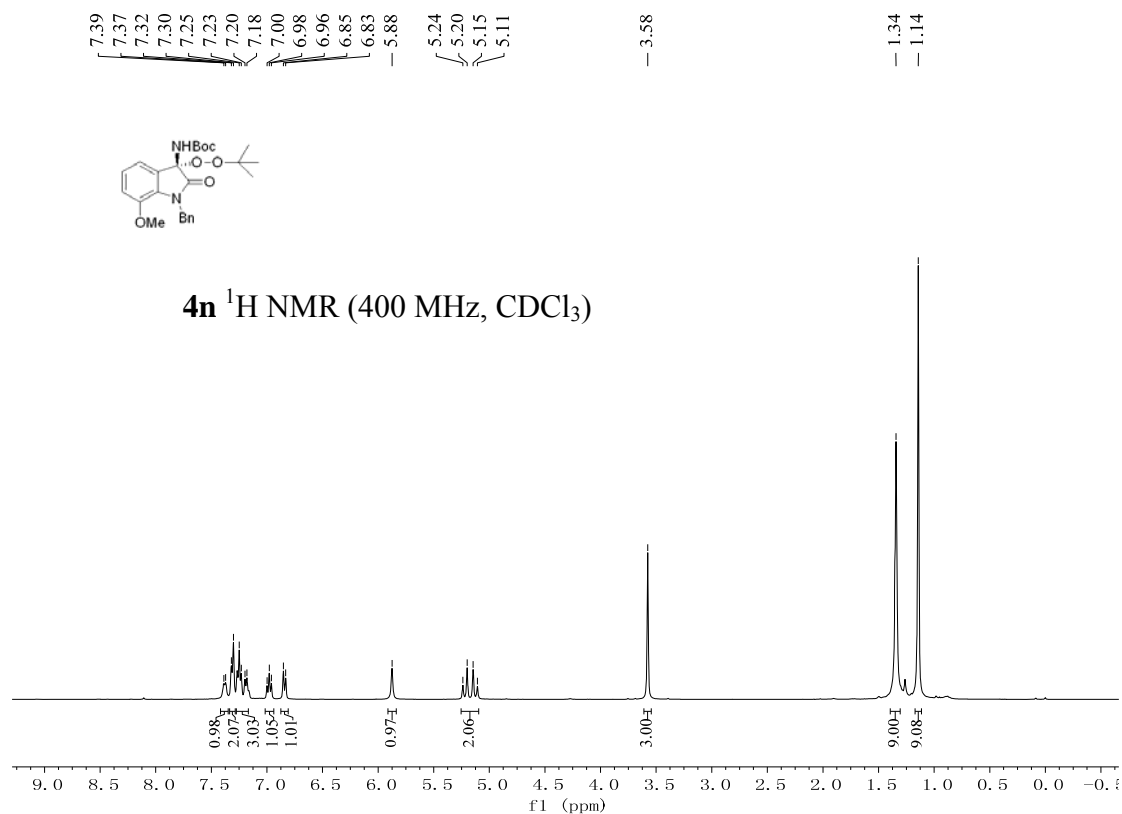

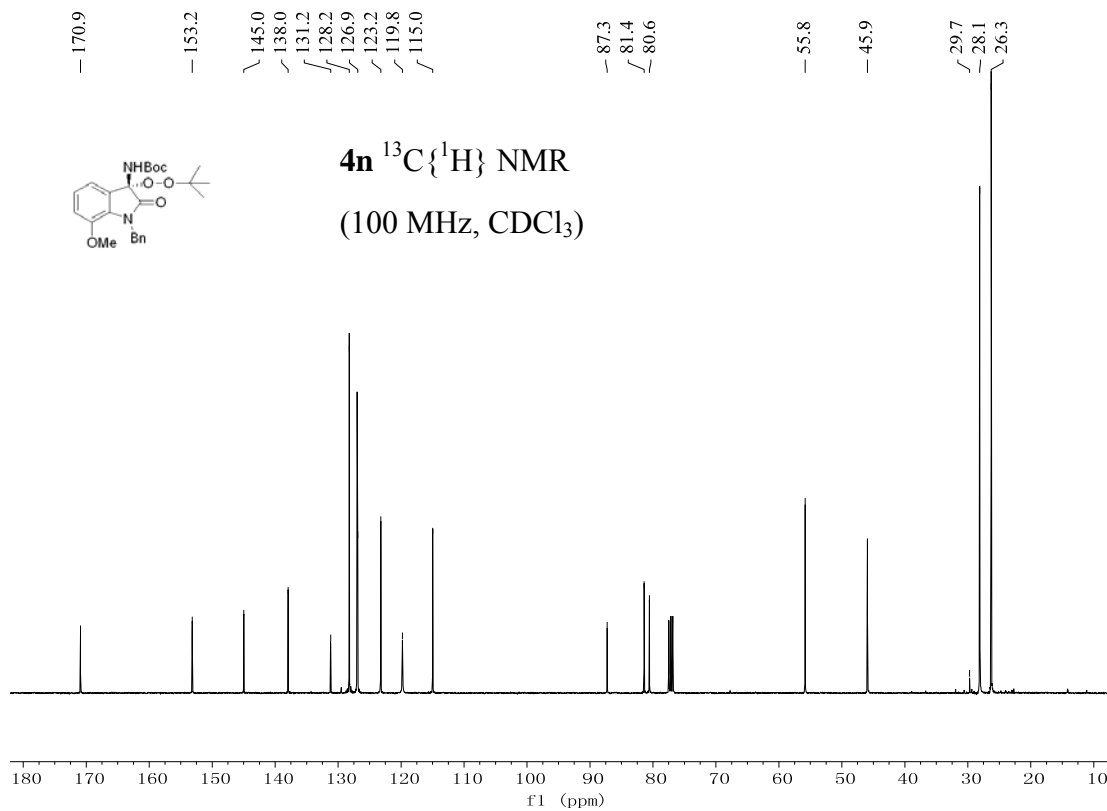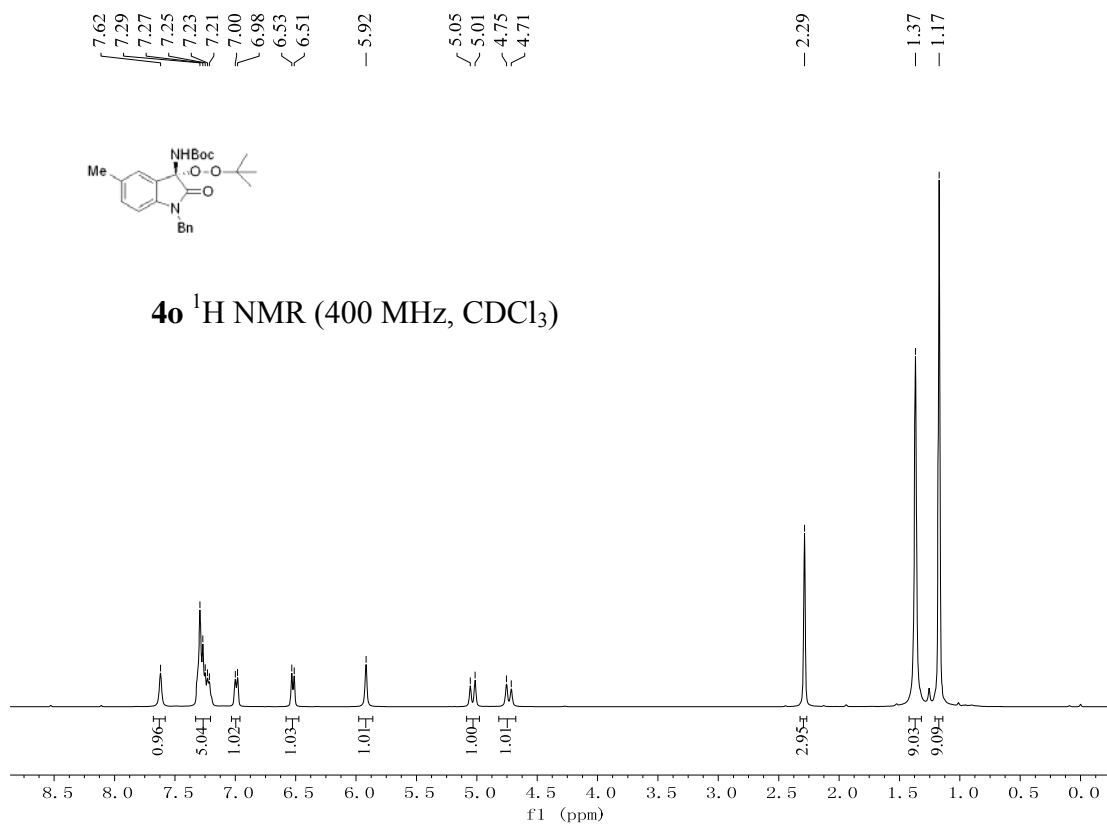



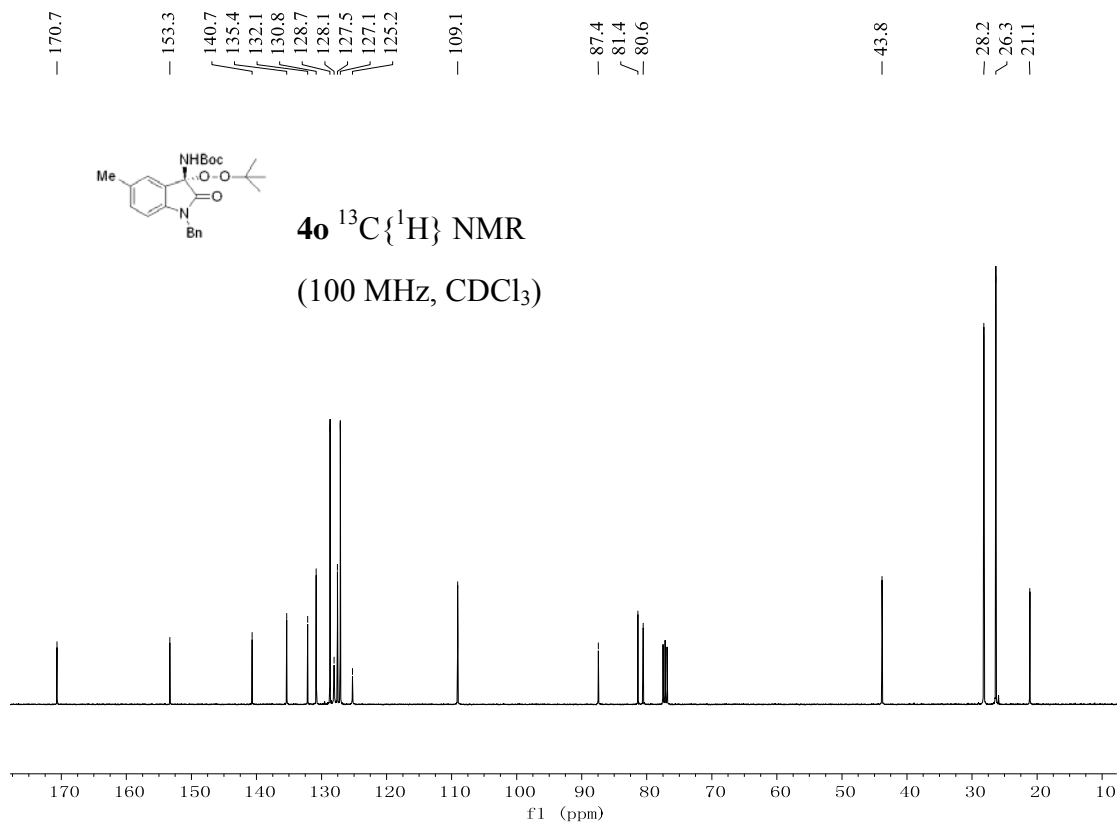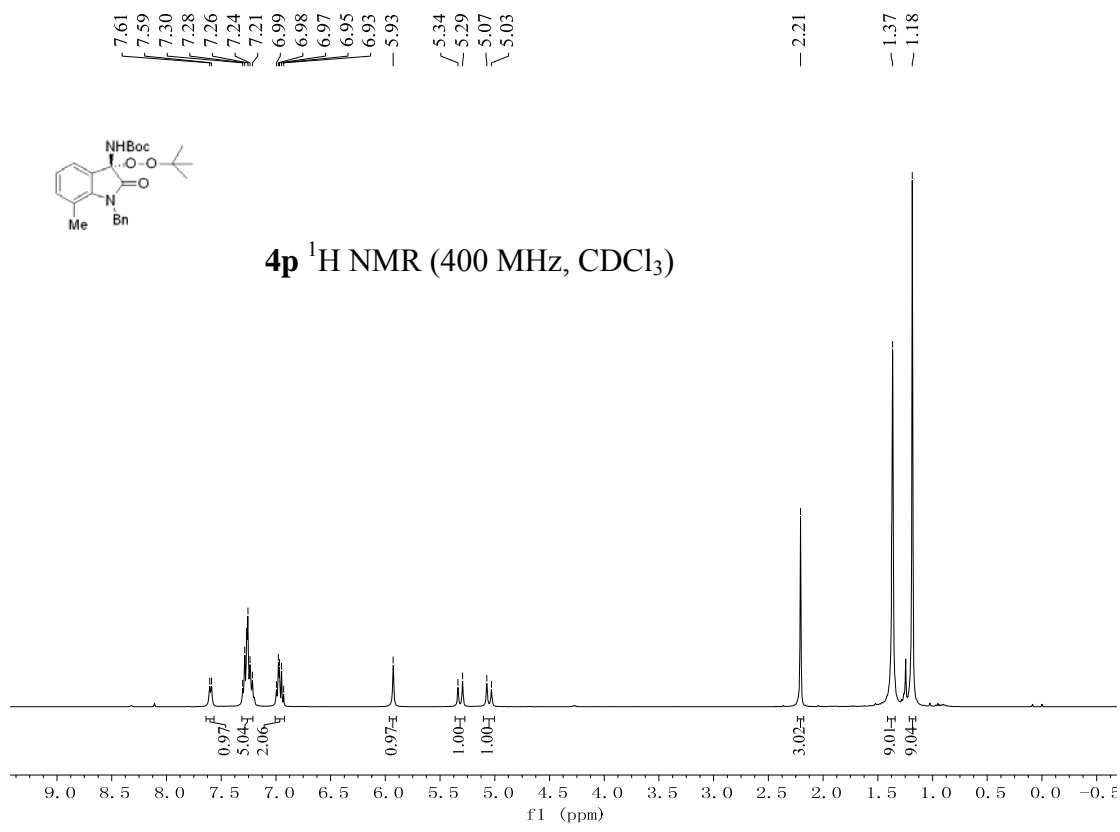

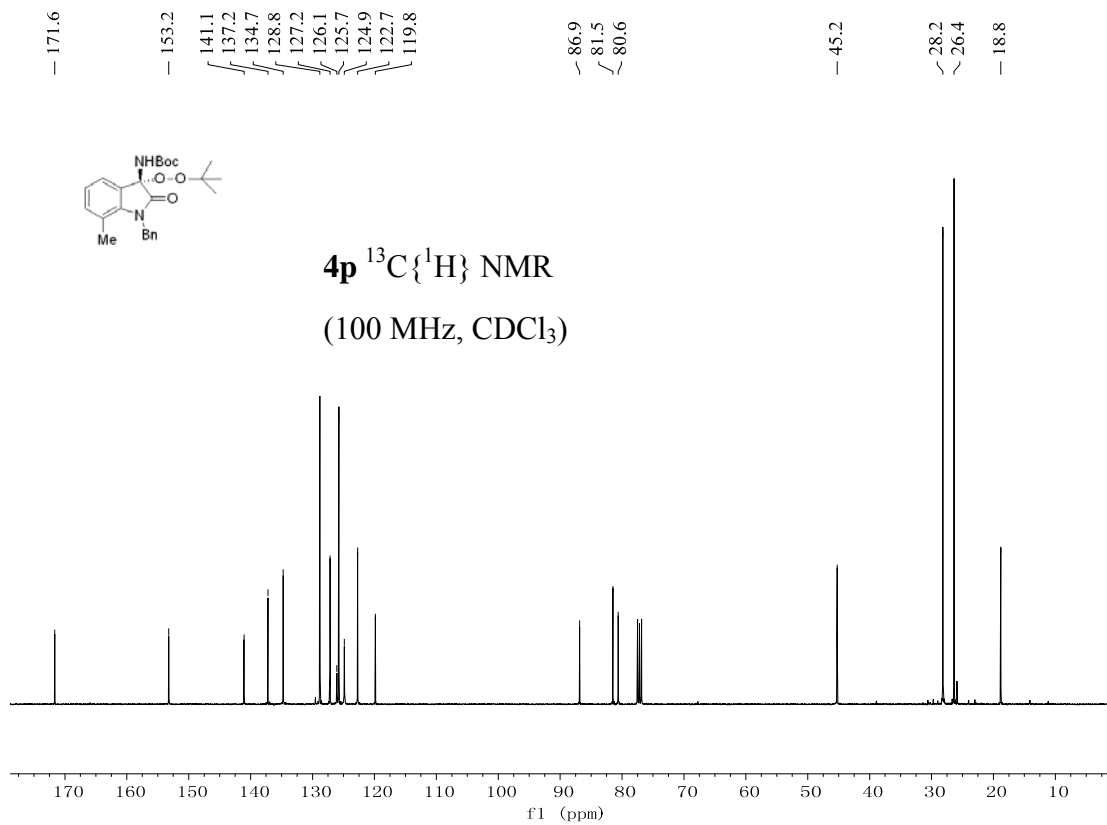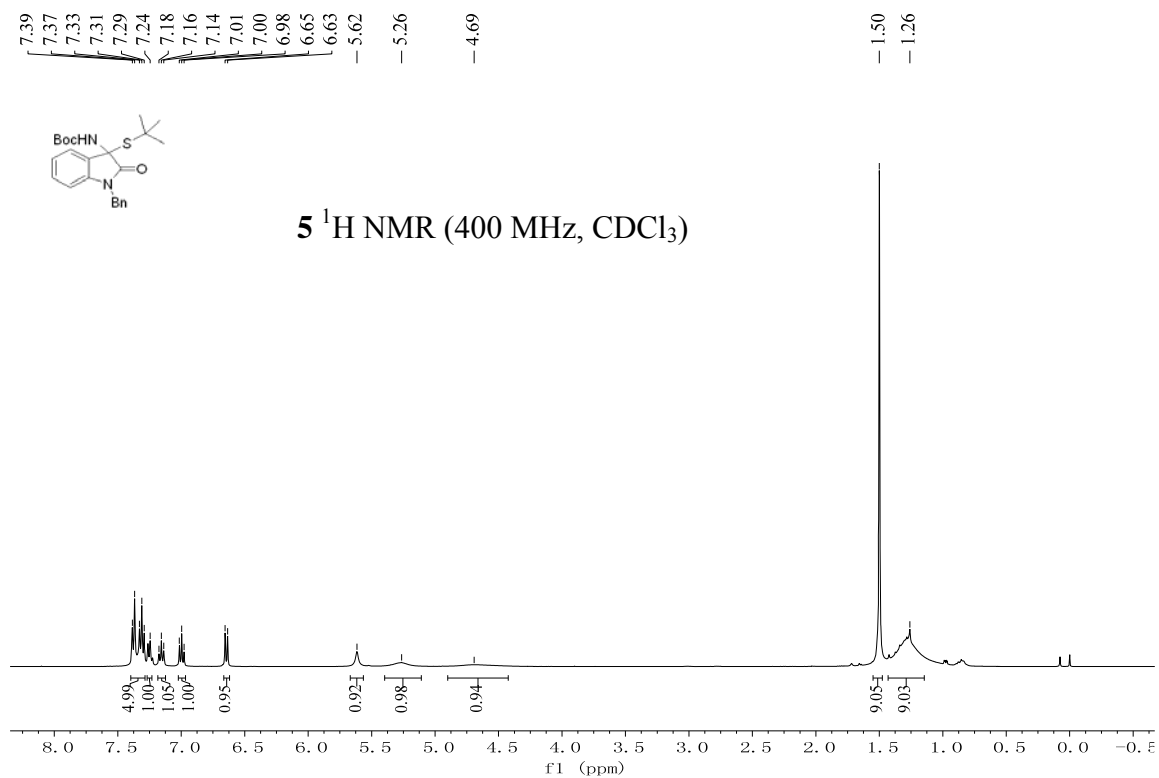

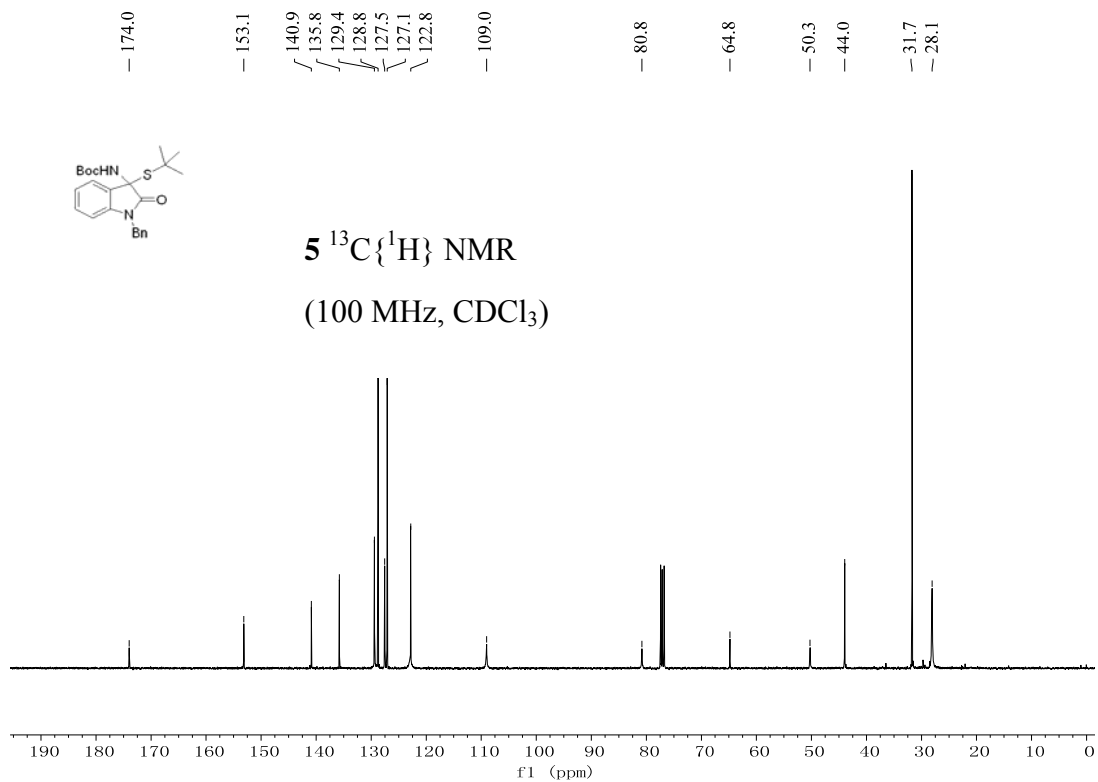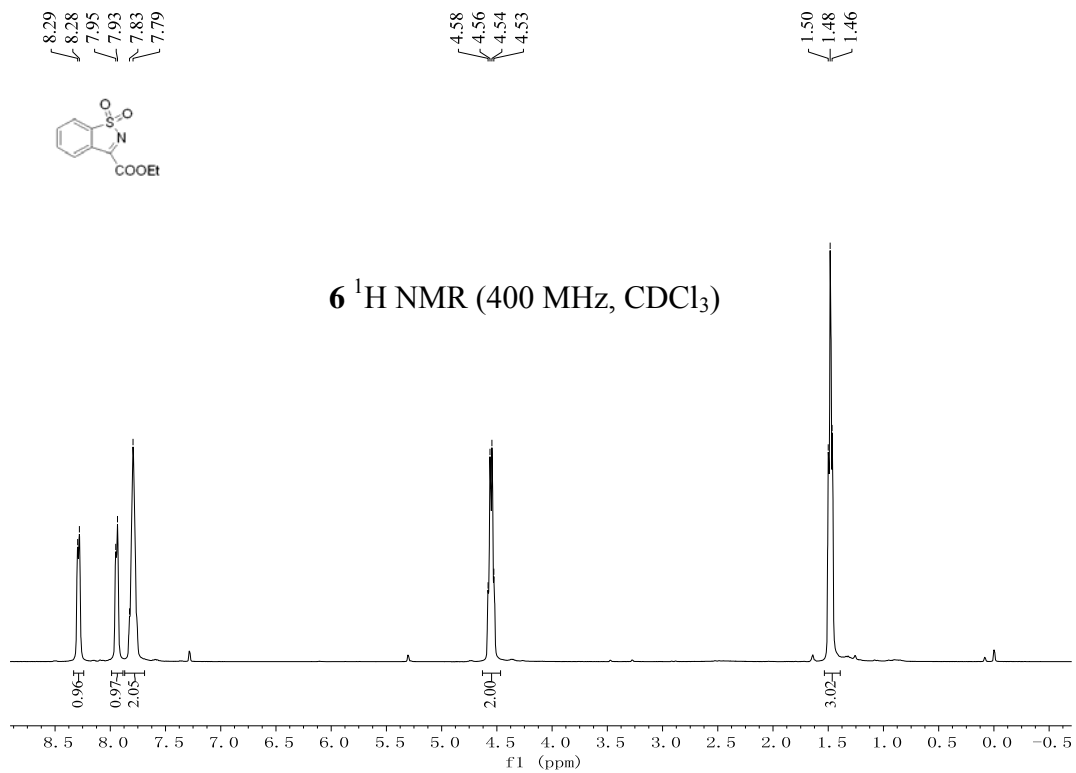

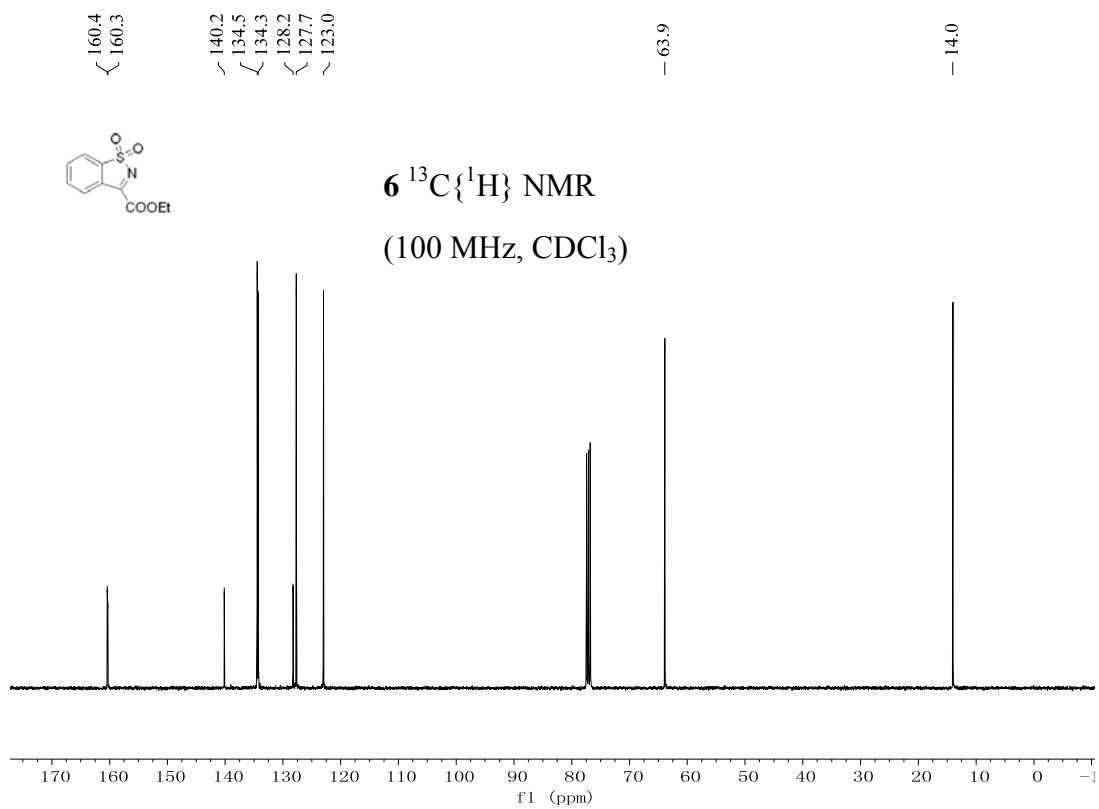

#### 4. References

1. (a) C. Yao, Y. Chen, C. Wang, R. Sun, H. Chang, R. Jiang, L. Li, X. Wang and Y.-M. Li, *The Journal of Organic Chemistry*, 2022; (b) S. Yu, Q. Cai, C. Wang, J. Hou, J. Liang, Z. Jiao, C. Yao and Y.-M. Li, *The Journal of Organic Chemistry*, 2023, **88**, 3046-3053.
2. M. J. Frisch, G. W. Trucks, H. B. Schlegel, G. E. Scuseria, M. A. Robb, J. R. Cheeseman, G. Scalmani, V. Barone, B. Mennucci, G. A. Petersson, H. Nakatsuji, M. Caricato, X. Li, H. P. Hratchian, A. F. Izmaylov, J. Bloino, G. Zheng, J. L. Sonnenberg, M. Hada, M. Ehara, K. Toyota, R. Fukuda, J. Hasegawa, M. Ishida, T. Nakajima, Y. Honda, O. Kitao, H. Nakai, T. Vreven, J. A. Montgomery Jr., J. E. Peralta, F. Ogliaro, M. J. Bearpark, J. J. Heyd, E. N. Brothers, K. N. Kudin, V. N. Staroverov, T. Keith, R. Kobayashi, J. Normand, K. Raghavachari, A. P. Rendell, J. C. Burant, S. S. Iyengar, J. Tomasi, M. Cossi, N. Rega, N. J. Millam, M. Klene, J. E. Knox, J. B. Cross, V. Bakken, C. Adamo, J. Jaramillo, R. Gomperts, R. E. Stratmann, O. Yazyev, A. J. Austin, R. Cammi, C. Pomelli, J. W. Ochterski, R. L. Martin, K. Morokuma, V. G. Zakrzewski, G. A. Voth, P. Salvador, J. J. Dannenberg, S. Dapprich, A. D. Daniels, Ö. Farkas, J. B. Foresman, J. V. Ortiz, J. Cioslowski and D. J. Fox. Gaussian 09, Revision D. 01. Gaussian, Inc., 2013.
3. Y. Zhao and D. G. Truhlar, *J. Chem. Phys.*, 2006, **125**, 194101.
4. (a) R. Ditchfield, W. J. Hehre and J. A. Pople, *J. Chem. Phys.*, 1971, **54**, 724-728; (b) W. J. Hehre, R. Ditchfield and J. A. Pople, *J. Chem. Phys.*, 1972, **56**, 2257-2261; (c) P. C. Hariharan and J. A. Pople, *Theoret. Chim. Acta*, 1973, **28**, 213-222; (d) T. Clark, J. Chandrasekhar, G. W. Spitznagel and P. V. R. Schleyer, *J. Comput. Chem.*, 1983, **4**, 294-301.
5. M. Dolg, U. Wedig, H. Stoll and H. Preuss, *J. Chem. Phys.*, 1987, **86**, 866-872.
6. A. V. Marenich, C. J. Cramer and D. G. Truhlar, *J. Phys. Chem. B*, 2009, **113**, 6378-6396.
7. J. Lu, F. Sha and X.-Y. Wu, *Tetrahedron Letters*, 2019, **60**, 1161-1165.
8. J. Liu, F.-M. Zhu, Y.-B. Chu, L.-H. Huang and Y.-F. Zhou, *Tetrahedron: Asymmetry*, 2015, **26**, 1130-1137.
9. T. Arai, K. Tsuchiya and E. Matsumura, *Org. Lett.*, 2015, **17**, 2416-2419.
10. D.-L. Kong, L. Cheng, T. Yue, H.-R. Wu, W.-C. Feng, D. Wang and L. Liu, *The Journal of*

*Organic Chemistry*, 2016, **81**, 5337-5344.

11. C. Beceño, P. Chauhan, A. Rembiak, A. Wang and D. Enders, *Advanced Synthesis & Catalysis*, 2015, **357**, 672-676.
12. H. Wang, T. Jiang and M.-H. Xu, *Journal of the American Chemical Society*, 2013, **135**, 971-974.
